# Supplementary material for: Parallel CRISPR-Cas9 screens clarify impacts of p53 on screen performance
Source: eLife. 2020 May 22;9:e55325. doi: 10.7554/eLife.55325 (PMC7244323; doi:10.7554/eLife.55325)
Supplement: Supplementary file 1. — A comma separated values table (CSV). Rows contain information about CRISPR plasmids used in screens performed for this paper. For each plasmid, columns give the barcode DNA identifying the plasmid, guide name, symbol of the targeted gene, and the two genomic sequences targeted by the guide RNAs expressed by the plasmid. [file elife-55325-supp1.csv]

seq	guide	gene	grna_a	grna_b
CACATGGTCTCTTGGAACTCCTCTT	TEDH-1000488	ABL1	CATGGCTGACGAGATCTGAG	GCAAGGTACTCACAGCCCCA
AGTCTTCGAGTTATTGGTGGTGAAT	TEDH-1000491	ABL1	TTTCTTCTCCAGGTACTCCA	CCTCCTCGCCGGTGGCTAGG
GATTCCCAAATTTTTTGTCTAGCCA	TEDH-1000490	ABL1	AGGCATCTCAGGCACGTCAG	GTCTTAGGCTATAATCACAA
GCTGTGTTGCTCGTCCGGCTGAGTT	TEDH-1000492	ABL1	TTGACTCGTCCACATTTGGA	AATCAGCTACCTTCACCAAG
GGGTCTGCAGCTGGTGGGGCGCATG	TEDH-1000489	ABL1	CCATCTCGCTGAGATACGAA	CTTAGGCTATAATCACAATG
CATTTCAATATTAACCAGCTCTAAC	TEDH-1000679	ACD	TCACCAGTCCGAGGTGTCCA	GCGCAGGCGCGGGGTGTACG
AGAGGTTAGTTAAAGACTGTGGTGA	TEDH-1000681	ACD	CCCAGCTTCTGGATGAAATG	CGAGCACAGAGGGACGTGCA
AGTAAGAGGGCCCGGGCTAGTAGTG	TEDH-1000680	ACD	CGGGGCCTCTCACCAGTCCG	CCCGTCAGACACAAGCAGCG
GCAGGCTTCTTCAGAGGGTATCTTT	TEDH-1001012	ACTL6A	GATTGCAAATAATACAACAG	CCATCCTGTTCTCATGTCAG
AGGCGGAGTAGTTTACAGGGCAGCA	TEDH-1001014	ACTL6A	ATTAGTATCTATGTAGTAGG	AAGCAAGAATATGAAGAAGG
GAAAGTACTAGTAGTAACAAGCGAC	TEDH-1001015	ACTL6A	ATAATACAACAGTGGAACGG	CCTCTGACATGAGAACAGGA
GTACTCATTCCCGATGTCACTGCGC	TEDH-1001011	ACTL6A	GTTCATTATGAATTCCCCAA	GGCGATAAAGGCAAACAAGG
GTGGCATCTAATAGGACTGGGCCTG	TEDH-1001100	ACTR5	CCCGTGCCCCGCCACGACCG	CATGCAGAATCTCCTCCATG
GGTTATGTGGCGGGGGGTGGCACAA	TEDH-1001097	ACTR5	TAAGCAGAAAATCCTCCAAG	GCACTGGGTCCGGTGCGGCA
CGGGAGCGGCTGGTGAATGCGTGGT	TEDH-1001099	ACTR5	GCCGCGCCTGCAGTTCCGCG	CCAAGCGGAAGTCAACCTCG
CCCAGGGGTTAGGTTAACTTAGGGT	TEDH-1001110	ACTR8	GATGGCCGGCAACGATTCCG	GGATTTGAAGGGGATCTTCG
GTCCGCGGTGAGAGTGTCTTTCAAT	TEDH-1001108	ACTR8	TGTATGCTGTGTGGAGGATG	GCTGATTGCATGGAAAGGAG
TTGCAAATGTGGGCGCCACTGACCG	TEDH-1001109	ACTR8	CTTTCCATGCAATCAGCCGG	ATCACTGTTCGGGAAATAAG
AGTAACTCTATAGGGCCCTGGTCTT	TEDH-1001726	ADH5	CTAACCTTTGCCAGAAGATA	AGTTATCATGGGCTGTAAAG
AAGTCGTCGTTAGCATAACCACGTG	TEDH-1001729	ADH5	TCTATCTCCTCTATGGAGAG	TCAGGGTATAGGCATCGGTG
TCACTAGCGATTGGAGGGGTAGGCG	TEDH-1001730	ADH5	TGAATGTATTGGTAATGTGA	GGGAAAGGATTAATGCCAGA
GTCCTATACATAGAACAGTGCCGTT	TEDH-1001728	ADH5	ATCGGTGTGGCAAACCGCAG	ACTTCAGGTTATCAAGTGCA
CCTATACTAGCCATGCTAGAAGGGG	TEDH-1002300	AICDA	GCAGAAAGTCGGCCACATGT	TCTCCAGAACGGCTGCCACG
TCAATATGTTTCGGTATGTCATTCG	TEDH-1002299	AICDA	TGACGCGGTAGCAGCGGCCA	CATGTGGCCGACTTTCTGCG
CCACTACAAAGCGACTATAAACGTG	TEDH-1002302	AICDA	CTGCGGCGGCTGCACCGCGC	CTCACAGAAGTAGAGGCGCG
AGCAGCCGGTGGTGTTAGGAACTTC	TEDH-1002301	AICDA	GAACTTTCAAAGCCTGGGAA	AAGTCATCAACCTCATACAG
GTTAAGACGGTCCTTGGTGGTGTCT	TEDH-1002493	AKAP8	GCGTTTGGACATGATGTCCA	GGGCGTGGACAGGGGCTCAG
TATGGTTGATTAGCTATTCGCGGGG	TEDH-1002494	AKAP8	GGCTGAGGACGAAGGCCCCA	CTTGGTGCTTATGAACCGCA
GGCCGCGAATTTAGGAGCCACGCGT	TEDH-1002495	AKAP8	CGAGGATGTGAAGAAGAGAA	GCTGGACCTGCCAACACCCA
GGAACGTTAGAAAATAGGTGTTGTT	TEDH-1002686	ALDH2	TTGATAGCAAGACCGAGCAG	CCATGAGGATGTGGACAAAG
GCTATCAATGCTTCACGTTGGAACG	TEDH-1002683	ALDH2	TCCTCGGCTACATCAACACG	CCACTTTGTCCACATCCTCA
GTCCCTTTTAGGATAAATCTACTGC	TEDH-1002687	ALDH2	TGTGGCCAACCTGATCAAGG	ATAGGGCTTGCCATTGTCCA
CGGGTCATCGGTTCCATCGTAGGTA	TEDH-1002834	ALKBH1	ACTGTGCATAAACATGGCCG	GAAGCGGAAAAGTTTCCGAA
GGTGGTAAGGACCACCGAGTTTTCA	TEDH-1002837	ALKBH1	AGGGGTCATCGACTTCTCGG	GAAGGACACGAGGGACTGCG
TGGATGTCCATCAATCGGTGATCCT	TEDH-1002835	ALKBH1	CAGCGGCTACTTGCTCTGAG	CTAGCTCAGATCTGTCTACG
GACGTGGATAAGCTGCGGCATACAC	TEDH-1002836	ALKBH1	TCGGCGGCCCACGCAGCCCG	AGAGGAAACCCAGGTCAGAA
GTGCAGTTTCAATTGAAACTGAGTT	TEDH-1002833	ALKBH1	AATCTCTCGGGAGGACAGCA	CATCCTCGATGGGTTCTAGA
TCGTCCCTAGTCTGCCGATATCACG	TEDH-1002838	ALKBH2	GGCCCAGGAGAGAGGCCCCA	TCCTGGTGAAAGGGGCTCAA
ACGTCAGGCACGGTAGGGGGTCCGT	TEDH-1002839	ALKBH2	AGTCCTGTTTGGCAAAGCTG	AGAGGCAATGGGGCTCCCAG
ATTTTCCTAGATAGCTCTATTGCAT	TEDH-1002841	ALKBH2	AGAGAGGCCCCAGGGAATGG	ACTGTGGTACCAGTGCGTGT
TAGGAGTTCAATGGTACTTATCGAG	TEDH-1002842	ALKBH2	AGTAAGCTCCCGTGGGCCAG	CGAAAAGTCAGATTCACCCG
TAAAGGTGGTCCACGCGTTTAGGAT	TEDH-1002844	ALKBH3	GAAAGAAGCTGACTGGATAT	TAACAAGGTCCCATGATCCA
TATATGTCCAGGGTAGGGCCTGTGG	TEDH-1002846	ALKBH3	TTCTTTAGTGTGCGCAGCAC	AAGATGTTCCCTGGAAACAG
GGGTATCGCCCAGACTTTCATGCAT	TEDH-1002843	ALKBH3	GAATGGAGACTACACATATG	TCTTTCACGTCAACAAAGCC
CATTCTCATTTTTGGGGATTAAGTC	TEDH-1003101	AMN1	TGCTGCAATCTCACTGACGA	AACAGATTCAAATATAAGTG
AGATTTTTCATCTTGACTGACTTAG	TEDH-1003103	AMN1	AAGAGTAATATACGTATTTG	TTTGCTTAGGTATCTGACAG
TGCTGTTGTAGAGGGGAGCTAGAAC	TEDH-1003102	AMN1	GTATTTGAGGACAGTAAGTA	GGTGTGATTGCACTTGTTAG
TGTGGGTAGGTTATTATAACTCGTT	TEDH-1003105	AMN1	CGAGTTTCTGTAACTTCAGA	ATACGTATATTACTCTTCCA
CCGTTTGGTCCATAATAACCTTTTT	TEDH-1003493	ANKRD28	CCAGGGATCCGTGATAAGCA	GTGAAGGCGGCTGCATGGAG
TACAATTGCTCTCCGTGTTTAGAAT	TEDH-1003495	ANKRD28	CCCCTTTGCACATAGCAGCA	ATGTAGATGCCAAAGATAAG
CTTGGTATGTCAGCGGGTGATATTC	TEDH-1003494	ANKRD28	GTAGATGCCAAAGATAAGTG	CACAGGATAAATGACAACGA
GGATTGTTGAAGGCTAGACACCGGG	TEDH-1003497	ANKRD28	GCTTAAGGCTGCCAAATGGA	GTAGATGCATTACTTCAACA
AGTTTTCGCGTTGAAGGGGGTTCTG	TEDH-1003521	ANKRD32	AGGAGAATTGTCATGTTCCA	TGTCAAAGAAAATAGGACAG
TCACGACCGTTCTAACTAGCTACAT	TEDH-1003517	ANKRD32	GGCAAGCTGCTACTACAGCA	GAAGAATCAATTTCTCCACT
TATGGTTCCCATTACGAGGTAAATC	TEDH-1003519	ANKRD32	ACAACCAGTGTACAACGTAG	AGCTTGCATAAATAACCAAG
TAGGGCGTTCGAGGTTGTGCCCTAT	TEDH-1003520	ANKRD32	CTAATTTAGACAATGCTGGC	AGAACCTTACTAATGCTGAA
CTAGTACGTGGGGTGGCGGCTTCGT	TEDH-1003582	ANKRD44	AATCTTCAGCGGTGATCCAG	ATTAACACCTTAATAACCAG
CGACGTGTAACTGGACTGCAGATAA	TEDH-1003583	ANKRD44	GCAATGCTACAACATCCAAG	GGCTGCTGCCACATGAAGAG
TATTCGTATTTACTAACTGACAATG	TEDH-1003586	ANKRD44	CTTGAATTGTTAGTAAACAA	TACAGGTCACTTCTGCGCCA
AGGGATGCTAACGCGATGAATACAT	TEDH-1003609	ANKRD52	GTAGCAGCCATCTAACCCAA	GCACTTGCTGATCGACAGTG
CGGTGTAACTTCTTGGAGCCCGGGA	TEDH-1003607	ANKRD52	AGCACCACAGAGATGCTACT	GGGTCCGCAGTACTGCAGTG
CAGATTCAGTGGGATTTTAAGTGTA	TEDH-1003608	ANKRD52	GCAAGTGCAGGGAGTCAGTG	TGTGGCCCCATGACTCAGCA
CGGTAAAACCTTACTCAAATCCAAG	TEDH-1003611	ANKRD52	GGCACAGCACAAATGCGTCG	TCTGGACGTAAGGGACCACA
CCTAGGGAGATGTTTGTGCGTTTTC	TEDH-1003610	ANKRD52	AATGTCCTTTAACTGCCTGG	CCGCCGTCATGAGCGCAGTG
TTCCGGGCGATGGACTCGGCAGGAG	TEDH-1003784	ANP32E	CAATTTCCCCATTGACACAC	TCCACTCTTTAAGAAGAAGG
TGTTTGATTACTACCCTCGCGCTCA	TEDH-1003785	ANP32E	GTTTATTTAAGCTGGGAAGC	AGTGATAATATAATTTCTGG
AAGGTCAATTGACTGGCGGGCGGGT	TEDH-1003786	ANP32E	TAATATAATTTCTGGAGGCT	GTTAAGGAACAGATCCCCGG
GCACTCTTCGTTTGAGCTATACTTT	TEDH-1003782	ANP32E	CTTACCTACCTCAATCTGAG	TGGTCCACCGGAAGGATATG
CCAGTGTAGCGGAGGTGTTACCACG	TEDH-1004048	APAF1	GTGAAGGTGGAGTACCACAG	ATTTGTGTAGAAGGTCTGTG
CTTTGCTCTCGATAAGGCTTATGTG	TEDH-1004050	APAF1	CCAGGATGGGTCACCATACA	ATGCGACATCAGCAAATGAG
ATAAAGTGCCTTTGTTTGCGTCGGC	TEDH-1004067	APBB1	ATTACTGGCACATCCCAACA	CAATGCTGCCAGCCTCTCAG
GAGTATGTGTTTTATATGTGGTCCG	TEDH-1004070	APBB1	TGTAGGGTGGACTGTCCGCA	GCAAGATGGTGAGGGTAGCA
TTCTATGGGGATATGTCGAAAGCGG	TEDH-1004068	APBB1	AGGCTGGGTAGAGATGACCG	CCCTGGGTTGGTATTCCGTG
AAAGCGCCTCATCTAGGTCGACGAG	TEDH-1004066	APBB1	GCCGTGCCACAGACTCAGCA	CCTCCAGCAGCCGTGAACAA
CCGGGGGTGGTTTCGACTCTGTTTC	TEDH-1004090	APC	CGTCTGTTCAGGCTGGTGGA	TTGGTGGCATGGTTTGTCCA
GGCACCCGCTGTGTAGCGGGTCGAA	TEDH-1004087	APC	CCACTTACCATTCCACTGCA	TCTGTATAAATGGCTCATCG
GATGTTGGGTATTCCTGTTACGGGA	TEDH-1004086	APC	ACTTTAGCCATTATTGAAAG	TGAAACACTGTCAATCACCG
GTACACGATGATCTATGCTTCTAGT	TEDH-1004119	APEX1	AATTGACCTTCGCAACCCCA	GATCAGAAAACCTCACCCAG
CCCGTTGGTTGTATCTCTTGTTAAC	TEDH-1004122	APEX1	GAGGTCTCCACACAGCACAA	ACAATGCAGGTAACAGAGAG
TGACCGGTTTGATTCGCCATGTGAG	TEDH-1004123	APEX1	ACTGGAGTACCGGCAGCGCT	CGAAAGCCCCTTGTGCTGTG
GTGGTTTTGTGGAGACCCTGATTGC	TEDH-1004120	APEX1	ATTGACCTTCGCAACCCCAA	CCAAGAGCAGATCTTGAGTG
TCAGTTAATGTAGGGGAGACTAGAG	TEDH-1004128	APEX2	GCATCACACATGGCTCCCTG	TGCAAACTCAGGGAGGAAGC
GGGCTGGGGTTATACCTGTGTTGTT	TEDH-1004125	APEX2	GGGAGGAAGCGGGTGCACAG	TACATGTGTGCCAGGCCCCG
TTAGAAGCTATAGGGCGCTACAATT	TEDH-1004127	APEX2	CTCATTCTGGAAGTCTGTGC	GGGTCAGTGGGAGGACCCCG
GCGTATTGTCCAACACGTAAGGAGG	TEDH-1004126	APEX2	TTCACAGTACGCATCACACA	AGGCAGCTCTATGTCAGGAG
TAACTACGGGGGGCAGGGGGTATTC	TEDH-1004153	APITD1	AAGACCTTGAAATGTTTGCA	GGCAGCAGTTCACTATACTG
ACCGGCAGTTTAAGCGCGTTTATGT	TEDH-1004149	APITD1	GCAGCAGTTCACTATACTGT	GAGCTGACTTTCCGACAGTG
GAGCGGCCCGATTAGACTGAAGTTC	TEDH-1004152	APITD1	ATGTGAAGCTCTTAGCCAGG	CCCACCTTGCAAACATTTCA
TGGCCGGAGGAGGACTGTTTCTGGT	TEDH-1004150	APITD1	CAGCTCCGAAATGGCCGCAA	CACATCTTCAGTGTTAATTG
CGTCCCAATAAGAGGCCACAGAGGT	TEDH-1004160	APLF	GTTTAAGGTAATGTAATCCA	ACTGGTGCCTCACAACTGGA
TCTATTAGGTGTTAGTATTTTGCTA	TEDH-1004163	APLF	CGACAGCTTTCTAGATGATG	GAGGCACCAGTAGTCTCATG
GGACGCGGGGCTTGGCGAAGTGTTA	TEDH-1004161	APLF	GATGACTCCCACAAATAGTG	CATGAGGTAAATTAATCACG
AGGAACCATGAGGGTACGCGGTGGG	TEDH-1004159	APLF	CTTTCAGTACCAGCAATCAG	GCAACTGATTCAGTTCTACA
CGAGTAGCAAGGACAGCTGGCAGGC	TEDH-1004220	APOBEC1	AGATCACTAGAGTCACACCA	ACAAAATCGGCAAGGTCTCA
AGGCATACCAAGGTTAGAGGAAGCT	TEDH-1004222	APOBEC1	TAGATCACTAGAGTCACACC	TAGAGTATTATCACTGCTGG
GAGGATTCACGCGGTAAGCACGGGT	TEDH-1004219	APOBEC1	GCCTGGGAGCATTCCCAGCA	GTAGCTAAAAGGATGTGTGG
GGTAACGTGCGGGCCTGGTTCGCGT	TEDH-1004223	APOBEC1	GAGTTTCTGAGTCGGCACCC	CTTGAAATCTTTAAACAGGG
GTCCAATGTGTTAGTTGTCGAGTGT	TEDH-1004221	APOBEC1	TGATGGAGCAGCTCATGGAT	ATTAACTTCCACGTGATTGG
CTATCGGCTAGTAATAGTGTTAGCG	TEDH-1004225	APOBEC2	GCATGCGGCTGCCCATGCAG	GGTCAGCACACGCTGCACAG
AGGTATCGGTATTTGGACTGTAGCC	TEDH-1004226	APOBEC2	CCAGGTGACATTGTACCGCA	TAAATTCCAGTTCCGGAATG
ATGAATGTATCTATAGATCTTGAGG	TEDH-1004228	APOBEC2	AATGTCCTCCCAGGGCTGAA	GGGTCGACTCTTCATGTGGG
TACTTCATTGCGACTCCAGCGGGCT	TEDH-1004227	APOBEC2	GTGCTTCAACCACATAGCAG	GCGGTCAGCACACGCTGCAC
AAGGCGGTTCCAATGGATTCATATC	TEDH-1004230	APOBEC3A	GGACCCGGCCCAGATCTACA	GTCAAGATGGACCAGCACAG
CTTTGATTGCGGCGTGTCCTGAAGC	TEDH-1004229	APOBEC3A	ACATCCCTGGTGGTCCACAA	GCACAGCCCCAGGAGAAGCA
TGTTGCGGCGGCAGTAGATGGGCGC	TEDH-1004233	APOBEC3A	GGAAGCCCTCACCTGGAGAA	GCACTGCTGGGACACCTTTG
TTGGCACTTTGTTTCGCTGATGGCT	TEDH-1004236	APOBEC3B	CATGGGCTTTCTATGCAACG	ACATCCCTGGCGGTACACAA
ATCGAGCTTGGTGATTGGTCACAGA	TEDH-1004238	APOBEC3B	GCACAGCCCCAGGAGAAGCA	CCAGACCTACTTGTGCTATG
GTTGGGTTCGCTAATCATGCACACC	TEDH-1004237	APOBEC3B	GGACCCGGCCCAGATCTACA	TGAGAATCTCCTTTAGCGTG
AGCGTCGCAACTGATTGTATGAGGA	TEDH-1004245	APOBEC3C	CCAACGATCGGAACGAAACT	AGACCCATTGTCATGCAGAA
GGCTTGATAACCTGCGATTCCACAT	TEDH-1004243	APOBEC3C	GATACTGGAAGTAGTAGAGG	GAGTCAGGAAGGGGTCGCTG
GCGCATTCAGTCACACATTGGGGTA	TEDH-1004246	APOBEC3D	ATAAGAAGCACATTTCTGCG	TGAGAATCTCCTTTAGCGTG
AGGCGGTACAGAAGGCTGGCGGGGA	TEDH-1004248	APOBEC3D	ATCCCGGTAGTAGTAGAGGC	GTAGCCCATGATCTTCACGG
ATACCCGGACTTTGGATCTTATCTA	TEDH-1004250	APOBEC3D	GTCTCCTAACACAAACTACG	CCGGTAGTAGTAGAGGCGGG
CGACCTCCTTGCCGGGGCGTTAAGA	TEDH-1004247	APOBEC3D	TTTGTAGCCCATGATCTTCA	TCTCAAACCGGAAATACACC
CGGACTGTGGCTGATTATTGTGTTC	TEDH-1004252	APOBEC3F	GGGCAGCGGTACCTGAAGTG	GTGCTACGAAGTGAAAACAA
CCTCATCTGTTCTTAGGCCTTAGTT	TEDH-1004251	APOBEC3F	GGTATTCCGACGAGAAAGGA	GCGTCCAAACGGGGCCTTGA
TAGGTGGTAGTGGTTAGCTTTGTTG	TEDH-1004254	APOBEC3G	ATTACTGCACATCATGCTGG	ATGATCTTCATGGTGGCACG
TCCTTAGCTCCGTTGGTTAAAATGG	TEDH-1004255	APOBEC3G	GCCCGCATCTATGATGATCA	TCCACTGGTTCAGCAAGTGG
TGATGGGACGCTGTGTGTGGGGTCG	TEDH-1004253	APOBEC3G	TCCTCCACTTGCTGAACCAG	ATTTCAATAATGACATACAG
TGTGTTTTTTTGTCTCGATTTCGTC	TEDH-1004262	APOBEC3H	AAGTCACCTGTTACCTCACG	GTGTGGATCCCAGGTCCCGG
CGGTATTCATTTCGTTCCCTGTTTG	TEDH-1004260	APOBEC3H	GGAAGCCCATGACCTCCACC	GCACCAGTGGTAGTACAGGC
TACTATCGCATTTTTCTGACCTTAA	TEDH-1004259	APOBEC3H	GATGAAGTCAACCAGCTCCC	TCAGAAGGCCTTACTACCCG
GCGGCGCAGGTGGGTGGGAGGGTGC	TEDH-1004387	APTX	CCTTAAGCATATGCACACTG	GGCTTACCTCATACTCGGAA
ATAACGCCTTGTTGGGCCAAGGTGC	TEDH-1004391	APTX	TGATCACATGAAGATGTACA	GATAAAGGATAAATACCCAA
TCCAGCGTGTGTCATCCTTCCGTAT	TEDH-1004390	APTX	ACCATTGGCTGGTCTTACCG	ACCTCATACTCGGAATGGCG
ATAGAGGGACGTGAATGTCAGTGTT	TEDH-1004388	APTX	ACCCTGGCCTGGAAACACAC	TCCACGGTAAGACCAGCCAA
GGAGATGAGTTTTATGCTTTGCCGG	TEDH-1004904	ARID1A	GGGGTCTCATCCTTACTGTG	CAGAGCTCCTTCTGTCCCCA
CCTGGGGAGGGAAGACCGTGGTGAT	TEDH-1004907	ARID1A	CGTACAGAGTAAACTCTGAG	GAGTTAACTTTACATCCCCA
AAGATTTTGTGGTTTGATGCTTTAA	TEDH-1004906	ARID1A	GATGTTGGCGAGTGTAACCA	ACCAAGTTGTATGAGCTGGG
TGCAGGAACGCGGCTGCGTTCTTTG	TEDH-1004903	ARID1A	ATACTCACAGGCAAGCTGGA	TTGAGATGTCCAAACACCCA
TTAGGACTGTAGGAGAGGCTGAGAT	TEDH-1004908	ARID1B	AGTCTGTCGAGAAATGTCCA	CGGGATGCTGGAGAGATGAG
GTGCCTCCTATTCACTCATCCCCTG	TEDH-1004910	ARID1B	ATATGATGGTACCCGATCAG	GATGCTTCTACTGAGCCAGG
TGCGGTTGACCAATGGGGAGCTGTG	TEDH-1004912	ARID1B	GCTCAGCACCCCGTACCCCG	CGTCTGCGTCAAAGAGATCG
CATAATGTGTCTTATTGGGGTAAAC	TEDH-1004913	ARID2	CTTACTGTCGTCAAACACCC	TATCTCCAATGGAACCACAA
GAAAATACTAGGACGTGGAAGTTTG	TEDH-1004916	ARID2	TTAACGATATTGAAGGACAG	GGGAAGGAGCTGGATCTTCA
AATGCTATGATTTTTATCGTTTTCA	TEDH-1004917	ARID2	ACTTGTTTCTGTCAGAAATG	GAAGAAGATGGAGTTATGTT
CTAAGATGCGTGATATCTCCTTCGT	TEDH-1004914	ARID2	ATGTGGTAGGAGTAAAACGG	GCTTGTAATCTCAACACTCG
TGTGCAGCCAAATCGTGAGCAAAAG	TEDH-1004915	ARID2	GCAGTCTCCATTACACACAG	GCACTTATGGCTCTGAGGAG
AGACTCCCGCGTTTCGGTGAAGGTG	TEDH-1005532	ASCC1	TTGGAAAGAGAGGGGACACT	GGGCTCATCAGCACACTCCA
GTCATAAAGTGGACCCAGGGGGGAC	TEDH-1005529	ASCC1	GCATATAGTTGGAAAGAGAG	TTCCTAAACCTGGACAAGAC
CATGCAGAGATCCACATTGATTTAC	TEDH-1005530	ASCC1	TCATCTAACTATTGGGATGT	GCCAAAGTCCATATGAAAGA
AGGCGCAAATATCACGGTGTCGACG	TEDH-1005573	ASF1A	TACAAACATATGCCTTCCTG	GATCACCTTCGAGTGCATCG
TCCCGTGTGCTTGTGCGGCCTGTTC	TEDH-1005572	ASF1A	AACGGGTTGTAGAAAGGAGA	CTAATTACTTGTACCTATCG
CAGAGGGCTGTTCTGGACGTAGCGG	TEDH-1005570	ASF1A	ATTCCAGATGCAGATGCAGT	GGAATGGAAAATTATCTATG
GTGTATGGGTAGCGGAAAAAACACT	TEDH-1005571	ASF1A	GGTTCAGGTGAACAATGTAG	GGACAAGAATTTATTAGAGT
GTTTTGGATCATGTTGTGGGATTGG	TEDH-1005569	ASF1A	ACAAACATATGCCTTCCTGC	TCACAAGATTCCACATTAAT
TATTATTACCGTATTTGGAGCGTTT	TEDH-1005576	ASF1B	ATTTGATCAGATCCTAGACT	TCTGGGATGAGGGATGGGTT
AAGTGATTATTGGCGCTGGAAGAGT	TEDH-1005574	ASF1B	GGCCCACCAGCACCGAGTCT	TGGACAGGAGTTCATCCGAG
GATTGGATAACCTCACAGTCTGCTA	TEDH-1005578	ASF1B	TCAGTCTCTGGGATGAGGGA	GACCCGCTTCCATATCAACT
GTCCTGTGTCCGCGAGTAAAGCTCT	TEDH-1005575	ASF1B	GAAGCTGATCTCGAACCGGA	GATATGGAAGCGGGTCACCC
TATTGGCAGCGTGTGTGCTCGTAAT	TEDH-1005593	ASH1L	TGTAGTGCAAAGGGTCTAAG	AAGGGAATGATCTCATAGAG
CTACACGTTCCAGCCAGCCATAGGT	TEDH-1005589	ASH1L	AGTCATGATCTACAAATGAA	GGACCCATAGGGAGACCCAA
TTAAGAGTTAGCAGAGCCGTCGTAT	TEDH-1005590	ASH1L	CCAGCATGCATATAGGAAGG	GGTGATTGACAGTTACCGCA
GCTAAGGCATGTATGGTGTGGTACG	TEDH-1005591	ASH1L	TAACTTTCATTCCTTCAATG	TCATGATCTACAAATGAAGG
TAGTGGCAATTACGGGATTGCTATG	TEDH-1005592	ASH1L	CTATGAGATCATTCCCTTGG	ACCTCGGTGGACTAAAGTGG
CACGCTTTTTATACCATGACTTCGT	TEDH-1005596	ASH2L	GCAGTGCTGTGTCTACTAGT	GGCTGACGTCTTGTATCACG
CATTCGTTACAGAACCAGTACTAAA	TEDH-1005598	ASH2L	GGCCTTCTTGGTGGTCCCTG	CATAACCTAAAGGAGCTTGA
TAGCGCTTGTTTAGATAGTTACGGT	TEDH-1005597	ASH2L	CCACCTCCGGGCCTTCTTGG	AAATAACATTGTTAAAACAA
TTTCACATTTGTGTATGGCGTAATC	TEDH-1005792	ATAD5	AATGCCTCTTCCCAGCGCAG	TAATCCAGAATTGTAAGTAA
GAGGCTGTACGTACACTGACTGTTG	TEDH-1005795	ATAD5	GAATTTGTCTACCACTGCGC	GAGTCGATCTCTTCTCTATG
GGGCATGAGGGTGTAGGACGTACGC	TEDH-1005791	ATAD5	CAAGTTCAGTACTCCTTCCC	TTGAATTCAAAGTTGAAAAG
CTATCTCAGTTCCATCGGTCTGCGA	TEDH-1005813	ATF2	AGAACTTGTAAGCAGCACAT	ATAGCCAGATTTCTTCTGCA
GGAGGTTTTCGAGTCCGAATGTCGC	TEDH-1005811	ATF2	AGTGGGTTTGTTTAATGAGT	GCTCGTTCGACCAGTCACCA
GATTCAGGCGTACTGTGTGCTCGGG	TEDH-1005815	ATF2	ATTGGTTAGGACTCAGTCAG	TGCCACTTCATTTCTCAGCA
CTCGGTATTGCGTTGCCGTACCAGA	TEDH-1005968	ATM	TATGGACTCTGAGAACACAA	CCATTGATTCTACTTCTCCA
GACGTGTAGACAATATTGTGCCCTG	TEDH-1005969	ATM	GACAGCCGTGACTTACTGTA	TTAGGGCAGCTGATATTCGG
GGTCGTTATGCGAGGTGTGTTGGCA	TEDH-1005970	ATM	GTAAGATTGAGAAATCTCCA	TTAGCTGTGGAGTCTCTGAG
GGGGTGTTATGGTTCAATTCGCCTG	TEDH-1005966	ATM	TATGAACACGAAGCAATGTG	TAGATGCTGTGAGAAAACCA
GATGCATTGGAAATTGAGCGCGCTG	TEDH-1005975	ATMIN	AAGACCTTCCGGTGCACATG	TGATCTGGCCTGGAACACGA
ACATGTCCTGCCGTTGGTGACCTAG	TEDH-1005972	ATMIN	ACACCCATAGGACTGAGCAG	GGTGAAGAACAAGCTCCCCA
TCGGGGACAAGGGGGGTTAAGGTGG	TEDH-1005971	ATMIN	ACCTAGTAAGAAAAGGAAAA	TTGAGAACAAGACGACACAG
ATCTGCCTGTACAACAATGACTCGT	TEDH-1006435	ATR	ATTCTAGAAGCTTATCTGTT	TCATTTGTACACGATCGGAG
TTAGTTCAATTTTGGTTTGAGGGTG	TEDH-1006438	ATR	CAGCTTGGAAATTGTCACAG	ACATACCTGGTATTTAGATG
TACCTAACGTGGTGCATGGCTGTTC	TEDH-1006434	ATR	AATGGGTCCTATGGGAACAG	CAATGGTTGGTTATATTCTG
TAATAGCTTGTGGCCATGAACCACA	TEDH-1006437	ATR	TGAATTAAACACGTACAGAG	GGTCGAGCTATGCTACTAGT
ATTCTGCAATTCAGTGGGGTCCCAT	TEDH-1006447	ATRIP	GGGTCAGCATGCTCATCCGA	GCCGATGAAGAACTGTACAA
GTTTTGAATCTGGACGGGGCGTGAT	TEDH-1006446	ATRIP	CCTGGATGACCTCTGTGCCG	GACACGGTGCTGCTGCTGCA
AGGTGGTACAGGGAGCGTCTAATAT	TEDH-1006444	ATRIP	GCCAAACCCTGGTGGCTGCA	TTACCTGACATGGGAAACAG
CTAATCACTCGAAGCTCATTTCTTG	TEDH-1006448	ATRIP	AGCAGCTGCCAAGTCCTGCA	CGTGGTCCGCCAGCAGGGAG
TAGGCCTATTGAGCCGTGTCGGAGT	TEDH-1006463	ATRX	AATACTAAGGAAATACAAAG	CAATCAAGTCCAGAGATATG
GCCGCATTAGTAGTTGATACTTAGA	TEDH-1006461	ATRX	TAGTCTAGCTGCAAACACCA	TGAATTCTATACGATCAAGG
TATTTCGATTTTTGTGGCCTACATT	TEDH-1006460	ATRX	ATCGGAGCTTAAACTCATGG	GACGAAAACGTATTGCTGAG
GTTAGATGGTTTTCATGGTGTCTTA	TEDH-1006462	ATRX	AAGGGTGTAGTCTTTACACG	CAGGATCGTCACGATCAAAG
GGAGCGGGATCACCTGGGGTCTAAT	TEDH-1006489	ATXN3	TGAGGAAGCAGATCTCCGCA	ATCTTACTTCAGAAGAGCTT
TCTAGTTATGTTTGAGCTGCAGGGA	TEDH-1006490	ATXN3	GTTGGACCCTAATCATCTGC	TTGGCTCAATTACAACAGGA
AGGGTGTGTACGTTATTGTAAAGGA	TEDH-1006493	ATXN3	TACTTAGCTGAATAGCCCTG	AGAAATGATTTGAAAACAGA
GTTGCAGTCCGTACCAGTTCGAAAT	TEDH-1006500	ATXN7	TGCTGAGCAGGGCAGCCTGG	TTATCCAGTGAGGAGGGCGA
AACCCGTACATGTGATCGACGAGAA	TEDH-1006501	ATXN7	GCGGGATGCGGGTCCCTGAG	AATGTCCACATGAAACACAC
CTTGCGCCCCACGTTTGAGATGCAG	TEDH-1006502	ATXN7	CAGCAAAGTAGAGTTCCCCA	CACCCGGTCTTTGACATGCA
GATCAACAAACCGGTTCTAGGGACA	TEDH-1006532	AUNIP	ACGCGGCGGCGCTGAAGAGG	TGAAGATTCTCAAGGCCAGC
CCGATCAAGGAGTAGCCAACCAGGC	TEDH-1006531	AUNIP	CGGCGTGTGGCTGGACGCGG	CTGAAGATTCTCAAGGCCAG
GATTAGAGAGGCTTCGGCACGCGAA	TEDH-1006533	AUNIP	CCAGAAGTCTGGAGGGACTG	CAAGACTAAATTGGAAAGAA
GAAGGAACAGTTAAGGCCTGTTCAG	TEDH-1006837	BABAM1	GCACTCGCTCCAATCCTGAA	GGTCCAAATTCGGACACCAA
ATCATCTTGCGAGGAAATTGTAGGA	TEDH-1006835	BABAM1	GGAGGAGGAGATGAGTTGGA	ACTGGGGCTGGCAAGGTGGA
CATGTTGCTCAAGCTGGTGAACCCT	TEDH-1006836	BABAM1	GGTCAACTGTCCAGAGAAAG	CCTGGAGTTGCACAACTGCA
TTCATCGTTACCAATCCGATCAGTC	TEDH-1006838	BABAM1	CATGGGCAGCCTGGATACCA	CGCACTCGCTCCAATCCTGA
GATATCCAGCGGCAGATGACTGAAG	TEDH-1006963	BAP1	AGTGGACAGACAAGGCCCGG	ATGGGCCTTGGCCAACTCCG
AGTTGTTTAGGTTGTCTGACCGTTT	TEDH-1006964	BAP1	TGTCACCTCCCACATCTCCA	TGATGGACAGAGGAATTGAG
CTGAGCCGTGGGCTATATCTTGGTT	TEDH-1006965	BAP1	ACCGAAATCTTCCACGAGCA	GGTCTCCACTAGGGCCCTGG
GGCGGTTGCGGCCACAAAGTGCGAT	TEDH-1006969	BARD1	GTCACGTCACTGTCTGGCTT	AGCGCAGCAGCTTCTCCAGG
TGTTTCAGGTTGCATAGAAAGGAGC	TEDH-1006968	BARD1	GATCAGAATCGGGTCTCGCA	AGCTGCTGCGCTGCTCGCGT
CGCGTTATTTGGTTAGACTGGTTGT	TEDH-1006967	BARD1	CAGTCTATAAACCAGCTCGA	GTCCTTTGGATGGTGTTTGA
TTGCCCTAGATGAGGATACGGTCGG	TEDH-1006966	BARD1	TATACTGAGTTTGACAGTAC	GTGTAATTATCACCCAGAGA
ATTTTGTGTTATTGCCCATGAATAC	TEDH-1007017	BAZ1A	ATGTGGAATACTTAAAACAG	TACATGCGGTCGCGACCCAA
GAGTGTTCAGTCTGGACAATTTGAA	TEDH-1007019	BAZ1A	TGACTGTTCACTTGACTTTG	TGTGAGACAGAAGCCGCCCG
AGATTGCCAACGGTTTAAAGGCTCT	TEDH-1007020	BAZ1A	TCTACCTCCAACATTGACCA	TCTTCCTCATCAGCAGTAAG
GTGTTTAATGGAATGTGCTTTAAGA	TEDH-1007016	BAZ1A	AGATGAGCAAAGAAATTCAA	GACCCAGGATCACATAAAAG
AGCCTGGTGGGACACCAATACCAGA	TEDH-1007025	BAZ1B	GCCAGGTGCTTCAGACCAAG	TTTCTTTGTAGTATGCAATG
AGGAACTACTTACTGCCTGTGGAAG	TEDH-1007023	BAZ1B	AGAGGCCGTTGGACAGTCCA	CAGCCATGTGCTAAGCTGCA
CGTATCAATGGGCGGAGGATGGCGG	TEDH-1007024	BAZ1B	TGAATGGACAGAAATCCACA	ACTTTGTTGGATATGGCCAA
ACCGCGGTCCACTACCCTTATTTTT	TEDH-1007021	BAZ1B	TCAGGAGGCCTTCCGCACCC	TGATGTGATCACGCACCCCA
TACCTATAGACGGAGTAGGTGCGCT	TEDH-1007135	BCAS2	CTGGAACTAATGTCACAGCA	TCACCGCTTCCCGCACACCA
ACCCTTGATCGACCTAAGATTCATA	TEDH-1007131	BCAS2	TTATGAAGCCCCTGGTGTGC	AATTAAGCAGCAACATGGAG
CGTGGTTCTTGCAGTCGGGCTGCCC	TEDH-1007134	BCAS2	CTCACCGCTTCCCGCACACC	ACCTGAGGTCCTCAGAATGG
CCAGCACATTTGCCCAGTGTTCAGC	TEDH-1007132	BCAS2	TAACTGCTTGATGCTCTAAC	GTTATGAAGCCCCTGGTGTG
GGCGAACCTGTCGATTTCAACTATG	TEDH-1007133	BCAS2	TGGATCTAAATTGAGAGAAA	TAGCTCAGGTAGTTCTTAGT
TCAGCACTAAGAAATCAAACATTGA	TEDH-1007160	BCCIP	GCGGCGTGCCGTGGAAAGTG	CACAGAACCAATAAGCCATG
TAGGAATTCTTATGTAAATTAAAAT	TEDH-1007158	BCCIP	TGTTGAACAAATTCAAGAGT	GCCTTGCAGGAAAGAACTGG
TGGCAGCTTTATCCGACTTGGTGTG	TEDH-1007159	BCCIP	CGTCATAATCATTATCTGAT	ACATGGCGTCCAGGTCTAAG
AGGTTAGGTTGAATACTGTTTCTAC	TEDH-1007157	BCCIP	TTGAATTTGTTCAACACACT	TTTAAATTTAACTGAAAGAA
TTTGTAGACGTGAATAGACAGGAAC	TEDH-1007297	BCLAF1	GGAGGAGGTAGATATCATCG	ATACATACCTGTGTATTTCA
CATAAGCGCGTGGTTGTAGGTCGGG	TEDH-1007296	BCLAF1	GGTAGAGGGTATTATCAAGG	GGAAGCATACCCGTTTAGCA
GTGTGTCGAGATTGGTAGGTAGTAA	TEDH-1007388	BEND3	TCTGCCCGACGACATCTCAG	GTATCCCCAGCATCGATGAG
ATTCTTTAGTAGGAATTTTGTAACA	TEDH-1007387	BEND3	CGTGCAGCAGAGCCTCTCCG	GATGTCGTCGGGCAGACTGG
TTTGGTAATAACCTCCTGAGCTGAG	TEDH-1007389	BEND3	GCTGCAGTACAACCATTCCG	GAGGAGGCGGCTGATCCCCG
TGGGGAGTCGTTATTCAATTCTGTT	TEDH-1007386	BEND3	GCGGGACTGTGGCAGCACCG	GCGGCTCATCCGCCACTACG
TACGGCAAGGCACCCCCCTTTCGGC	TEDH-1007385	BEND3	GCAGCTCATCCGCAACTATG	CGTGGAAGCCGTCTACCCGG
ATTAGGCAAGATTTTTGTGCCTGAG	TEDH-1007621	BLM	AAAAGATGCCAGCCTCCCAA	GAGAAACAGAATTTGAGGGA
TCTTATTCCATATTGTATCAGCGTT	TEDH-1007622	BLM	ACCCCAGGAGAAACACAGGC	GCTGGACAGGCTTATCCCTG
AATTCAGGATTTTGGGTTCTCGTGG	TEDH-1007624	BLM	ACTGGATCCAATGATGCTGG	CAGAAGTGGATTAATCAGGA
GCTTGAGGTTCGAGCATGAATTGAG	TEDH-1007625	BLM	CTACAATTGCATTTGGAATG	TCTACGATAAGTGATCTCAA
AGAGGGGACGTTTGGGGTCATGGTC	TEDH-1007689	BMI1	ACAAAGCACACACATCAGGT	GGAACCAGCAACAGCCCCAG
GGGCAGCTTATGTGGCCAGGGGGAA	TEDH-1007686	BMI1	CCAGACCACTACTGAATATA	CTACATTTATACCTGGAGAA
CCTTATGGGCGCGCTCCTCTGCGGG	TEDH-1007688	BMI1	GTGGTCTGGTCTTGTGAACT	TGATGTGTGTGCTTTGTGGA
CCCGGATGCAAGCGGTAGTAATATT	TEDH-1007827	BOD1L1	AAGATCCACCACCAGATCAG	TCTTGCCTCAACCAGCAAGG
GTGCCAAAGGATGTTACCAAGCCGG	TEDH-1007828	BOD1L1	GAGTGCAATGGACAGCACAG	CCACCAGATCAGAGGCTCAG
GTAGCAGCGCACGGCATCCAGGACA	TEDH-1007830	BOD1L1	ATAATTATTAAAAGGAAAAG	GGGCCAGCCCCGGGGCCCGG
ACTCAACTATCAGACGTCCGGCACT	TEDH-1007829	BOD1L1	CCAGAATAGAAACAGCACAA	GTTCCTTTGGTGTAAAACAG
GATCTGACAAAATCCGGTTTGATTA	TEDH-1007936	BPTF	TCTGAGAGTAGAGTAGTAAG	AATTTGGTATTACAGCACAA
TTAGGGCGTCACAGTAGGGCAAGGA	TEDH-1007935	BPTF	GCCTTCGATCAAGTGCACTG	AGGACAAGTGAAGCTCACCA
CGACTTTAACTTTGTGAAACGGCGT	TEDH-1007937	BPTF	GGGGTCTCACCTGTAAGGAA	GGTATCTGAAGAGATGTATG
TGTCTGGAGTAGCGATTGAATCTAG	TEDH-1007958	BRAP	GGAATCTCAGCGAATCTACT	CATACCGTCCACATCCTATG
GCCTGTTATCATGGCATGAGGCAGT	TEDH-1007957	BRAP	TCGATGGTTGGTAAGCTGCA	GTCACTGGTTGTTATCCGAT
ATTTATTTTAATGTGGTAGCTCCAC	TEDH-1007961	BRAP	GCAGAACAAGCTAAAAGAGG	CTTTACTTCTTTGCGCAGTG
TGCAGTCAGGGGTGGCTGGACCGTG	TEDH-1007963	BRAT1	ACTGAGGGCTCTCTGCCACG	GCAGGAGCACCCCTGCCTGG
CATAGAGTTTGACTAGTCTTACTTT	TEDH-1007966	BRAT1	GGCCGAGAGCAGCGACCACG	CATAACTCTCAGGGTCCTGG
CACCTGCAGCTCGCAGGTGAACCGG	TEDH-1007971	BRCA1	TCAGAGTTCTCACAGTTCCA	AATCACCCCTCAAGGAACCA
TTACAGCAAATATAACGCGGTACAC	TEDH-1007967	BRCA1	GGTCAACAAAAGAATGTCCA	GAATGGATGGTACAGCTGTG
AGTAGACGTCAGTCAATCCGGCATA	TEDH-1007968	BRCA1	AAACTTACTTGCAAAATATG	AATTGACAGCTTCAACAGAA
CTTTATGGTCAGAGCTCCGTTTTAA	TEDH-1007973	BRCA2	ATCTGGCCAGTTTATGAAGG	ATATATGTAAATGTAGTATA
GAAAGTCAGTCCGGACGTTGTCCGC	TEDH-1007974	BRCA2	AATGGACATTCTAAGTTATG	CGAGGCATTGGATGATTCAG
ATCCTGTTGCATAGTTTTGGCTTCT	TEDH-1007972	BRCA2	CAGTCTACTCAAGAAATCCA	TGGGGCAGCTGTGATCTCAA
GAGATGGTACGGTGAGTTCCTATTC	TEDH-1007975	BRCA2	TGGAAGTGACAAAATCTCCA	TCTGGCCAGTTTATGAAGGA
TCCGAGCGCGCGGCTGAAGGATTTA	TEDH-1007977	BRCC3	GCCCAAGATCCTGTGCCAGG	GTTCTTATCTTCTATGAAAC
GGTCGGTTGTGCCGTTTGCGACGGC	TEDH-1007981	BRCC3	CCACGCTCTGAGCACAGAGA	TTACTGAGTCCAGATGTGTA
TACATGCGTTGAATGTTTTGCTGTT	TEDH-1007978	BRCC3	TCTTACGACGTTCTGATAAG	ACTTTCCCGATAGTGACATG
GCATCATATCGTGTCTGGTAAGGTG	TEDH-1007986	BRD1	ATAGTTTCGTCAATACCAAG	GGAACATCCCTCCAGCCCGG
CGTAATCGTTTGGAAAGCCTCCATG	TEDH-1007982	BRD1	GCAACAAGGAAAACAGCGAG	CTGATCGCGCAGCCTCACCG
TTCCGCGTAGGTCGGGAGGCCGCTT	TEDH-1007985	BRD1	CGGGGTGCCCTACATCCCCG	GGGCTGCGCAAATATCCTGG
CGTCATATGAGTCCGCTTTTCTGTC	BRD2_1	BRD2	CGACCACTCTCTCTACGCAT	AGCTGGTTGGTAACTCGTCC
CCAGCGCATGTGTGGAAACGGTGGG	BRD2_2	BRD2	TCATCGCTTAGCAGAACTAC	ACAGTGGTAGGTATCTCAGG
AGCCACTATGCAAGCCGTTGGTGTA	BRD2_3	BRD2	GAGTCAGGCAAGTCTTTGCG	TGTGGAAACATCAGTTCGCA
TTGGCGCGCTAGCGCGTGTTTGTTA	TEDH-1007994	BRD4	AGTCGAACTGTCACTGTCCG	CTTGGTGGTCTTGGGCTCCG
TACATGGGTATGTGATGGCATCTGT	TEDH-1007996	BRD4	CTTGGGCTTGTTAGGGTTGG	TCTTGGCAAACATCTCCTTG
ATAGAGGTGTCTTATCCGGCTAGGC	TEDH-1007992	BRD4	CCACCAAGCTGGGCCAGCGG	CACGTCCACAGGCTTGTAGA
CCTGGGTGGCGTTTAAGCTGGAGAG	TEDH-1007995	BRD4	GCTATGTCACCTCCTGTTTG	GAGCCACCCACCCATCATCG
GGGGCTCGGCAAGCCAAGTCAAGTA	TEDH-1007999	BRD7	AGGCAAGTCTAATCTCACAG	CGCATCGTGAAGGAATCTGG
TCAACTTGATTTGGTGAAGTTTATG	TEDH-1008001	BRD7	TCTGGAGTGAATACTTTGCA	TTGGCTAAAGAGCTTGTGAG
GCCTTCCAAATTACTATTTATATGA	TEDH-1008000	BRD7	GAGACAGATCATGTTCGGAG	TACTTTGCAGGGGTTCAAAG
GAGCGGTATTTACCCCTTGACACCG	TEDH-1008002	BRD8	TGGAAATATACTCACCCCAG	TTTGAGGAAACGGAAAACAA
CGCGCGTATTATCAAGGCTCGTGGT	TEDH-1008006	BRD8	CCTTCCCATGATACATGGTG	TATCTGCTTCAATGGCACAG
TTGGTCATCCCACTGCATTTAAGCG	TEDH-1008003	BRD8	TGTTTGCATAATCAACTGCG	AGGAGAGCGAACCATCACAG
CTTGACAAGATGTGCTGTTTATGGA	TEDH-1008012	BRDT	CTAATGAAGCCTCCTCTGAA	CTGAATATAAACAAACTCCC
GAGAGCTCCGTTGAAAGTGGTGAGG	TEDH-1008015	BRDT	GGATTGGAATTGCTCAGAGA	AGGTGTGGTCTGATGAACAA
TGCTTGGACCTGTTCATTTTTGTGG	TEDH-1008017	BRE	ATTATCCGTACAGCCCCAGA	ACGGACTGAAATGTGAGAGT
TAGTTCTACCCTCTTAGCACCAGTC	TEDH-1008018	BRE	TTATCCGTACAGCCCCAGAT	TGAGAGTTGGCTGGTCTCGA
GACTTGTCAAGTGTCCAGCCACGCC	TEDH-1008019	BRE	ATCTTCTCCAAAGATAAAAT	TGTCCTTTCAGTGCACTTGG
TGGGCTGAGTCTGGTGACGGCGGTT	TEDH-1008062	BRIP1	TGTCGTGGTAAAGTGAGTGA	ACAAACAATGACATGAACCA
ACCGCACAAGTAGATAGTAATGTTT	TEDH-1008064	BRIP1	TTGTCGTGGTAAAGTGAGTG	CTGTGTTCATAGATTCTCAG
CTTGTCCAACCTTTAGTTGGATCTC	TEDH-1008063	BRIP1	AGGGCTTCTTCAGAACAGAG	ACAGTCATTGTAGAACCACA
GTGGGGGAGGGGCCGGTGGGGGTCG	TEDH-1008066	BRIP1	CAGTATTCCTGGAAGAAGCA	AGTTACCGACTACCTCAGGA
GGATAACCGTACGGGCACCTTTGAT	TEDH-1008065	BRIP1	TCATCATAGCAAGCTGTGAC	ACCAATTTATGGTAAAGAGG
GTGTTGGGGGGTTGTGCATGTGGCC	TEDH-1008274	BTG2	CCTCATAGGGGTCCACCCAC	CCCCTCCAAGAACTACGTGA
ATTCATGTCTCATGGGATTGGAGAA	TEDH-1008273	BTG2	GTTTCCCGAAAAGCCGTCCA	CATCTGCGTCTTGTACGAGG
CGTTTAAAAAATTCAGTCTGTATTC	TEDH-1008272	BTG2	GATGGACCCCATCATCAGCA	GCCGCGCGCGACATGAGCCA
CTTGCTGTTTCTGTCTTTGACCTCA	TEDH-1008276	BTG2	GCAGGTGAGGAGCCCACAGG	CCTGTGGGTGGACCCCTATG
ATCGAGTGCCTTGGGTACGTCGCCA	TEDH-1008360	BUB1B	AAAACCCTACTCAGTCACCA	GCTTGCAGCAGAAATGAATG
GGTGATGTATAGGCAGATACTTCGC	TEDH-1008357	BUB1B	ACCTATCCCAAACATCCAGA	AGAGAAGATGATGTATTGTA
ATCGGCTTGCATACAGAGTGAGTAA	TEDH-1008356	BUB1B	CAGATGCGATATTTCAGGAA	ACAGTCTCTCAGGATCAGAA
CTCGCTGCCTCCGCGACCGCCAGTT	TEDH-1008431	C10orf12	GGGCCGGTGAATCCTCTTCA	CAGAAAGTATTGCTTGTAAG
TGACGCAAGCTATGTAGGCGCTCAT	TEDH-1008435	C10orf12	CAACATCGTCCTCATCTAGG	TGATATAAACAACATCACAC
TGTAGGTCTCCACAGGGTAGAGTTG	TEDH-1008432	C10orf12	GAGCAGCTCCCCTAGGTCAG	ATCACCTCTCACGAGGAAGG
AGTATTCTTTTTTGGAGATATATTT	TEDH-1008433	C10orf12	ACTGTTCGCACAGCAAACGG	AAGAGTACTGAAGGAATGAA
TGAGGTGGATGTGGGCGTTTTGATT	TEDH-1008434	C10orf12	CCTTGTTCTTACTATCTGGA	GGGAGGGCAGCTCTTCCCAG
CGTATTGATCTACCAGTCCACCGTG	TEDH-1008565	C11orf30	ACCTCTACCCCTGTTCCAAG	GCAGGACATAGACAGTAGCA
GGGAAAGTTTGCGGAATACCTAAGA	TEDH-1008564	C11orf30	CATCCCTGCTGAGATCCAGA	CCATCCCTGCCACCACCATG
GACGCCATGTATGTATGACGCGGAG	TEDH-1008566	C11orf30	AACAGCCTTCCCAGCCCCAG	AACCCTTCTGGATCTCAGCA
ATGCGCTGGTCTAGTGGCTGGAATG	TEDH-1008949	C15orf41	CTTTGTCCCTTAGCTGTAGA	GACCCTTCTCAGATTCCAGA
GTGGCGGTGCTCAGCAAGGAGGGAG	TEDH-1008951	C15orf41	TTTGTCCCTTAGCTGTAGAA	ACTGGTCATGCAGGTAGGCG
AGTTTTATTTTATAGGCCTTTATGT	TEDH-1009207	C17orf70	GGCACTGACAAGCCTCAACG	CGGGGCCGAGCTGGTCCACG
CGTATTCTGTTCTCATGGCTGAAGT	TEDH-1009209	C17orf70	CGAGCCCGCCGTTCTCACCA	GCGCGACCGGCTCTGCACGG
AGGACTACCTCTCATGTAGTCTTAA	TEDH-1009344	C19orf40	TTACTCAGTTGCTGGATGCT	AACTCCTGGGATCTGCTGCA
ATTAACGCGTGCGCGCCCCATCTGA	TEDH-1009343	C19orf40	TGGAATGGTGCTGCTTCCAG	CGAACCGTGCAGCAGATCCC
TTCAGTCCTTGCGTACCTGTCCCTT	TEDH-1009347	C19orf40	GCTTCCATCTGGCTGGCCAC	TGGAAACTTCTGGAGGAGAA
AATGTGCCGTCTACGGAAATGCCCT	TEDH-1009345	C19orf40	TGCACGGTTCGAAGGAGCGA	GCAGGTGGTCGGACAAGCAG
AAGCCTTGTCTCTGGTGGTGTGCGT	TEDH-1009608	C1orf115	GGACGAGCGCGGCGGACGAG	TACGTGGTCATCGGCCTGCA
ACGACACATGTCTTTTTTTGTAGGG	TEDH-1009609	C1orf115	CTAACACTAGAATGTCGGGA	CCTGGAGCACCTGGAGTACG
ACTTATGTCGGTCTCTAGAGAGCAC	TEDH-1009611	C1orf115	CCGAGGGCGAGGGCGAACCG	CATCAAAGGATGCCGCTACG
CATCGCCTGTTTTCTGAGGGGGGGA	TEDH-1009821	C1orf86	GCACACCTGTCCTGGGAAGG	GCACATGGGGCAGCTGCGCA
CGGTGTGAAGGGCCTTGACGTTCTT	TEDH-1009820	C1orf86	CTGGGCCGAGCTACTGCGCA	CCTTCACTGCCCGCCTTCCC
TAGGCGCTTGCGGAGCTGTGTTTAA	TEDH-1009817	C1orf86	GGGGCAGCTGCGCAGGGCCG	GGGGCCCGGGCCGTTCCTAC
AGCGCGCTTGCCTAAGGGACACCAT	TEDH-1009866	C20orf196	CTTCCTCCAGTGGGTAGAAG	CAGAAAATCACTCAACTAAG
AGTACTGGAATGATGTTCGGTCTTT	TEDH-1009863	C20orf196	CCCGGGCCATTTGAAAACTG	CGTCTTACAGAGGCATTCCA
TCGCACAACCCACATTGGTCCTCCG	TEDH-1009862	C20orf196	GTCCCGGTTGAAGATCACCC	GGACACCCACTTCTACCCAC
GTTGTGGATTGCAGATTATTTGGCT	TEDH-1010311	C4orf27	TAATAAAACTCAGTACCACA	GATGAATGTGATTATGGCAT
TAGAGAGGGGTGATATCGTTGAGGC	TEDH-1010308	C4orf27	ATGAATGTGATTATGGCATG	AATAAAACTCAGTACCACAT
TTTCTGGCTTGATATATGGCATTAT	TEDH-1010307	C4orf27	ATAATGGTCTGGAACTCAGG	GACCAACTAATTGAAGTCCA
ACGATGATTTTTGCGAAGGAAAACT	TEDH-1010616	C7orf49	GGAAAAGGCCTGCGAGCAGC	CCGGCCTCTGGGAAGGGCTG
AGAAAGAGGCCGCGATAGCAATCCG	TEDH-1010618	C7orf49	GGGCTGTCAGCCATGAGGGA	CAGCCCTTCCCAGAGGCCGG
GAGAATTAAAACGTACTGTCTTGAA	TEDH-1010619	C7orf49	CGCCAGGGCCGGCTGCTCGC	CTCATGGCTGACAGCCCAGG
GACGCTAATTTGGTAGTGTACTATT	TEDH-1010617	C7orf49	GGACAGTGGGAAACAGGCAC	TACAATCCGAGACTAAAACG
AGTGGGCGAAGGGCTGACGAGTGGT	TEDH-1010620	C7orf49	TACTCCACAGAGCCGCAAAC	ACAATCCGAGACTAAAACGA
GGGGGGGCAATGATGGGTAACGTTA	TEDH-1010850	C9orf142	CTCCAAGGTACCAGGCCCAG	TCGCAGTAGCACACGAAGCG
CTAAGGGTAAAAGGGGGTGAAAAAG	TEDH-1010851	C9orf142	TACCTGCCAGTCGCCGCTCC	ACTGGCCTTTGACCTCTCCA
TGTGGGGTCACTGTCGATTTTCATG	TEDH-1010852	C9orf142	TAAGAAACCAGCTGGTGGCG	GCAGGTGCTCCAAAGCTCCG
TAGTGGTCGGCCCGGTGGTGGAGAG	TEDH-1011550	CAND1	GAGTTTGCTTCAAAAGAGAA	CCAGCCCTAGACTTGCAGTG
TTCTATCAGGGAGACTATTATATGA	TEDH-1011548	CAND1	GGAGTTGCATCAAACGAGGA	CCAACACAAGCCACCACTGG
TCAAATAACAATCTATAATTAGGTT	TEDH-1011547	CAND1	TTTATAATGGTAGAAACATG	CAAACGGCAGATATTCAGGA
TGAAACATAGGCTCTATACAATGCT	TEDH-1011546	CAND1	CAGAACCCAAATTGTCTCCA	CCTATGCAGTTCTTTAACAG
GCGGGCGTAGGCGTTTAGTGAGTCT	TEDH-1011549	CAND1	AACAAATAATTTAGGATACA	TCCTCCCTTTCAAAGATAAG
AACTAGTAACGTTGATGTTGTGACA	TEDH-1011861	CASP3	CACAGTCCAGTTCTGTACCA	GTCGGCATACTGTTTCAGCA
CGTAGTGAGGTTGGGGGCCCCACCG	TEDH-1011859	CASP3	AATGGACTCTGGAATATCCC	TCTTACCCGGGTTAACCGAA
GCAGGGGTGTATCGCGGACCCAATG	TEDH-1011860	CASP3	GGCGTGTCATAAAATACCAG	AAATTATTCCTTCTTCACCA
ATTGCTGTCCGTGGCGGCCTGCCTT	TEDH-1011863	CASP3	GTGTCATAAAATACCAGTGG	AAAATGGATTATCCTGAGAT
TAGCTAGGGCTGATTTGTGCAAAGT	TEDH-1012084	CBX1	ACAAAACAAGAAGAAAGTGG	GGTTGTCATATCCTTCTATG
TCTGAATGTCCTACAATACGCTACC	TEDH-1012087	CBX1	CTTTGCCCTTTACCACTCGA	GTTTCAGTGAGGACAACACA
GCATAGCAAGGAGTGCCCCGGCTGG	TEDH-1012088	CBX1	GAAACTCAGCAATGAGGTCG	CTCGAGGTTTGGAGCCGGAG
AACGGAGGCGAGATGTGTGGCACAT	TEDH-1012096	CBX3	AGACTTGGTGCTGGCGAAAG	ACGTGTAGTGAATGGGAAAG
TCCGTACTTGGTTTGCGCTGACGTT	TEDH-1012097	CBX3	CTAGATCGACGTGTAGTGAA	AAACCAAGAGGATTTGCCAG
GATTAACGCGGTTGTTTCCAGAAGG	TEDH-1012098	CBX3	AGATGAGGCAGACTTGGTGC	AAACAGGCTGACAAACCAAG
ACATTTAGGGATTCAGCAATGTTTC	TEDH-1012101	CBX4	CAAGCTGTCCCCGACCAAGG	CGAGAAGAAGCGGATCCGCA
TGTGCACGTAGTTCCCTACATTAAG	TEDH-1012099	CBX4	CAGCTTGGCACGGTTGTCAG	GCTCGCCGTGGGTCTCGGAG
CATGACTGGATGTAAGTGGTAAAGC	TEDH-1012103	CBX4	GATCGTGATGAGCAAATACA	CTGCGTCAAGACGCGCAGCG
TTTAAGTAGTTGTCGTTCGCCGCCG	TEDH-1012102	CBX4	GAGGCAGCGCTTGCGCACGT	TACTTGCCGCTCTTGCCCGG
GGATTGTTCATTCGCGTACGGGCTC	TEDH-1012105	CBX5	AGAAGTCAGAAAGTAACAAG	GACATGGCATGCATATCCTG
GTAGAGCCGGCCTGCATACAGTTAT	TEDH-1012104	CBX5	GGGTGAAAATAATAAACCCA	TAAATTCAGAAATTAGCTCA
GACCCTCCAAACTTTCTAATATATA	TEDH-1012108	CBX5	ATTGGGGCAACAGATTCCTG	ACATGGGAAAGAAAACCAAG
TTGACCTAATTTCTATCTGTCAAGT	TEDH-1012106	CBX5	CAGAGCAATGATATCGCTCG	ATTTAATGTTCCTAATGAAA
TGTTGTAGTTTGGTCATTTAAGAGT	TEDH-1012107	CBX5	GGATGAGGAGGAGTATGTTG	GGAACCAGAAAAGATCATTG
GTGGTTGAGGGTAGCTCTCGGGCAC	TEDH-1012181	CCDC101	AGTCTCTGTTGGAAGAGAGG	CATGGCCGACTGCTGCAGCA
CTAGGTTAACTCCACAGTTCGGTAG	TEDH-1012182	CCDC101	GCGGGAATCGGCAGACACGA	CCACTGCTCGTCCCCATCCA
TTTAAGGGATAAATCTAGGGAATCT	TEDH-1012180	CCDC101	GCAGGTAGTCTGGGGATACA	CCAGGCTTCCCGATCCACAG
GTTACCACTTGGCATCTACACTCTG	TEDH-1013095	CCNA1	AATACCCTGTAAATGCAGCA	GAACTGCAGGTGGCTCCATG
GCAAGCTCACTTCGCAGTGTGGCTA	TEDH-1013098	CCNA1	TACATGGATGAACTAGAGCA	AGAGGGAAACTGCAGCTCGT
TGAATCCTTACAGTCTCTTAGCTTC	TEDH-1013099	CCNA1	TTATGAAGCTCACTCAGGCA	AGATGAATCTACCAGCATAG
TCTGGACGCGTATCGCTGTACTTCG	TEDH-1013097	CCNA1	CTGAAGGAGAAACTGGTTGG	GCAAGGGTTTGACATCTACA
GTGCAAGGTTCCTGGACATTGAACG	TEDH-1013101	CCNA2	CTTCAACTAACCAGTCCACG	CTGAAGTCCGGGAACCCGCG
GAATTGCATTTCTAAAGGTGAGTTA	TEDH-1013100	CCNA2	GCAGCAGACGGCGCTCCAAG	ACTGAAGTCCGGGAACCCGC
CGAAGGTCGACCAAGCGCAACATGC	TEDH-1013103	CCNA2	TCTTCCATGTCAGTGCTGAG	TACTGAAGTCCGGGAACCCG
TTTTGCATCCAGGCCGGTTCGCTGC	TEDH-1013104	CCNA2	GGTATGTGTGAATATCCTCA	TGTGTAGAGTGCTAAATGAA
CATAGCGTAACTTCTGCAGGTTTAT	TEDH-1013102	CCNA2	TGCTGCTGCGCTAGACCCCG	GCAGCGCCGAGCCCGCCTCG
CGAAGGTACGAAAGGCGTTGCGAGA	TEDH-1013105	CCNB1	AACTATGTTGGACTATGACA	AGAGCTTTAAACTTTGGTCT
AGGCCCGTTACGGTGCTCTTAAAGT	TEDH-1013108	CCNB1	CTCTACCTTTGCACTTCCTT	GATCTTAGCATGCTTCGATG
GCTATAAGCGTGGCCCCACTCCTTA	TEDH-1013109	CCNB1	AAATTCTGGATAATGGTGAA	ATTCTAAGAGCTTTAAACTT
GTTTCGGGAGGTCTTACAAGTTGTG	TEDH-1013117	CCNB2	ACGTAGTCACTGCAGAGCTG	GCTCGCCTTAAGAAGTGTAG
GATACGTTTTTACCGCCGCTGGGTT	TEDH-1013115	CCNB2	GGTTCTAGGACAAGGAAAAT	GCTCTTGGCTTCCAAGTATG
TTCCGTTGGTTTATATACTGCTCGT	TEDH-1013118	CCNB2	GAGACTCTGTACATGTGCGT	GGCGTCGGAGCAGCGCCATG
TTTAAACAAGGCTAATTAAGCAGGA	TEDH-1013119	CCNB2	GGAAGAAGCTTCAATTAGTT	AAGGCGAGCATCAAAAGCCG
TCGTCGCTGGACCGGTTTAAGAGCT	TEDH-1013120	CCNB3	AATGAAGGCAGTATGCAAGA	TCCGAGCTTCTTCATGTAGA
GGGTGATCCTTTTCTATGATTAGAT	TEDH-1013124	CCNB3	CATGTAGAGGGCCAGGAGTA	GCCACTGTAATGCTCCAGGA
GGGAGTAGCCAGTGGTCCGAGCGCC	TEDH-1013123	CCNB3	TAAGGAGGCAGCAGCTAGCT	CCCTTCCTGGAGCATTACAG
CAATGTGGGTCGGCTTTCGGGCACG	TEDH-1013122	CCNB3	GCGCAGAAAATGGTAGGCGA	GTAGAGGGCCAGGAGTAAGG
CTCTATTATGGATTGCAGGGTCAGT	TEDH-1013121	CCNB3	AGCTGCTGCCTCCTTACTCC	CGCAGAAAATGGTAGGCGAT
ATGCTATCTGGATGTCTTTAACGGA	TEDH-1013126	CCNC	ACCTTTGCTCCAGTATGTGC	ATACCTAAAGCTATCATGAA
GAAGATCGGCGACGGGCCTGCATTG	TEDH-1013129	CCNC	CTTACATGATTCATCCTATA	GTACAACACAGGCTACATGT
GTGCGTGCTGCACCTTATCGGTATC	TEDH-1013125	CCNC	TCTGTTCTAATTACCATGCA	TTTCGATGAGAGAAAAGAGA
CGTGTTGGCTACAGAGGGCACCATA	TEDH-1013128	CCNC	AGTGAATGATACCTACAGAA	ATCTTTCTGCTGTACAACAC
AGTGGTGCTAATCGTCACTAGCGGT	TEDH-1013134	CCND1	GATGTCCACGTCCCGCACGT	GTAGGACACCGAGGGCGCGC
TTTCCGTGGGGGCTGTCCGTTACGG	TEDH-1013131	CCND1	GAAATCGTGCGGGGTCATTG	GGTGGCGACGATCTTCCGCA
TCCACAATGGATATCGGTTGCCGTA	TEDH-1013133	CCND1	TGGTTTCCACTTCGCAGCAC	CGTGCCTCCGTAGGTCTGCG
CAGCGGCATAGTATACGTTTTTCTG	TEDH-1013132	CCND1	GGTCTCCTCCGCCTTCAGCA	GATGGTCTCCTTCATCTTAG
TTATACGCGTGCGGTGGAGGGTAAT	TEDH-1013138	CCND2	CGAGGTGGACCCGGTCCGCA	ACTCCCATTATAGGTCTGTG
TGAGTTTTAATTGTAGTACCGCGCT	TEDH-1013139	CCND2	AGAGACCAGCCCGCTGACCG	CATGGAGCTGCTGTGCCACG
TTTTAAGGTGGATGGGTCGAAAGCG	TEDH-1013135	CCND2	CCAACCCTACATGCGCAGAA	AGCACCCAGGAGTTGCAGAT
TATGATTAACACGAGCGTATTTTGT	TEDH-1013136	CCND2	ATGTGCTCAATGAAGTCATG	GAGCAGGTTGCGGTCCCGCA
GTGAAGGTCTTTGCTAGAGCTCCCC	TEDH-1013143	CCND3	GATCGCCACGGGCAGCATTG	CCTTGGCTGCTGGAGCCCCG
AAACTGTTATGGGTGAAGACGGGGT	TEDH-1013141	CCND3	GCAACTGCGCCTTTCGGGTG	GGGTGCCTGCTCCATGTCCG
GTCCTGAACCCATACGTAGGGTCAT	TEDH-1013142	CCND3	GGCTCTTACCTGTAGCACAG	CCGTGGCGATCATGGATGGC
ATGGGCTTAGTCCCGGTTAAAGATC	TEDH-1013152	CCNE1	CTGGATGGTGCAATAATCCG	GACACCATGAAGGAGGACGG
TGGCCCATAAGCTAGATAACAGAAT	TEDH-1013150	CCNE1	AGGGCTTCTCCTCTCCCCAG	GGAATTAATGATTATGAAGG
CTGGTCTTACGGGCTGCAGGGACGT	TEDH-1013151	CCNE1	AATGGCCAAAATCGACAGGA	AGATGACGAGAAATGATACA
AATCTTGGTAGACAATGCTCAGGAA	TEDH-1013178	CCNH	AGTTTACCTTTAAGTCGATG	GTCCAAGAGGACTCTCCCGG
ACCTCGTCGCGGCAGGGGAGGATCG	TEDH-1013177	CCNH	ATACTCACATTATTATCCTG	CAAATGGTCTGTAAGGATTG
GACCTTTAGCGCGGCACATAGAGAA	TEDH-1013179	CCNH	CGGAGGTTTCCAACAAACTG	AAGCCCTCAAATGGTCTGTA
TCGCGAACTGGGAGGTTGTGCTCAT	TEDH-1013176	CCNH	AAGGTTATTGGAATTCTGTT	AATCCTTACAGACCATTTGA
ACCCCTCAGCCGTAACCTCCGCCTT	TEDH-1013215	CCNO	GCGACTGGGAGACCACCCGG	AGCAGATCGCCAGGAGGGAA
TGTAACATATGTAAAGCAAAGATAT	TEDH-1013218	CCNO	AGAAGCTGCTTCACGCGCGG	GCACTTCTCGCAGATCTGAA
AGGGGTGGTTTTGTGTACACTCACA	TEDH-1013217	CCNO	CAGCAGATCGCCAGGAGGGA	TCCTTCCCGGCAGGTGACGG
ATTATGAGATATCTGGCTGTTTGTT	TEDH-1013219	CCNO	CTGTTTGCAAGCGATGAGCA	GGCACAGCGACTCGAAGGAG
ACGGTGGTTTGCTTTGTCCAACCCA	TEDH-1013216	CCNO	GCCAGCTGAGCAGCTTACAG	GCAGATCGCCAGGAGGGAAG
GTTGTCAGCAGCGTGCGAAATCTTT	TEDH-1013876	CDC25A	CTTGCTCTTCTCCCCTGCCC	TGCATGGGCCGGTAGCTAGG
CCATACTCGGGTAAGATGAGTACAA	TEDH-1013878	CDC25A	CAAGAGCCGGACCTGGGCAG	ATTGTCCAAAATGTTCTCAA
GTTTTGCGGCTAAGCGTCGTTACCT	TEDH-1013877	CDC25A	TGGTGCATGGGCCGGTAGCT	GCTGGAGCTACACAGGGAAG
AATCAGTACGCACCTCCGGCGTCTG	TEDH-1013881	CDC25B	CTGGATGTACCATCAGGTCG	CTCACGTCTGCTCCGCCATG
CCTTCTCGAGATGACTTCAGACTTG	TEDH-1013880	CDC25B	TGGGGTAGTCGTTGACAGCA	TCATGTACAGCAAGTGCCAG
AGTTGTCTGCCATCATGAAGGCAGA	TEDH-1013882	CDC25B	GGCAGAGTGGGCCAGCCGCA	ATGGGCCGGATCACGCTGCA
GTAGACCGTGGGGCATATACTAAAG	TEDH-1013903	CDC34	AAGAGAGCAAGGGGAAGGAT	CGAGGGCGATCTATACAACT
TATCGCGGATGGGCAGATCTTGAAG	TEDH-1013899	CDC34	CTTCTACGACGACTACTACG	GGCTTACCTGACGTTCTGCG
AGGATAAGGGTTGGTCTTCTTGGTT	TEDH-1013902	CDC34	TTCGGTTCCTGACCAAGATG	CGTGGGGTTCCACCTCTCTG
AGGTGTGGGTAACAGAGTGGAGGGC	TEDH-1013978	CDC5L	GAAGTCACTCTCATGCAATG	GTTACCAGTCTCGTGCTATG
ATCCGGTCGTCATGTAGGCTAGGAG	TEDH-1013977	CDC5L	GCCTCGAATTATGATCAAGG	ATTAAGTCCACCTTTCAATG
GTATTATCGCCAGTGTCCCCCCTGT	TEDH-1013976	CDC5L	GAGAAGTCACTCTCATGCAA	AAGATTCTGCTATTCCCCGG
CTGTATCCACGTACTGGGTTACTCA	TEDH-1013990	CDC7	TCCTGGTGTACCTGCCCTAG	ATATTTCTTTCTTTGCTTAG
TATCGACGGTGAATTGCCAGTAAGG	TEDH-1013988	CDC7	ATATTCCCGTACTTCTTGAA	TCTTGTTTCCTGTGATTATG
CGGATTTAGCACGTGTTGCTGAGTT	TEDH-1013989	CDC7	GCGTCAGCAGGTTGCCCCTA	ACATACCTGTAGTTTGATTG
ATCTTGTTGGCTAGGGGTTTTTATG	TEDH-1013986	CDC7	GGCGTCAGCAGGTTGCCCCT	TGAACTTCAGTGCCTAACAG
AGTTATGCTTTTGGTATGTCTCTTT	TEDH-1014012	CDCA5	AAAGCAGGACCGGCGGCCTG	TAGCCTTTACCTCTACAGCA
TGGAATGCTTCTGGGTGTTAGCTTG	TEDH-1014011	CDCA5	TGAGGCCGAGTCCAGCTCCA	CCGCTCACCGGAGCGCTGAG
TTAAGCGACCTTTGCAATATATCCT	TEDH-1014013	CDCA5	CCTTCGGCCAGATTTCAGGG	CAAACTCACCGAGGTCCCCA
TCTACGGTTTCCTATAGTGACCTGA	TEDH-1014014	CDCA5	GAAAACGGAGCTGGATGAGT	CGGGTGGTGGGGAGATTCCA
CCTCGAGCGTTGAGGCATTTCGTTC	TEDH-1014190	CDK1	GACTAGAAAGTGAAGAGGAA	GCACTCCCAATAATGAAGTG
GACGTGGGTTGTTCGACGGCCGAAT	TEDH-1014188	CDK1	AATCAGACTAGAAAGTGAAG	GATCAATTTCTGAATCCCCA
GGCTCATTGTGTCTGTCAGTAATTA	TEDH-1014189	CDK1	TCTGAATCCCCATGGAAAAG	CAAACGAATTTCTGGCAAAA
ATTGCGAGCGTTTTATATTGGTTAT	TEDH-1014191	CDK1	ACTCAACTCCAGTTGACATT	ACACAAAACTACAGGTCAAG
TAAACCATATTGGGAGTCTATCCCT	TEDH-1014207	CDK12	GCACCAGGCCTTGAGACCAA	GGTAACTGCTGGACTCCCCA
TCAAGTGGATAAGATGCCATTCCGC	TEDH-1014206	CDK12	ACCCAAAAGTTACAAAACAG	CCAGGTAATAAGGGTGGGAG
GAGACAGTTAAGATGGCGTTCTGGT	TEDH-1014210	CDK12	CGGCGACGTCAGCGACAAAG	GGTCCATATACTCAAATACA
TCATGTTTTCATAGTATCTCATTTG	TEDH-1014208	CDK12	GCTTGGTATCGAAGCACAAG	CCACCGGGTGTAACGCTAAG
GGGCGGTACCTGATAATTTATGAGG	TEDH-1014247	CDK2	AAATCTTGCCGGGCCCACTT	TGCACTACGACCCTAACAAG
ATGGGTGGCGTGGGTCGTTAAGACT	TEDH-1014246	CDK2	GCTCCGTCCATCTTCATCCA	GGTCAATCTCAGAATCTCCA
AAAAAACGTGGGAGGTCTTGCTTAT	TEDH-1014248	CDK2	GAATCTGCTTATTAACACAG	ACAAGCCAAGTTTCCCCAAG
GGGCTTCCATATTTGCGTCACACGG	TEDH-1014270	CDK4	AAGAGTGTGAGAGTCCCCAA	CCAGATGGCACTTACACCCG
GGCGCCTTGTTCGGATTATTAGTTG	TEDH-1014272	CDK4	TCAGAGTTTCCACAGAAGAG	CAGAATCTACAGCTACCAGA
CGTGTATATGCAGGCCCAGATTGTC	TEDH-1014269	CDK4	GGCTTTACTGAGGCGACTGG	CGAGATGTATCCCTGCCCCG
AATGCTAGTTGGTTTGCGCTGGTTT	TEDH-1014310	CDK7	ATGGTGTAGGTGTGGACATG	AAGCTGGACTTCCTTGGGGA
ACCTTAGCGAGCCCGCGGGCAGTGG	TEDH-1014312	CDK7	ATACACATCAGGTTGTAACC	ATCTCTGGCCTTGTAAACGG
ATGAAGGTAAACATGGAGGAATTAT	TEDH-1014308	CDK7	TGTGATGCAAAGGTATTCCA	AACAAGAATATTTGAAACTT
CAGCGGATGCGTCACCTCAGGGTAT	TEDH-1014314	CDK8	AGATAGTAAAGCATTCCACT	CTAATGGAACTGGCCACCCA
TGTATGGTTCAGTTATTCGTACGGG	TEDH-1014313	CDK8	ACTCTCACTTTCTTCAACGG	CAGCAATTCACCTTACCCAG
CCGAGTGTTTCAGAGGGATTTAAGT	TEDH-1014315	CDK8	AATTCGCTTTATTGGGTCCA	AGTGACTTCACCATTCCCCG
TTGTCCCTCTCTAGGCTATAACTAC	TEDH-1014316	CDK8	GCAACACCCAGTTAGCATGC	GTTAACCAATGCTTACCAAG
AATGCGTTGTACTAGTACGAGTGGT	TEDH-1014318	CDK9	GCCCTCATCAGTCAGCTCTG	GGCAAAGCAGTACGACTCGG
AGCACTTTACGTAACTGTTTGTCCA	TEDH-1014320	CDK9	TGATGCACCCAGCACCCCAC	AGCATGCCCTTGAGGTCGGA
AGTACTAACATATTGTCGTGTTCAT	TEDH-1014319	CDK9	AGGGGCCCAGCCTTACCCGA	CTCCCAGGTGTGGCCAAACG
AACACTTTGTCTTTTAATACTTGCC	TEDH-1014321	CDK9	TGTCCACGTTTGGCCACACC	GATCCTGCATAGGGACATGA
TCTCTCACAGCCTTTGTAATGACTG	TEDH-1014348	CDKL5	CAAGCAGCAGACCAAAGGAG	GAGGGACTCCTAGAGGACTG
TTTTTTGGAATCTTATACAGTAAGG	TEDH-1014350	CDKL5	ACTGGAGATTGGACGATGAA	GAGTCCCTCCTACAGGACCA
GGATATTGGATACGCGGTTGCATCG	TEDH-1014351	CDKL5	CATCTGACCTGGCAGCTGGA	CGCTCCCTATGGAAAGTCCG
TGGCCGTGGGGGCCGTCGCGAGATC	TEDH-1014356	CDKN1A	AACTCATCCCGGCCTCGCCG	TGTCCACTGGGCCGAAGAGG
CTACCTTTGAGCTGGACTTCAACGG	TEDH-1014353	CDKN1A	GTCACCCTCCAGTGGTGTCT	GCCCAAGCTCTACCTTCCCA
TAACTAACAGCCGCTTGTAGATTGG	TEDH-1014352	CDKN1A	TGTCACCGAGACACCACTGG	CCATTAGCGCATCACAGTCG
ATTCCTACGGCGAAATGGTATGGAG	TEDH-1014359	CDKN1B	GCCTGGCGTCCATCCGCTCC	AGTCCCGGGTTAACTCTTCG
AATGGAAGTTTGGTCTAGTTGCACT	TEDH-1014358	CDKN1B	CAGGAACCTCTTCGGCCCGG	ACGGGAGCCCTAGCCTGGAG
TTGTTTACATTTGTATCAGCACGTC	TEDH-1014357	CDKN1B	TGATCCGTCGGACAGCCAGA	GGACCACGAAGAGTTAACCC
TTGGTAGGCGTGTGTCTTGGCAAAT	TEDH-1014367	CDKN2A	GGTACCGTGCGACATCGCGA	GACCTTCCGCGGCATCTATG
GCGTTATGCACTGGGCCGGTGGATT	TEDH-1014369	CDKN2A	TGTCGCACGGTACCTGCGCG	GCAGCAGCAGCTCCGCCACT
GATTGCGTTATACTAAGAGTGTGGT	TEDH-1014368	CDKN2A	CCACGGCCGCGGCCCGGGGT	GGTACCTGCGCGCGGCTGCG
GGGTTTAGTGTAGCGTGCTTCGCCC	TEDH-1014391	CDKN2D	CCTCAACCGCTTCGGCAAGA	CTGAAGGTCCTAGTGGAGCA
AGTCTGGTCAGCATAGCTTCGTTTC	TEDH-1014393	CDKN2D	GGAGCTGGCACTGCAGAGAG	TCAACGTGCCTGATGGCACC
TCGAGTGGTTGCAGTTCACGGCAGC	TEDH-1014394	CDKN2D	TGGATTCCTGGACACCCTGA	ATCCATCTGGCAGTTCAAGA
TCCATTTCGCCGGTCAACCGGGGTT	TEDH-1014392	CDKN2D	GGTGACCCCAGATCACAGCG	GCTGATGTCAACGTGCCTGA
TGCGTGTTCTCGGGTCCTAGGGCCT	TEDH-1014852	CEP164	AGCTGATCTCCTATGCGGAG	GATAGTGTTCGTCACATGGA
AAGTAGTTTAGATCCTGGACGGGCC	TEDH-1014851	CEP164	CGTGAGCCTGGGGAGCTCAG	TCGCCAACGGGCAGTCTATG
CATGTGAGAGTCGATGTAGGTTATG	TEDH-1014854	CEP164	GAGCCTGCAGCAGATCCACT	ACTGAAGAAGAGCCTCCCCA
AACGGGTGTTGATGCTTATTGGTAT	TEDH-1014855	CEP164	TCTTCAGTGGCCAGGCTGCG	GGCACCTCCTCTCTGCTGAG
CGGTTTCGACGATCTGGGTACTCGA	TEDH-1014917	CEP57	TAAAGCATGCCGAAATGGAG	TCGAACTTTAGTTATTTGGT
GCTCGAAGTGTCTGGGTGTGCTGTA	TEDH-1014913	CEP57	TTGGCTACCACGGCATGGCT	CGTAGATCACTATTAAGGAA
CCCCATTTCGACATTCTGCCGACTC	TEDH-1014916	CEP57	ACATGCACTGACTTCTGCAA	CACAAGCCCTAGCCATGCCG
GGTGAGTAGGAGGAGGACGGAGCAC	TEDH-1014924	CEP63	TATCTTCACTGGAGGCACAA	CCCAGTCCAGCGATTTCTGA
AGCAACGTACGTTTCAAACGTTGAG	TEDH-1014926	CEP63	TCCGTCAGAAATCGCTGGAC	ATTGGAATTGGGTTTACATG
TTGAGGATGTTGATACAGAGGGATG	TEDH-1014927	CEP63	TTCACTGGAGGCACAAAGGA	CAACTCCTGCTTATATTCCA
AGCCCGTTGCGTGAGTACACGACAA	TEDH-1014925	CEP63	GGAATTCCGTCAGAAATCGC	TTAGAAGGAATACAAAATCG
ATTAGGCGCATGAACATTTATATCT	TEDH-1015070	CETN2	TAAGTGAAATTGATAAGGAA	TTTCTTTATAGGTGGCAATG
ATCGAAAGGGGGCAATAGCGACCCG	TEDH-1015071	CETN2	GCTTACTGAAGAGCAAAAGC	TTTCTTGGGTTCAAAGCCCA
AATGACACGTTGCTCGAGATGGAGT	TEDH-1015072	CETN2	ACACTGATCTTAATAGAGGC	CATAGATGTTAAAGAACTGA
GTGGCTAGGGAGTTTAGGTGTGGGA	TEDH-1015068	CETN2	TGATCGAGATGGAGATGGAG	GAAATTGATAAGGAAGGGAC
ATTAGGTACGGTGTTAATACATTTA	TEDH-1015345	CHAF1A	GCAGAGGTCCAAGCCCCGTG	ATTCCGGGTGGAAACGTGCG
CAAGCTTTTTGATCTCTTTTTTTCG	TEDH-1015344	CHAF1A	TAGGTGGTGGAGGGGCTCCG	GATGGTTTCTTTGTGCCCCA
CGAAACAGTTTCGAAGGGTACCGTG	TEDH-1015343	CHAF1A	TAAGGTCCGCCAGAAACTGA	GATGTCGTCATCGTGGAGCG
ATTGCTCGGGTGATTCAGAGGGCTG	TEDH-1015347	CHAF1A	GGTTGCTGAGCAGTCCCCGG	CTATGAGGTGGACAGTGATG
GGACGGGGATAGCGATATGTTCTAC	TEDH-1015346	CHAF1A	GAAGCTCCTGGACTATGAGG	GCAACCACACCGGCAGCCCG
TGGGTTTGAGGCTTTTTAGGGTTAC	TEDH-1015352	CHAF1B	TTGACAGCAGGAGTGATGGA	AAATGAGCAGTAACCGTCCG
ATGTTCTAGTTCCAGTGTGGCTTTT	TEDH-1015348	CHAF1B	CAAAAGCCCACCCATCCCGG	CTGGGTGTCATACAGAAGCA
ATTTGTGAGAAGCTTCTGTCTTCTT	TEDH-1015349	CHAF1B	GATGGCTGTGTTATCCACAG	GTCCGGTCTACTTTGAACTG
GAGGCACTGACCCGCGTTTCATGCG	TEDH-1015411	CHD1L	CATGTTGGTGAGCTGCAGTT	ACTTCCCTCAAGTACGTTAG
CGACGGGATGGGGGGAATCTAACAG	TEDH-1015407	CHD1L	GTATATCATATCATACCTGG	TTCGTGGCATGTCCAATACG
AATGGATCTGCTAGACACTCAATGT	TEDH-1015410	CHD1L	TCTGGCCACTGGGGCAGAGG	ATAAACTGCTGGCCTCTGAG
GGGGCGCACCCGGCTCTGTTCATCA	TEDH-1015408	CHD1L	GGGAGAAAAGTAAAACCCGA	ACAGAAGTAGTGATATACCA
GGCCCGCTAGTTAGCTGGCGTTCCT	TEDH-1015421	CHD3	GGCGACTCAGTCCCTCCCGA	TTATGTATCGAAACTACCAG
TCATTCAGCTAGTATCTATGTTTAT	TEDH-1015420	CHD3	TCTGGCTCTTAGCAACTTGG	CCAGTGGCTGTGATAAACCG
CATGTGGGGAGTAAGTTAAGGTGTC	TEDH-1015419	CHD3	TCTTGCATCTTACTTCTGCA	ACTCTCTCCATTTGGCCCCA
GTGTGTCAGAAGTGGTTTGGGCCAA	TEDH-1015417	CHD3	ACCACTATCTAGTAAAATGG	GGAAGAGCGAATCACACAAG
CACACGTCTACCCCAGCCGTCGGTG	TEDH-1015418	CHD3	TCATTAGTGGGAGAACTGGG	CTCACCATTAAACCGATCGA
CTAACTGTGAGTGAGGTTATCAGGG	TEDH-1015425	CHD4	ACTTGATCAAGTAGTGGACG	TCGGTGGATCATCATCCACT
CCAATTTTTTGATTGTCGCCCGGGG	TEDH-1015422	CHD4	CATTGACCACGTGTTCTCAG	TCTCAGTGTCCAGCTCTGAA
CGTAGGTTTTATATTCTATTACAAG	TEDH-1015423	CHD4	ATATTTGAGCTCATTCAAAG	TCTTCCTTGCCCAGGCGAGG
TATCCGTTCCTGACCCTTTAAGGGG	TEDH-1015464	CHEK1	TAGTAAAATTCTATGGTCAC	AATCTTCTGTTGGATGAAAG
AGAGTCAGGCAAAGGTTGTCTAGGA	TEDH-1015463	CHEK1	GTACTTACTGCAATGCTCGC	GAGATTCTTCCATCAACTCA
CGTGTCATCGCTGCTTAGGTTCGGG	TEDH-1015465	CHEK1	TCTTCCATCAACTCATGGCA	GGTGTGTCAGAGTCTCCCAG
GGTCGTTGAAGAGTGCCGGGTGATA	TEDH-1015467	CHEK2	AAGAAGCCTTAAGACACCCG	AGTGCCTGTTCACAGCCCCA
AATTTACGTGATTGTACTGCAACGC	TEDH-1015471	CHEK2	GGGCCCATAATCGAGCCCAG	GACTGGGTAACGCTGCCATG
GACCACAAGTTTCCGTAATGGCGGG	TEDH-1015468	CHEK2	ATTGGCAAATCCATCCTGAA	GCATACATAGAAGATCACAG
TAATGACATACGATGTGGTCAACTA	TEDH-1015477	CHFR	GCCAGTATTACCACAAAACG	CTACGAGTCAGACATCCTGA
AGATGGCTCGGGTTGACCTAACAAG	TEDH-1015478	CHFR	CCGCTGCTCTGACGTCCTCG	GATTACGTGTGCCCTCTGCA
TGTTCAGGGGACAGAACGCCGCCTT	TEDH-1015480	CHFR	GAATCTTTAAGTGAAAAGCA	GCCACAGCAGTAACACAGAA
AGGCTTTTAGCACAAATTCTTGCTG	TEDH-1015652	CHRAC1	CTTCATGATGACCCGGATGC	TATTCCTACAGACACGGCAG
GGACGCTCTGTAAGGAGGGCACGTA	TEDH-1015654	CHRAC1	GTCTGTAGGAATAGGTGGCT	GCTGCCTCTATCCCGCATCC
ATGAGTCGTCGAAGCTACTTAAACT	TEDH-1015653	CHRAC1	CGAGGTGTCCAGCATCAACC	CGTGGGTAAAGACAAGGGCG
AGCAGCAGGCCGTTAGCTTTTCGTG	TEDH-1015656	CHRAC1	AAGACAAGGGCGGGGAGCAG	GGTTGATGCTGGACACCTCG
CGGCATAACTGCCGTGTGACCTCTG	TEDH-1015867	CHTF18	GCAACAGCTGGCCAGCCTGG	AGGGTGTCTCCAACGCCGTG
TATGAGAGGCATGAGAGGCTTCGTA	TEDH-1015870	CHTF18	AGGGCCTCCTCGAACGTCCG	GGAGCACATCATGAGGCGAG
TAGGGTACGCGCTAGTTGGTAATAG	TEDH-1015868	CHTF18	CATCGCCCGCGAGATCGAGG	GGTCATCGATGAGATCGACG
TATCGGGATGGCGTGCGGCTTGTCC	TEDH-1015869	CHTF18	CTTCCGCACACGCATCGAGG	GATGTACAGGCTGCGCCGCA
GTGGGCGTGGCTGATGGGGGGCGGT	TEDH-1015871	CHTF18	GGACGTGCAGGCCACACGCG	CATCGGGCGTGCGCTCCTGG
GACCTATGCAAGGTACTGTGGCCTG	TEDH-1015915	CIB1	TGACGTGCTGGAACTCAGAG	GCAGCTCACAAAACCGCCTG
GAGAGGCTGGTGTGTGCATAAAGAG	TEDH-1015912	CIB1	CTCCCTTTCCCAGATCCTGG	CTTCAAGGAGCGAATCTGCA
TCACGTTTCGCGAGAGCCCGGTCGG	TEDH-1015916	CIB1	CTCTCTCTACCAGAGCCCAC	CCTGGTTCTCACCAAAGATG
GCGGGCAGGAATAGGATCTAAACGT	TEDH-1016534	CLK2	TGTGGCGCACTTGGTGGATG	GCTATGGTGCTCATGGTCAA
AATGTGATTTTCTCAGTGCCTGATG	TEDH-1016532	CLK2	GGGCGAAGAAAGGATGCTGA	GCTAAGGCCCAGAAGCTCAA
TAGGGTTCGTATCGGTAGTGTTTCC	TEDH-1016531	CLK2	GACAGCCTGGCACAGCTGGA	CAATCAGATCGAAGAGCTGG
TATTAACGCTTTGCTGGTGTCTCCG	TEDH-1016535	CLK2	GGCGAAGAAAGGATGCTGAA	CCAGCGGTATCTGACCTCAG
CTTGTATCTCGAACATGCAGGATCT	TEDH-1016662	CLSPN	AGAGAGACTTGGGAACAGAG	AATTCGCTCCTTCCTCCACC
TATCTTCGTGTTACGCCGTCGGTTT	TEDH-1016663	CLSPN	ATCTGAATCCTCCTGCTGTA	TAGATGTTTCCATTAAACCA
CTAATTGAAACGAGCGGTGTTGTGT	TEDH-1016659	CLSPN	GAAGGAGAAGTCATGAAAGA	ATAGTGCCATGGCATTTCCG
ACGGAAGTTGAGGGTATGAGCTCAT	TEDH-1016660	CLSPN	AGTTATCAAAAGGAACCACG	TTCAGGTTCAAGTATCACAA
TTCGTAAAAGGGACAGCGTTTAAAG	TEDH-1017004	CNOT4	GTTGATATCATCTATCTCCA	AAATGAACCTACCTGCTACA
GCTTTTGTATTAGAGCGGGGTCTAC	TEDH-1017008	CNOT4	AAGTGCATGATGCTATTGCG	ATAAACCTACAACAAAGACG
ACCCACAGCGTCCTTTTTTGAACGC	TEDH-1017007	CNOT4	TCACACACTACAACCGCCAA	TCAGCGCCTAGCAGACCCAG
GAGCGTTGGCCGTGGTACAGTGGCT	TEDH-1017020	CNOT7	CAGTTAGAGCTGGAACGGAT	CAGGCAAGTTAGAGTTGGTT
GCCAGCATTGTCTGGGGTAGGGCAG	TEDH-1017019	CNOT7	ATAGGACCACAACATCAGGC	TCTGGAGTGGTCCTCTGTGA
TCCAAAATTGTCGTCCAAAGTATTT	TEDH-1017021	CNOT7	TTTCTAGGGTGGATTACAGG	ATGGGTCTTGCAACCACACC
TTTCCCCTGGGGTTTAATTGGGGTG	TEDH-1017023	CNOT7	ACTATCAATACCAACTATTG	TGAAGTTTGGGCTTGCAACT
CTTTGGGTGGACTTGGCCCGTATGC	TEDH-1017319	COL1A1	CGTCACTGTCGATGGCTGCA	GGATACTCACAGGTGCACCA
GTCGGGGACCTCTCGTAACGCTTGA	TEDH-1017321	COL1A1	GAAGGCGGCAAAGGTCCCCG	CTACCACTGCAAGAACAGCG
GGTTGTTGGGCGCGAGAAGATGGGC	TEDH-1017323	COL1A1	CCTGCGCCTGATGTCCACCG	CAGGGTGAAAGTGGTCCCAG
GACGGTTCCCCTCGGTGTGGCATCT	TEDH-1017320	COL1A1	CGAGAACATCCGGAGCCCAG	TCTGGAGCAAGTGGTGAACG
AACTTTGCATCCTTTCAGAGTCCTT	TEDH-1017322	COL1A1	GGGCTGAGTGGGGTACACGC	CTTGCACACCACGCTCGCCA
GATGCCGAGGGTCCGGCATTGTTCC	TEDH-1017334	COL21A1	GACACAAATACATATGATGG	GAATCCATACTCTACTTAGG
CGACACGGTCGATCCGCTGGTGCCT	TEDH-1017335	COL21A1	CTACCAGTCTTACTTCAGAG	CATCCTGCCCCGGAGCACCA
AATGCCTGTAAGGTTTGGATGCCAC	TEDH-1017336	COL21A1	CAGGTTACAAAGGAGAACCA	ACCTGGTCCGATAGGCCCAG
TTGGGGCGAATTTTGTTGGTTCGGG	TEDH-1017337	COL21A1	GATGGGTCGCAGATGCCTGG	ATAGGCCCAGAGGGTCCCAG
ACGTGGGGGGGGGGCCAGAGCCAAC	TEDH-1017638	COPS2	GGAATTCTATGAAACAACAC	GGTAAAATGCACTTGAGGGA
AAGCCGATACTAAAAACGGGCGGGA	TEDH-1017637	COPS2	ACTCCCATAATCAGTGGATG	AGCAGCTATTGACCTATATT
AGTAACGACGCTTAGAAGGCAGGGG	TEDH-1017636	COPS2	CATAATCAGTGGATGAGGGA	AACCACTTGCTTAAAATATT
AGGTCCTTGGAGATCGGGGGCAGTG	TEDH-1017642	COPS3	TCTTCATCAGCACTTGTAAT	TGTGAACTGATCAACAAGAG
GCTGCAGGGCTGCGTATGAATTGGG	TEDH-1017640	COPS3	TCACTCGCGATAACAACATG	TATCCACGTCAAGATATGGA
CTCTGGCCTTGTATTATGGCTCGCG	TEDH-1017645	COPS4	TATCTAGATAGGATCATCAG	AATTCATTGAAGCTGCACAA
GGTGTGACCCTAAGGGAACGTAAGG	TEDH-1017646	COPS4	TCCCATAGGCAGCAAGTTGC	ACAATTACAGATACATTATA
AGGGCCTAATGGATGAGTCGGTATA	TEDH-1017648	COPS4	TTCTGCTCCAGATAACTGAA	AAGGAATTCCCACCAACACT
GCGTTTGATTTGGACCAGCGAAAGT	TEDH-1017647	COPS4	ATGTCAGTCTCGTGATCTCG	TATATGAGAAAGAAGAAGAT
CGGGGCGTGGGATTTAGTAGTCTGA	TEDH-1017652	COPS5	ATACATAGAAAATGCAAAAC	CCAACAAGAACAATATCCGC
TATGGAGAGCCGCACCGGCGGATAT	TEDH-1017650	COPS5	GCCAAGATTCACTTTCCCTG	GCCACCCTGGCTATGGCTGC
TAGACAACTTTTACGACGTCTTCTA	TEDH-1017649	COPS5	GATGGGTCTGATGCTAGGAA	ACAGCAGCAAGAAATCCTGG
GCGCAGCCAGAGCTTAGTAAGATCC	TEDH-1017658	COPS6	TGGGGCTCTGATTGGCAAGC	CAAGGAATATTATTACACCA
CGTTAAAAACAACTAGTCGCAAGTC	TEDH-1017657	COPS6	TGAGATGTTGAGAATGACAA	AATGATAATCTTCTCTTCCA
GTTGTCCGGGGGCTGGAACAAATAG	TEDH-1017656	COPS6	GCAGCTACGAACGGGACCGG	GGGAGCGCATGCGGATCCAG
TGGTGAGAGGACCGTTGTTTACTGG	TEDH-1017662	COPS7A	CTGCTCACAGTGTTTGCTTA	CTTCTCCTTGCCAGGCTCCG
CGTGTGGTATGAGTCTCGCCAAGTA	TEDH-1017661	COPS7A	TCTCCAAACACGTAGACACC	GTGTATGCTGACGTGCTTCG
CGAGAGATTGCCTCCGAGAGTAAGC	TEDH-1017659	COPS7A	GCCTCCAGCAACACTGCATA	CCCTGACTCCTGCAGGTGTG
CGTCTTGTTACTTACGAAATATAAT	TEDH-1017665	COPS7B	CCTGGAGATGCGGAATCTCC	CCTGGCTTATGAGAGCAGTG
AACTCCGGTGGTAAATGCCTCGCGT	TEDH-1017664	COPS7B	CGTTCTTACCTCCTGCACGT	CTCCAGGTCTTTCAGCAACA
CGGACACTGGGATAGTCAGAGGCAG	TEDH-1017668	COPS7B	TTACTAGCCAAAGGTACCAG	TTCGCTGGTCCAGCTTGCCC
TGTGAGCAGTGATGCATCAGTCTGA	TEDH-1017670	COPS8	CAGGCAAATTCTGAACTTGG	AGTATACGCTTGAGAGACCA
CTTAGCTCGCTAGAGTACAAAAAAG	TEDH-1017673	COPS8	CAACCATCAACGCTCACCAG	CGCTTGAGAGACCAGGGCAA
AACGACAGTTTAGGTGTAACAAGCT	TEDH-1018292	CREBBP	GTACGAGTCTGCCAACAGCA	GGTGGCCAGCTCAGACAAGA
CCGCCCTTTTCAGATGCGTGCAATA	TEDH-1018295	CREBBP	CCACTTGGAGCGGCGCAAGG	GGCCAGCTCAGACAAGACGG
ACCCTACGCTGGGGAGGAGGTGTTC	TEDH-1018294	CREBBP	ATAGCAGCACAAAGTCTGTG	TCTAGCACCGGTGTAAGGAA
CGGGGCGAGTATTGGCTCTCCGGCC	TEDH-1018291	CREBBP	CCAAGAGCCCTGGCAGTACG	GGTAGCCTATGCTAAGAAAG
CTAGTATTAAGCGTATGTTGCTACA	TEDH-1018293	CREBBP	ATTAACTTACTGGAATTCCG	AGCAGCATAGGCTCGCTGCA
AAGGTTGGTGTCCTTGAATGCGTCC	TEDH-1018500	CRY1	GGTCCAGGATGTAGACGCAG	TGCTTGCTTCCTGACACGAG
AGGACCTTTCGTGGTCGCATCCGGC	TEDH-1018501	CRY1	TGCACCAGAAGGTATCCAAA	CCACGCTTTGATAAAATGGA
GTGCCAGGCGGTTTGCGGTTGGGTT	TEDH-1018499	CRY1	GTTCTCCTACCAAAACCAAC	ATACCTTCTGGTGCATTCCA
AGGTATCGAGGCCTGCTCTGGCATA	TEDH-1018498	CRY1	TCCATGGGCACTGGTCTCAG	GGTAGGAGAACAGATCCCAA
TTCAGGGGTTTTGATGGTGGTCATC	TEDH-1018504	CRY2	GCACGCCGTAGGTCTCGTCG	GGATAAGCACTTGGAACGGA
CTCTATCGTTGCAACCTGCCACGTT	TEDH-1018502	CRY2	CCCCAGGTTTGACCGCATGG	ATCCTCTCCCCACAGGAATG
CCATAGTCACCCGGAGCTTTATTGG	TEDH-1018505	CRY2	GAAGCAGCCGAGGAACCACC	GTCTCGGCATGGTTGACGAT
AAATTGTAGGACCATAACGCCTCGT	TEDH-1018743	CSNK1D	CAGATGGTGCGGGGCAGAGG	CGTACCGCGCCGTCCCCGTG
GTCTCCGTATCTGTCAATCTCTCGG	TEDH-1018741	CSNK1D	TCAGATGGTGCGGGGCAGAG	CTGTGAGGTGGACATGCGAG
TCTATCGCTTTCGTTTCGTTTGTGG	TEDH-1018739	CSNK1D	AGAACCTCACGGGGACGGCG	GAGTATGCGGCTGCACCGCG
GATCGTTAGATGTTTGTGTGTGCAT	TEDH-1018745	CSNK1E	GCGTGTTGATGGAAGCGTAG	GAGAACACGAACGCGAGGAG
CGTTGGTAGGAGTCTCTGTGTTTGT	TEDH-1018748	CSNK1E	TGTCGTCAAACCGCAGGGAG	GGGTGCAGCCCGGAATCCCG
GAGCTGATACACAAGGAACTAAGGT	TEDH-1018744	CSNK1E	TGTCGGGCTTGACGTCCCGG	GGGCTTGTCGTCAAACCGCA
CGGTGCGTCTTGGCTTGTATCGGGA	TEDH-1018747	CSNK1E	CCACGGGCTCGGCGGCACTG	GATGGCGACTTCCTCACCAG
ACCAGGGAATTCCGTTGTGATCATA	TEDH-1018746	CSNK1E	GCTTCCATCAACACGCACCT	CGTGGAAGCCACGGGCTCGG
CGTGTCATATCTCCTCCCCCTGGGC	TEDH-1018764	CSNK2A1	GATCATAATTGTCATGTCCA	CCTGGATTATTGTCACAGCA
AGCGGACTGTGGAAGTAACCGACGA	TEDH-1018767	CSNK2A1	TATCTGGACTCACAGAAATA	CATGCTGTGACAATAATCCA
GGTTATGTCTCTGGTAAGAGCATTT	TEDH-1018766	CSNK2A1	AGCTGGAACAGGCATCCCAA	CCAGGAAATCCAAGGCCTCA
ACTTGGGCCGGCCATATTCGTGCAA	TEDH-1018769	CSNK2A2	CAAGGGACCAGAGCTCCTCG	CAGGGCCCGGGTCTACGCCG
GAAAGTTAGTGGGATACCAACCGAC	TEDH-1018773	CSNK2A2	TATCACCAACAATGAGAGAG	TGTAGCCTCAAGGTACTTCA
GCGTAGCTCACAGGAACCTGAAAAG	TEDH-1018771	CSNK2A2	GCTCCTCAGACTGTTCACCT	TGACACTGTAAAGGACCCCG
CTATTTTCTGGGTTGTCTCTAACTC	CSNK2B_6	CSNK2B	ACGGTTGGTAAGGATGTAGC	CTAGAGCTTGTCGATAGTGA
GTGAAATGCCTTTAAAAAATATTGC	CSNK2B_3	CSNK2B	TGGTTCTCACAGTACACACG	CGTGAAGATGAGCAGCTCAG
AACCCTTCTCGCGCTCCACGTGATG	CSNK2B_4	CSNK2B	AGGTCTCTTGGGCCGGTACT	CGCTACATCCTTACCAACCG
TGTCTGGTGCGCCACGACATCGTAG	CSNK2B_1	CSNK2B	AGTAGGCGCCATCCGTGTGA	TCTAGAGCTTGTCGATAGTG
GGGTGTAGTGTTAACACCGAGTTGG	TEDH-1019103	CTC1	ACATCCTCATACTTTCTGGA	GGTGCAAGAACTCAAACCAG
GTAACGTTCGCCGGATCGCTAGACT	TEDH-1019102	CTC1	CGTCCAAGTGCCAGGCAGAG	ACACCTCAGACAGATCCCAC
AGTGAAGGGGGAGCGGAGCGGGTAC	TEDH-1019099	CTC1	TCCTTCTATAGGGAACACGG	TAGGGCTGTGTCCTAGAGAG
TCCCAGAAAGTCATTTTGGAGCCAG	TEDH-1019100	CTC1	GCTTGGGGTCAGCCTCTAAG	ATAGGCTGTACCAGGCCGAA
TTGGTTAACGTCCCAATACGAGTTG	TEDH-1019101	CTC1	TGTCCGTGACAAAATCTCAG	GACAGATCCCACCGGCCCAG
GTGGTGCGGGGTAAGGTTTGAAGTA	TEDH-1019106	CTCF	CGACCCCAACTTCGTCCCTG	CCACCCGCCAAGAAGCGGAG
ATTCATTAGGTCTTACACTTGTCGG	TEDH-1019105	CTCF	GAAACGAAGAAGAGTAAACG	TCGCACATGGAACACTTGAA
AGTGGAGATCAGCCTCTGGCGCGTT	TEDH-1019107	CTCF	CTGTAAAATGTGCATCTTCA	GTGACTTCTGATGCTGGATG
AGACTGTTCTTGCTGAGGAGGTATC	TEDH-1019388	CUL1	TTAGGATGGAGAAGATTTGA	ATAAATTCTGAAATTCTGTG
ACGGAGGATTAAGGTCAATCGACGG	TEDH-1019385	CUL1	AAACCCATCCTTACCTCTGA	CTTTATACACTGTTAACGTA
GGAAGCGTGCGTCAGTCGTTGGCTT	TEDH-1019386	CUL1	GGTGTACACACGGCAGAGCA	GTATCGAGCCAGCAACTCAG
CAAGGGTTAAACTGCCTACGATGTC	TEDH-1019390	CUL2	CCAAACCAGAAAGTAATCCA	TGTTATGTATCATAGGTACT
GTCCCGTTTCATTAACAGCTTGGTA	TEDH-1019393	CUL2	GTAAACCAGTGGACACAGCA	AATACGTCGAAAGAGCAACA
GGTCAGGTCGGATGTGGGGATAAAA	TEDH-1019391	CUL2	GTACTGGGAAGAATACAGCA	TCATGAATGTCAACAACGAA
ATCCTGTAGCTAAAGCTTGACTCAA	TEDH-1019395	CUL3	CTCTTTAAACAAACTATTGC	AAGCATGTCTTGGTGCTGGT
TGGGATACTGGTAGACACTACGGCC	TEDH-1019396	CUL3	TGGATATGATTGCAAGAGAG	AAGTAACTGGCTCTAATACA
GTTTAGGCGTAATATCCTCCTGGGG	TEDH-1019397	CUL3	CCTGTGGTAAACCAACACAG	CTTTGGTGTGGCTGACTGAG
ATACTCGGTGTAGTAGATTTTTGTA	TEDH-1019399	CUL4A	ACAGTGGTCGAAAACTTCAG	CCATGTAAGTAAACGCTTAG
AGCGCCCTCAGAGTTTCTTGGCGCT	TEDH-1019403	CUL4A	ATCCTGTTCAGGTTTATCCA	TTGTGAGTATGTTCACTGTG
GCCAGATATTTGTTGGATCGTAACT	TEDH-1019401	CUL4A	GTTGGACTTCAAGGACAAGG	ATCCTGAAACACTCTCTCAG
CGCCAAGGCCATTGTGATTCACTGG	TEDH-1019404	CUL4B	GGTTGTACACTTCTGAAACA	TCTTCAATGTCTTTGCCCTT
GAGGAGGAAGCTAGGGGAGAGAGAA	TEDH-1019408	CUL4B	TCAAATCCAGATGAAAGAAA	ATCAAACCCTACAAACTCCA
TAATCTTTTGTTCGGGCGATCGCAT	TEDH-1019407	CUL4B	ATCATATTTAGATTTATCTA	CTTCAGAGGATGGAGAGTTA
GGAAGATAGCTGCGGGAATGTGGTA	TEDH-1019412	CUL5	AATCTGTTACAAAACAGCAG	ACTCCTGGTTCACTGAGAAG
AATGTTGGCGATGTGGAGAAGTCAT	TEDH-1019411	CUL5	ATAGGAAGTTGGTATGCCAG	TCTCTTGCAGTAAGAAATCG
GCGATGTGGGGGCTTTGGCGGACGC	TEDH-1019413	CUL5	GCTGGTACATGCTGAGAGAT	CCTAGCTTATGCTTGATACA
AGCGAGGTTTCTGTACTTAAAGTTA	TEDH-1019410	CUL5	TCTTTGGGTGAGTTGACTTG	GCCAATGTTGAAAGACTTGG
TATCAGATGTAGTCTGTGTCTGTCG	TEDH-1019417	CUL7	ACAGTGCTAGCAGAGCACAG	TCTTCACACGGAACTCAACT
CTCTTAGATCAGTCATGGGATTTCA	TEDH-1019414	CUL7	TTAAAGTGCTCACAGTAGCG	AGTGAGCAGGGACTATGCCG
AACCCCCAGGAGTAGATTGTGGTTG	TEDH-1019416	CUL7	CCCTTGAGCGAGGCTCACAG	GGCATGTAAGCCGGGCCCCA
GGACTCGGCATGGGTGTAGCGTGTG	TEDH-1019415	CUL7	TCTGCTCCTGAGGAGTTGAG	GGGCCTCTTGAAGAGGTGAG
GCTGTCCATGTACTGGAGGGGAATA	TEDH-1019421	CUL9	AACACCACGGTGCATGTGCA	ACATATGGCCACAGCTAGCA
AATGAAGTGACGTGACAGTAATTGA	TEDH-1019423	CUL9	GTGGATGGTGTGAAGCACAG	CTATGACGGCATGAGCGTGG
GTAGATTGGGGGTACTTTATATTGT	TEDH-1019422	CUL9	GGATCGAATCAGTAGCTCAG	GATATCTGACCCAGGCTGAA
TCCAAGTTCTGTGGTGACTCCCCGT	TEDH-1019670	CXorf57	CTCTAACAGGTACCTCTGGA	CTCACCACTACAAATGAGAG
TTTAGGTAACCGAAATTAGGGGGGT	TEDH-1019668	CXorf57	TTACAGGCACCACCTCCGAG	TTTATCCTGAAAGTATTCCA
TACTGTTTCACATAAGGACACGTCA	TEDH-1019671	CXorf57	AGTGGACGTTATCTATGCAC	GTACCAGGAGAAGTGCTACC
TATCGTATTTGATTTAACGACTGTC	TEDH-1019593	CXXC1	CAAAGACATCACGTACAAGG	ATCGGCGTTCCATTTCCTGA
TGTGTTTATAGTTATACAGAGGAAG	TEDH-1019596	CXXC1	CACTGCCCTCTTCCGCAGCG	TGATCCGGATGCAGTCCCCA
AGGGTATTCAGGGGGATACATGCCG	TEDH-1019597	CXXC1	CATGGAGCGCTGCTACGCCA	GCTCAAAGACATCACGTACA
CAGCGTGATGGTAAGGCTCGGCCCG	TEDH-1019594	CXXC1	CCATTCCATGCAGAGCAACG	TGTGGGGTACATGGACCCAA
TTGAACAATCCGTCGACTACGGCCG	DAXX_2	DAXX	CGAAGCACATCCCCATAGTC	GGAATGGGACCACCTCAGGG
GGTGGTAGGGCGATCGTGAAGGCTT	DAXX_3	DAXX	GACCTCATCCAGCCGACTCA	ACGGGTCCTTGGAGACTGAG
TTTGAGGGGAGTTGGTGGTCGTTAG	DAXX_1	DAXX	GAGCAGCGCATCCCCTACCG	CTGGCCTATAGTCATCTGTG
TTGTTAGCTTCGTCTGGGGACCGAC	DAXX_4	DAXX	CCCGGCGCCTTCGGGAAAAC	GGATGCGCTGCTCTATGACA
GAAGCTATGTCACGCAGTGTTAACG	TEDH-1020317	DBF4	GAGCCTTTGCCTGAACAGTT	CCATGAACTCCGGAGCCATG
CGGGGGACTACACGTGCGGTAGGCT	TEDH-1020316	DBF4	GGACATTAAGGATCTGGGAG	AGCAAACTCAGGTTAAACTA
CGACTTCTTATAGCAGGGTGTCTAT	TEDH-1020318	DBF4	TCTACATCAAATGGACTGCA	TTTCAACTGGAGTTGAATTG
CGTGCTAGTGATGTGTATCGTTTTG	TEDH-1020320	DBF4	CATGAGTAAATATTGAATGA	TGGTGACAGAAGGTAAGTCA
GATATGCGCTACGCCCCTTACGCAT	TEDH-1020319	DBF4	TTATAGGTGTGTTTAAGCAG	ATATCTTCCACCTTTACAAA
TGAGTGATTCAAAGCCCCTATTATC	TEDH-1020383	DCAF11	TGTGGGATCGACGCACCATG	GGCCAGCAGTTCATCTACAG
GAGAGACTGTTCACGGTCTACTTCA	TEDH-1020385	DCAF11	TCAGATGGACGAGAAGTACT	CCTGGAAGTACTCAGCCTGG
GGAGGGGGCGGGTGTCGCGTCATTG	TEDH-1020553	DCLRE1A	TACCATTAGGAAGATAAAAG	GACACTGAATGTATTGTGAA
CGCGTGTGGGCTCTTTCACCAAATG	TEDH-1020554	DCLRE1A	AAGAGGATCATGACAGCACC	AGCTGTCATCATCTTCTTCG
GAATGTTTGGGGTATAGGCTGTCGC	TEDH-1020556	DCLRE1A	ACAATACATTCAGTGTCCAG	GGTACTGTCATATTACACAC
TGGAGTGCGGACGACCGGGTGGGGT	TEDH-1020558	DCLRE1B	CTGTCCTGAAAGCCTCCACA	CATGCACTCGGACCACACCG
GCTGACATAAGGGTTGGCACGATCT	TEDH-1020559	DCLRE1B	AAGTGCACTGAAAATCCCAG	GGCAGATGTGTTCACAGTGG
TGAGGGTAGCGATAGATTAACCTTT	TEDH-1020561	DCLRE1B	GGATGACGTGGATATCAGGG	TCTTGATCCGCAAAGGATGG
GGCTGTCGGCGCGAGCAGGCAATCG	TEDH-1020560	DCLRE1B	TGTGGGACAGGGGAGAACCA	CATCTCCCATGGGTACCAAG
TTTGTTGGTGCGTCTATATCAGGCT	TEDH-1020563	DCLRE1C	GGAGACTTCAGATTGGCGCA	ATAACAAAACAGTATCAGAT
GTCGCGGGATCTCTAACTTGTAGCC	TEDH-1020565	DCLRE1C	CAGTGAGACACATATACCCG	GAGCCAAAGTATAAACCACT
TGGCCATGTGACACTGAGCTCGTCC	TEDH-1020562	DCLRE1C	GGAGCCCGTACCATGTTGTG	GCATTAAGCCATCCACCATG
TACGTGTATAATCAAATAGTAGTGC	TEDH-1020655	DCUN1D1	GAACAAGAATTGAAAGAACC	GCCATCCATGAACTCCTGTT
AATAGGCTATGAGAGAGGGGCACCT	TEDH-1020652	DCUN1D1	GATCAATACCAAAAGACACT	ATCAACACACTAATGCTGGC
AACTACTCGACATAGTAAGGGTTCG	TEDH-1020654	DCUN1D1	GAGAATAAAATTGGAATAGA	TTAGTGTGTTGATTATTGCG
ACTATGAGTCGGGGGGCATGCCTAT	TEDH-1020656	DCUN1D1	ATTAAGCACTAAGTTCCAGT	TTGCAAAATTAAAAGTAAAC
TGGTACTGTATACGGGAGGCTATGT	TEDH-1020653	DCUN1D1	AATAATCAACACACTAATGC	CAGCTGTACAATAGATACAA
CGTGCTACTACAGCGAGCTGCATTT	TEDH-1020658	DCUN1D2	TCAGTGTATTGGTCATAGCG	GGACTTTGGAAACATGATTG
GCACGTTCAGCATAGTCCAGCAGCG	TEDH-1020661	DCUN1D2	CGGCTGTACGGCAGGTACAA	GGAAATTAGTGTTATCTGGA
CCTTCTGGATATTGACGGGCGTTCG	TEDH-1020660	DCUN1D2	CGCTCCACAGGGAGTCCATG	GAGTGCACGCCATAAACTGG
AGATGTTGAGTCAGTGTTCGAAGTG	TEDH-1020662	DCUN1D3	GCAGCACTCGAAATTCTGTG	GGAGATGCCCTTGATCCCCG
GGGGTTATTAGTGTGTCGAAGTGGT	TEDH-1020665	DCUN1D3	TTTGCTGCCCAGGGTCGATG	GGTAAAGACTAGTTTCCACA
GACCGGGGATTTTGGACATGCTTTT	TEDH-1020664	DCUN1D3	GGGAAATAGCCATTGCCCTG	TCTCCACCTGGCTTGCCACA
CGTTAGATGTTGCCTGACGCCCGTG	TEDH-1020663	DCUN1D3	GCACTCAGCTCAGGGCCTGA	GAGATGCCCTTGATCCCCGA
TTTTCGCAGGAGTGTTCGTAGGCGT	TEDH-1020667	DCUN1D4	AAACACTGCCAAGTGCATGT	AATTTGGTACCTCTAAGAAT
CGGCTTCTATTCTCACTAGTTTCCA	TEDH-1020670	DCUN1D4	GGGCGGCTCCGTGAGAAAGG	AAATTGGATGCACAAAACAT
GTTAAAGGATAGTCTCTTAATTAAC	TEDH-1020669	DCUN1D4	ACAAACTCGTCCAACAAAAC	GGCACCGGCGGGGAGAGGGA
CTCCCGTCTGGTTTTTCTTGTACCG	TEDH-1020671	DCUN1D4	AAGTTATTAATAAAGACCAG	GGCAGATAAATCATCTCCAG
CTAACGAATTTGATAAGGTTTGTCC	TEDH-1020672	DCUN1D5	ATTTAGCAGTATCAATATCA	CATAGTTACTAAGATCAGCA
ACGGTTGAGTATTTCGAGAGTGAGG	TEDH-1020676	DCUN1D5	ACCTACCCTTGCAAAATCAA	ACCAAGGAAGAATGGTTAAA
CACTAAGTGATCTTCTTACTGCAGT	TEDH-1020675	DCUN1D5	TTCTTGATGAATTTGTTGAG	TCTATGTTAGCTCTTCTGCT
ATACCGTGGGCCCGTTTTTACACGC	TEDH-1020674	DCUN1D5	AGAAGAAGAGAAAATCCCCT	CAAGCAAGAAGTGCCTGGCT
ATGGGCGGTGAGACTTGAAACCGGA	TEDH-1020699	DDB1	CGACATGTCGTACAACTACG	AGAACAAGCAAAGACGTTGG
GAACGGGCCAGATTGGAGACTGAAA	TEDH-1020696	DDB1	TCAGGCCAAGAACATCAGTG	GTCACCGTCGATGAAACCTG
TGAGATCGTCGCCGGCATCTTGCTA	TEDH-1020697	DDB1	GGAAAAGACCAACCTCCTGG	TCTATGTGGTCACCGCCGAG
GGCGTGCGATATGCAAAGTACCCGA	TEDH-1020701	DDB2	AGAATCTTCTGGCATCAGTT	GCCACAGTGCTGGGGTGAGT
CTTAATTACATTGCGTCTGTGATGG	TEDH-1020704	DDB2	CCTGGCTCCAGATGAGAATG	GGTATCGGCCCACAACAATG
AATAGGACCCCAATTGGAACTGTGG	TEDH-1020700	DDB2	CCACAGTGCTGGGGTGAGTT	CAAACCCACCTTCATCAAAG
GCCGTTGTTACGAGCTGTTCAGTCG	TEDH-1020785	DDX1	ACAATTTGATAATTATGGAG	GGGTCTGGCAATTTCCCTGG
CCACTTTCAGCGCGGAGTGTCTGCG	TEDH-1020786	DDX1	GAGAAGTAAAGGAATGGCAT	GCAGAGTAGGAAGAGCTGAA
ACTAATCAGCTCTCGGTAGCGATAT	TEDH-1020787	DDX1	TCATGACCAAGGGTTATGCA	TACATCGAAAGAATGCAAAG
CTTCAAAAGTTAAAGTGGGTACGAT	TEDH-1020797	DDX11	GCAGACCTGATGTTGGGGAA	TTCTCTGCATGTCCACACAG
CTAGCAGAGTTCACTAGGTGGGTAA	TEDH-1020796	DDX11	GGGGCAGGATGTTGTCTGGA	TCTTTCCTCCAACCACAGAG
TGTTGCTTCTGTAAGAGGTGATTCC	TEDH-1020795	DDX11	GGTGAAGGAATGCCGGGCAG	GGGCTGCAGGGATGGCAAGG
TTGATCATCGCTCACGGTGTTTTCG	TEDH-1020798	DDX11	GATGCCCGCGGCCTGCCGAG	AAGGGGCTGCAGGCACCCCG
AATGTGCGTGAGCCTGCGGGGAGGA	TEDH-1021666	DICER1	GCACAAAGTCATCAATGACA	CCTTCAGCCCCAGTGAACAG
GGTCGGTACAAACTCATTAGGGAAA	TEDH-1021669	DICER1	CCTCGACATTTGAATCAGAA	GACCAGGTTCCACGAAACGA
CAAGGGTACGTACCATCAGGAGGCT	TEDH-1021667	DICER1	GAAGGCGATAAAGTATGCTG	GAGCTGTCCTATCAGATCAG
TTGAGTTGGGCCGTATAAGGTACTT	TEDH-1021665	DICER1	GAAGGGACTACCCAGCCGCA	ATCCAATTCCAGCATCACTG
CCCCTGTCACCCCAGGTCGTGCGGC	TEDH-1021773	DKC1	CAACTCCCAATAACAAACCA	GCAGGTAACTCTCATCCTTG
GGGGAGTAATTGTGGATGCCGGTAG	TEDH-1021776	DKC1	TCAGATGCAGGAGCTTCGGA	TCCAGGTGTTCTTCGATATG
AAGGGGATACTACTGCGGTTAATTC	TEDH-1021774	DKC1	CACTTATTGCTGCAGTAAAG	GGTGTTCTTCGATATGAGGA
TAACCTCCTAATGGTATGAACCCCG	TEDH-1021874	DLGAP5	ACTACATCACCAGAAAATGC	ACTACCTGTACAGATCTGGA
TGCTATGAAGGGGTTCTCTGTCTTG	TEDH-1021873	DLGAP5	CAACAATCTGATCAAACTTG	GGAATTTCAGATGTTGTGGA
CAGACAACGGAAAGCTGTGAAAGCT	TEDH-1021877	DLGAP5	ATTTCTCAGTTTCTGACTGG	AATTAGATGAGACATCTCAA
CAGGATAATATCGACGGTGTGTGAG	TEDH-1021951	DMC1	ATAAGCTTGCGAAAGGGAAG	GCCGTTCGGCCAACTCCCCA
GCCAAACGGTCCCTGAGGGGTGGGT	TEDH-1021950	DMC1	AGAGCTCTATGCAATGTCAA	TTTCAGTGGCCGTGGGGAGT
ATTGATGACCCGACCAACCTATACG	TEDH-1021953	DMC1	ATACTCAAATTCCTGGCTCC	AACAAGAATAAGCTTGCGAA
GTCGCCGAGGTCCGACCGCGGGCGA	TEDH-1022043	DNA2	TGCAATAATACCAATATCAG	AATTGGTACGGTTCTCCATG
CTGAGGCTTGATGGTTTGGCACTGG	TEDH-1022042	DNA2	ATTAAAGCTAAGAAACCAGA	AATACAGTAGACAAATACCA
AGAAGGCGTCTGTGGAGCTGAGGAT	TEDH-1022044	DNA2	CTAAGGTAGGATATAAACTG	GTTGGTGTGAAAATACATCG
AGTTTAAGGCAAATAATTTAAGTCG	TEDH-1022046	DNA2	AGTAGACAAATACCAAGGAA	AAAAGACTACACACTCATCG
TAGACATTCTCCCCTTATCATTTTT	TEDH-1022045	DNA2	GGAGTGTGGATCAGACAAAG	CAATACTGTACAGAACAAAG
AGCGGCGAGCGTAGTTACTTGGACG	TEDH-1022285	DNAJC2	ATCCTCCAGTTCCTGAAAAG	ACTTGGCCATGTGAGATACA
CTGCCTTTGGTGTAAGGACGTTATG	TEDH-1022284	DNAJC2	CTGTTCTTCTGTTGTCCAAG	TACTTCACTTGCATAACTAA
GGGCCGCTACAACTAAATGTGTACA	TEDH-1022282	DNAJC2	TCCCTGCTGGAACAAATTCA	TGGAATTCCTTTCAAACACT
CTTTGGTAAGGTTATTTTGATTCTC	TEDH-1022283	DNAJC2	ATGCATACAGCTGTGATCCA	GGATAAGAAAGAGTTATCCG
CTGATTGGTTTTCGGGAGCCAACCA	TEDH-1022460	DNMT1	TGTCTCCTTCAAGCGCTCCA	GCAGGTGGAGAGTTATGACG
GTAAGATGGCATGTAGGCTTTAGAA	TEDH-1022461	DNMT1	GCGGCTCTCAGACGGCACCA	GATCTGGTAGACCAGCTTGG
AGGGCATCTGTTAACGACTTCTGCG	TEDH-1022462	DNMT1	GGCACATCCCCTTGGCCCCA	CAGGTCCTCCCCATACTCCA
CGAGTTGCTCGTCGGGATATGGGCT	TEDH-1022464	DNMT1	CGCAGGGTCCCACATCTCGA	GAGGGTCCGACGTGGCCCCG
TTGTACGTGTACGTAGACGGCTACC	TEDH-1022489	DNTT	CATAAGAGCAGGGAAACCGG	GATTGGATTATATTGAACCG
TTTCCGAAAATTCTGCTCGCTACGG	TEDH-1022492	DNTT	AAATTTGATGTCTTGAGGAG	CAGAACTAAATCCACACGGA
CGCCTTGACAGGACGTAGGGGCGAC	TEDH-1022490	DNTT	GGCAAAGGCACGACGCTCGT	CATCGTAGCAGAGAACAACT
GTCCCATTCTCTGGATAAATTGAGT	TEDH-1022491	DNTT	TTACTTCTGTATTTGGAGTG	GACCTGGAAGGCCATCCGTG
TTCCATAACTATGCGGTACGCGATA	TEDH-1022822	DPY30	GTTGTGCCTATCTTATTACA	GTGAGACCGTACTCAGAGTG
ATTGATATCGCAATAGGGCTGGTCT	TEDH-1022821	DPY30	AGAAAAGTCATCAAAGCAGA	TTGCTGTGCTTGCAAAGGAA
TGACTGCTCTAGGGGCACTTCCGTG	TEDH-1022819	DPY30	ATAAGATGCTAGAAATTCAA	GATGCTGGAGGGACAAACGC
TGGATCGCACGCCTGTGTATGCGCC	TEDH-1022820	DPY30	TAAGATGCTAGAAATTCAAT	GCAAGTCCCTGTAATAAGAT
CCATTGCCTGGTCCTAATACACTAG	TEDH-1022940	DROSHA	CCGGGACGAGGGTGTCCCCG	AATTGAGCCAGACTTCGCGC
CTATAAGTGTTGAGTGGATGTCGTT	TEDH-1022939	DROSHA	CCATGCCCGAACCTACACTG	CTTTGGGACTATTTGCTAGG
GGACTGGAGTGAGTGGCAGTCGCGT	TEDH-1022937	DROSHA	AAGAGTATAAGAGATCTGGA	CTACTACTCCAGTGACCCCA
TCGGCTTAAAGGTTGGCCCTCGCTA	TEDH-1022972	DSCC1	TCGCTGAGTTTCAAGAAGTG	GAACACTGTCTTAAATGTTA
TTCGTGACCAGGTTGTGTTGAGCGG	TEDH-1022975	DSCC1	AACACTGTCTTAAATGTTAT	TGCTACAGTCTTGTGATTCG
GATGTTCTAGATACGCGATTCCGAT	TEDH-1022974	DSCC1	CTAAATGCCTGTAAGATTGG	TGTGGAGAGAAGCAAACCAT
AGAGTATGAGTGAGTTATAGGTGAT	TEDH-1023095	DTX1	CCATCCCTAAGTCGCAGTCG	TATCGGCACGTCCAACACCA
AGTGCGGCGCAGCTTCACTCCGTGT	TEDH-1023096	DTX1	CGCACGGCAAGCGCGCCTGG	CCTTCAGCACGTTCTCAATG
GCCGATGTAGCGGAATGACTGCGTG	TEDH-1023093	DTX1	AGCAGAAGCCTAGCGATGAG	GGTCACAGCATCAGGCTACG
ATGCATATGGCCGTCTATACTCCAA	TEDH-1023092	DTX1	CAGCCGCTGGCGGCCCTACA	GTACTCCAATGGCAACAAGG
CTTTTTTTGTAGTGGGGACTGCGAG	TEDH-1023100	DTX2	CAACAAACCCTCACTCTCCG	GCAGGTGTACACCAGCCCCG
AACCTTACAGGCGGGCGTAGATAGG	TEDH-1023097	DTX2	CCCCTCACCTGGATACCATG	GGGGAGGTCAATAATGTAAG
GGTTGGGTGCGTACAATGGGATTGG	TEDH-1023105	DTX3	GCACCTGCCCCATCTGTCTG	TCTTCCCGCCCGGTGTCCAG
GTTCCTGGTGATAGGACTCTCCTCC	TEDH-1023103	DTX3	CAGAAGTCTCGCCATCTATG	TTGCACCCGGGTCAGGTAGG
CGGGCTCGAATTCGGGTGCCTTGGG	TEDH-1023104	DTX3	CTGCGAGGGCTGCATCACCC	GCAAGAGGAGCTGAGAGCGA
GGAGTCACGTTCAGGGAGGGTGGGG	TEDH-1023108	DTX3L	GTACACCCGCACGAGGAGCG	CGTGCACTCCCCGCCGCCCG
TCCTTGCTCGAACAGGTGGCGTTCA	TEDH-1023110	DTX3L	CCAGCTTCCTTCGTACTCGG	CAGAAAGGAAATCAGCCAGA
AGGTCGATGGTTACGTGTAAGTGCA	TEDH-1023107	DTX3L	GGGCATCTGTGTCATCTGTA	ATGCAGTTCGCTGTATTCCA
TGGTTGAAATGTCACGAGTCTTGGG	TEDH-1023111	DTX3L	TGTGTCAGTGAAGAAATTTG	ACCTGTTCTCCAAAGAGCAG
GAGATAGTTCTGTTATCATATGCCG	TEDH-1023109	DTX3L	ACTTCCTATGGTATTCAGAA	CATAGAATAAGTAATCACAA
CAAGTTGCGCATACTATGTGTGTAG	TEDH-1023113	DTX4	CGTCTACCACATCTACTGCT	GTCTTGCTGTTGGGTCCTGG
GTGATTACGCGGCACTGGAATTTAT	TEDH-1023112	DTX4	GGATCCTCATGAGTGCAGCG	TGAAATAAAATCCATCCCAG
GAGTAAGGAGCGAAGTTTCCTCTGA	TEDH-1023116	DTX4	GATGAGTGTTAAGGCAGCCG	GGTTCTTCACTGGGACTGTG
GGCGTGGTTACTTCCTCAATTACGA	TEDH-1023290	DUT	GCTCGGAGAGCCGGGCAAAG	TTTGCAGCCAAGCCTGACCG
AATGCGGTTATTTAGGCGTCGCATG	TEDH-1023287	DUT	ACTCTTCCATAACACCCAGA	CCGGGGAATCCCGTGCTGCG
CATGAGATCTCGCTGGAACATGCTC	TEDH-1023288	DUT	TCTGGGTGTTATGGAAGAGT	CCTGTACAGGTCGTAGCCCG
GATCGACGTCAGCACCCCGGCTATT	TEDH-1023367	DYNLL1	ACACTTCATCTACTTCTACC	CACGGCCTTTCGGTCGCACA
TAGGGCAATACCAATTTATGTATAC	TEDH-1023369	DYNLL1	TGAACAGAAGAATGGCCACT	CCCCACGATGCAATGCCAGG
CATGTCGTGTATTAGTTGACTTTTC	TEDH-1023366	DYNLL1	CCACCTGGCATTGCATCGTG	GGTAACCATGTGCGACCGAA
TTGGCTGGGTATTTATTCAGGCGCA	TEDH-1023651	ECT2	TTCTTATCCGACCAGTACAG	ACATCCCACGGCTCAGTGGA
GGAAGTAAACCGGGCCAAGAATGGT	TEDH-1023652	ECT2	GTGACATTGGTCCATCACAT	CTATATTCTCTTCAACTACA
AGTATGTTTGGACAATGTGGCGAGT	TEDH-1023649	ECT2	TATTAACATCCACTACTGGG	ACATGCTTATCATTGCTGGA
AACCCTAAACTTATGTCAAACATGG	TEDH-1023650	ECT2	TATGACATCCCACGGCTCAG	ATATGCTTAAGAGAAGCTGG
ATTGCTCTATCTACTGGCGTTGGTT	TEDH-1023818	EEPD1	TCTGTCTTTGCAGTTCTGCA	GTTGGCTTCACTTCGCTCCA
AAACGCCATTCAGTACATGTGTCAT	TEDH-1023817	EEPD1	CCATCCACCCACACGAACGG	GGGGCCCCGGGGATGCTGGA
TATTATCAGAACTTTTTTAGTGGAA	TEDH-1023814	EEPD1	ACAGCCTTCCAGCATCCCCG	TATCTCCACTCGGCCGTCCG
GCCTGCCTTTCAGGCCGGCGCAGCA	TEDH-1024105	EID3	ACAAACTCAAAATAGGACAC	GGATGTGTCAGTGAGGGCCG
CTTTTCTGGGCGTACCTGGGACGGT	TEDH-1024107	EID3	TATCTTTGACTTTACAGGAG	ATCAATCACAAACTCAAAAT
GGTCGTTTCGAGACCGGGTTGACCG	TEDH-1024104	EID3	CAGAAGCCATAACAAGAAAC	GAGGTCGTCGGAGCAGCCCG
CATGGTACCGTTCGCTGATACGGAT	TEDH-1024106	EID3	TTCGGCTCACGCCATCAAAG	GGCAGCTCATGTACTGCGTG
CATCTCATGGTCGACATTGATGGTT	TEDH-1024267	EIF4A1	CTTCTTGACAAGAATCCGAA	AGATCTGGTCCTTGAATCCA
CACATGTGAATTAATGTAAATCATC	TEDH-1024268	EIF4A1	GTCACCTCAAGCACATCAGA	CCGCCAGTTCTACATCAACG
GGTCGCTAAGCGTTGCTTTATAGGG	TEDH-1024269	EIF4A1	CATCAACGTGGAACGAGAGG	CATCAACACCCGGAGGAAGG
TACGCTCTACGAGTGAAGCGGTAGC	TEDH-1024641	EME1	GGACAGCACTATGAAAGGGA	GCAGACATACAGGTGCGCCG
TCTGTTTTGGCCCTTGCGAAAATGC	TEDH-1024643	EME1	CCCTGTTTCCCTCTTCTTGG	GCAGTGCTCTTACAGATGGA
CACTGTCGTTCAATGACCTGGCTCT	TEDH-1024639	EME1	AGGAACCATCTTCAACAAAG	CCTGCGCCTCAATCACACAG
CGTGAGCTGCTACGATTCTAGAGTG	TEDH-1024642	EME1	GCACTATCTAAAGAGAGATG	CCACAAGCAACTGAGCCCTG
AAGCGTGTCGTAGTTCGGTCTCACG	TEDH-1024648	EME2	GCACAGGAAGGTCGGCCAGG	GAAGCGCCTCGCGGTGTGCG
AACGTAAGTGCGTGGAGTTAGGGAT	TEDH-1024644	EME2	CTTGGCATCACGCACTTGAG	TCTCGCCAGCACGTTTCCCG
TAAGTGTGGTGAACCCGATATGTAT	TEDH-1024647	EME2	GGCAGATCAGGCAGTTCAGT	ACAGCAGCCAGAGAGCCCGA
CAGGGCCCAATCTATATGGTATCGG	TEDH-1024646	EME2	CCTGTGCCGCCCAGTGAAGG	CCAGAGCTGCAGGAGTACCA
TTTAGTATTTAAATCGGTGGATTGA	TEDH-1024769	ENDOV	TTCTTGGCCACCCCAACACA	GACACTGTCCCCTTTCACGA
GCCGCGATTCGGAAATATGTGTTTG	TEDH-1024773	ENDOV	AGGGAAGCTGAGCACCACCA	TCCCCGGGCCACCCACACCG
TGCCAGATTTCCTTTAGTCAGGCAA	TEDH-1024770	ENDOV	TGTCCGCGCTTGTGCTTCCC	CCAGGAGCCCGAAGGCGCAG
AGGTGCCTGGTGGTGAATGAAGTGC	TEDH-1024933	ENY2	CGTTACTGTTGATGACTTGG	GGTACCTGACAGTGTAAAGA
AACCTCAATATCGGGGATGAGGTCA	TEDH-1024936	ENY2	GTGGCTGAAATCACTCCAAA	AGAGCTAAATTAATTGAATG
ATGTATTAGCAGTGTAGTAGTGGTC	TEDH-1024935	ENY2	ATTAATTGAATGTGGCTGGA	GAAATCACTCCAAAAGGCAG
ACGCCAGTATAAAGTAGATAGCGCT	TEDH-1024937	ENY2	ACACGTTACTGTTGATGACT	TCTTTACACTGTCAGGTACC
TGACTCAACCCTGTAACCATGCATA	TEDH-1024950	EP300	GGGCAGCCTGGCATGCCCCA	CTTAATGGTAGAAAGATCCA
TAGGAAATGGGCCCTGATTGGAGCC	TEDH-1024949	EP300	TGATATTGTGAAGAGCCCCA	GGTTGCAAACGGAAAACCAA
AACAACCGCATCCTTATTCAAGCGA	TEDH-1024951	EP300	TAATGGTAGAAAGATCCATG	AGGCCAACCCCATGGAACAA
CTGGGTACATTGAACGCTCAGTGGA	TEDH-1024957	EP400	GCCATCTCCGGAGAGGCTGG	ACCCGGCGTGCTGCTCCCCG
AGTGTAGTGGGTTGCGAATTACGCC	TEDH-1024955	EP400	CCAGGTGCATCAGCGCATTG	GCAGCAGTATGACCCCTCCA
ACGTCGTAATCTGAGGTTTAAAGGA	TEDH-1024953	EP400	GATACCGCGGAAACTCATGG	CTCCTTCCTCACGTACACAG
TTACTTGAAATCGATTTTGATGAGC	TEDH-1024956	EP400	GACAGGGCCCACGCTCTGCA	TCGAAGGTAGGGCTGCCCGG
AATCTAGCTTCATGTCTGAGTATCG	TEDH-1024954	EP400	CCAGCTCCGGCAGCTCACAG	GCATCAGCTGCAGAGGTCCA
TGGTGTGTGTTCGATCGATTGAGTC	TEDH-1025285	ERCC1	GAGGGACCTCATCCTCGTCG	GCACATTGATCCTCGCCTGG
TTCGTTGGTTCGGTTTCAATAGCTT	TEDH-1025282	ERCC1	ATTTGTGATACCCCTCGACG	ATATTCGGCGTAGGTCTGAG
TTTGTCTGGGAACGCACCCCGGGCT	TEDH-1025286	ERCC1	ATTACGTCGCCAAATTCCCA	GGTACCGCCCAGCTTCCTCG
TCGGGGGACTGGTTGTCGCGCTTCC	TEDH-1025284	ERCC1	CCTTGTCCTACCACTCCAGG	ATCCTGTTATCCCAGCCCCG
TTGGACCCCTTCTGACATCGGTAAT	TEDH-1025283	ERCC1	GCCATCTCACAGCCTCTGGA	CCCTGCTTACCACATCCACC
CAAGGCCGCTTGGGCTGTTAGTAAG	TEDH-1025289	ERCC2	GGCACCGGTCAAGGGTCCGG	TTATCGGCAGGCATATCCGC
CGCGATTGTGACGAGTGCGAGCTGG	TEDH-1025290	ERCC2	CTGCCCGACGAAGTGCTGCA	TCTCTGGTATGCCATGATCA
AACATGATGTTTTGAGCGGATAATA	TEDH-1025291	ERCC2	GAGTATGCAGCAGGGACCGG	CCCGCACATAGGAGGCTGTG
GTGAGGGGGCCCATTACTCAGCAGG	TEDH-1025287	ERCC2	CCAGGAAATGCTCGGCCGTG	GGGTGGCAAAGTTAGCAAGG
AGATAAGTTACTGTCTTGGGTGTAG	TEDH-1025288	ERCC2	GCGGGAGCTCAAACGCACGC	CAGCACTTCGTCGGGCAGCA
TTCCAACTTAGGTCACACTGTTGAT	TEDH-1025296	ERCC3	TCCCGAGTGACAGATCCACA	AAATGGCTTACTCAACCAAG
TGGCTCTGAGTTAGCGGGGGGTGGC	TEDH-1025293	ERCC3	ATATGCCCAAGACTTCTTGG	CCAGGCGTCAGGAAGCCCAA
TACAGATTGATCACGATTAACCTAG	TEDH-1025294	ERCC3	ACTGGTATCCCAGGACACAC	AGGGCATGCTTACCACCCAG
ATGAGCCTGATTTATGGCCAGGCCA	TEDH-1025298	ERCC4	GTAGGTGGCCAGGAACAGAA	AACGCTATCTCACTGCTTTG
GGGGGGTGGGCTCTGGGGCGCGACA	TEDH-1025300	ERCC4	CCATCTCTGATCCATCGTCG	AAAATGAGTTTACTGCTACA
CTTCTGGTTGGCGCGCGGGATGTTT	TEDH-1025299	ERCC4	ATTCTGCGATGTTCTTAACG	GTCAAACTCAATCAGAAGCA
GAAGCAGGATGCATGTCTGTTCGGA	TEDH-1025305	ERCC5	AGTGATAGTGATGACGATGG	TCGAAGGGATCCTTTCTGTG
AGTGGCTAAAGGGTGGGGTAGACCT	TEDH-1025306	ERCC5	CCTTCTTCCAGCAAAATGCA	CGAGGCCTACCTCAAACCCG
TAGGGCTGTCTAGTTCGGTTGCTCT	TEDH-1025303	ERCC5	TCTAAAGGAAAGAATACATG	TGTGGGTTGTGTAACCGCCA
TGGAATCTGCCACTGACTGTTCCTG	TEDH-1025307	ERCC6	CACTGAGGCTCTCTCGTCAG	TGATGGCCAGGCCAGCACCA
TCGCATTCCTATGATTTGGCATCTG	TEDH-1025311	ERCC6	TGGTCTCAGATGTTTCTCCA	GCTTAGGTGTCAACCTGACG
GGACTGAGTGCACGTCGACTAATTG	TEDH-1025308	ERCC6	GTTCTCCGTCCCCATCACCA	AGAATTGCCACTCTGAACGG
GCACAGTTTATTTTGTCTAGCGGTT	TEDH-1025319	ERCC6L	TTCACCAGACAAAGGCTCAG	GAAGATCTCTGGCTTCTAGG
TTCTGTTCTGTTTTTAATGCCCCTG	TEDH-1025321	ERCC6L	AACAAAGAACTAGAAATGAG	AAATCAGAAGTAAAGCTAGA
ATCCTAGGCTCGGACTTAAATCGGG	TEDH-1025317	ERCC6L	ATGACATCAGTCCACCAGGA	AACCAATCTTATTAACACAT
TGCCGGTTCGTAAAGGGGAGCGATG	TEDH-1025320	ERCC6L	AGTCTTTGCATGCTGCTCAG	AACCTTTCATGGTCCTAGCA
TACAGGCTACGGTGCCTTTGAACGG	TEDH-1025326	ERCC6L2	TTGAGAGACTACCAAAGAGA	CGTGCTACAGCAGTACTGTA
CGCGCAGATTTTAACATCGTAGTAC	TEDH-1025323	ERCC6L2	AAGCATAAAATCTATCACAG	GTCGGCGCCACAGCCCCGCG
ACGAGTATAGCTTTTAGGTCGGCGT	TEDH-1025325	ERCC6L2	CAGTTGTAGAGGACAGAAAG	TGTAAGGTAACTGAGATACA
ACTAATTTGTTAATACGGTATGTGT	TEDH-1025328	ERCC8	ACAGCAATGGTGCTACCATA	TGATGTTCACAGATACAGTG
TATCATGGTAAATAGTACTCCGTTA	TEDH-1025330	ERCC8	ACTATATCTTGGCAACAGCA	TCCTGTTCTCACATTCTACA
GACGGTACATAACTCCTGTGTTGAT	TEDH-1025329	ERCC8	TATCTGTACCAACAGTGAGG	AGACTGCAACATTCTGGCTT
AGGATGGTTAGGATCTCGGACGCAA	TEDH-1025327	ERCC8	TTGGTACAGATAATCGAATG	ACAGTGTGGAGACTGTACAG
CTGGCTGCCCTTTTATTTATTCCTG	TEDH-1025331	ERCC8	GTGAACATGCCAGTGTCATG	GCCAAGATATAGTCATAACG
GGAACGAAGGTTCGTAATGGCGAGG	TEDH-1025525	ESCO2	GTACCAGAACCTGCAGTCTG	AACTATTAAAATTATATACG
CTGGGTGGTCTGGCTAGGCCTGCTT	TEDH-1025527	ESCO2	AATTGCAGAACCCATCAAAC	GACATTTAGGAACAACTTGC
ATGGTACAAGTTTGGCGGGTCGACG	TEDH-1025528	ESCO2	AGAACTTGTTGATAATGAAT	GCTACTGTGTGCAAGTCTTG
AGACATAGATACCTTTTCTCCTTCT	TEDH-1025616	ETAA1	TGGATCATTAGGAGAACTGA	GAAAACGCCGCACAAAACAG
GCGACGGGGGGGGGCCGAATGAGGG	TEDH-1025615	ETAA1	AACGCCGCACAAAACAGTGG	GTGCAGTAAAAGTAACCCCG
AAATTAAATTTGCATTTCTCATTCT	TEDH-1025617	ETAA1	AGTTCTCCTAATGATCCAGA	TCTGATACCAAAATTACACA
TATTAATAGTAAATGGACGACCTCA	TEDH-1025614	ETAA1	TCTATGCTGGACATGTGGAT	ACTCTACTGAAGCTTCTGAA
TTGTATATGTCCGGATCTTGCTCTT	TEDH-1025789	EXD2	GAAGCTGCTCCGGAAATTCG	GAGCCTGCCTACTCAGCGAA
GGTAAGACGGGGGGTCTCGCGGTGA	TEDH-1025792	EXD2	AAGGATCCGTTCCTTCCACG	CCAGGAAGTGCTGACGCCAG
AGACTAGTCTATGGTTTAGGAATAT	TEDH-1025791	EXD2	ACCTCCGATACCTAGCCATG	GGGCAGGTGCTTGGGCTGCA
CCTGTGAGAATAGGTTGTGGGTTTT	TEDH-1025790	EXD2	CAAACCACACCTCTGCCGCA	CTTCTATCACAAGTGCAGAG
CGCTTAAGCGGGCGTGAGAAATCAT	TEDH-1025800	EXO1	CCAAAGGTGAACCTACTGAT	CAGCTTCATAGGGAGCCACG
AGCCAGTTTAATCTAATCACGCTGA	TEDH-1025799	EXO1	GTGACAGCAGTTTCATCCAG	TAGCAATCCCTGTATCCCCA
AACCTGTTGATTAGGATTGATAGTT	TEDH-1025801	EXO1	TGTGTCGCAGTTAAAGAGCG	GATGAATATCACGGTACCAG
TTCGGGACAATATTATGTCCTGAAT	TEDH-1025803	EXO5	TGTGAGTGGAGAAAGGGCAG	GATGTGCCCTTCTGACTGCA
GATGTGAATCGTTGGAGCATTGGTT	TEDH-1025802	EXO5	TTTAAGGTGGAATCTCTCCA	TCCTCCACGTCAACTCCCTG
GCTTTCTGAGGTCTAGATGGCCGAT	TEDH-1025805	EXO5	CCAGTGTTTGGGGAAGGGGA	TGTGGTGGATTAGGCTAGCA
CTGACTGTCGGTTATAGGCTGGTCG	TEDH-1025804	EXO5	GATTGTAGCCTTCAAAGAGA	CCTATGCAGACATTTGTGAG
CCCAGAGTTTAGTAGAGTCTGTTGG	TEDH-1025954	EYA1	GACCGACTCCTGGTTGACAC	TTACAGGTACTCCAGTTCCA
TGTATGCTGCGTTCGCGCTACCTTA	TEDH-1025955	EYA1	TTTCAGGGCCAGTGTCAACC	GATTCTGATCGATTGCGTCG
ATGCGCTCTATTTAGGCGCTAACTT	TEDH-1025956	EYA1	TCAAAGGTTTGGAAGAAAAG	GGTTCAGATGGGAAATCACG
GAACATGTATGAAATTTCGTTTTTA	TEDH-1025960	EYA2	ATTTGCATCCAGATACGGGA	CGAACTGTGGAAGCCGTCAG
ACGTCTAACTGTTGAGGGGCTGCCA	TEDH-1025959	EYA2	CTATAAATACTCCAGCTCCA	CTGGGCTCTGGCGTGCACGG
AGAGTTTTTATAGGTTTGGAGGATC	TEDH-1025961	EYA2	CGTTGTGAGATGCCTCCTGG	ACCGTGCTGACGCTGCTGTG
GAAGCCTGGGGCAGAGCGGGGTGTA	TEDH-1025957	EYA2	TCTGTTCTTCAATGACCTGG	TCAGTGCCTCCAGGTCTGCG
GTTCGGGCATTGTCGTCGTACTCAC	TEDH-1025963	EYA3	TCTGGTATTGAGTCTGTCCA	AACATGACTAGCAAGAACCG
GATGCCTTTAACGGTTAATGTAGAC	TEDH-1025964	EYA3	AGGCTTCTCCGACTGGTATG	GATTGGCTCAGGTTTAACAA
GCAGCTTCTAGGCCCGCTATGTGAA	TEDH-1025962	EYA3	CCTTACTTCTCATCCAGTCC	GAACACCCACAGATGAACCA
CGTTATTTATATTTCTATAACATTG	TEDH-1025966	EYA3	AGGATCCAGTAAGAAGTGAG	GTATAATCATTGGATGAGCG
GCTGGGTGATGGTTGGCATACATAT	TEDH-1025970	EYA4	TTACACCTGTTGGCAAACAA	GACTCCTTGGCCCTGCCAAG
AGTGGCGGTCTACAGTAAAGAATCT	TEDH-1025971	EYA4	CTTACAGTAATTACAAGTAG	CACTGTAAATATTCTCAATG
TAATGGTCTATTTGTCTTGGGTAGT	TEDH-1025969	EYA4	GCTGGTGTAGAAAGAATGTG	GGGTGTGGAGGGACTCTGCA
CGCCAAGCACTGAGCTGCATACCAG	TEDH-1025985	EZH2	TACCATAAAATTCTGCTGTA	GCAAGAACTGCAGTATTCAG
GGGGGTAATATTGACTGGAAGTGTG	TEDH-1025986	EZH2	ACCAAATGCTGGTAACACTG	CTGCTGCTCTCACCGCTGAG
CCTACCTGCTTGGATTGCATATATG	TEDH-1025982	EZH2	ACCCCACCAAAACGTCCAGG	TGTGGTGGATGCAACCCGCA
TCTGATCAATGTCATGCCAATGCAT	TEDH-1025984	EZH2	AAGAACTGCAGTATTCAGCG	GCCCTTATCTGGAAACATTG
GGATCGTGGTTTTGCCATGGGCCAA	TEDH-1025983	EZH2	TTTACTGTCCCAATGGTCAG	TGGGGTCTTTATCCGCTCAG
TGCAGGGGCTGGTAGACGGTGCCCG	TEDH-1026166	FAF1	CGTTCGCCACCAATTATGGG	TTAACACACTTTCATCATGG
TAATGTCTGGGAATTTTCCAGATGT	TEDH-1026164	FAF1	GCATGACTAGATGATGAAGG	ACTTGAGGCTGACAGAGCAA
CGGAGTTTCCTCCGGGGTTTGTCGG	TEDH-1026162	FAF1	GCTGTTAAAAGGCTGGAAGA	ACAGGAAGATATAAAGGACG
TTTATTTCGGAAGAAGAGCACCCTT	TEDH-1026163	FAF1	GGACCGGGAGATGATCCTGG	CCCACTGTAAGTCGATGGCA
GGAAGTATCTTGTGGGCCCGATCCC	TEDH-1026348	FAM122A	CCAATTCCCCGAGTGGGTGA	CTTGTTTGATCTGGTGCAAG
TTAGAAATAAATTTAGGTCTCTGTT	TEDH-1026349	FAM122A	GGACTTGATCAACCGAGAGA	ACTGAGGCCGTGGATCAGGG
GTAATGTAAGTAATCCTAGTAGCAA	TEDH-1026346	FAM122A	GCTGCTGTGCATGCGGACAG	AATGAAATCGATGCGCTTGG
TAGAGGAAATATTGGAGGTTCCTGA	TEDH-1026345	FAM122A	TGCTTCCCAATTCCCCGAGT	CGGTCTGCACCTCCCGTTCG
AGCCCCCAGGGCTTGATCGCGGTTC	TEDH-1026707	FAM175A	AGATCATGACGTTTAGAGAG	ACCTGTGTGTTTGTACTGCT
GCGTCCCCTACTTGCTTGGATTTTC	TEDH-1026705	FAM175A	CGAGAAATTGAGAAAAGGAG	TATTTCAGAATGTGGTAGGT
AGAGCCGACCGCTGCCCGTAAGCAG	TEDH-1026708	FAM175A	GAGGCGGCGGTAGCATGGAG	TGATCTGATCTGAATGACGA
AGCCTATAGGGCGGAATGTATGCGT	TEDH-1026713	FAM175B	CCAAAGTGATTAAAGAACAT	CACTATTAGAAGGCTCTGTA
ACTCCATTTCGAATCACGTTGGGAG	TEDH-1026714	FAM175B	GCCAAAGTGATTAAAGAACA	ACTGGGAGAGGTAAGACAAG
TGAGTGGTGACCGGTCACTTAGGTG	TEDH-1026725	FAM178A	TCTGGCTGAAGATTCTCCAG	CATAGTGATAAGCAGACGTA
ACCATTTTCCTTTTAGCTGGGGAGC	TEDH-1026727	FAM178A	TAGAAAGAAAATATAAACCA	TCCCCTCATCCCCAGCCCCG
CACGAAAGGCCTTTGGACAATAATG	TEDH-1026726	FAM178A	GGTCTCAGATGGCAGCGCGG	CTAATTGGACATCACGTGGA
TATGGTTGAAGGTTAGGAGACTCTT	TEDH-1027143	FAM35A	CAACAACTCTTAGTACTGCG	GATCACCTATGGGATGGTCG
TCGGCACGCAGGGTATGGTTTAGTG	TEDH-1027144	FAM35A	CAAGGTCTGAAGCAGCAGTT	TTATCAGAAATCATGAGTGG
GGGTTTGAGTTCTTCCTTCGGGCTG	TEDH-1027147	FAM35A	AAACATCAGCCAGATATATG	CATTATGCGCTTGTATTATG
TCTTTAGCCGCCTAGACCCATCACG	TEDH-1027561	FAN1	ACTGTGGATTTGGAACTCTG	ACTTCGTTCAAGTGGATCCA
TTCTCATCATAAGAAGTAGAGCTTG	TEDH-1027562	FAN1	TGCCGGTTTAAGTCATATCT	CTGATTGATAAGCTTCTACG
TGAAAATCGATGTCGTCAGTCGCGA	TEDH-1027564	FAN1	AATGCAGGCTTTCTACAGAC	GCACCACAAGGAAACTCCGA
CTGTTCGGGCACTTTCCCGTGCTCA	TEDH-1027566	FANCA	GCACCTCACGATCTTGTGAG	GTGTGGCATCTTCACGTACA
TATGCGGATTCAAGGATCTCTGGTC	TEDH-1027569	FANCA	TAGCGTGGGACAGATCTGCA	CTTTGCAGGATCAAGCCTCA
TAAGTTGAGGGTAAATTATGTATGA	TEDH-1027567	FANCA	CGGGATGGTTGCCTCTAGCG	CGCCCACCTACCCAGCAGCT
GGCGCCTTCGCGGGCTGTGATAGGA	TEDH-1027574	FANCB	TCTATGGGACACTCTTCACT	CAAATTTATTAGTACTGTGA
TCTTCCCGCATTTGACTGCGTTGCG	TEDH-1027572	FANCB	TGATAAAGTCACATCATTCA	CCTGACTTCATTTAAAATAA
CCGGTGTTAATTCGCTCCATAAGTA	TEDH-1027573	FANCB	TTCCTCTATTCAGTGGGCAG	CATGCCTCCATAAAATTAAA
GTGATGCAATGAGAGAACCCACGTG	TEDH-1027576	FANCC	CCTCCAGCCAGAGTTCTTTG	CCAACAGTTGACCAATTGTG
ACGGTAATGGATTGGTCGCGCACCC	TEDH-1027580	FANCC	AGGGTCTTGCAGCAGCACCA	TCTGCTGCCTCCCATCACGG
CTTGCGTTAACAGCCGGTCAACGTT	TEDH-1027577	FANCC	GAAGGCCAAGAGCCACAGCA	AGATGAGGAGAGCCTCCACC
CGACATTGTGGATTGGAGCCTTAGC	TEDH-1027579	FANCC	GTCTGGAGCCAGTGTCCCCG	ACATCTGTCAGGGTAATAAG
AGAGGAATGCATTTAAGCCTCGTTG	TEDH-1027585	FANCD2	AACACAGGAGTCCACTACGA	TCCCTTACCTGGTCAGTGTA
CCTAAGATGAGGGCATTCACTCGTC	TEDH-1027583	FANCD2	TCCACATCAAAGTTTCCAAG	TCTGCAAACTAAAAGTTCCA
ATATATTAATACTTGGTGGGTTTCC	TEDH-1027584	FANCD2	TTCATCATAGTAAAGTGCAG	GAAACATCACCTGAGATGAA
GGACGGCGCGCCCTGATGACATTGT	TEDH-1027592	FANCE	AGCTCCAAAGTCTATGTAGG	GATCTTGGAGCTGCCCTGGA
GCATTCGGTCTGGTGATCGAAACAG	TEDH-1027591	FANCE	CACCTACCCGTCCAAGAAAG	TTTGGCACAGAAGGAGGTCA
CGTGACAGGGACTGAAGTCGCCCCC	TEDH-1027594	FANCE	CAAGGAGGGCGCTGCAGACA	CCCAGATCACTGAGACCCAG
GGAGGTGTTTACCACGTGAGTGGCC	TEDH-1027593	FANCE	TCAGGGCAGTTGTAAGCAGG	TGGCCGAACGGCCATCAGCA
CAGCGGCGCCCTGAGGCTTCAGGTT	TEDH-1027599	FANCF	CAGGCTGCTGAGAAACCTGG	GCACAACCAGTGGAGGCAAG
CGTTATAAATGGATGGGTACCTGGA	TEDH-1027598	FANCF	GCATTGCCTATACAGAACTG	GAGACCTGTAAAGCGCAGGA
GCTCCTATCAATGGTTAAGTCGAGC	TEDH-1027597	FANCF	CAGACCGCCGGCGGGCAAGG	CCGAATTCCCCAGAAGCCAG
TGGTAAGGCGCGGAATGCTTATACC	TEDH-1027596	FANCF	GCGATCCAGGTGCTGCAGAA	GGTAACGAGCTGCATCCCCG
GTTAGGCAACCGTTTCTAAGGGGTT	TEDH-1027604	FANCG	CCAAGCACATACTAGCAAGC	GCAGAAGGCAGGAAGCACGA
CGGTATGACACCGTGTGGGGCCCGG	TEDH-1027601	FANCG	TGCGGGGCTTTGGAACTGCA	TCTGAAGAGGCTAGATCGGA
GCATAACTCCTTCCTGCAGTGTTTG	TEDH-1027605	FANCG	GAGATGTCCGAAATTCTTCA	CTAGCCTCACCCCTTCATTG
TGTTGGGGGTAGTTCCTTGTTTTCA	TEDH-1027609	FANCI	GGCACTGCATCAGAGCATGG	CAGCCTTTGTACAGTCTGAA
CCGGGGGGGGCACAGGCGATGTGTA	TEDH-1027610	FANCI	AAGAACCGTGACTAGCAGGA	GCATTTCTAGGTGTACTGAG
GTCTGAGGATTTTGCTGTACGCCGA	TEDH-1027607	FANCI	GTGTCCACACAGCTGCCTGA	AAAGCTATCATCATGCAACT
GGTTGGGAGCGAGTGATATGGAGGG	TEDH-1027608	FANCI	TCTGCCATCAGGCAGCTGTG	CCACCTTTCTAAGAAGTCCA
CACTAAGTTGCTCGGCCCACAGATG	TEDH-1027614	FANCL	GCTCCAAGAAAGAAGCACTC	GTGTGTGATAATTCTCAGTG
CGCGTAGGCTGGCTGGGGGATGAGA	TEDH-1027612	FANCL	ATCACACACTTGATCAGGAA	CCATCAAATATGCTTATATG
ATAGACATTGTGCCGGCGCGCGTGG	TEDH-1027611	FANCL	AAGCACTCAGGAAGCATAGT	GCTCACCAGACTTGTGTATG
CCCGGGGAAGGAAGATGGTCGTCGG	TEDH-1027613	FANCL	TATAAGCATATTTGATGGAA	ATTTACCTGAGGTGTCCAGG
ATTGCTTCTACTGGAGATAGTTTTT	TEDH-1027616	FANCM	AGTCCACGAATGGTTCCTGA	CGTGAGTAATCGCATGGTGG
AGGCAGCTCGAGCTTGGAGTTATTG	TEDH-1027618	FANCM	GTAGAAATTGTACATGACCA	ATTGGTAGGGTAAATCCACA
GCTGCTTTGGTTTGAGTTTGTGTGT	TEDH-1027619	FANCM	ATCAACTCTCTCTCTCTGAA	GCATAAGGCCTATAAAATGG
ACGTAAGAGTATCAGCCCGCTACCT	TEDH-1027617	FANCM	TGGCGGGTTCTGCACCTCCG	AGAACTGGCCGTAAACGTCA
GGCCAGTCAGAGGCGCTCCCAATGA	TEDH-1027933	FBXO18	ATTTGGTGTAAGAACAGCCA	CGTGTTTGCCTTCCTCCCGG
GGCGGTATACACAAGGTTCTGTTCT	TEDH-1027931	FBXO18	ATAGTTCTGTCTCAGCCATG	TCTTAGAAACTCCATCCCAC
TTTTGTGCACGTGGTTCATTATAGA	TEDH-1027932	FBXO18	GAGTTTCTAAGAAAGCTCCA	CAGCAGATCTATACCTTCCG
TAGGATTTATGTGTCTACTGTTCGG	TEDH-1027934	FBXO18	ATCACCACAGAGCAACAGGA	ACAGGGCGTTGACCGCACCC
AAGGCCCTAACGCAATCTCCTACGA	TEDH-1027946	FBXO22	GATCTCCGCAGGCCTGGCGG	GGTGCTCCGCGGGTCTACGG
AGGGGTCGTATTGAGAACGCACGGG	TEDH-1027949	FBXO22	CTTTGGTTATAATTGCTGTA	ATTAGTCTGGAAGAGTGTCG
TTTATTGCGGTGAAATTTATGCTAG	TEDH-1027945	FBXO22	CATCTTGGCTGGAGGCCAGG	GCCATGTAAAGAACTGTATG
TAAGATAAATCATTTAGAAATTCAG	TEDH-1027947	FBXO22	GATCCAGGTTACGCTCCGAT	CTTCGTGTTGAGTAACCTGG
ATAAATGCGTAAGCCCCTCATATTG	TEDH-1027948	FBXO22	CAGCGTGTGCCGCTTATGGA	GGGGCATTGCTTGGTTCGCG
CGCATGGGTCAGCGCTTAGAGTCCG	TEDH-1028124	FBXW7	GAGAGAGAAATGCAAAGAAG	GTAGTTTGATGGTATCCATG
TCAGCCGTAGCTTGGGTTATGGGGT	TEDH-1028120	FBXW7	CAGTGTTTACAAACATTGCA	TCTTTCTTATAGGTGCTGAA
TAGTCTGGATACCCTTCTCTCTGCC	TEDH-1028123	FBXW7	ACAGAATTGATACTAACTGG	GATGGTATCCATGTGGTGAG
TGACGGTCGCTGGTTGTTGTTTTGG	TEDH-1028342	FEN1	AGCTGGCCAAACGCAGTGAG	GCAGCAGGGAAGTTTAAAAG
GCCTGCTTAAGATTAAATTCGGCGG	TEDH-1028343	FEN1	GAGACCACCAGCCACCTGAT	CCAGAAGCACAAGAGCATCG
TTCGGATCACTAACACCTGCGCTTG	TEDH-1028341	FEN1	GACTTTGCCAGCCTTCACCA	CTTGCCATCAAAGACATACA
GCGCGTTCTTGATTTGCTGGTTAGC	TEDH-1028339	FEN1	AGAGCTGGTGAGCCTCCTTG	GAGCTGATCAAGTTCATGTG
TTCACATCATCCTGTCGCGAACGCG	TEDH-1028745	FIGNL1	TATTACGCATTCAGTATGCA	TAGGAGCTAGTAGATCCCGA
TGTTTAATTGGTCAAAGGGCAATGC	TEDH-1028746	FIGNL1	CCATAAAGGAAATAGTTGTG	AACAAACAGATAGTGACAAG
AGTTCTCTCATGTCTTGTCTCATAT	TEDH-1028744	FIGNL1	TTGCAACAGCAAACAATGCA	ATATCTTCCCAATTTACTGG
AAGCCCCGGCGAGTGCCGGTCCTTA	TEDH-1029355	FOXM1	ATAGCCTATCCAACATCCAG	CCAGAACCCCTGAATCCTGG
AATGACTTTTCCCTATCTATCTGTG	TEDH-1029357	FOXM1	CACTGATTCTCAAAAGACGG	CGTGAGCCTCCAGGATTCAG
CACAGGCGGTGCCTCGGTGTCCGGG	TEDH-1029358	FOXM1	GGCAGAACTCTGTGTCTGAG	CCATACTAACGTGCGCCCAG
ATCCCCCTAAAGGTGGGTGTGGGTT	TEDH-1029356	FOXM1	GGAATCATCTCACTCCTGGG	AATGCTTGTGATTCAACACA
GGCCTAGGCCCACTGTCTCACACGA	TEDH-1029374	FOXN3	TGTCAGGCAGAGAAAAGTCG	GGTCCCTCCTGCACTTAGCA
CATTACTGATCTCTTTTATAGCGTG	TEDH-1029370	FOXN3	GAAGCGCCAGCACTTCGCCA	GCCATCTTGTGGCTCCCCAG
TGCGAATGGCAAGGTTCGACTTGGA	TEDH-1029373	FOXN3	GAGTGATCCAAAATGGAGCG	GGGCATGTCAGAGTGGGCAG
GGGGGATATTTTATGGCCGCCTACT	TEDH-1029389	FOXO3	TGCACTAGTTGAGTACAAGG	ATACTTGTTGCTATTGTCCA
GATCGCTACTATACAACCGTCAGGT	TEDH-1029386	FOXO3	AACCAGCTCCTTTAACAGCA	CGCCGACTCCATGATCCCCG
TCTGCCTTTGATGATGGTAAGGTTA	TEDH-1029385	FOXO3	GAATGTTGTTGGTTTGAACG	GCCGTCCGCGATCCTGTACG
ATCGTGCGCACCTGTACAGGAGTAA	TEDH-1029994	FZR1	CAGCAGCCCGTGCTGATGTG	GTGGCGGTGGGCACACACAA
GGGGCGTTAATTCCCGTGTTATGAT	TEDH-1029996	FZR1	GCCTGGTCCCCACATCAGCA	CATGGACAGCTTCTTCCCTG
GTACTCGTGTCTACCGAGGCGTTGC	TEDH-1029995	FZR1	AAGAAGCTGTCCATGTTGGA	TGTGTGTGCCCACCGCCACC
GTGACGGGGAAGATGTTAACATTGT	TEDH-1029993	FZR1	TGTTCCAGAAGCGGATACAG	TCCATCCTAGGGGAACCTGG
GCGGGGTCTTATGGCGAACGGCCGT	GABBR1_3	GABBR1	CCAGGATGCCCGAATCATCG	ACTTTTCAAAGAGTTTCACG
GGTAAGTTGATGCGCGCTTTTAGGT	GABBR1_1	GABBR1	GCGGAATGTCTTGATGACCA	AAGTACGTCTGGTTCCTCAT
TCAAGGTGCTAACAGCATTTCCCTG	TEDH-1030204	GADD45A	TCAGATGCCATCACCGTTCA	AGAATCCACATTCATCTCAA
ACTTTAAGATTCTGGGGGAGCTATG	TEDH-1030203	GADD45A	CGCTGGCCCCGCGGCGAGCG	AAAGTCGCTACATGGATCAA
GGTCACTGTCTTAGTGGGTGTGGTG	TEDH-1030200	GADD45A	TCCACATTCATCTCAATGGA	GCTGGCCCCGCGGCGAGCGA
TTTGGAGGTTTGTTTTTGAGCATTT	TEDH-1030201	GADD45A	GGCACAACACCACGTTATCG	AAGTCGCTACATGGATCAAT
TCCGTCAGTTGTCTTATGAGCCACG	TEDH-1030211	GADD45G	CGACATCGACATAGTGCGCG	ATGACTCTGGAAGAAGTCCG
TAGCATGCTCATGCCACTCGGCGGA	TEDH-1030210	GADD45G	TGCGGCTCTCCTCGCAAAAC	CACAGAAGGTCACATTGTCG
GAGCGAAGAGTGCACGAGGTGGGAG	TEDH-1030212	GADD45G	TTTGGCTGACTCGTAGACGC	GACATCGACATAGTGCGCGT
TTTGTGGGCAAGGAGGCGTGCCGTG	TEDH-1030213	GADD45G	CAATGTGACCTTCTGTGTGC	CCGAAATGAGGATGCAGTGC
ATCGTTAACTACTGTGCGATCCACG	TEDH-1030522	GAR1	GAGAAAGGACCTCCAAGAGG	TTTCGAGGCGGAGGTCGTGG
TAGGTACTGGGTTTTATGAGTCATA	TEDH-1030521	GAR1	TGTCATCTTCACAGGGATGC	GGAGGTCCTTTCTCACCTGG
GTAGGCTTCCAATGCTGATCTCTAT	TEDH-1030523	GAR1	CCCCTGCCACCACCTCTTGG	TTAGAAAACAAAGAACAAAT
ACGCACGCCAGTAGGTCTCTTGTTC	TEDH-1031046	GEN1	GGCACCGTACAGAACATGAT	ACTTAGCTTTCCCAAACACT
AGTTTCTAATGGCGCCGTCGGGATT	TEDH-1031043	GEN1	ATCCCCTTGCGTAATCTTGG	AATGCTGGTGGTCATGTCGA
TGCCGTGCCGTCATGACATTGAACA	TEDH-1031045	GEN1	AAGTTGATATGCAAACCACT	TCCCACCAAGATTACGCAAG
TGCGATCTGACGCGCGCTGTGGTCC	TEDH-1031573	GLG1	GTTTAAAATGGCCTGCAAGG	GATGCAGCGCCGCCGACAAG
GAGCAGACTGGGTCCGGTGGGCCGG	TEDH-1031575	GLG1	AGCGTTGCCATATTGCACAG	GATACAGAACAAACACCAGA
CCCCCTTTTGAATGATTGCCCCTGG	TEDH-1032527	GPI	CACCAAATCTGGAACCCGTG	TGAGAAGATCAACTACACCG
ATGCTTCCGGTGGACCGTCCTGGCG	TEDH-1032528	GPI	GGCGCAGGTTCAGCTCGGAG	GGAGGCAATGATGAACAGGG
TTCCGCAAACAGCCACTCCTGTACT	TEDH-1032531	GPI	GGCTGCGGGCAAGAGTCCAG	ACATCAACAGCTTTGACCAG
GGGAGTGGGACGTCAAGGATTTATG	TEDH-1032530	GPI	GAAGGAGTGGTTTCTCCAGG	GAGGGGAAAATCGACGGAGG
ACCGGGAGTTTGTGGGTAGTCGGCC	TEDH-1033018	GPS1	GATCCACCGCAAGCTCTCAG	CCAGGATCTGGAACAGTACG
GAGTACTGTTGTTGGGTCTTGCTTT	TEDH-1033020	GPS1	TGTGGACTCACACAGCAAGG	GGCGGCAGCCTTCAATACCA
TGGGGGGAATCCGGGATTTACGTCC	TEDH-1033017	GPS1	GCTGACGCAGCTAATCCTGG	GTAGATGGCCACGTTGCTGG
TGGTGGAAAGTGTCAAATCGGTGGT	TEDH-1033674	GTF2H1	ATTCCTTCTCTGTCATGTTG	GGCCAGAAAATTAGTCCAGA
AGGTAATGAGATGTGTTTTGCTTCC	TEDH-1033673	GTF2H1	GGAGGGGCACTTATGCAGGG	CGTCTGATGAAGAAAACGTG
GTCGAGTAAATGTTGAGCGGGGAAC	TEDH-1033676	GTF2H1	CCAGGACCATGGCACTGTGA	ATTGGAAGCAGATGGCACAG
CCACAGGAACATGCACCCACTGATG	TEDH-1033681	GTF2H2	AGAACTAAGCGATGGGAAGG	AGTAGATGGATCAAGAACAA
ACTGTATGTTTTTTATAAAGCTCGC	TEDH-1033677	GTF2H2	GATGGTAAGACCGTGCCAAG	TTCCAAGTCGAACTTGTCCA
ACAGCAAGTGTCGGCGAAGCAATCG	TEDH-1033680	GTF2H2	ATAGATGCGCCACCTTTATG	AACAGAGTATTTGAGCACCA
GGGGTCGTTGTCTGGGTCCGAAAGG	TEDH-1033678	GTF2H2	CATTGCTTCTTTATCTGACC	GAGCCAGGGCTTACATTAGG
GTAGTTAGAGGTTTGGCTTGGGCCT	TEDH-1033693	GTF2H3	CCCAGTTCATGTTGACTACA	TGCTATCACAGCAAGTTTGT
GTCGGTGCATGTTACTGGTCATGAG	TEDH-1033696	GTF2H3	ACAGCAAAGGGCTTTGGCCA	ACAATCAGGAAATGAAATCA
AATAGCCCACGGGAAATATAGGGCT	TEDH-1033692	GTF2H3	ACTCGCACGTAGTACAAATG	AACTTTGCTGGCAGGATCCC
TGCCCCTCTAGATGGCCATACTGCG	TEDH-1033695	GTF2H3	CAGGCTTGTGACATCACGGG	CCCTGTAGTCAACATGAACT
CGGGGTGATTGAACGGAGTGGTTCT	GTF2H4_2	GTF2H4	GCTTACCTCCCATCGCTCCT	GAAAGTACAGGGCTGCTGAG
TGCCCTAAGACCTGAGACCGTGTTC	GTF2H4_5	GTF2H4	CCAGCGGAAGTAATGCAGGG	ACAATCGGTCCAATACCCCA
CGGTATATTCCCGTTCCTCCGGCCA	GTF2H4_4	GTF2H4	ACCCACCCAGAAGGGCAATG	GTACAGGGAGCTCCCATCCT
CAGGAATTAAACCTATTTGTATCTG	GTF2H4_6	GTF2H4	CCTTCCACAGAGTAATCCTG	AGACAGCCAGACATGTGGCA
ATTAAAAATGTCGGCAACTGGGCAT	TEDH-1033700	GTF2H5	TGAAAGGAGTGCTTATAGAA	TAATGTCCTCCAGGAGCGAG
TCGCCATCTATCACGACTGAACCTT	TEDH-1033698	GTF2H5	ATTCACCCACTCGCTCCTGG	AATGATGAACTTCTTCCCCA
GGATGCTTGGTTACGCGGGCTAGTG	TEDH-1033697	GTF2H5	AACATGGTCAACGTCTTGAA	GTACAGCAGAAACTGCTTCA
TGACTCTGTAGGCTTCGAGGGTATG	TEDH-1033699	GTF2H5	AATGTCCTCCAGGAGCGAGT	TGGATGAGTCCAATGCCCTG
GGGTTTCCCCCCAAAGCTTTCATGG	TEDH-1034009	H2AFX	CCTGGAGCTGGCGGGCAATG	GGTGGCCTTCTTGCCGCCCG
ACTGGTGCTGTGGTACCTGGCTTAG	TEDH-1034011	H2AFX	GGGCGCCTTCGGCCCCACGG	GTACACCGGCTGCTGCGGAA
CACAGGAGGTTCGGGTAATTCACAG	TEDH-1034010	H2AFX	TCCGCAGCAGCCGGTGTACA	TGTTGGGCAGGACGCCTCCC
GTGCCTGCCTAGGTAAATCTTGATA	TEDH-1034018	H2AFY	CTTCCCACCGCGGCTCGACA	GTACCGCAGCATCCGCCCCA
GAGGTTCTTGTTAATTTGGTGACCA	TEDH-1034017	H2AFY	TCTTCGCTAGCAACTCGGGG	GGCAGACCTGGACGTCTTGG
GTCGCGTGAACGATAGATGGCGTGT	TEDH-1034019	H2AFY2	AATCCAAGGCTGCCAAACCA	CCTTACCTATATCTTCTTTG
TGATCAGGACGCTTTAAATCGGACT	TEDH-1034020	H2AFY2	AAAGCCTTGGAAAAGGCTGG	GCAAGATGTCGGGCCGGAGT
CTGGCTTGCCGTAGCTCTGTGCATT	TEDH-1034021	H2AFY2	CAATTTCGGCTGTGGTTGGG	CTGATGCGTTATCTGAAGAA
ACGACGTATGCGCATCACCCTTGGA	TEDH-1034023	H2AFY2	GGGGAAAGGCGGGAACGCGA	AATTGGCCGGCAATGCCGCG
TCGCATCTGTCTGTTTATCGGACGC	TEDH-1034024	H2AFZ	AAATGCATCAAAAGACTTAA	GATGGCTGCGCTGTACACAG
ATGTAGGCAGCTGATCGGCTGGGTA	TEDH-1034027	H2AFZ	GTTTCCCGCTCGCAGAGAGC	ACGACCAGTCATGGACGTGT
ATGTTGCGTCTGGGGAGGCTGCTAC	TEDH-1034028	H2AFZ	CGTTCACCCATTTACCTCTG	CTTAAAATTTAAGTTCCCAG
CTGGGCCGCGTGGCTTGGTCCATAA	TEDH-1034040	H3F3A	TTCTCGCACCAGACGCTGGA	AGAGGGCGCACTCTTGCGAG
TTTTGGTGGCGGGAGTAACGAAATG	TEDH-1034042	H3F3A	TCTGATAACGTCTAATTTCA	GCAAGTGAGGCCTATCTGGT
AATTGTACCGCGATATTCTTGTCAG	TEDH-1034043	H3F3A	AAGAGTGCGCCCTCTACTGG	AAGCACGTTCTCCACGTATG
TTCGCGAAAGATCGGGTATCACAGA	TEDH-1034048	H3F3B	CCGACCTACCTGTAGCGATG	AGGTTTCAGAGCGCAGCCAT
CGGGTTGAAAGGGCTATGGGGTCGG	TEDH-1034046	H3F3B	GTTGGTGAGGGAGATCGCGC	TATCTTCGAACAGACCCACC
GGGCGGGGCCGAGTGCGCGCGTGAA	TEDH-1034044	H3F3B	TCTCGAAGCGCCACGGTCCC	TCTTAGCGTGGATGGCACAC
AGCGCGCGAACGGGTACCTTTTAGT	TEDH-1034424	HDAC1	GATTGATGACGAGTCCTATG	GGAAGAGGCCTTCTACACCA
CATGTTCTTTGTCGGGACTTGGGTA	TEDH-1034427	HDAC1	GACGCCATCCCTGAGGAGAG	GAGGACTGTCCAGTATTCGA
AAATTAACACCGAATTCCGCGCACC	TEDH-1034423	HDAC1	ATTTAATGTAGTCATCGCTG	CCTCATCGCCACTCTCCTCA
GACGGAGGTTTTCTAAGAAGTGTTC	TEDH-1034426	HDAC1	CGAAGAGGAGAAAACCAAGG	GCACCGGGCAACGTTACGAA
CTCATATTTTTTTTGCATACGGATA	TEDH-1034425	HDAC1	ACAGGCAATTCGTTTGTCAG	ACTCCGACATGTTATCTGGA
GATGCGCAAGTGGAGGTTGGAGTCG	TEDH-1034430	HDAC10	GGGCAGCTCTCACCTCACCA	GGGATGTGCACCATGGCCAG
CGGTGTGGCGAAGCCAGGACCCCGT	TEDH-1034428	HDAC10	CGTAGGCCTCCCGGGCACCA	CGTCTGCATCTGACTCTCGC
GCTCTTCGTGGATAGTGGATGGTCG	TEDH-1034431	HDAC10	CCTCCGTGCAGTCACCTCAA	GCGCTGCCGCAGGCGATCCA
CAGTACAAACCATTAGGGGCTGAAC	TEDH-1034439	HDAC2	TCCGTAATGTTGCTCGATGT	GGTATCATTCCATAAATATG
GGTTATTCGTTTCTTAGGAGGCTTG	TEDH-1034441	HDAC2	GATAAATCCAAGGACAACAG	CCCATGGCGTACAGTCAAGG
AATGTCAGGGACTTATTTTGCGGGA	TEDH-1034442	HDAC2	CCAGAACACTCCAGAATATA	ATAGCTTGCATCTGGACACC
ACAGCGGAAAGTTTACTTCGTAGGA	TEDH-1034443	HDAC3	CAAAGAGCCCGGGAAACACT	CATGTGCCGCTTCCACTCCG
ATTAAAAAGTTTATTTTTTAGTAGA	TEDH-1034445	HDAC3	TATGAAGTCGGGGCAGAGAG	TACACAGGCGCATCTCTGCA
TTACGTGGGGCGTTTCGGATAAGTA	TEDH-1034444	HDAC3	ATCCCTCTACTCGTGCTGGG	GTTGACATAGCAGAAGCCAG
GGTTTTCTACGGACATGCGGCTGAT	TEDH-1034446	HDAC3	AACCTCAGCATCCGAGGGCA	GGTGAAGCCTTGCATATTGG
ATTAAAGTATGTCGGACCTGTTAGC	TEDH-1034452	HDAC4	GGGGTTCGTGCCATACAGGA	GCATCAGCGTGTCATACACG
ATCCGTTTCTTATTGAGGTTGTCAT	TEDH-1034451	HDAC4	CGTGGGTTTCAACGTCAACA	AGGGAGCCGGACGAACACGG
CTCAATTGGGTAATAAATTTTCGGG	TEDH-1034448	HDAC4	TTACCCCAACACCACCGCAA	GGGCCTCCGGGGCAAATGCG
TCCATTACTTTGTTCCTCACTAGTT	TEDH-1034474	HDAC9	AATGCTGCAGGAGAGCCTGG	AGCTTTGATCCAATGATGTG
GCGGTTGATGGCGGGCCTTGGGCAA	TEDH-1034477	HDAC9	GCAATGACTTACATTGAGCT	GATGGAGATGTTCCACTAAG
GTTGTGTGGCACGCGCGAGGCGAGG	TEDH-1034476	HDAC9	CCTCAGGATGATGATGCCCG	GGTAATGTGTACTTGTAGGA
AAGGAATTGGCAGGACTTTCCATCC	TEDH-1034475	HDAC9	TTGATCCAATGATGTGTGGT	GCTTGTGTGGATGACACACT
TCCAGGTCCATTGTGGGCGAACACC	TEDH-1034473	HDAC9	TGCAGACTGGGTTCGGTTCA	TTTGATCCAATGATGTGTGG
TGTAGGGCTGACAGCGGCCGCTGGG	TEDH-1034626	HELB	TCATTGTGGACAATGCTACA	GCAGCGGCCCCTGGTCACGG
GACGTTGCTATATCGTGAGTGGGCT	TEDH-1034625	HELB	GTCTCCAGAGCTCTTCCGTG	AAATGATGTCACCTGGAGCG
GTCAGGGGATGCTTTTCTGTAGCTG	TEDH-1034623	HELB	GTCGAGGCAGAAGAACTGGA	AGATCCCTGGGTGGGAGCAG
CTCTGCACCGACCGCGTTCTACGGT	TEDH-1034624	HELB	TCCACTGGATCGGGATCAGG	GCAAACAGTTGTCTATGTGG
TGTGTCGACTCGTAGGTGGGCGGGG	TEDH-1034628	HELLS	AGCAGCTGCTAAAAGGAAAC	GTTATATCATGGAACCCAGG
AACGGCGGGGCGTGCTGCCTGACGG	TEDH-1034631	HELLS	AATGTTATATCATGGAACCC	CAGCTTCAACACGGATCCAG
GATATATATTGGTAAGGTACTAATG	TEDH-1034632	HELLS	ACCAAGTAGAAGGCATGGAA	AATAATTCCATTAATTCCTT
TTAGAGTATTATAGTTAGTGCTGTA	TEDH-1034637	HELQ	ATAGCTTCATGCTTTGTCAG	GCAAAACAGTTATACAGTGC
TCGGGATGGCGTGAGCCGACGGGGG	TEDH-1034634	HELQ	GATTGTGTCTTTCTAGAAGG	GGAGTTGCCTATCACCACAG
ATGGTACGTATAGGTTTCTCTTGAT	TEDH-1034633	HELQ	TGCGCTTTAAAACAGGACAC	GTGGCTTAACAAGTGATGAA
CAGCCGCACTTGGCTGGTACCCGGC	TEDH-1034702	HERC2	GAGACTCGATGACACGAGGG	GAGAACCATAATAAAGATGG
TTCCAGTGCTACGGGCTTGTGAATA	TEDH-1034700	HERC2	CGTGTCATCGAGTCTCTGAG	TGTGCAGCACACACAGTGCA
GGGTCTTATTTTAAGATATGCACCG	TEDH-1034701	HERC2	GCACTGTGTGTGCTGCACAG	TGGAAAACTGACTTCCACAG
CTTGCAAAGGGACCTGGTCTGTGCC	TEDH-1034735	HES1	GCACAGACCCAAGTGTGCTG	CCACTCGTGCCCATCCCCGG
TGTGTGTTCGAGGCTGGATTTCCTA	TEDH-1034734	HES1	GGTATTAACGCCCTCGCACG	AGCACCTCCGGAACCTGCAG
CTAGGATCGATTGAGCCAACAGGCG	TEDH-1034737	HES1	CGAAGGCCCCGTTGGGAATG	TGCACTCGCTGAAGCCGGCT
GGGCCTGGTGGAGAGCTGCGGACTG	TEDH-1034823	HFM1	ACTTTGAGTTCAAGTACCAG	TACAAGATATAGTGATACGA
TCCGTATTACTGCGACGACTAGCCG	TEDH-1034826	HFM1	TGTAAAAGTAAACATACATG	TACTACTGCAGGGAAATCCA
TTTCTGCTATCGAGTCTTATAGCTT	TEDH-1034979	HINFP	AATGGGACTTGATAGAGCAG	TTTCGGGGAACTTTCCCAGG
TTTGTATACTGCAAGACCGGTCCGT	TEDH-1034978	HINFP	GGTGCTCTCGAAGTTTACTG	CCAAGAGATTTGCCACAGAG
GAAGCACTGTCATTACTTTACATGA	TEDH-1034980	HINFP	TGAGAGACATACCGAAAACG	GGTAGCAGTGGAAGTAGACA
TCCGAATGCTGTGGTTAGTGTGTGT	TEDH-1035010	HIPK1	TGTCACATGGTTAGTCAGCA	TAGTGATGACACTCACAGGA
ATGGGTGGGTAGGAGACTGTGAGGT	TEDH-1035008	HIPK1	GGGTATCGAGCTCAACGCGG	TAGCTGCTGTCCACTCCCCA
TACAGTTAGAGGCGAGTAAATGCTC	TEDH-1035006	HIPK1	TGGGCAACACCAACATTCAG	GCAATGATTCCAGAGGCCAT
TACGTTTATTTGATTCCGTCCGTAT	TEDH-1035015	HIPK2	TCCCGACACTCCCAGCCCCA	ACTTACCTGGTTGTGGACAG
GATAAGCTTACAGGTTGTTGATAAT	TEDH-1035011	HIPK2	TAAACCAAGGATGATCTCAG	AATCTTACCTTGGAAGCCGG
ACCCTGCGGCGAGCCTTCATTTACG	TEDH-1035013	HIPK2	AACCCCTTTCATCACGCACG	GACACCTACTGTGTGCTGTG
CAGTTGAACATGTCAGGAGTTGGCC	TEDH-1035012	HIPK2	CCTCACAAAATGGTAAACCA	ATATCCTTTGTGGAGACTGA
TTATGATGGGGCATAGCTATATTCG	TEDH-1035014	HIPK2	ACATGACGACAGATTTGGAA	TGGCTGCTGCCGCATCACGT
CCGGCCAACTCAATATTTTTAGCTT	TEDH-1035432	HLTF	TCTGAGCTCAGGTTCAGATG	TAGTTAGAAAGTCATCTGGA
GTGGGGTTGCCGAGATGGTCACTAT	TEDH-1035429	HLTF	AAGGCAGAGCCACTATTGGA	TTAGGATTCAATTTGGAAAG
CTCGATGACTAAACGAGAACACGAC	TEDH-1035428	HLTF	CCATGAAATGGAACCAGCTG	GAATTGCCGCAGAAAATGAA
ATTCCTCAGGTCCTTTGACTGAGGG	TEDH-1035482	HMGA1	CTCACCGGAGGCTGCTTGCG	CTTCCCTTTGGTCGGCCCCG
GATGGGATTTTTGGGGGGGGGGAAC	TEDH-1035479	HMGA1	CATCTCGCAGGAGTCCTCGG	AACTCCAGGAAGGAAACCAA
GAACTTAAGGTCGGAACCCAAGCCG	TEDH-1035480	HMGA1	CCAACACCTAAGAGACCTCG	ACTCCAGGAAGGAAACCAAG
CTAGGTGTGTGCCTAGCGCAGTATT	TEDH-1035481	HMGA1	GGCACTGAGAAGCGGGGCCG	AGACCTCGGGGCCGACCAAA
AGGGGGGGCCGATCGTTGGGGTTCC	TEDH-1035486	HMGA2	CAGGATGAGCGCACGCGGTG	GCCCCAGCGCCTCAGAAGAG
AAGTTACATTAAGGTATATTTACTA	TEDH-1035484	HMGA2	GCGCACGCGGTGAGGGCGCG	ACTACTCAGGAGCCTGAGGC
TTGTCCTGGTGATAGCCAAAGGGCT	TEDH-1035483	HMGA2	TGTCCCTGGGCTGAAGTGGA	GCCCTCTCCTAAGAGACCCA
AGGAAGTGCGCTGGGCCAAGCTTGT	TEDH-1035491	HMGB1	GGTGATGTTGCGAAGAAACT	ATTTGAAGATATGGCAAAAG
GAGGCCGAGATCGGTAGTCGCTAGG	TEDH-1035490	HMGB1	TCCTTTCTCTTTAGCAGACA	GGAGATCCTAAGAAGCCGAG
TTTAAAGTGTCGAGTTTATGGAATA	TEDH-1035493	HMGB2	TGACAAAGCTCGCTATGACA	GGACTCTTCCGTCAATTTCG
GCGTGTCCCTCTATAGCTAGCTGAT	TEDH-1035497	HMGB2	AAGATCAAAAGTGAACACCC	AGAGCACAAGAAGAAACACC
GCACAGACAGCTATTTTGCGCTCTT	TEDH-1035496	HMGB2	CTGCACGAAGAAGGCGTACG	TATCCCCAATGGATAGGCCA
CCGCACCTCATGCACAAATATTTTA	TEDH-1035535	HMGN1	GTGCAAACAAAAGGGAAAAG	TTTCTTTCTCCAAGCCCAAG
GTATGTCTCAGCGGGAGAGCCCTTT	TEDH-1035537	HMGN1	TCAGAAACCTCCTGCAAAAG	AAGGGGAGCAAAGGGAAAAC
TCTGGTATTATCTGTCCTCAGGGGG	TEDH-1035536	HMGN1	AAAGGGAAAAGGGGAGCAAA	AGACTTACCTGCGGAAAACG
GGCTGTATGGTTTAGCGAGTGACCT	TEDH-1035738	HNRNPK	ATGATGTTTGATGACCGTCG	TTATTGGCAAAGGTGGTCAG
CACTTTTTATTCGCGCTAGGGAGGG	TEDH-1035735	HNRNPK	TCTTAATACTTACGTCTGTA	ATCAGATTATTCCTATGCAG
ACGGCAGATCTACGGAATGAGCCTA	TEDH-1035739	HNRNPK	GGCTCATATGGTGATCTTGG	GGGGCAGTGATTGGAAAAGG
ACGCATCCGATCCTACTGGCTTTTG	TEDH-1035769	HNRNPUL1	TTCCAGCGCTATGAAAACCG	CCTCTTTCCTCAGATCAATG
CGAAGGGTTCGGGGTGGGGGGCGTC	TEDH-1035767	HNRNPUL1	GGTGGAGGAGGCAACTACCG	CCAGCCGATACGGACCACGT
AGTGGCCCGGAGTCAGAGGGTACGC	TEDH-1035765	HNRNPUL1	GCTGGATGAAGGTAAACCCC	CCTGGTGAAGAATTGCGCAG
ACCAAGGGGGGATAGGATGACCCTT	TEDH-1035770	HNRNPUL2	CAGAATCTCCCAATGAAAGA	CACTTGAAAATGCAGATCCG
CTCAAGGGTCACGTTTGATATTCCA	TEDH-1035772	HNRNPUL2	ATAATGCTGGAGATGAAAGG	GACGAACCCGAGGAGCGGAG
TTTAGTAATTGGCTCAGTTGTGGGT	TEDH-1035774	HNRNPUL2	GATTTGTCCGCTTCTCGGAG	CTGCAGCTCCGACCGCAGCT
AGGGTACATTATTAACCTCTACTCG	TEDH-1036083	HPRT1	CAAAGATGGTCAAGGTCGCA	GTAGCCCTCTGTGTGCTCAA
GACGTTCTTGGGCTTCGATCCTTAG	TEDH-1036082	HPRT1	AATGCAGACTTTGCTTTCCT	GGGGACATAAAAGTAATTGG
GGCTCCGGCGTATTTGGGTGTCGGC	TEDH-1036084	HPRT1	ACAGGGGACATAAAAGTAAT	GGCTTATATCCAACACTTCG
ATACACGTTCAGACTTGAGACATTT	TEDH-1036085	HPRT1	TAGGTATGCAAAATAAATCA	CTGTCCATAATTAGTCCATG
CCTCGGTTACCTGGGGTTTGGCGGC	TEDH-1036086	HPRT1	CAGATTAGTGATGATGAACC	CTTCTAGAATGTCTTGATTG
AGTGGGGATTTTTAGGGGCGCGGGA	TEDH-1036684	HUS1	CAGGGTGCTAGGACAGCGCA	TCTCCTACTCACCAGCTCCA
GCGTAGGCTCAGTTATCGGACGGGT	TEDH-1036683	HUS1	ACAACAAGTAAATCCCACAA	GCGCAGGGATGAAATACTGA
GTCATAGTCATTTCTACTTGGAACT	TEDH-1036680	HUS1	CGCAGGGATGAAATACTGAA	CTTCAACGAATTTCAAATGG
CATTTTGTCGCGATATCAACACGTG	TEDH-1036689	HUS1B	CGAGCATCCGCCTGCCGCGC	ACCACAGCCTGGCCTCGTGG
TGCGGTTCCCATGGGTAACTTTGCC	TEDH-1036685	HUS1B	CGTGCACCACGCTGCGAGCG	ACGTCAGCGGCACCGTCGCG
AACCACTTAACTCCCCATTCGACGA	TEDH-1036688	HUS1B	GGGCCGAAGCACAGGCTGTC	CCTGGGCCGCGCTCGCAGCG
GTGGGACGTTCCTCGCTGCAGAGAG	TEDH-1036686	HUS1B	CGGCAGGCGGATGCTCGCGT	GACCTTCGCTAGCCTCGCGA
ACGCATGTTTTGTCGTTATGTTTAG	TEDH-1036692	HUWE1	AGTTGATCTCCCGAGAGCCG	ATCGATTCTTCATTTCTTCG
TTTGCCTGTTGTGCTATATTAATGT	TEDH-1036690	HUWE1	CATTAAGGATGTAATCCATG	GCTTGGGTGGTTGAATCAAG
TTTCGGGTGAGTCTTCAAGTTTCAG	TEDH-1036693	HUWE1	ACAACTCCTCCCATGATTGG	AGACCCAAAATGGTAACCAA
CTACGGCCCTTCTGGTGTGTGGCAG	TEDH-1036691	HUWE1	CCCAGATGCGGAAGTCTCAG	GAGAATAGCAGAGAGTGCGG
CGGGGTCATGCATTGTGCGTGGTTT	TEDH-1036694	HUWE1	GGCGAGTATACTGGACCCCA	CCAGGAAGTTGCTTGCCGGA
AGAGTGGTTGGGGGAGTAAAGTAGG	TEDH-1036870	ID3	AAGGCGCTGAGCCCGGTGCG	GGGTACCAGTTCCCGCAGGC
TAGAGAGGGCGGTTGGGCAGGAGCG	TEDH-1036868	ID3	CGCGCTGTAGGATTTCCACC	ATGTCGTCCAGCAAGCTCAG
GTATAGTGGATCCCTCCCGCCGGAG	TEDH-1037406	IGHMBP2	GATCCCTGGACCCAGCCAAG	CATCGCCGTGGACAATCTGG
GTAGTTTTGTGGTTCTGACAATTTT	TEDH-1037407	IGHMBP2	GCTGAGGCACGACAGTTCCG	CACCCAGAAGTCGGTCACGG
GTTCTTTAGAACTTATAGTTAAAAG	TEDH-1038118	ING4	GGACCTAGACCAAAGAACAG	GGCACTACTCATATACTCAG
ACCAATCTATCTTTAATCGTGCTGT	TEDH-1038115	ING4	TCGGCGGCTGGACACAGACC	ACAGGGCCATACCATCTCAT
CGTCGGGGGGTGCGGGCATATTATA	TEDH-1038116	ING4	GGCAAAATGGAACCACTCAA	TTCCGTTCTTGGGAGCAGCG
TACCGAGCATAGTTCCGGACACGTG	TEDH-1038163	INO80	CAGAATCAAAATGTGATAAG	GCTTGCTCACCAGTGCATGA
AGAATGTAATTCATGATTCATCGAT	TEDH-1038159	INO80	TTAAACACATATTCTCTGAA	GGTAATAACCACATGGAAGG
GTTATCCGATTTCGGGCTCTTGCGT	TEDH-1038161	INO80	GATAGCTGGTAATAACCACA	TGCTCACCAGTGCATGAAGG
TCCCCAAGGGTCGGGAGAGTGGCGT	TEDH-1038160	INO80	AGATGACTCCTTCATTAGCG	GAGCAGGCAGCGACGCAGCG
ATAGGAAATGTGTCCTTTGATTTAA	TEDH-1038168	INO80B	CTGTGCGGGAGCAAGCGTAG	GGGCCTTACGTAGCCAAAAG
AATACTTGGACAATCGCGAGTGCGT	TEDH-1038165	INO80B	GACGCCAGGTGGGAAGGAAA	TCATTATCCACAACCATAAG
CAAGAGCAAGTCTGATATTCGCTAA	TEDH-1038167	INO80B	GGACGCCAGGTGGGAAGGAA	TACCTTCACTGTGATCCCAG
ACAAGACGGGCCCAGGATGTACCTT	TEDH-1038170	INO80C	GCAATGCCCTTTCAGAAGCG	AGGTCCTGTGCTAAACTCAG
TTCGCTCGAGGCTTTAATTTTCGTA	TEDH-1038169	INO80C	TTAGGATCGTTCAGTTGCCA	CTGAACCGCAGTTTGCTCTG
GACCGTGCAGAATGATCAGGAGGCT	TEDH-1038172	INO80C	GGCTCAGGGAACGATGCTCG	TTAGCTGGCTTAAAGGATGG
CTATTATGCCAGGTTCGATATGAAT	TEDH-1038173	INO80C	TGAACCGCAGTTTGCTCTGG	ATTTAAGGATCCCAACTTTG
TGAGTTGTATTTTAGCGACTTGCTT	TEDH-1038176	INO80D	AATACAATCCTTGAGCCGAG	TTGGGGCTATATGAGCACAA
AGGTCAGCGGGGGACAGAACCGGAG	TEDH-1038178	INO80D	CACTCACACTCCTCACCCCA	TTGGCATGTTCTTCACACAG
TCTTGTTGCGCAGCGGATAGAAGAG	TEDH-1038177	INO80D	ATATTCACATTGCTTGAAGG	ACAATGTCTGGTGAATGGAA
CTCCCGTTGTTCAAGGCATATTGAC	TEDH-1038175	INO80D	TGACTTGGAATTGAACCAGG	GATTGCCCCAGTGAGTTCTG
GCCAAGTGTATGATGTGTGCCGCCC	TEDH-1038174	INO80D	GCATGCAGTGGAACCGTGAA	CCAGAGTACGATGTTGTGTG
CCAAACAATACGGGCCTCGTTACAG	TEDH-1038179	INO80E	ACTTCTGCAGTACGAGAACG	ATCTTCTTCTCACCTCTTAG
ATGTGTTCCTATGAAGATAGCACAA	TEDH-1038182	INO80E	AGTGCTTCCAGGAGGAGCTG	GGACCGTGCTCAGGATCGTG
ACGTGGAGAAGGCAGGGTTTTTGCG	TEDH-1038180	INO80E	GCATCGCTGAACATCTGCCG	ACCGAGCTCAGGTATGGGGA
TTGTATTGTGTTGGCACATATGGGG	TEDH-1038183	INO80E	CGTGCCTCACCTCTTGTCCC	ACTGCAGAAGTCGGTCTAGG
CTGGTTCTCTGACCCCGGAGATCCA	TEDH-1038181	INO80E	TCTCCCTGCCTCCTTCAACA	AGCGCAAAGGAAATTACTGA
ACCGTGCTAGTGTGTCAGATTCCTT	TEDH-1038376	IP6K3	CTATGGAAGAAAACTCTCAG	TCTGGCTCCTAATGACAGAG
TTCGGTTATGTATGAGGAAACTCTT	TEDH-1038379	IP6K3	GGTCTCCACAGAGTCGGCGG	ATTATGTAGGAACTGATAGA
ACTCAGTTCTGATGCTGTATTAGTT	TEDH-1038378	IP6K3	ATTCCAGTAGCCCTTGTATG	AGAGGAAGAGCTTCAACCCG
GATAGTTCTTGTGACTTTATAATGC	TEDH-1039398	KAT2A	TGAGGACGTGGCTACCTACA	GATGGGCCTACTTGTCAATG
GATGCCAAGACTAGTCCCATAAATG	TEDH-1039395	KAT2A	AATCTCCGTGAAGCCCTGGG	GATGACCTCGTAGTAGTCAG
CTTTTGTGATAGGGTGTCACGAGTT	TEDH-1039394	KAT2A	GGGCTACATCAAGGACTACG	CGTGACCCGGAAGCTCTTTG
AAAGATATTCGGTAGTTGTGAACCT	TEDH-1039401	KAT2B	TCCGATGGAATTAATCAACG	GCAAGGTTGGAAGAGCGCAG
CACCGGGATAGTATTTCTGGGAGTT	TEDH-1039402	KAT2B	TGAAGTTATAAGGTTCCCCA	GGGTGTAATTGAATTTCACG
GCGTAATTGTATGTAATTTCTGATT	TEDH-1039399	KAT2B	CGCAACTACGCTCCGCTCCG	TGGGATGTGAGCTAAATCCA
TAGCCGCCATAATGCAAGGCGGGGC	TEDH-1039404	KAT5	CAATCTCATCAACTACTACA	CACACTGTCAGAGGACATCG
ATCAGTCCCATACCATTTGCTTTCT	TEDH-1039405	KAT5	CATCGTGGATGGCCATGAGC	ACTTGAGGCAGAACTCGCAC
GTACAGAGTAAATTTGGCACAGTTT	TEDH-1039406	KAT5	GGGAGTGAAGTGCAGACACT	ATAGGAGGCCAAGGTCTGAG
TTTCGTTCGTATATGTATAGGTGGA	TEDH-1039427	KAT8	GAGATCCTGCGGGACTTCCG	GTCTCGAGTGAACGACCAGG
CATGATCTCGTGTTCCACTCTGGCA	TEDH-1039426	KAT8	GGGAGAATGCGGCCGCTGAG	GGTGCTGCTAGAGATCCTGC
TTTGACCTCACTTACCAAGGTCGTG	TEDH-1039425	KAT8	CAGGATCTCTAGCAGCACCC	AATATGGTCAAGTACTGGAA
TCCATGGCCCGAGGCTTTGTCATGC	TEDH-1039424	KAT8	GTCCCCGGATGGAAACAATG	CAATATGGTCAAGTACTGGA
TTTCCAGGGCTCCGGGTTCTTTTCA	TEDH-1040135	KDM1A	TCTTAGTGAAAAGCAAACAC	AATAATACTCATCTTCTGAG
GCACCCTGAAGGATTAGCAGGGAAA	TEDH-1040133	KDM1A	AGTGCGACAGGTTCGCTACA	GATGTTATCTGGGAAGAAGG
GTGTCGTTAGCACAGTGAAGTGGTG	TEDH-1040136	KDM1A	CGACAGGCCCGCGGGCTGCG	TGAGGCCCTGCGGACCCCGG
GTAAGATCGAGAGTTATATCATTTG	TEDH-1040146	KDM2A	GACCGAGTCACCATACCCCG	ATTGTGCCCCAGGCCCTCAG
TTCATAGGTAGCTTAAAGAAGGGTG	TEDH-1040142	KDM2A	AGGCCCACCAAAGAGCTCCA	AGGTCGAGTCGAGACAGGAG
GTGTATCATTTCATGACCTGGCCTA	TEDH-1040143	KDM2A	GAAAAGGAGAACAATCCCAG	ACTGAGGGCCTGGGGCACAA
CAAGGTCGCAGGATAGGACTAGTGG	TEDH-1040144	KDM2A	GCGATGAGCGCTTCAAACGG	GTTGAGAAAGCCAAGATCCG
AGCTTCTTTTTGTATTGTGCCTGGG	TEDH-1040162	KDM4A	GCCCTTACCAGTTTGAAGCG	ACTCCGCACAGTTAAAACCA
AAGTCTTATTCTATCAGTGTGTGCG	TEDH-1040166	KDM4A	GCTATGGGTGGGCCTCACAG	CAGCGACAATCTTTATCCTG
CTTAAAGAAATTCTGTCTAGAGCGG	TEDH-1040165	KDM4A	ACATCTGCACCATAGATTGG	TCTTCAAACTCACTATAGCG
GTGAATCACAATCGTTGAAAGATTC	TEDH-1040177	KDM4D	CACGTTTGCTTGGCATACAG	CCTCTGCGCAGTTGAAACCA
ACCAGTTATGCTTGGGTCGTTATTG	TEDH-1040181	KDM4D	AGGTTGCAGGATGCGCACGA	ATAATCAATCCATCGCGGAG
TCAGCGCATGTTCTGAGCTCGGTCA	TEDH-1040179	KDM4D	CCACTAACTGCAGATCGGCG	TGCATGTTGTGCCCGCCAAG
AAAATGCGTTAGAACGTGGAGTGTC	TEDH-1040191	KDM5A	GGATCTGTATGCTTTGAGCA	TCTTGAAGCACTGCCGCAAG
GCAATGGTTTTTGATAATGGGTGGC	TEDH-1040189	KDM5A	ATGCGGCCGATAAAGCTGAG	CATGTTCCTGTAATCCTGAG
CGTGTAATTTCAGAGGGAAGTATGG	TEDH-1040188	KDM5A	ATCTACTCTGAAGATCCCTG	TTACACCATATAGCAGAGAA
CAGGGTTGGCAGTGGTATTCTGCTT	TEDH-1040240	KEAP1	TCAGGACCAGCTGAACAGCG	CACCTGCGTGGGCTTGTGCA
ACGGGACGATAAGTGGGGTCTTGTT	TEDH-1040238	KEAP1	CTACCTGGTCAAGATCTTCG	GCAGCCGTGGGAGCCGCCGA
TAAGGGGCGCGGGGGGTGTCTACAG	TEDH-1040239	KEAP1	GGGCCGCCTGATCTACACCG	GCAGTCCGACTCCCGCTGCA
GTATCCAGGGCGTGGGGGGTGGGGA	TEDH-1040237	KEAP1	CGCTGAGCAGATTGGCTGTG	CTACACGGCCTCCATCTCCA
AGCGGTTTGTAACAGGCATTGCTAC	TEDH-1040241	KEAP1	GAGCGGCCTGGCCGGCTGCG	ACAACTGTATCTATGCTGCT
AGGGGGCGGACTTGGTGGGGTTGGA	TEDH-1040589	KIAA1586	AGAAGGTAAATTAGGATGTA	TCGAGTAATGGGACCAAGAT
CTGGAAAGAGAAAGATGCCCCCTTG	TEDH-1040588	KIAA1586	TCAATAGTGCTGAAGCTGAA	AAAGCCACAAATAACATAAC
TTTACGCTAGCTAAAGTGTTATCAT	TEDH-1040590	KIAA1586	CAATCCATTCCTTGGACACA	TCTTCATAAGGCCATGTGGA
GTCTACTACGTTGCGCCGTAGAACA	TEDH-1041155	KLHL15	CCGCAAACTACAGTATTTCG	CCAGCTTGCAGGGCATCCGA
TGTCAGCTGGGTATTCGTAAGTGTT	TEDH-1041156	KLHL15	GCCACTTCTACCAATCGGCA	TTAACAAATATGGACATGAG
TGGGTATGGGAGTGGCAGGAAGGGT	TEDH-1041157	KLHL15	AAACAAATAATGGTTCTTGG	ACAACCCAGAGACTGATCAG
CACCGCTGCGTGGTGGGTAGCACTT	TEDH-1041461	KMT2A	CTAACTGGCTTAATCCTTCG	TTCTGTTCCTATAACACCCA
ACTAGTTTTTATATAAGTGCCGCTA	TEDH-1041463	KMT2A	TCCTCGGTAGATCTTACGCA	GAGAGCCTGGGGTAAACCAA
ATCTCGCAATAGACATCATTAGTAA	TEDH-1041460	KMT2A	GCTGAGTTCCAAGAGCTCAG	TGACCTACCATCATTCCCCA
GAAGTACATCGCAGGTTTCGCTAGA	TEDH-1041462	KMT2A	GCAAAGGGTGGGATGCACAG	TTGACCATAATTATGCTCAG
CGTCTTATAATTACGTGACTAGGTG	TEDH-1042390	L3MBTL1	CGCCAAGTGGACCATCGATG	CACACTGGCCACGCAGACAA
TTCAAGCAGAACCAGGCTTTATGGG	TEDH-1042388	L3MBTL1	AATGAGTGGGTAGAGAGCAG	GAACCCGTCCCTTGTCTGCG
TCTACAGCATAGTACTAATTAAGTG	TEDH-1042387	L3MBTL1	ACCTCTCAGGCTTCTCCCCA	CACAAGCTGCAGCCTCCCAA
CCGTTTAGGATTCATTTTATACCTT	TEDH-1042391	L3MBTL1	GATTCGCGTGGCCAGCGTGG	GAGGGGCCTAGGTTACAAGG
AAAACGTTTTGGCTTTCGGGACTGA	TEDH-1042675	LATS1	CCCCTGTTTGTAAAGCAGAA	GGTGGAGTTGTACCTCTTGG
CGTAGATTTCAAGAACTACTAACCG	TEDH-1042674	LATS1	ACTCGTATGGAGGAACAGAT	ACTCCTCCACCACCTCCAAG
CGTTCGCTGTGGTATGCATCCGCGG	TEDH-1042672	LATS1	CCCTTCTGCTTTACAAACAG	ATTAATGCCAGCATGAAACC
ATTGCCAAAAAGATACTACGTGTTT	TEDH-1042671	LATS1	ACAAGAAAGATGAAGAGCGA	GGATCAGCCAAGCTTGCCCA
GTTCCACACTCGTCAATGTGTACCT	TEDH-1042673	LATS1	AATCAGTAAGCCTAGCAAAG	GAGTTTGGTTCCCATGAAGG
GACAGTTTTGGGAAGCTACGTTTTC	TEDH-1042679	LATS2	AGTTAGACACATCATCCCAG	TCCAAAGGCACCGATCCCCA
GAGAGAGTGCGGTATTAGGGCGGGC	TEDH-1042676	LATS2	TCCCACCATCAGCCACCCCA	CATCTTGCTGATGTACTCCA
CTGGTGCGATTGAACTCACCTACAC	TEDH-1042680	LATS2	GCTATTTCCAGAATAAGTCG	CGAAATTCGAGGTGTCCATG
CGTGAGGGGCAGTGGTGTGGATGAG	TEDH-1043339	LIG1	AGCGTCTTGGGAGCTCTGCG	CCGCAGGTGGATAGTGACAA
ACGGTATGTCACAATCTTGCACAAA	TEDH-1043338	LIG1	GTCTCCCTCAGACTCCTGCG	AAGACCCCGGAGGCAGTGAG
TACGCGCTCCTGGTTCAGCTACAAG	TEDH-1043337	LIG1	TCTCTCCCCAGGTCCCTGAG	TCACGGACTCGAATAAACCG
TATGCGGTGGATGTATACTCTCACC	TEDH-1043344	LIG3	CGTATGCCGAATTGGCAAAG	TCTCGGATTCGGGTGCAGCG
TCTTCTGCGTATAGGCAGGGGCGAT	TEDH-1043341	LIG3	GCAACCCAGATGATATGGCA	AACTTCCGCCGCTCACACAG
CAAATTCTTTTCTAAGGAGGTTCTT	TEDH-1043342	LIG3	GATAACCCGGGTGATCCAGG	GCGGCTGTCCAAGCTCACCA
GCCTTCGAGAGGGGTGGTGTTATGG	TEDH-1043347	LIG4	GAGAGAGTATGAAACACAGA	TATTGGGGTAAAGGATCACG
TCAGGAGGTACCGAGTGAGGCCATA	TEDH-1043345	LIG4	ATTAAACCAGAGTATGTCAG	TGGCGTCGAAACATACTGAG
TCAGGCTTTCGGTGCAATTTGCATA	TEDH-1043349	LIG4	TTCAATTCGTGGAAAACGCA	CCACATAAAATGCTGCTTGG
AAGACTAGTTAAAACTAATGTATTG	TEDH-1043698	LMNA	GGCGAGCTGCATGATCTGCG	CCTTCCACACCAGGTCGGTA
GGAGTATCCAGAATCTAGATGAATG	TEDH-1043695	LMNA	CAGGCTGCAGACCATGAAGG	CCACCAGTCGGGTCTCATGA
AAAGGATAACACGAAATTGATGAGT	TEDH-1043696	LMNA	CGCACGCACTAGCGGGCGCG	CAGTGAGAAGCGCACGCTGG
CAAACTGGGTCCAAGCACAAAGGTG	TEDH-1043699	LMNA	TCATCCCAGACACAGGGTGG	ACTGAGAGCAGTGCTCAGTG
GCCGAATAACAATGGTTGCACAGTG	TEDH-1043697	LMNA	GCATGATCTGCGGGGCCAGG	GGGATGAGTGAGAGGAAGCA
GTTCAGGTCAATGGAACCTCTCGCT	LUC_1	Luciferase control	CGAGGTGAACATCACGTACG	TCGTATTCATTAAAACCGGG
GCGGATGTTGGCGCGGCGTTCATTT	TEDH-1045521	MAD2L2	CTGATTCAGCTCCGGGTGGC	GGATAAAGAGCACCGCCCAG
ATTAGTGCTTCGGGAATCGCGGCGC	TEDH-1045519	MAD2L2	TGTGCAGATGTCCTGCCACC	GGATTTCCCCTGGATCCTGG
TCACCGCGGGGATGTAGGTTGCTGG	TEDH-1045518	MAD2L2	TGCTCATCCGCCAGGATCCA	GAATGATGTGGAGAAAGTGG
GGGGTTATGGTAGTAGAAGATGTCG	TEDH-1045517	MAD2L2	ACGCAAGAAGTACAACGTGC	CTGCTCATCCGCCAGGATCC
TTTGGGCGGTGTTCTACTATAGGGG	TEDH-1046203	MAPK14	CGATCCTGATGATGAACCAG	TCTGGTGACCCATCTCATGG
GATGTCCCGGCCGTGGAATGTCAGA	TEDH-1046202	MAPK14	TGTTCTTCCAGTCAACAGCT	GAGCAAAGTAGGCATGTGCA
AGGTGTCTCTCGCGTGTGGGTTTGT	TEDH-1046205	MAPK14	GTATCTGGTGACCCATCTCA	CTTATCTACCAAATTCTCCG
GGTAGTTCGATACACTCGCGGATTA	TEDH-1046204	MAPK14	GGTAGATAAGGAACTGAACA	TGATGAAATGACAGGCTACG
GGGGTCCAGGAGTAATGCTAACGTC	TEDH-1046237	MAPK8	CCAAGAATGGAGTTATACGG	CTTCTCTATCAGATGCTGTG
TCACGGATAGTCCAGGAATCGCATT	TEDH-1046241	MAPK8	ACTTTGAAGATTCTTGACTT	AGAATCAGACTCATGCCAAG
TGATTTCCACTAAACAGGGATTCCG	TEDH-1046239	MAPK8	AGACATTGATGTACGGGTGT	TAAGGAAGTTATGGACTTGG
GCCCGGACTACGATATGTTACGGTT	TEDH-1046271	MAPKAPK2	GCCGAGCTTACCATGATCCA	GATGCTTCAGGACTGCCCCA
GACAGGCGAAGGCCTCTAGGTCTCG	TEDH-1046269	MAPKAPK2	TCCACGATCCGTACGATGTG	AATCATGAAGAGCATCGGTG
GAACCGAGATTCCGGCTTGTTCGGG	TEDH-1046267	MAPKAPK2	CTGGCACCTTGACATCCCGA	AGAATGGTCAGAAGTATCAG
GAGACTACCTTAGCGGCCCTGAGAA	TEDH-1046268	MAPKAPK2	GGTGATGGTCATTCTCTGGG	GATTGAATGCAGATACTGGA
ACCTTAGAGCGTTATGCTTGGTCTC	TEDH-1046396	MARK3	AGGACAGGTGGATCAATGCA	GCCAGTCGTAGCACTTTCCA
CAGTCGCATGTGCTACCATGGAGTC	TEDH-1046395	MARK3	GCAGCACCTGAGCTCTTCCA	TATTGGCGTCCAACACTTTG
TTTTTTGTTCGAGTGCGAGTGAGAA	TEDH-1046393	MARK3	ACTGTTGAAAACAATCGGCA	ATAACTGCGACTATGAGCAG
CGGCGTGTTCATATAAGTCGCGGGA	TEDH-1046464	MASTL	CTAGTAACAGCTCAGGTGCA	CCCCAGATACACTTTCCCGA
CTGTGAAGGACGACAGGTGTTCACG	TEDH-1046463	MASTL	ACTCCGAAGAGTGTGAGAAG	GGAAGCAAGAAGGAGCCTGG
GTTACATCTGAAGTTCGGTGGGTTG	TEDH-1046462	MASTL	ACACTTTCCCGAAGGCGCCC	ATTCCTGGCTTCAAAATAGG
AGCCGGATCGCAGTTAGTGCCGTTG	TEDH-1046465	MASTL	GTGTATCTGGGGCAGAAAGG	ACTGTGAAAAGAATAGTAAG
GGGCAGGGTGTGGGGGTAGCGGTGG	TEDH-1046516	MAU2	TGGTCGTCAGCACTGCTGAG	GCATGGTTGGAGAAGAGCCG
AGCTAGCGGTCTTGACTCGACAACG	TEDH-1046515	MAU2	GATCTCATCATCGTGCAGTG	TGTCAACTGCATGGACAACG
GTGTCCGAAAGCTGGTAGAATCTTA	TEDH-1046513	MAU2	GGGCCGGCACCTTACCCGCA	AGATGTGGCCCAGAAGCACG
GGCTGATTGGGCTGCATATTCTTCT	TEDH-1046539	MB21D1	GAGCTACTATGAGCACGTGA	CAAAACCGCCCGGAGCTTCG
GGAGCGTATGTCGATTTACGCCTCA	TEDH-1046537	MB21D1	CAGCCGCGATGATATCTCCA	GGCCTCGGAAGCTCTCTGCA
GCTGGTCCCGTGTAAAGTGAATCTT	TEDH-1046540	MB21D1	CGTGTCCTGGGCGCGCTGAG	TAATAAGAAGTGTTACAGCA
GCAGCCTCAGGAAGTAGGTAGGGGT	TEDH-1046588	MBD4	TGCAACTCTGAACTACTACT	TGATGATGTTAACTTCAGAA
TGTTTAGTTTCGTACTGGATGACAT	TEDH-1046589	MBD4	AGAAAGGTTAGAAAGCCCAA	CGAAGATCGTAGAGACCAAG
CATGATAGGTTGGTGGATAGGTCTG	TEDH-1046587	MBD4	TTCTTTCAAAAGCAAATGAG	ACAACTCTTTCCCATCCACA
CAGGTTGAGGTCCCCACGCTTTGTG	TEDH-1046591	MBD4	GTAGCGATGAGAAGCTTCCA	ATGAATACCTGACAAAGCAG
TTGCGACCTGTCACATCCGAAAAAG	TEDH-1046590	MBD4	AATACCTGAGAACTTGACAA	TTTACTGTACTTTCTAAAAG
GAGTGCTAGGGCGCCACAGTGGCGC	TEDH-1046664	MBTD1	ATTGAACTTACTCCACCCAG	GATATTACAAAGAAACAGGA
AAGGGCAGGTTGCGTTATGGGTCTT	TEDH-1046663	MBTD1	AAACCGACAGGGAAAATAGA	GGGAAGAAGAGTATGATCAG
CCAGGGTATAGGCGGGCTTTCAAAG	TEDH-1046666	MBTD1	ACCTTAGCAAATAAATGTGG	TTAGCTACCTGTGAGATGTG
AAATTCCGAGCGTGCATGCGGATGA	TEDH-1046662	MBTD1	GACACCACCCTACAGGATAG	CTTACCTTAGCAAATAAATG
CGTTGCGGGTGACGGGAGAACCATG	TEDH-1046779	MCM10	GAGAAGGCTTCCACACAGAT	ACTCTCCTCTCCTTAAGAGG
CAGCCTAAAGCAACGAGTGTATTCT	TEDH-1046777	MCM10	TGTAAAGCCAAGAAGAAGAA	TCTTGGTTCTTGGTAGCGCA
TAAGAAGCGGTCAGACAAACAGCTT	TEDH-1046778	MCM10	ACTTGATCATCCAGGAAACA	AAGACTGGTCCAAAGATAGG
GTGTACTCACTCATTACAGTTAGGC	TEDH-1046786	MCM2	GTGTGTGGTGAGGGACACCG	GGGACTGGCAGAAAGGACCC
CCGATGGACGGCGGGTCCTGGTTGA	TEDH-1046782	MCM2	ACATCATCTACGCCAAGGAG	GCAGCTGGTCACCACCCCAC
GAAAAGAAACTAAAGAACTTTAGCT	TEDH-1046785	MCM2	GAGCCTGGTGGTGAACTATG	GGAGAGTCCAGGCAAAGTGG
CTGAGTCTCGCCCGGGTAGTCTTGT	TEDH-1046789	MCM3	ATACCGCAGAAGCTGAGACT	GCAGGAGGTAAGAGTCCGCG
GAATCAGACGTTCAGTGCTTTGTAA	TEDH-1046787	MCM3	CCTTTACCTGAAGGTCCCAG	ATATCCACAGCACTACCCAA
TTTAGTAGCGCAATGGTGTGAGAGA	TEDH-1046791	MCM3	AAATGGCAGCCACATCCGTG	GAATGACGTCCACAGAGCGG
TACAGTAGTGATCACCTCAATAGTT	TEDH-1046794	MCM3AP	CGAAGTCATACCAATCCCGC	CCATGGGATCTCCATGACCG
CAGGTAGCTAGTTTCTCTTCTACCG	TEDH-1046793	MCM3AP	GTCCGCCTGAATCGACCCCG	AATGAAAGGACTGAAAAGGA
CTGCGGGGGATAAAATGTTGCGCCA	TEDH-1046795	MCM3AP	GATACCATTAATGATCTACA	CCAAATAAAGTACCTCCCCG
GACATGGGAGTTGTGGTGGTTAAAT	TEDH-1046798	MCM4	ATGTCCACGATGCCAGTCCG	CGTGTACAACCTCGTCCCCA
GCGATGGGAACATCCTTCTTAACGC	TEDH-1046801	MCM4	CGCACAGCACCATCATGCCG	AAGGCTTCAGAGCAAGCGCA
TTCCACCCGTATAGGCGCGCTGGCA	TEDH-1046800	MCM4	CGTCCTGAGGGTCCAGCAAG	TACCTTGATAATAAAGTATG
CTTCGATTTTCGCATTAAACTTGGA	TEDH-1046803	MCM5	GTCTGAGCACAGCATCATCA	CGCTACATCATCATGCGGAG
AACCGCCGGCATTTTGTATACCGCC	TEDH-1046804	MCM5	GCGGGGCCCGTCAGCACGAG	ACCTCCTCCCCAGAAGGCCG
GGTGTTATCTGGCACTGGTAAAATA	TEDH-1046805	MCM5	CCTGATGGACTTACTCGCCG	GATCCCTGGCATCATCATCG
TGATACGGTTTCTCCAGGCAAGTAG	TEDH-1046802	MCM5	CAAGCGGCATTACAACCTGG	GGAGGCCATTGTGCGCATCG
CTCTTCTGGAAACATAAGGCTGGGC	TEDH-1046811	MCM6	GAATAAATCAATCATCCGTG	TGCAAGACAGTTTAAACCCA
GCGATTTACTCAAGACTGGAATCTC	TEDH-1046807	MCM6	GGTTTGCTCACTCGCATCAG	TATTGTGCTTCACCTCAGAA
TTTAGGCTTACTCGGGGAAAATATA	TEDH-1046808	MCM6	ACTGTTCCTGGACTTCTTGG	GGCAATGATGAAGTAAAACG
CAATCCCTGTATATATAGAGCTGAC	TEDH-1046812	MCM7	ACCCTGGTCAGCCAGCACCA	ATACGTGGAGATGAGGCGAG
GTGGTTACGTAGCTCATATACCAGC	TEDH-1046814	MCM7	ACACTGGTCACAAGTGTAAG	GAGCAGCGCTGTGTATCTCG
GTGCCGCGTATCCGTGGTGTTTAAT	TEDH-1046815	MCM7	CACACCCGCCCAGTTCCAGG	GATACAGCCGCCCTCCTGAG
GCGCGATGGACCTGGGTACTTCCAG	TEDH-1046821	MCM8	ACAAACATACACGCCACGTG	ATTGGATCACTAAATGACCA
GTAGTGGTTCGAGCTAGACCAACGG	TEDH-1046819	MCM8	CAGTCCATCGTAACTGTGAG	CCACAAACATACACGCCACG
AAATGGGAGGATTAAGTAGCGTGAT	TEDH-1046826	MCM9	TTCCTGGTAATCTCTACACC	TTACAATCCCGTAAATAGTG
AGACTCTAATATGCCGCGGTCTGCT	TEDH-1046822	MCM9	TGAGAGGCAAGTGAATTTAG	AAGTGATTTACCTGATATCC
ATCTCTCAGATAGCTTCTCGCGTGG	TEDH-1046824	MCM9	AACCAGGTGTAGAGATTACC	TCCAAGCTGGGACACGAGGA
TTTTTGAGGGGTTCCTGAGGTATAA	TEDH-1046823	MCM9	GCTCTCCAAGCTGGGACACG	AATCCCACCAGCCAGCACCA
GAGGGAGAAGGGAGTTAATCGAAGA	TEDH-1046856	MCPH1	GACAGGCTGCAGCACGTGGC	GATGATTTAACTCCTTTGGA
GATTTTTTTTTACATTATAACGGTG	TEDH-1046854	MCPH1	AGACAGGCTGCAGCACGTGG	TAGTGGCCTATGTTGAAGTG
CTTAATTGTTGTCGAATTGGGTATC	TEDH-1046853	MCPH1	TGGGACAAAGCTCAGAAGAG	AACACCTTAGGGCTTCTTCA
GGGCTTCTCTAAGGCTACTGCCGGT	TEDH-1046855	MCPH1	GTTGAAGTGTGGTCATCCAA	AACTTACCCGGAGGATACAG
GTTCGGTCCTGACTAAATCTATCGA	TEDH-1046860	MCRS1	GCATCAGGTACCGCACCATG	GATGTGGACCTGTCTCTGGA
TTGCGGCCCATCGTCCGGATGCACG	TEDH-1046861	MCRS1	GGGCCAGGTAGAAGGCATCA	GAGCAAGGCCCTGTTTAGCA
GATCCCGCAATCCGAACCTGTTCGC	TEDH-1046859	MCRS1	CTACCTGGCCCGTACCGCGA	GGCCCATCTACATCGATGGA
TTTAGGACTAGGGGACCGCCGTCGT	MDC1_1	MDC1	CCGAATGCCTGACTGCTCTG	CCTCTGTGATAGTTCCAGAG
ACTGAGATACAGGGGTGTCAGAGCG	MDC1_4	MDC1	CATATCTTTAGTGGTGCCCA	TTGTGTGTTGATGTCCACTG
TTTGAGTTGGGCAGCTCTTCTTTCA	MDC1_5	MDC1	TACAGCAGTCCAGAGCATGG	AGGGAGAAACTCAACCCCAG
TCCTCGTAGGATTGTGGACTGGCGA	MDC1_2	MDC1	GCACCTATCCTCCGAGACTG	AAGCAGATAAGAGCTCACCT
CCTAGTAAGGACCGTGATTACGAAG	MDC1_3	MDC1	AAGATATGTAGCCGCCCTAC	CCTCTCTGGAACTATCACAG
GACAAAAAGGCAATTAGCTGAGTTA	TEDH-1046927	MDM2	AGACACTTATACTATGAAAG	GCAGTAGCAGTGAATCTACA
CCGACGAGCGATTTTGCTGCATGCT	TEDH-1046928	MDM2	GTTGCAATGTGATGGAAGGG	CAAGGTTCAATGGCATTAAG
GTAACCTCGAAGTTGCCACTTGGTG	TEDH-1046930	MDM2	GGGAAATACTATCAGATTTG	TTGGTAGTAGTCAATCAGCA
GTGATTAGTCATGCTAGGGGCAGTT	TEDH-1046931	MDM2	CAACATCTGTTGCAATGTGA	TGCATTGTCCATGGCAAAAC
TTTATAGGTGCAGCTTGTTCTTCAT	TEDH-1046929	MDM2	GAATTGGTTGTCTACATACT	ATCTGTTGCAATGTGATGGA
TAAGGTAGGAGCGCCTGTAAAAGGA	TEDH-1046932	MDM4	AAGAATTCCACTGAGTTGCA	CATCCCACTCCTCAAATCCA
ACGGCTCGTGCGGCTCCTGGGAGAA	TEDH-1046935	MDM4	AAATGGTTCTTCGACAATCA	GCTAAAGATTCATACCTCAG
TGGACGCTCCGGGTGGGAGCGAAGG	TEDH-1046933	MDM4	TGTGAGAAAAGACCACGAGA	ACTTGTCTTTGTAGGATGAG
GGACCTTTGACGGGTGGAATGTAGT	TEDH-1047260	MEN1	ATCCTTTCCTAGGTACCCCA	GCTGCGCTCCATCGACGACG
CATTCCGATGGGTTTTTATTTGCGC	TEDH-1047257	MEN1	CCAGGCATGATCCTCAGACA	TCCCGGGCTTCCTCGCCCCA
TTACCGAAGTGTCGAGCATCGCTCT	TEDH-1047256	MEN1	GGTGCGCATAGTGAGCCGAG	TCTGGCTTGGACTCCCGCCG
TTTCCCCTTCCTCCACTCGACCGAA	TEDH-1047454	METTL3	ACCCTTGGAAACCAACTGGA	CAGTCCCTGCTACCTCCCCA
GCGTTCTACCATCCTTCGTTCGATG	TEDH-1047455	METTL3	AGTTCCATGTGAATATCCCA	GGTGTCAAAGGAAATCCCCA
GTAAGCTAGGTATGTAGCGTAAAAG	TEDH-1047451	METTL3	CTGTGACTATGGAACCAAGG	CCAAGCAGTGTTCCTTCCCA
AATATTGATGTTTTGGCTGGATCGG	TEDH-1047734	MGMT	TATCGAAGAGTTCCCCGTGC	TCCTCCGGAGTAGTTGCCCA
GGTTCCGGTTACGCGCACTACACTC	TEDH-1047731	MGMT	GGGATGGTGAAGAGCCGGCA	GGCCAGAAGCCATTCCTTCA
AGTATGTAACGCTTTTTTTCGGTTA	TEDH-1047735	MGMT	GCAGTGGGAGGAGCAATGAG	CGGACCTCCGAGAACCGCAG
GGTCTGCACTAAGTTGGCTTGGGTG	TEDH-1047732	MGMT	GGATGGTGAAGAGCCGGCAC	GAGGACTGGCCGTGAAGGAA
GATGGAGTGGCCCAAGGTTACCGTC	TEDH-1048080	MLH1	GGTGGAAGATGATTCCCGAA	AGATAGGCAGTCCCTCCAAA
AACATCGGTGCCCTCGGACGGCCTA	TEDH-1048081	MLH1	CTCCAGGATGTACTTCACCC	ACATAGCGCATTCTTTACTG
GGAAAGCGTGTGTACAGGTTTTTCT	TEDH-1048082	MLH1	AGCATGGCAAGGTCAAAGAG	TGCTTGATCACTGACCTCAG
GTAGCTTAAAAGGATTTGTTTGTGG	TEDH-1048085	MLH3	GAAGCCAATGAACTTCGGAG	GGAAGTCTTGACTCTCCCAG
AGCTGCGGTGCGACGCTGGTCGGTA	TEDH-1048089	MLH3	TGGAAACGTGTCTATACCAG	AACACCTTCTGGACAGTCAG
ATGGTCATTGGTCGGTTTACATCCT	TEDH-1048088	MLH3	TCTCCAAGTCCTGTACCGAG	TCTCTTTCCACAAAACATAG
GCGCCTCGGCATGGCCCGTCTGATG	TEDH-1048086	MLH3	AGCTCTTTAGAAAATCCGTG	GTCACTGTTATCTCTAGCGG
CGCACTTGCATAGATTCTGGCTATC	TEDH-1048342	MMS19	GGCTTCCATGCTGCTCCCCA	TTGGGCTTCTATCCGCAGAG
GAAGCTTGTGGTTGTAGAGGCTGGT	TEDH-1048344	MMS19	CTAGATCAAAGGCCTCTGAA	CAGCCACCTAATGATCCCCA
ATGTTAAGGTTGTATATCGGTTGTT	TEDH-1048343	MMS19	CCTCACCTTGGGGAGCAGCA	AGACCCACCTCAGCAAATCG
CGACTGAGGTCAAAATTGTGTGATT	TEDH-1048347	MMS22L	AATTCTTTAATGCATAAACA	CCATTTCATCTGGTACTCCA
GTGGGTGGGTGACATGGAGTACGGA	TEDH-1048345	MMS22L	CCAGCCAATGTATATCCAAG	ACAGGCTTATTAAATCACAA
GTCCAGGTTGAAGTTGGGTCCGCAT	TEDH-1048349	MMS22L	GGAACTTCAAAGGGACAATG	TACTTCACCAAGGTATTCCA
GGCATCGTGCGATAATAGGTCGCTC	TEDH-1048359	MNAT1	TTTCTTAAAGATACAATAAA	GTAGATTTACTGTTTGTGAG
GGGGGTAAGGGTCAGGGCGGATGCT	TEDH-1048356	MNAT1	AAGAAGTATAGCCTCCAGCA	TATTTGGTGGTCTTACACCG
ACAACTGTCTCCCTTGTAATGAGTT	TEDH-1048358	MNAT1	TCACCACAGGACCTTGCTGG	AGATCCCACTGTTGACAAGG
GCTAATGGCGCGGGATTTTTGCTGT	TEDH-1048355	MNAT1	TCACCATCAGCTTCAAGGAG	GCACTACAGGATGCATTCAG
ACACCAAGGGAATGTTGCAAACTTT	TEDH-1048357	MNAT1	AAGCTGATGGTGAATGTGTG	TTCTTAAAGATACAATAAAA
CTCACACACCTGCTTTCCTATCTGT	TEDH-1048507	MORF4L1	GATAATTGAGTAATAAAGCA	GCAAATTACAAGAAATCTCG
GCCACCTCTAGAATTCTTGCAGTTT	TEDH-1048503	MORF4L1	CCCGAAGCCTAAATTCCAGG	AAATACTTCATACATTACAG
GGCATGCTTTTCAGTGGGTGGGCCG	TEDH-1048504	MORF4L1	GCCTCTTCTTTATGAAGCAA	CGCTCCATACACCTGGGACA
TTTTTCTGGCTGTGTAAAGCGTTCT	TEDH-1048506	MORF4L1	TATGCAGAGGGGAAGATGAG	TCTTCCTGCCAAGAAGAATG
GGGTGAGGCCACTGCAGTTTCCTCG	TEDH-1048511	MORF4L2	CCCTGATGCTCCAATGTCCC	GCAAATTGCAAGAAATCGCA
GGCGCATGTGCTGGGTGCCCTGCCT	TEDH-1048509	MORF4L2	GAAAAGCCTTGCATTATTGT	TAGACGCTCACAGGGCTTTG
GCTCTGACATGGACGGTGAAAGCTC	TEDH-1048512	MORF4L2	GGAGGCGTTTAAGAATAGAA	TCTGCAGATTGCTGTCCACG
GATTTCTAACCGGGTAGAGGCAGTG	TEDH-1048508	MORF4L2	GCAGAGAAGTAAAATGAGAG	TCTTCCTCACGGATCCTGAA
GGGTTTCATGCAGCCTCTTTGTTGA	TEDH-1048510	MORF4L2	GAGCATCAGGGTGAGCCAAG	AATAGCCCAACAATAATGCA
TTGCCCCCCGGTACTTGTTATTGTC	TEDH-1048604	MPG	CCTAATGGCACAGAACTCCG	TCTGTCGACCACACTGACCC
ATGGTATTAACGAGTCGGCGGCGGT	TEDH-1048603	MPG	TGTCCGTCCCACAGGGGACG	GGTGGGCGTCGGCCATGCAG
GCCCCGGGTGAGGGATTAGCCGGCG	TEDH-1048605	MPG	TGCATGGCCGACGCCCACCC	AGAACTCCGAGGCCGCATCG
AAAGTTTGGTAGACGAATTATTTGT	TEDH-1048606	MPG	GCTGCGTCGGACGAGCTGTG	GGGTGGGCGTCGGCCATGCA
GTGGTTCCTTGGCCCGTGACCCGTT	TEDH-1048638	MPLKIP	AGCTTCCGGGGAACCCCGGG	AGCAATACTCAAACATTCAC
TCTACTTCCTTTATTCCGCTGGATT	TEDH-1048640	MPLKIP	ACACGCCGCCGTACGGGCCC	AGCAATTCGGCTACTCCCCA
CACCAATGTGGCAGGAGTTTCAACT	TEDH-1048642	MPLKIP	AGTCACTCTCCGCGACACGG	CCACCCGGACCAGGGTAAGG
ATTCTAGTCAAGATATGGCTATTTA	TEDH-1048641	MPLKIP	GGGAAGCTGCCGCCGTGTCG	AAGCAGCTTCCGGGGAACCC
GTGGTCTACACGTAGTATATGTGTG	TEDH-1048729	MPZ	TTACCTGAGCCTCCTCTGCA	CCTGTCGGTGTAAACCACGA
TGTGGGGACGCTACAGTGGGAGGAA	TEDH-1048730	MPZ	ATAGATCTTCCACTATGCCA	CCTGGCGCTACCAGCCCGAA
AGGGCTCTGTAGATGTAGGCGCTAT	TEDH-1048732	MPZ	CCCTTCGGGCTGGTAGCGCC	AAGAGCGCATCCAGTGGGTA
TCTACCTAAGATCTGTGTGCCAAAA	TEDH-1048780	MRE11A	CAGAATTCAGCATCGAGAGG	AGCACAACTTAAAATGTCCA
GATCGTCACTCTACTCTTGGATTTG	TEDH-1048778	MRE11A	TATTTGTGATTCATCAGAAC	ATGGAGAAAGATGCAGTCAG
TCACCTGAGCTCATGGTGGTAAGTT	TEDH-1048779	MRE11A	GGGCAGAATTCAGCATCGAG	CACTACTAAGAATTATTCAG
ACAGCCAGGTACGTAGTGTCTACTT	TEDH-1048781	MRE11A	TTATTAAGAAAATATTGTAT	CCATCTTGATAGTTCACCCA
AACAAATGTACCTGCATAGTGTGTG	TEDH-1049394	MSH2	TTTAACACCCACAACACCAA	ATTCTGTTCTTATCCATGAG
CTTTGTTATCTGATAAAATTGTTTT	TEDH-1049398	MSH2	GATTCCATACAGAGGAAACT	AAATAGATAATTCAAAGAGG
CTAGGTTGTAGCCTGGCTGCGTTGA	TEDH-1049395	MSH2	GTGGATTAAGCAGCCTCTCA	CTGAAACTCCTCAAGTTCCA
CGAAGCACGCGTTGATCGCGAGGGG	TEDH-1049396	MSH2	CATGGATAAGAACAGAATAG	ACTGTAGATATCCAGAAGAA
CCACTATATCGGTCCAAGGTCTCAT	TEDH-1049399	MSH3	TCCTGAACTCCTCAGTCCAG	TCCACAGAGCCACATCTGTT
TGCTCGTTGCGCGAAGAGGGGTGTC	TEDH-1049403	MSH3	CAAACACACTAGATTCTGAA	TAGACTGATATGAAAACCAA
AATTGAGAACTCTGAGTTCTTCCGT	TEDH-1049402	MSH3	CAAAACCGCTTGCCTCGCAG	ATATAAGTATAGATTCTTTG
TTGTCCCCTATCAGTATGGGGTTGG	TEDH-1049401	MSH3	AAGAAAGTCCAACAAAAGGA	AGACCTGCAGAAGTGGACAG
TACTTGATGACGGCGCGGCTAATTG	TEDH-1049406	MSH4	GCATCCAAGACAATTGATGG	AATTATACTAAGACTCCTGG
GATGGGGTTCAAGATGAGCATGGTT	TEDH-1049404	MSH4	TAGGATACAGGGCATCAATA	CAAATACTGCTTGTGCTGTG
TAGTGCCGACTTCTAGAGGAATAAT	TEDH-1049407	MSH4	ACTGGGATAGTATAATTTGG	TGTCAGATTATGGCCCAGAT
CTGATATGTAGGGTACGTCGGCCTG	TEDH-1049408	MSH4	ACATAGGTATTGTTGGCAAT	ACAAAGCTGCAACAGCTGCA
TTGTGAACTTGCTTCCTGGGTTTCG	MSH5_4	MSH5	TCAGTGGCAGTCATGGCGTC	AGGACTTGTGGGGAGTAACG
TTAGCCTTATGGCTTTTTAATGTCG	MSH5_2	MSH5	TGAGAATATGACTCGATTTC	ACGTCCGACTCATGACCTGG
TATCAAATCGTGCTGAGGGGTTCCG	MSH5_3	MSH5	GCACTCGTAACAACAGACTG	TGTTCACCAGATGAGTCCTG
GTTGTGGTGCGGTTAATTTTTGGCG	TEDH-1049413	MSH6	GTGTAGATGCATCAAAATCG	AATAATCTTCTACTAATGAA
GTTTTCCTCGATTCGTGATCCTTCG	TEDH-1049411	MSH6	TATATCCAAGTATGATAGAG	GTTACTGGACCAAATATGGG
GACGTATGAGCCTATGGGCTTAGGG	TEDH-1049412	MSH6	AAGGCTTGCTAATCTCCCAG	CTCCAATAAGAGCATCCATG
GTTAGGAGTGTGGCGGGACAGGTCT	TEDH-1049410	MSH6	GACTGTAGAATTGAACCGAT	GATCTGTAGGATCATTACCA
CAGTCCAGCTATCGTGGCTTAGTAG	TEDH-1049579	MTA1	TCCGACCCTGTACATGTTGG	CGACTCGGTCTCGTTGAGCA
CATTTGCGTCTGTGGTACGGTGATC	TEDH-1049576	MTA1	CGGTGTGGTGAACGGCACGG	GGGCGGGCCCGTGCTCTGCA
CGTTGACTTCGGCCGGGGGCGCCTC	TEDH-1049575	MTA1	ATACCTGATCCGGAGAATCG	AAGTGGTGTGCTTCTACCGG
ATTATGCGTGAACTGGTCTTTTTAC	TEDH-1049577	MTA1	CGCAGGCCCGGCCAGCCCCA	GACGGCCAATGGGAACGTGG
TAACGGACAAGAACAGCTGGTAAAG	TEDH-1049578	MTA1	GAGACTCCAGCTGCCGGGAG	GAGAATCGAGGAGCTCAACA
TGTTTGATTAGTAGGGTGGTGCATT	TEDH-1049581	MTA2	AGATCCAACAGGAAGCACAG	ATCGGTGTCTTGGTACCCCG
GGTGGAGAGGAAATGGTCGCTAGGT	TEDH-1049582	MTA2	TCTTGCCAGACGCATGTGCA	ATGTCGACCCTGGTACCCCA
GGCCGGAGTGTAGGTGTATACCCAA	TEDH-1049580	MTA2	TCTTTGACGATAGTTGCCAG	GATATCTGTCTCATTCAAGA
ATACGGCACTTGCGTTTGATATTTG	TEDH-1049589	MTA3	TATGAAGGAAGAAAGCTTGG	CATAAAACAGGTCCTCCGAG
CCTTAACCGGTAAGTTCGCCTCTCT	TEDH-1049588	MTA3	GACACGTGACTTCTAACACG	ATTAGTGTCTTAGTACCACT
GTCGATGGGAGTGGCAGGGCGGCTT	TEDH-1049586	MTA3	ATCTCCTAGCCCAACTACAG	GGACAGGAGAATCAGATGAG
GGGTTCCTAGAGGGTGCTGCGAGGT	TEDH-1049821	MTOR	GAGCGAGGAGCTGATCCGAG	GGGCGTGCAGTGTGTCACAG
AACTTGAATCTAGTAATGGGCTTCG	TEDH-1049822	MTOR	GGCACAGGCCTACAACCCGA	GGAAAGGCATGACAAAGGCA
AGTGGGAGTAAACTCGTCCGACATA	TEDH-1049820	MTOR	GGTATGAGAAACTGCACGAG	GATACCTGAGTGTATCCTGG
CGCCTAGGGGTTCCCAGACGAATGG	TEDH-1049987	MUM1	TCTGTAGGCCAGTTCTTCCA	GGGCGAGGAGACATGCTCCA
TTCTTGTTCAATGGGGTAGCTACCA	TEDH-1049988	MUM1	ATCGTCCTCCCTGACCCCGG	ACTGAGCAAGGGGAGCCCCG
GATTATCTATGCCTGCCAAGTCGCC	TEDH-1049989	MUM1	GGACGAGGTGGACTACAAGA	AGGAAAAGTGAAAACCCAAG
TTGAACCGGACAGCTTTTGTTTACC	TEDH-1050002	MUS81	GATCCAGTACCAACTCCCCA	CGTTGAAGTCACTGAAGGTG
TTTTAGGGTCTAGGCATAGGGCGAT	TEDH-1050005	MUS81	GGAGCGCCGGGTATACCTGG	GGTTCCCAGGGGTTCCCCAG
TTAGTCCGAGAAGTAAGTGGTGAGC	TEDH-1050006	MUS81	CGGCAGCTGATGCAGGTGCG	GGGTTCCCAGGGGTTCCCCA
ATCTCATGCGGGGTGCCCCCATACC	TEDH-1050022	MUTYH	CAGGTGGTAGAGGAGCTAGG	GCTGCTCACTTACCTCCCCA
ATTTTCACGAGTCGGTCAATCGTCC	TEDH-1050025	MUTYH	CCAGAGCTGCTGGGAAACAA	GCTGAAGTCACAGCCTTCCG
TGCAGTTTTAGTGCAGCAAGTCGCG	TEDH-1050021	MUTYH	GGTATAGTAGTTGATCACAG	CGTGGCCGGCGGCTGCAGGA
TGGGGCCCCTATTCGTAGCAGGTGA	TEDH-1050046	MVP	GCCACTCCTCCCCAGTGCGG	CCACGTGCCAGATGTCCACG
GGGTCTGTGAGGCGTTTCTTCATGT	TEDH-1050047	MVP	GCAGGATGTCAAGACCGGAA	CCCACGTCACTACTGCACAG
GAGAGGGTACTACCTGAGACTATCC	TEDH-1050049	MVP	CAATCCGGGCTGCCTCCGCA	GGAGTTGGTGGTGATCTCGA
CCAGCAGGCTCCGAATGCTGGGAGA	TEDH-1050048	MVP	AGTAGGGGCGTACCTCCCAG	ACGACCTCCACTTCCTTCCG
GTTATCAGTGCGTATTCCAGGCATT	TEDH-1050114	MYBBP1A	GGTCCTAGCAAAGGTCACCG	TCCGGCCCTGCAGGGCTATG
AGTGTCGTACCTGGTCATCTCGGGC	TEDH-1050115	MYBBP1A	GAGAACGTTGAGCAGCTCCA	ACCACCTCCTTCCAGAACCG
GCCGATGGGCTGTGCGTTTGTGGTG	TEDH-1050111	MYBBP1A	GGGGAGCTCATACCTCGGAG	TGAGGAACATGGGAACTGTG
GGCCCTCGATAACCTAACTTGGTAA	TEDH-1050113	MYBBP1A	ATACTCCAGCAGCTTCTCCG	CCAGGCCACATAGCCCTGCA
CGCGCTAGCTGCTCCCAGGACCTAG	TEDH-1050748	NABP1	TATCGAGGACAGCAGAACAA	GTCTGACACTTTATACTGGA
GCCTGGGATGTCTAGGGTTATCTTC	TEDH-1050751	NABP1	TCTGACACTTTATACTGGAA	CTGTCCTCGATAATCTGGGT
ACGTCTTTCCGAAGGATATTATTGT	TEDH-1050752	NABP1	ACACTTTATACTGGAAGGGG	TTCTGCCAGCATGTGAAAAC
CACTTAGAATAATGTAGGGGCGTAC	TEDH-1050750	NABP1	AGGTATGCATCCATGTGGAA	TGTCCTCGATAATCTGGGTT
TTAGATGTCCTTCTCATATGAGATC	TEDH-1050753	NABP2	GAACCTTATCTTCATTGTGC	CGAGTGATTCGGGTGCTGGG
GGCGAGAGTGTAGGGGTAGGCTATG	TEDH-1050754	NABP2	GGTTCGGACCTGCAAAGTGG	CCAGCAGGCACCCAACAAGG
ACGCGCGTACACCTTTCGCAACGTT	TEDH-1050757	NABP2	AGGCCGAGTGACCAAGACAA	TCGGGTGCTGGGTGGGTGGG
GTCTAGTAATTGGATCGCTGGTAGG	TEDH-1050755	NABP2	CCGCCTTGTTGGGTGCCTGC	TTACTAACAGGGTTGCTGGA
GCTCGAGTTGGTGGATTTCAGAGTG	TEDH-1050756	NABP2	CAGGCGGGCCTGCAGGTGTG	GTAACGGCAAAGAAACCCGG
ACAGATACTCGGGCTAAACGAAATG	TEDH-1050800	NAE1	TAGCTAAATATTTAGCACAG	GGCAACATGATTACCCACAG
GGGCAGCGGTGGAGCGCTTCTGCAT	TEDH-1050798	NAE1	GAGGAATCTGGGAATTCCAG	TTAGCTATGATCACAATCCA
CAAGTTACTAGTACTTGATTGTGTT	TEDH-1050801	NAE1	AAGAATGCAGCAATGGTATG	AGGACCACAGTCATACTCCA
CCCAAAAGTACCTAATGGTGGAAGC	TEDH-1050802	NAE1	ATCATTATAAAAGAACATCC	AATAATACTTACATTTACAG
CCTTCTTTTAGTGTGAGTTCTAGGC	TEDH-1051070	NBN	CCCACCTCCAAAGACAACTG	CAAGAAGAGCATGCAACCAA
CGTCCGTGACCTTCATATGGTTGGC	TEDH-1051071	NBN	TTCCCGAACTTTGAAGTCGG	ATAGATGGTTCATCAAGAGG
CATATAATATTAGCAGGAAATCTCA	TEDH-1051067	NBN	CAAGCTATATTGCAACTTGG	AAAGAAAACAAATCTTCAAA
CTCCTTCAAGAGGGACCGTCTATTG	TEDH-1051069	NBN	TCCTGAAGCAGAAATTGGAT	AAATTTCAAGAAATTCAAAA
AGGCTTTATAAGCACTCGTGTGGGA	TEDH-1051159	NCAPD2	ATTCTTCTTCAATTATTGAG	GGCTCCTTAGACCAGATGAG
GGCTGGCGAATATGTGTTGTGCGGT	TEDH-1051161	NCAPD2	CTAACCTCATGGTTGCCACT	GCTCCTCTCCTACATCACCA
AGTACGGAGATGCGGGGACGTGCTG	TEDH-1051162	NCAPD2	GCGGATGGCCAGATCCCCAG	TCTGCAGCAGCTGGTCCACT
CAATGGATCGTAGGCACTAAAATTA	TEDH-1051163	NCAPD2	GATCCCCAGTGGCAACCATG	ACAGAGGCAGAACTAATCCG
ATCCCGGGGTATAAGAGCGGGTCGG	TEDH-1051167	NCAPD3	GTTACTCTCAGACACGTTTG	ACTGCAGCACATCTGTGCCA
GAAGCAGGAGTAATCCTTGCGTTAT	TEDH-1051166	NCAPD3	ATACAATTCTGTACACATTG	GCTTCCGGACAGACACTGCA
TTAGATCGTGGTGTCGGCGTGTCAG	TEDH-1051165	NCAPD3	TCTCCTTTAATTCATCCACA	GGAGGAATTTGTGAAATGGA
ATAGTCGTTGAATCTGGTTCGATGC	TEDH-1051170	NCAPG	ACTCCTCTCAGTGAACTGGT	CAAGGATGATGAATGCCCAG
CGGTACTTCGTCAGTAACGACCTGA	TEDH-1051171	NCAPG	CACTATCTAAGAAATCAGAA	TTCACGACTTCAGGATCCCA
GTCTCCGTGGCCCTATCAATCGGAG	TEDH-1051169	NCAPG	TTACCTGTACCTTCTCTATG	GTAGATTTGACAAGACCAAG
TCGGTTGGGGTCACGTGGGAGACAT	TEDH-1051175	NCAPG2	TCCACGGGATACACCTTCCG	AACTTCATCAAAATGATCCA
GTTAGCGAGGTTTGTAAAAGTGCGC	TEDH-1051177	NCAPG2	ACGAACCAGAATGTGCTCCA	CAGATACTCTGGAAGCACAG
ACTATCATGACTTTATTCTCCTGGT	TEDH-1051176	NCAPG2	GGCGTGGTTCATCTGCACCA	TCCTCGGAAGGTGTATCCCG
CTGCGACGGGTGTGTGATGGACGGG	TEDH-1051178	NCAPG2	GATGGATGCTCAGGCGACAG	GACTGTATCTGAGAGCTGGA
CTTAAATGTAAATGGAGTGTCATTG	TEDH-1051183	NCAPH	TAGTTACTTAAGATGGCCCA	GCCCACATCGACATGGTCCG
GGATCTTCGGGCGGCGGATAACCCG	TEDH-1051179	NCAPH	ATTAGACATCACAACATATG	TGATGAGTGCAGCACAGCAG
GTTCGGATTTAGTCCACCCTATCGG	TEDH-1051182	NCAPH	CTTCTTAAACTTGTCTACCA	CCTGATGTCTCCATCCCCAA
TGGGAGTGAGCAGCAGTGCCGGAAG	TEDH-1051184	NCAPH2	CGTGCGTTCCCCACCCCAGA	TTGATTTCATCTCTGGAAAG
AAGGATCTAGGGGCGTTCAAGTTCT	TEDH-1051187	NCAPH2	CTTCTGGGTCCCTGGCATGG	CCAGCTGGGCGAGTATCTGG
CGTATATTCTTCGCTAAGCACGGAA	TEDH-1051188	NCAPH2	TGCCTGCGTCTACAGTAAGA	GGTGGACGTGGCGGCCCAGC
ATCGCCAGTTTTTTGCTATAGTACG	TEDH-1051391	NDNL2	CCGTCGACTACGAATTCCAG	CTTCTGGCTCCTGGGCCCCA
GTCCTTCAGCGGTATACCTCGATGA	TEDH-1051390	NDNL2	GGGGTCTTGATTATGGACCT	AGCGTTACCTGGAATACCGG
ATAGTGCTCGTTTCAGTATGGAGGC	TEDH-1051388	NDNL2	GTAGTCGACGGGGTCGGTGT	GACGTACTGGAGGCGCTCGG
AGGGAGCCGTGTGTCATCATGATGT	TEDH-1051389	NDNL2	GGTCCATAATCAAGACCCCA	ACTGGAATTCGTAGTCGACG
AGGTTTCCTGAATGGTATCAGGGAG	TEDH-1051718	NEDD8	CACCTGGTGTTGGCTCTGAG	GGAGCGTGTGGAGGAGAAAG
GTAGGCTGCTTGTCTAGGTACAGCA	TEDH-1051719	NEDD8	CTGGTGTTGGCTCTGAGAGG	GCATGCATCACCTTGTCTGT
GGTATCGTACGATGGTAGCTGGAAT	TEDH-1051717	NEDD8	GAGCGTGTGGAGGAGAAAGA	GTTTCAGACGCTGACCGGAA
GGGGTCATTACGTATGAGTGGGAGA	TEDH-1051716	NEDD8	GGAGCGAATCAAGGAGCGTG	TCAGAGCCAACACCAGGTGA
ATGTTGTGTACGATTTAATTGATAG	TEDH-1051752	NEIL1	CTAAGAGGACTGCAACCCAG	CCCTCCCTCAGGATGCCTGA
CTGGGGCTGATTTAGAGGTTGCCCT	TEDH-1051751	NEIL1	GGCCACACAGCTGAGTCCTG	ATCCCATCCTTGGAACCAGA
TTAATGCGTGGTGGCGTAACGGTGG	TEDH-1051750	NEIL1	GCGGTAGGCACTGCTCTCAA	CTTTGACCGGCCCATCTGCG
TCATCCGTGTCCGGTGTATCCATTC	TEDH-1051754	NEIL1	GCTATGTCACTCAGTGCCCA	GAAGGCCCGCTCGGTCCTGG
TGATAAATATAGTTCGAAGGTCAGT	TEDH-1051755	NEIL2	CCAAGAAAGCCAACAAGAGG	ACTCCACCACGTGATCCACC
GGGGAAGTCGGCACTGCCACGGTTG	TEDH-1051756	NEIL2	TGGCTGCAGGGCAAGTTCCA	AAGCAGGTCGGGGAGCCCAG
GCCGTTAATCATTTGTAGATAGGTT	TEDH-1051758	NEIL2	GTGCCAGCCCCAGTTGTCAG	GTTCAGTACAGCCTGGCTGC
TTGAGACCCCGAGTGACCGCGAGGT	TEDH-1051759	NEIL2	CTTCTCAGACAGGATGTCAC	ATGGCCACACCATTACCTCG
CACTAGTGCCAGTGTTTGTGGTTGG	TEDH-1051757	NEIL2	CTGAACCGAGAGAAAGGGGA	ACTGGAGGGACCCTTCCCCG
TTTCCGATGTCGCGTGGGTCCTTCT	TEDH-1051764	NEIL3	CGGTTGTGTTTACTGCAGCG	AATAACTGTGTGCCGCTTTG
TGCTAGCTGCCTTGCACGGGTGTAT	TEDH-1051762	NEIL3	TTTAATGGATATGTTTACAG	GGATCATGTTATGGACTCCG
AGTGTTATATAAGGTAGTGTGTGTG	TEDH-1051763	NEIL3	AATCAGTTGGACATCTAGCA	CATACCTGTTAGAATATCCA
GGATCGCCGTACTTTGACGAGACCT	TEDH-1051761	NEIL3	CGGGGAGACCACAACCGTGG	CCACAACTCGGAGAATGCAG
CGATATATTGTGCGTGTTACATCCG	TEDH-1051765	NEK1	ACTAGAACGAAAGAGAAAGG	GAGTGAATACTGGAGAAGAA
ACGCGGCTGAAGTGCAATATAATTC	TEDH-1051769	NEK1	CCAGTGACATTTGGGCTCTG	TCCAATATGGAGTTGACTGA
AACACCTGCCCTGGTGTGGCGGCGT	TEDH-1051766	NEK1	GAGAATCAACAATAGCTGAT	AATCATTCTGAAGGACAAGA
ACCTCCGAGCATTGCCATTGTTCTC	TEDH-1051767	NEK1	ACTGAACTGATTGAACTTGA	AGTTGAAAGTCCAATCAGCA
GTCACCATAGAATAAGTCAACACTG	TEDH-1051779	NEK11	TGTAGCTGCTCATCAAGGTA	CAGAAAATCAAATAATAGAA
ATCTCTCAGCGATCTTATTCGACGT	TEDH-1051777	NEK11	TCTAATGGGATCCTGTGACC	CCTGAGGCTCTGAAACACCA
TCTGACATAAACGGTCACCGGACCC	TEDH-1051776	NEK11	GAGGCAGCTAAGTGTGTGAG	TCCCCATTATATGAGTCCTG
ATGAGTGATAGAGGGTTGGATTGTT	TEDH-1051778	NEK11	AGAAAATGACGCCAAGAGAA	ATAGCAGATGGTCTTAATGA
CAGAGGTAAGTGATATCGTGCGTTT	TEDH-1051775	NEK11	ACTTGCATGGAACTTGACAA	TAAAGTTGTGGCCAGGTCAC
ATAAATGCGGGGAATTCCTATGACT	TEDH-1051804	NEK6	TCACGCCGGGTGATGCACCG	ACCGAGCTTCACGACGCCCG
TAACCCGTGCGCTGACATTTAATGT	TEDH-1051802	NEK6	GCGTGAATGCATGTGCTCCA	TCCGATGTCAGGTCTCTGGT
TTTTATAGCAACTATTCGATGCGTT	TEDH-1051803	NEK6	CGTGGCTGTGATGAACACGT	TCCATAGAAGGGGCTCTGGA
TACATCCGTCAGGGGGTGAATCGCT	TEDH-1051811	NEK8	ACCTCTGCAGCGGACACTGG	TCCAGTGGAACAGATGACCA
AAGAGTCGTCAAGTCATTAATACTG	TEDH-1051813	NEK8	GGCAAATAGTTCTCGCTCAG	GATGGTCTCCTCCTCCAGCA
TATTTGCTTGCGTCGTGGTCTGAGT	TEDH-1051810	NEK8	CACCGATCTTGACGACCATG	TTGGGCACCAATACTCGCCG
AGTTGGCATTCTAGAAGTTGTCCCG	TEDH-1051812	NEK8	CGGGCACCCTGTAAGGTCCA	GCTGCCAATGCTCAACACAG
CGGGCCCGCTTGAGTAACTGGTGTA	TEDH-1051814	NEK8	ACTCACATCGAACAGCCAGG	CGAGCTGGCCAGCCTCAAGA
TATCGATGGGTTTTCTAGTCGTTGT	TEDH-1051817	NEK9	GGAGAAGGAACTGTACACTT	GGCCCCATTACTGTTCCCCA
GGTCTGCAAGTGATAACAGATGTGG	TEDH-1051819	NEK9	GTACAGCGTGGCTTCCCCGA	ATCAGATTATTATGGCTGCA
ACTGCTCGCGGCGCTGCCGGTGCGC	TEDH-1051818	NEK9	GGAACAATGGAAGCAGACCG	CTTCTTCCTCAGCAATCCAG
GGTCCACGACGTCGATCCTGGTTCG	TEDH-1051815	NEK9	CACGCTGTACCGCCGCACCG	CCACTGTGACCACAGCAAAG
AAATAACAGGCCACGAGTAATAGTT	TEDH-1051829	NELFB	GCAGCTCATCGAATACCGAC	GATGCCGTCCCTGCAGCCCG
CGGGTGTGGGAGTTTGTGTCTGGGC	TEDH-1051826	NELFB	GATGTACTGCTTCAGGAGTG	GCGGTTCGTGGACAGCAAGA
TTACTGCGGAGTTATGGTGCCGGTA	TEDH-1051825	NELFB	GAGAAAAGCTCTTCTCCAGA	CACCTGGCCTGTAGGCTCCA
GCGCTCTGACTGACAAAGGTGGCGT	TEDH-1051827	NELFB	CCCCACCTGGAACTGCTCGA	TGGACCTGCACGGGACGCCG
ATGGATGTATACTGGGGCTCGGGTT	TEDH-1051994	NFATC2IP	GCAGAGCTGGCAGATTCGAG	TCCTGCTTGGGGACACCCCA
AATAGTCGTTTACTTTTTGCTTACG	TEDH-1051996	NFATC2IP	GCAGAGTGTGGTGGACCACA	GCCCAGCGGTCTCCATCCCG
TTGCAGCTGGGCATATGTGCAGATG	TEDH-1051997	NFATC2IP	GGTTCCGGTGTACTCGGGGA	GTCAGCCCCAGACCTCAATG
CGATGCATGTCGCCACGGTATTTTT	TEDH-1051998	NFATC2IP	GGAATCTGGGGACCTCATTG	GGTACTAACAAGTTCTCCAG
GATGTGGTATATGTAGCCATCACGA	TEDH-1051995	NFATC2IP	TGACCTGGGCATGGAATCTG	TCTGCCTCCCACAGACTGTG
GGACGTCATGTAGTTTCTAAATTAT	TEDH-1052019	NFE2L2	TGATAGATCAGAAACATCAA	CACATCCAGTCAGAAACCAG
GATGGAAGTAGGGACTATGGTGGTT	TEDH-1052021	NFE2L2	CAAGCTGGTTGAGACTACCA	GCCATCTCTTGTTTGCTGCA
CGGGAACCGCTTAGGGTGTCGGGCA	TEDH-1052091	NFRKB	CTGGGACGTGGACACAACCG	GGTCTTAAGGGAAGTGAAAG
GCGGGGACTTGGGGACGTGGTCGCG	TEDH-1052092	NFRKB	CTATGTGGTGCGTCCCAGCA	TGGAACTGTCCATACTTCAG
CTTTAGATGGAGTAGTTTGTTCGGG	TEDH-1052090	NFRKB	AGGCCGGTCGGAGCGCAGCA	ACCCCTTCAGTACTGCTTAG
CTAGAATGGTGTTGTTGTCTAGGCA	TEDH-1052169	NHEJ1	CCTAGAGATCCAAGACTACC	GGAGATTATCCAAATGACAG
CCGTATTATTTACGTCGGTAAGTAA	TEDH-1052172	NHEJ1	TCATACTTACCTTGGCTCGC	GCAAGCTGTAGCCACGCCCA
TCTGGCTGGTACTGTTTTGGTTCTT	TEDH-1052170	NHEJ1	ATCCAAGACTACCAGGAGAG	TATGGCAGTCACCACACAAG
CACTCCGTGTCTTTTTGACCTCGTC	TEDH-1052205	NHP2	GGTGGGGCGCTTGGAGCCTG	AGAAGCCAGGGGCTGCGCGA
TACGATGGTTGTGGATCGTGCCTGT	TEDH-1052203	NHP2	GAACCCCATCGCGCAGCCCC	GCAGAAGCAGATTCGGCGCG
TACGAGAGGTTGTCCGTTGCGGGAT	TEDH-1052206	NHP2	TATCACACAGGTGGGGCGCT	GTGAGGCGGCGAGAAGCCAG
GGCAGGCTAGGTTTATAGTCTGGCG	TEDH-1052204	NHP2	GTTCAGAAATTTGTCAACAA	TGTAGAGCTTCCGCGTGAGG
CCTTTGCACTAGGCAGAGTATGGTG	TEDH-1052315	NIPBL	TAGACCCCAGTATTCTAGCA	TTACTGCTGTGTCATCAAAG
GGATTCGCTTAGTGCGTTCTGGTGG	TEDH-1052313	NIPBL	TCCTTCTTCCTTCATGAGAG	GGAGAGAGTTACAAAATCAG
CGTCGTGGCCTGCCATATCAGTACT	TEDH-1052312	NIPBL	GAATCTCCTTGTTTAACACG	CTTTAGCTTGATATGCAACG
GCTCCGGCCAAGTGGGGGTCTACCT	TEDH-1052515	NLK	CCAAAGGCTCCATATCCAAT	GTCGCCCTTCATCTAGGTAG
CATAGTTATGTTCATAAAGTGGTCG	TEDH-1052517	NLK	TAGTCGCCCTTCATCTAGGT	TCGGGCTCCAGAAATCCTGA
GAACTGGGGAGCGGGCTGCTTTATG	TEDH-1052519	NLK	AGTCGCCCTTCATCTAGGTA	GGTGCAGGTGAGGAGGAGGG
AGTGTTTGCCTAGATCTTAAGATGG	TEDH-1052883	NONO	GGTGACTCTCTGTAGGCAGG	GTAGTCATTGTGGATGATCG
TGGAAGAATTGTGGTAGATGCTATT	TEDH-1052886	NONO	ACTATTTGAGAAATATGGAA	CCAGGCTGTGCAAATCTGGG
CCGGCAGAGCCAGCAGTGGGGATAG	TEDH-1052884	NONO	ATCATAGTGGCAGGTCCTGG	ATGGGAGATATACCGCATCA
ATAGATGATTCATTTCTTAGTAATC	TEDH-1052882	NONO	GCTATGGGCATAAACAACAG	AGTTCCATCCGGCATCATAG
CTTATAGTCCCGTGCGCTCTCTTGG	TEDH-1052887	NOP10	AGATCGAGTCTATACGCTGA	TGGGGAGAACCGAGCAGGAT
CTAGCCGGGTTGTCACAGCTGATCC	TEDH-1052889	NOP10	GAGCAGAAATTTGACCCGAT	CAGTATTACCTCAACGAGCA
TATGTTACGGTTGTTTCGTAGGCGT	TEDH-1052890	NOP10	CACCATCAAGAAACGCTTCA	GGAGCAGAAATTTGACCCGA
GAGGATAAGGGACGTGTTGTCTGGG	TEDH-1052888	NOP10	TAAGGGACCCTCAGAGGACA	CTGGGGAGAACCGAGCAGGA
AATAGCAAAGTGGAGAGCCAGTGGC	TEDH-1052955	NOTCH1	TCCTCGCCCTGCAAGAACGG	GGCTGTCCCGGCAGGCCCCG
ATGAGGTGGCACCTAGCCTTGAGCA	TEDH-1052954	NOTCH1	TTGACGTCGATCTCGCATCG	GCACAACCAGACAGACCGCA
TTTGGCAATTGTTTCAGAATCGTTA	TEDH-1052951	NOTCH1	GCGTCGTGCCATCATGCATG	CATTGATGACGGACTCGCAG
TCACCCGAGTATTAGGTGACCTCGA	TEDH-1052953	NOTCH1	GGCCTCCAGCAGGCGCTTGG	CCCTTACCCTGAGTGCCCCG
GCCCGTTTTTCGGCCTCTGCAGCTT	TEDH-1052958	NOTCH2	GTACATACCTGTCCATTGTG	AAGTGTATCGATCACCCGAA
TAATTACCCACGGTAAATGACTAAC	TEDH-1052956	NOTCH2	ACTGCCCATTGTTCACACAA	CATTGGTGGATACAGATGCG
TGTCGACACGCCTTTTGAGACGAGA	TEDH-1052957	NOTCH2	TTTCCGCTGTATATGCCCCG	GTAGCTCCCAGTATAGCCCA
GGCGAATGAGACCATCTGCTGTTTG	TEDH-1052967	NOTCH3	CCTGGCCGTGCGCGTCCAGG	CCCGTGCTGATGCAGCCAAG
CTTTTTGTTCTTTGCTCGATGGCAA	TEDH-1052968	NOTCH3	GAAGGAAGCCAGCATTAGCG	CAGAGTGCCCAGAGGCCAAG
TTCTGTCTTCCGATCGAGCGTTTCT	TEDH-1052969	NOTCH3	GCAAGCTTCGGATGTCACAG	CAACGCTCCCAGGTAGTCAG
GTAGTATGTGAGGTGCCTTTGGTGG	TEDH-1052966	NOTCH3	GGTTGCTGCTGACATCCGCG	ATACACTGGTTTGCGCTGCG
CTCCTGTAAACGTTTTTGCTGCGGA	NOTCH4_2	NOTCH4	AACGCCCAGCTCTGCCAAAA	GTGAACCTGTGAAACCAGAG
TGCATTGTTAAATTTACCTGCGACA	NOTCH4_3	NOTCH4	GTCAGCCACCAGTGTCAGAA	GTGGATGAGTGTGAGACCCA
GCATTGTGCCCAAATAAGTGTTTGG	NOTCH4_1	NOTCH4	GAAACTGGCACGTCTCACCC	TCAGGGCCATGTCTCAATGG
TTGGATGCCTTCCGAGATGGCGTGC	NOTCH4_5	NOTCH4	AGGTCCCTTGTCCCAGAGAC	CCAAGTCCCTGTGAACATGG
AAACCGTATGAGATCGACCCTCCGG	TEDH-1053197	NPM1	GAAAATGTCTGTACAGCCAA	CTTTGAAATAACACCACCAG
ATGCGTATAGTCGCTTGCTATTACG	TEDH-1053198	NPM1	AGATAGTTCTGGGGCCTCAG	GCAGAGGCAATGAATTACGA
GCATACAATAAGCGACATGAGCCCA	TEDH-1053649	NSMCE1	GCAACTGGAGGAAGCGCCGG	CAGGATGCACTTACCCTGCG
ATTGTTCGGATTTGGGCCGTGTCTT	TEDH-1053648	NSMCE1	CCCACGCACTTGGGATCTCG	CCATTCCTCTAGCACGCCAT
TTGGCGCAGCGAGGGACCTGATACT	TEDH-1053650	NSMCE1	TGTGTGTCCCTGCAGAAGGA	TCAGTTCGTTCCCACATGCA
CCGGTCGGTATCGTTCGGGGGTTTT	TEDH-1053653	NSMCE2	AGCAGACTCTACACCACTGA	CTGACTTTCTTATATCCGTG
ACTTGTAATGCTATAGGGCTCCTCT	TEDH-1053655	NSMCE2	TCAAATTGGCTGTAGCCACA	GGACTCAATCATGCGAACAA
AGACCCCGTTGCATGAGGTAGAGTT	TEDH-1053656	NSMCE2	GAAGCGGTACCTTTGTAATG	CCAGGATGAAGCACTTAGAA
CGTGTTGAGTTGTTTGGTCTTCACT	TEDH-1053654	NSMCE2	TGTAATGGGGCAGGTGAAGT	TGATTGAGTCCAGGCAAAAG
TCCTTTCTTATAAGCCTATTCATTG	TEDH-1053657	NSMCE4A	CTGAAGCCAAAACAAGAAAG	TTACAGAAAGTGGAATGTAT
TTTGTTTGTATTAACACGTCAGCGT	TEDH-1053658	NSMCE4A	CACAGAGCCGTCGGATTCCG	GGTCCCGCCGCGGCTCTGCG
TAGCGCCACGTTGTTAGTAATCCAG	TEDH-1053660	NSMCE4A	CTGTGATTACTCCAAGTCAG	CCAGATCCGCCATCAGTACC
AGATTCTTAGCCATTAACTTCGGAG	TEDH-1053659	NSMCE4A	AATGTCCTTCTTTGACTTTG	GCGGGACCTGGGCGACAAAG
TAGGGGTGCCTAGAAAGGGTCGATA	TEDH-1053781	NTHL1	GCCATCTTGGGCCCAACACC	GCATGACCGCCTTGAGCGCG
AGGCGGCTCGGCCCGTTCGTGCGTT	TEDH-1053780	NTHL1	CCGCGCCCGCAGTCGCTGCA	TCACCCTCCAGAAACCGACG
TCGTCATGCGGTGATACGCTCATGG	TEDH-1053777	NTHL1	CTGGCTATGGCTGTGGCCTG	GGCGGCGCGGGTCTCCTCTG
CCAGGAGCGGAGCGTTTATACACAA	TEDH-1053921	NUDT1	AGACCATCGAGGATGGGGCT	TCTGCACAGACAGCATCCAG
TAATTTTAACCTCCCCAATGTCTGG	TEDH-1053920	NUDT1	CCTGGACTACACACTCCGCG	CCATCGAGGATGGGGCTAGG
GTGGACTTGCCTGGGGGATCTCGGC	TEDH-1053922	NUDT1	CCCAAAGCCATTCCACCGGC	AGACTCACCGTCGCTCTCCA
CCTCTTGATTTTACGCGTACTGCTA	TEDH-1053962	NUDT16L1	GGGCTGCCTGCGCCTCACCG	GTGCACCGCGCTGATCTCCA
GGGGTAAAACGTTGGGCGTTTAGGT	TEDH-1053958	NUDT16L1	GGTCAGTGCCAAGATGTCGA	GCACGCCGTGGAGATCAGCG
GATCCAGAGTACACAACTGGAGTTT	TEDH-1053959	NUDT16L1	GAAGCAGATCAGCCGGGTGG	CGAGGGCCCACACCGCGTCG
ACACCCGGTAGGCGCTGGCGGTCAT	TEDH-1053961	NUDT16L1	CGTACAGGTGCGCCACGACG	CGGTCCTTCTGGGTGTACAG
GTCATGTATCGGGTAGGGCGTGTGA	TEDH-1053960	NUDT16L1	AGTTGGGGAAGCCTCCGACT	TCAGGTAGTCGGCCTCGGTG
ATGCAAGGGCCCTCTGGGTCGGCGG	TEDH-1054404	OBFC1	CAAACCCCACAAGAGGGAAG	GCCACATACCTGGCACCTGG
TTCTTTATAACTATGACTGGGTATA	TEDH-1054403	OBFC1	GCGGATGCTCAGGCGAGCAC	ATAAACTTTCCTGTAGATAG
CAGGAGTTTTGATTGTGCGGTTCTG	TEDH-1054402	OBFC1	TCCGGTGGATCTTTCTGTGC	TTGTAGCTTCTTAAGTTGTG
AGGGTTTGGCTCAGGATATCCGTTT	TEDH-1054401	OBFC1	TCCAAACCCCACAAGAGGGA	CTTGTGCTTACAGTAAGTGG
TTCTTTGACAGATCGGCGCCCGGGG	TEDH-1054567	OGG1	CGCCCGCATCACTGGCATGG	CCAGGCGCAGCTCAGAGCGA
CGAAATCGTAGATGTGGACAGTGCT	TEDH-1054569	OGG1	TCCAGGCGCAGCTCAGAGCG	ACTCCCCGCAGGGCCAGAGG
TGCTTGATCGAAGTGTCTAGGGATT	TEDH-1054570	OGG1	TCATCAAGCTGGATGAGCCG	CGTGGACTCCCACTTCCAAG
TTCTAGACGGGGGGCGGGGCAGGGC	TEDH-1054566	OGG1	GGGAGTCCACGGAACCCCAG	ACTCACCAGCCAGGGCCTGC
TACGGATGTGGTGGGTTCGGGTGTC	TEDH-1054785	OPRM1	CCCCTCCACGGCCAATACAG	GGCAACCTGTCCGACCCATG
GGATGGCATCGGGTTGGGGATTGGA	TEDH-1054784	OPRM1	AAAAGGACAGGAATCTTCGA	TAGGTAATTCACACTCTGGA
ATGGCACAGGACGTCGGTATCCATC	TEDH-1054787	OPRM1	AGAGCATGCGGACACTCTTG	TCCACTGTATTGGCCGTGGA
GTTGGGCTTATTAGTACAGTCTTAG	TEDH-1054786	OPRM1	AGGTAATTCACACTCTGGAA	CGTGATGGCCGTGATCATGG
GTCCATTTCAAATTGGCCAGATTCA	TEDH-1054788	OPRM1	GATCATCAGTCCATAGCACA	CGGACAGGTTGCCATCTAAG
TCGACCGTAGTAACTTTGGCTTGGG	TEDH-1054826	OR10A7	AAGTAGAAAATGCCTTCTGG	TCAGGGGACTGGTTTGATTT
CGCCCGCAAAATTCCAGTCCCTTAG	TEDH-1054825	OR10A7	AGTGTTAAAACTAGTCACAG	ATTTGGTCCACAGAAAGGAA
TGTCCGTACGGCTGGCATTACCTTC	TEDH-1054829	OR10AD1	TGTCCCGATCATAAGCCAGA	CAGGCCCATGTGTGCTGTGG
CTGAGGCGAGCGCGATGTCGTGGGT	TEDH-1054831	OR10AD1	TAAGCCAGAAGGTCTGTGTC	TCAGGCCCATGTGTGCTGTG
AGAAGCTTACTTAAGAGCTGCCGTT	TEDH-1054830	OR10AD1	AAGCCTCCTCCTCAGGTCGG	CGTGGTAATTCTCAGCCCCA
GGGTCCTGGTTTGGTGCCTTATAGA	TEDH-1054839	OR10G2	CACAGCCGCTGCCCCATCCA	AACGGGATAGCCTTGATGGA
GACACTGTTTTCAGGGGTCAGAATT	TEDH-1054841	OR10G2	CAGAATTAACATGAAGCAAC	TCCATCAAGGCTATCCCGTT
CATTGTCAGATTTTAAGAAGATGAC	TEDH-1054842	OR10G2	TATCCCGTTTGGTGGCTGTG	AATTAACATGAAGCAACTGG
GAGTGATGTTATAGGTAGGGACCGG	TEDH-1054883	OR10H3	TCTGCGTTCAATCCAAACTG	CCATCGTTCCATCACCTTTG
AGGTGGTTATAGCATAGATAGGCAT	TEDH-1054881	OR10H3	TTGTGTATCCCACCTCACTG	GCACATGACAGAGAAAATGG
GGGAATTGCTGTCAGGGTGGTGCGT	TEDH-1054882	OR10H3	CTTATCTACCTCAAACCCAA	AACATGCTAATGAGTCCCCG
CAGCTTTCATATTAGCGGAGTACCG	TEDH-1054890	OR10H5	CATCTTCAGCCTCAGGAACA	AACGTGCTCATGAGCCTGCG
TTTATTTACTGTGTTACAGCCCAAC	TEDH-1054889	OR10H5	CACCGAGATCCTCTACACCG	CATGGGCTACGACCGCTACG
TGAGCATGGCGCGGGTGGTCCGGCG	TEDH-1054893	OR10H5	CATGAGCACGTTGTAACGCA	CCTCTCCTATGCCTTCATCG
GCGGGACAGGGGGCGTCAATCGAGG	TEDH-1054926	OR10Q1	AGAGGATCATCAAGTAGAGG	TCCTCGGTCCAGCACCTCAG
AAACGCTTGAGTGGGGGACCGATTC	TEDH-1054928	OR10Q1	CGCACGGAACACAAACTCAG	GATTAAGGCGGTGAGCTGCA
TCCAAGATCATAGGAAAGGCCGGTT	TEDH-1054924	OR10Q1	CAGTGGCTGTGGTGAACGCA	AAGCCTTCAGTTGGCGTCAG
GGATGCGGCCTGCCTAGGGCCGTGG	TEDH-1054930	OR10R2	CTTGGCAGAAAACCTCACCA	AGTTGGTAATGGCAAAACCA
GCGTTAACCGGGTAACCTGTTGTAT	TEDH-1054929	OR10R2	GGGCCAGCTGAATTTCACCA	AATAACAACACTGAGGTGAG
ATCTTTCTATTTCTCATGGACGGCA	TEDH-1054931	OR10R2	CTTATGAGCTGGCAGGTGTG	CAGATGTTGAGAGAATGCCA
AACTCAACCTGGCAGTTGTTTTAAA	TEDH-1054938	OR10S1	TACAGGCGAGCTTTAGGACA	TTGCGCATCCGCACAGCCCA
TTTTAAGCAACCAATCTTCTTGGAT	TEDH-1054934	OR10S1	CAGTGAGCTGGGCAGTGCAG	TGAGAAGATGACCATGACAA
GATAGTGCATAGTAATGCTCCACAT	TEDH-1054935	OR10S1	TCATCTTCTCACACACAGAG	CCTCATCTACAGCATCACTG
TATATAGTCCCCTTTTTGCATCCTC	TEDH-1054940	OR10T2	GATGAACTGTGTAACCACAG	CATATCCCATCACAGCAATG
GACAGGATTATAGTTTTGTGTTGCT	TEDH-1054939	OR10T2	TAGACAAGAGGATTAAGTAA	GGGCCGCAGATAGATGATAG
ATGTCAGGGGATCCAGGGTTTGTCA	TEDH-1054942	OR10T2	GTAGACAAGAGGATTAAGTA	AAAGACCACAGTGAGATGTG
CAGATGAATCCATTTAAACGTTTGA	TEDH-1054944	OR10V1	CAATTGTAGCATTTCCACCG	AGCAGGTAGAGTAGGCTTGC
GCATGTACCTGGGCCCACGCCCTTC	TEDH-1054945	OR10V1	TACCAGCAGCTCCACACACA	CATGCCTGCAGTCATGCGCC
AGTTGTTGCGCTCATCTTTTGATCT	TEDH-1054948	OR10V1	TGGAAGATTAAAATGGTGAG	CAAGCCAGGCGCATGACTGC
GGTCTTTGAGAGATAGCCCGGACAC	TEDH-1054959	OR10Z1	TAAACAATGGGATTAAGGAG	GAGTGACTAGATACAGAGAG
GAGCTTTGGAAGTAGTACCCTTTTC	TEDH-1054962	OR10Z1	CCAAGAGGACCAAAAGACTG	CAGATGGCTATCCAGCCTGA
GAAGGATTTGGGGGATCGGGCATTT	TEDH-1054960	OR10Z1	TATAAACAATGGGATTAAGG	TAATGACCAGCTGGGCACAG
GGACAAGGGTGCCGGTTGGAGTTCA	TEDH-1054971	OR11H1	TATTAGGATAGAGCAAGGGA	TTGTAGTAAAGAGTGAGAAG
AGTAGGCCCTTAGCCCCTAGGGCTG	TEDH-1054969	OR11H1	ACACAATCCAATGCAAATCG	TCTGAGAGATGAGAACAATG
CGCTATGGTCCTACGAAAGAGGCAT	TEDH-1054972	OR11H1	ACCATGTTGTGTGTGACCCA	TTATGTCTCCCAGTGCTTGA
TAGCTACCCTGCACTACGATACGTC	TEDH-1054992	OR11H6	TCTGCATCTCCCTTTGACCA	TCTATTCTATGGAACCCTTA
ACGCGTGGACGCTCGCGGGGGGGGC	TEDH-1054991	OR11H6	GTTTCCCAGAAGGATGTACA	GATCCCAAGATGGAGAGGAA
TAAGGCTTATACGTGATCATCACGG	TEDH-1054989	OR11H6	GGCCTGGGTCACACACCAAG	TGTAAGATCCCAAGATGGAG
TTAGTTATGAGCCAAGAACTTAACC	TEDH-1054999	OR13A1	CATTATCCATTTCTTCTGCG	GCGGGCTGGCCACAGCCGTG
TGGCTCACGCTTATTTAAACCCGGG	TEDH-1055001	OR13A1	GGTGTAATACATGCACACCA	GCTGCAGGAGAGAAGCAGCA
CTTTACATCCGGCTGCCGCGTCCAA	TEDH-1055002	OR13A1	AGAGAGCTCCATCTCCTACG	CGGTGTCATGATTGTCCTGG
TCACCGGTTTGGGTGTATCGGCATC	TEDH-1055005	OR13C2	ATGATGTTATTCCTGCAGAA	CACACACTCTGTTGTCCCCA
GACACGAATATCGTAAAAGATCGTG	TEDH-1055004	OR13C2	AATTATATCCATGTTCTATG	ATGATGATGGGATATCTCAG
CAGCATCGCGGCTGTTAGATGGGGG	TEDH-1055007	OR13C2	GATGGCCTTTGACCGCTATG	AGGAAGCTCACTAGCGTGGA
AGTATCGAGTTGTATCTGAGGGCCA	TEDH-1055014	OR13C4	ACAACTTGCAAGCTACAGAG	TGTTCTTTGGGTTTGCAATG
AGTGTTTGATCGTAAAGGGAACCTG	TEDH-1055016	OR13C4	CCCCATCATCATGAACAAGG	GTATGCAAAACCTAAGTCCC
AGTTAGGGAGCTTTGTGTTTCAGTG	TEDH-1055018	OR13C4	ATACCCCATCATCATGAACA	CCAAGGAGGTCCTGGGACTT
GACATTCCATTATTAAGACGCCCCC	TEDH-1055054	OR13J1	CTTCACAGTCCTCTATGCCA	GGGCGTGTAGCAGATGTCCA
TAACTGGAGCGGTTCAATTCTGATG	TEDH-1055058	OR13J1	GACCAGCATCAGAGGCACAA	AGGTGAAGTGACTGACCACG
CAATCTCAACGCTTATCATCAACGT	TEDH-1055055	OR13J1	GGACAGGCAGATGAATGCCA	AGGTACATGGCTGAGCACAG
GTGTATGACGGCTGTAAGCGAAGTG	TEDH-1055080	OR1A2	ACTAGCTGTGAGCAGAGTGT	AGCAAGTTCATCTCCTTTGG
CAGTATAATACGAACGGGGGCTTAT	TEDH-1055079	OR1A2	TAGCTGTGAGCAGAGTGTGG	GACTCTTGGTAGATGGAACT
ACATGCATAGGCATTCTCTTGAGAG	TEDH-1055081	OR1A2	CCCAAGACCCAGCAATAAGC	TTGAATAGACTCTTGGTAGA
CCTGAGTGATCCCCACCGTACCAGA	TEDH-1055100	OR1D5	AAGAGGTAGTGGATCTCTCG	GAGGAAGATGAAGCAGCCAG
TATAGCACTTGGATTTATTGACCGC	TEDH-1055103	OR1D5	GGATGTGGTCATGAACCCTA	CAGCACCGTGACCAGGTACA
TTTGGCCCGAGAGGTGTCATGATTG	TEDH-1055101	OR1D5	TAGCAAGCGTCCCATAAAAG	GAGGTTGTCCAGGGTCACCA
AACGTATATTAAGGGATCTGTATGT	TEDH-1055108	OR1E1	AATTGTCTCCTCCATCCTCA	CCTGGAGAGCTTCCTCCTTG
CTATCGCTACAGATTTGAGCAGCGA	TEDH-1055107	OR1E1	GGGTCAGGCAGTCCGCATAG	CATGATGGCGGTGTAGTGCA
CGATCTGGTATGACCACTATTTTTA	TEDH-1055105	OR1E1	CTTCCTGTTATTTGGAGACC	GATGGGAGTCCAGTCGAATG
TCTCTGCATCTCAGTACATACAAAG	TEDH-1055113	OR1E2	CCCCATGCTCTGTCTCTCCG	CCTCAGGCTGTAGATGAAGG
TTATACCGGATTAGGTCGAGTGCTT	TEDH-1055112	OR1E2	CAATTTGGGCATTGTGACTG	TTCTTCTAAGGGTATCTGCA
GTTTGCTGGACATTCTCTGCTTAGG	TEDH-1055111	OR1E2	AATTGTCTCCTCCATCCTCA	GATGGGAGTCCAGTCGAATG
TGTTACGTTGAAAGACAAAGATTTC	TEDH-1055115	OR1F1	GGTGGCACACGGCGACAAAG	CCTGAAGGTCCCATCCACAA
GTGGTTGCGCGCACCGAGTGGGGTT	TEDH-1055118	OR1F1	TAGTGTCTTTCTCAGCTGAG	CATCTTTGCTGTGTAATGTA
CGGTATTTGTGTGGCGACTACATCC	TEDH-1055114	OR1F1	AAATGGGGTGATCATGACCA	TCTTTGCTGTGTAATGTAAG
TGGGGCTAGCTCCAGGGTTAGTTTG	TEDH-1055127	OR1I1	CATCCCATCCCCTACCCTGG	CCAGCAGCAGCCCACAGACA
ATCAGGAACTACCGCTGTAGACATT	TEDH-1055125	OR1I1	AAATGCGGATGTACGAGAGA	ATAGGGTGTCAACGAGTGAG
AGTCAGATCCCGGGGTATATCTTAG	TEDH-1055126	OR1I1	CATTATCCTGGCCATCATCA	TCCACTTGCCCCGAGTAGAA
GGTGGATGAGGCCAATGGGGTTCTG	TEDH-1055160	OR1L4	CGCGGAACAGGGAATGTAGG	TCCACTTCCCGGCTGCAGAG
CTGGCCAGGACAATGGGGACATGTC	TEDH-1055159	OR1L4	CAGTGAGTAGGTACATGATG	TCCATGTACTCAGTGATGAA
AATTTAGTTAGGTAGGTTCAATTTC	TEDH-1055162	OR1L4	AGGAACAAAGATATGAAAAG	CACTACTGTGTACATAACTG
GTGGCAAGAACGTGATGCAGGTCAT	TEDH-1055166	OR1L6	ATGATGTGGTTATGAAACCA	GACAAAGGTTATCTCCTATG
TCCCTTATGCTACGTCGGTGTTCGG	TEDH-1055168	OR1L6	CATAACCACATCATAGTGTA	GCTGGAGGATGTGTCAGAGC
TAACTGTACATCTCTGTGGAGCAGT	TEDH-1055165	OR1L6	GAAGATGATACACAGGAAGG	TCCACTTCCCGGCTGCAGAG
AGGACGGGTATTTTCTAGTTTGTTC	TEDH-1055182	OR1N1	CCAGCACAATGCAAGCATTA	GAGGCGCTGATATTCCTCGG
AAATTAAAATGTTGGCATGGTACGA	TEDH-1055179	OR1N1	CAAGCATTAGGGCACAGACT	GAACATGACAGCTTCAGGAC
AGGAGCGACGTTTAAAATCGGCTAG	TEDH-1055181	OR1N1	TCTTCAGAGGCAATGGAGGG	TCATGACTGTGGAGTAGCAG
GTGTTTGATGTAGAAGATGGCGCTA	TEDH-1055271	OR2B11	CAGTATGGTGTCATTCACAG	CTTCCACTGGCTGGGATGCA
GTCGGCGATTCGACCCGGCGGCTAC	TEDH-1055272	OR2B11	GCATGAGAACGGCATAGTGC	GTAGGTGAAGGGATTGAGAG
TAGGCACGGTAGAGTTGGGGGGTCG	TEDH-1055274	OR2B11	TGTGGAGTTGAGGATCCACC	GGTGAAGGGATTGAGAGTGG
TCCTAAATTTCACCAGATGGGCTTG	TEDH-1055309	OR2F2	GTGTGCCTCTCACCTCACGG	ATAAACTTGTTAGTGCACAT
CACCACTTCCATTTTAACGGGCTTT	TEDH-1055313	OR2F2	TTATAGTCTAAGGAATAAAG	GGCATAGGAGACATCGACAA
GGGTTACGTGTCAGCAGTTATGGTA	TEDH-1055312	OR2F2	AACAAACTCAATCCCACCCA	AATCGTTGTGCCGTAGCACA
CGGGGCGTCCTGCAGATAAACGGGA	TEDH-1055335	OR2L13	ATGTGTGTGAAGATGATTGG	ATAGCCCTAGACCTGCAGTA
CGGGGATGTTTAAGGGACCCTCTTA	TEDH-1055337	OR2L13	TACTTGGGTCTATGAATATA	TGTCTATCATATGCACTCAA
ATAGTATGAGTACTTAACGTACTCG	TEDH-1055334	OR2L13	AGCTTTGCACACCACATCCC	CATGGCCGAGTTACCCACCG
GGGCGCGTGAGATTTGACTACTTCG	TEDH-1055341	OR2L2	ACCGCATGCACTCTGCAGAA	CTACAGCCTGAGAAACAAGG
GGGGAAAGTATGGACATAGCTTGTG	TEDH-1055339	OR2L2	GAAGGACACTACAGTGAGGT	AGATGTAATTTAGGTCAATG
ATGAGCTATCCGTGCGTGATGACTA	TEDH-1055340	OR2L2	ATCCCTGCGATCTCCAACAG	GTAGGAAATACATAGGTGTG
TTCTAACCTAGGTTAGGTATTCGTA	TEDH-1055398	OR2T10	AAGAGAGCTTCAAAACAGCA	ATGAGCACAGAGTAACGGAG
GCATTGGCCAGGGGTGACCATTGGG	TEDH-1055397	OR2T10	CCATAAGATGAACTCAGTTG	CATGGCCTATGACCGCTATG
GAGCATTTAGCGATACATGTAACTT	TEDH-1055394	OR2T10	ACCAGCAGCCTGATGCCAGG	GTACATGGGAGTATGCAGAG
CCACCTTCTTAACATTGGCGTGGCT	TEDH-1055419	OR2T29	ATCTCCCAGGATCTGCAGAA	TCATCCTGTGGACGGTGAGG
GTGCTGGTCAAAAGCTGTGTCCGGA	TEDH-1055422	OR2T29	AGGACAGGATCGTTACAGCA	CCCTGTCCTCATGAACCATA
GGATATAGTCTATTGTGCTTGCATT	TEDH-1055420	OR2T29	CATGGCCTATGACCGCTACG	GACACAGCATAGGTACATGA
GTACCCACACGTTGCGTCCAAGTTT	TEDH-1055442	OR2T35	CATGGCCTATGACCGCTATG	GACAGTGATACAGATGTAGA
TATCGGTTATTTGCGAGCTTGTTCT	TEDH-1055440	OR2T35	GCTCCAGGACCTCCTGTCCA	CATGATTCTGCTCATCCACA
GAGCATGTTTCGAAGAATATCTCGA	TEDH-1055439	OR2T35	CCATGAATAAGCAAACCCTG	TCATCCTGTGGACAGTCAGG
TCCCTACGAGTTCTCGGGGGACAGT	TEDH-1055470	OR2V2	GGCTGAGGAAGAAGTACATG	TTACAGCTTGAGGAACAGGG
TTGTTCTTATTTTGACCTCGGTTTG	TEDH-1055473	OR2V2	CTTCCCATTCTCCATCATCG	TCTGTCTTGTGGGATCTGAG
AGAGCACTCCGTAGATGTTCAGTTG	TEDH-1055471	OR2V2	TGACCTTGTCCTCTTCTCCG	CCTCATCTTCCTCATCTACA
GAGAATTCGTGTGATTGAATTGGGT	TEDH-1055522	OR4A47	TTATGTATGCTAGACCTGCT	CTGGTAGTGTCCTGGGTTGG
TCGGCGCCTGTTGGGGCGGTGGGGG	TEDH-1055523	OR4A47	TGCTATTGGCCTCTTAGTGG	CTTATGTACTACTTGATATG
AGAAGTGGCTCTTTAACTAAGGCGG	TEDH-1055521	OR4A47	CTCCATTGGCCACCACTAAG	CATGCAAGATTGGAAGGATA
TGGTCTTTATTTTTATACTACAAAG	TEDH-1055525	OR4A5	TATTTCCTTCCAAGGTTGCA	GATGGCCTGTGATCGCTATG
AGACCTGGAGGCTGTCTGTGTGATG	TEDH-1055526	OR4A5	CTATAAATGACAGGCAGGCA	TTGGTGGTGGCCATGATTGG
GCCAACATTTCGATGTGATGCGGGT	TEDH-1055528	OR4A5	CAATAGTGGAGCAATCTGTA	ACTCACATACTTGGTGACAG
ATAATACTTGTAACAGGGAGTCAAG	TEDH-1055532	OR4B1	TGTGCAGAGTGTATGCTTTG	TGTGCCTCCCCTCTGCAGAA
GTATACGCATCGGCAACTGGGATTG	TEDH-1055530	OR4B1	TCTGGTGGCTGGTTCCTGGC	CTGTGCTTCTCACATCACAG
GGTGTGAGGCAAGGGAAGGCTTCTT	TEDH-1055531	OR4B1	ACTTGTGGCTGTATTCTACA	ATTAAAACCATCTCTCTGGA
GTTGCATTCTGGGTGTGGTTGAGTG	TEDH-1055535	OR4C11	CAGTGCCAAAGGGAAGAAAA	GCTGTTGGTGTCTAACAGTG
AGCTGCTCGAGGGGTGCAGGGCGTA	TEDH-1055536	OR4C11	TCCATGGGGAAAGTGGTCGG	CATGATGGTTGGGTAACGCA
TAGATAGTTTGTGTATACCTAATCA	TEDH-1055537	OR4C11	CCCAACCATCATGAGCCAGC	GTCCATGGGGAAAGTGGTCG
GAGATATATTGTGGTGTATCCCTTG	TEDH-1055567	OR4C45	AGCTTTGTCAGTGGGGAAGG	ATTCTGGGATTTGTGCATGG
GGTCCATGTTATAGTTGTGCTCGAA	TEDH-1055565	OR4C45	ACCTATGTGTGGATTCCTGA	GCACAGACACTCACACCTTG
GGGTTCCGGTCGACTGGAGATTTCG	TEDH-1055568	OR4C45	GGCAGCAATCAGAGGCCCCA	AATCACCTACTTGATCACAT
AGCCCTGTCGCGCAGCCATAAGGAC	TEDH-1055573	OR4C46	CACATAGGAGACCAGCAGGA	TGTCATCTATATCATCACTG
TCTACTTGGTTATTAGAAACACTGC	TEDH-1055569	OR4C46	TGACCACATAGGAGACCAGC	AATAAAGGAGAGATAGGCCA
TTGGAGCCAATCGAGTATGAGAGGG	TEDH-1055572	OR4C46	GTTAAACTTTGCCCTCCTGC	ACATTCACTCTATGGAAAGA
GAGTAAATCCTAGGATCAGGCTGTC	TEDH-1055579	OR4D1	CCCACTCGGGAAAGGCAAGG	AGATCGTCTTGGTCTCATGG
CTGTTGGACTTTACGCTTGGGTCTT	TEDH-1055580	OR4D1	CATGAACACTCAATTGTGTG	AGATCATGAGGAACTCCAGG
ATTACTGTGCACCGTTGGGTGTTAT	TEDH-1055583	OR4D1	AGGTGACTGTGGAATAGCAG	ACCAAGACGATCTCCTACCA
CTGGGGATTAGGGCATCATGTGTGT	TEDH-1055602	OR4D5	TTATGGCAGCCTCCTGGGTG	AGCTTGTCAGGCCCACAGAA
CAAACGTTAGGCTTTGGCCGGTTGT	TEDH-1055599	OR4D5	ATTGCCCAAGAGAAAATACA	TCTTGATGCCTCCAATGAAG
CCTCTCGTGGCGCCAGGTCGTTTGT	TEDH-1055601	OR4D5	CAGCATCCTAGGTGCTGTGA	ATAGATGGCAGGATTCAGCA
CGGTATACGGATTTAGCGTCAGGTT	TEDH-1055606	OR4D6	CATGAAAAGCTCCAAAGCAA	CCATGATGAGGAAAGAGGTG
GATGAATTGTAGCAGGGTCTGGGAG	TEDH-1055604	OR4D6	TATCTGCCCCACCAGCAAAG	GATCAACCACACTAATGTGA
ACATGAGGGCTCTGCCTAGCAGGGC	TEDH-1055605	OR4D6	GAAGAGTCACCACCAGCATG	CCACACCTCTTTCCTCATCA
ATTGCGGGTTTGTAATTTCGAACCA	TEDH-1055620	OR4F15	ATTGGACCAATGAGTGGATA	GGAAATTACCAGCAAGACAA
CAACAGTACTCAACATAAGGACACC	TEDH-1055623	OR4F15	TCATGGGACTCACCAACTCA	AATATCACAAATCATCTTAG
CTATCGACGTCGATAGGATTCTGTA	TEDH-1055622	OR4F15	CATTGGCCTTATCCACTCAT	AAGCTGAATCTCCCGTGAGT
GGCTTTGAGTACCCATTTAGCAGAC	TEDH-1055633	OR4F21	TTCATGGTCACTGTTAACAG	AGGCAACAGCCAGAAATGAA
ACCTTAGGTGATTACGCTTTTACCA	TEDH-1055632	OR4F21	GGCCAGTAGAAAGTACATGG	CATGGCCTTTGACAGATATG
AGTCTGGCAAAGTAAGGGGGGAAAT	TEDH-1055635	OR4F21	CAGGGAGTGACTGACACCAA	CATAATGGTCAGATAGTGGA
GTCTATCCCACTTTTACCGTCTAGC	TEDH-1055651	OR4F6	AAGAAACTATCTAATTCATT	GAATTTATCAAGATGTGATG
TGTCGGTAGCCGTAAAGGCGATCAT	TEDH-1055653	OR4F6	TGACCATCATGAACCCACAA	GTTGTAGACCTGCTGTTCTG
ATTTTAATTTACGGCATATACGTGA	TEDH-1055652	OR4F6	ATACCAAATTGATGATGGAA	GTCAGCTCATGTCATTGTGG
GGCGCGGTTTGCTAGTAAATTGGAG	TEDH-1055657	OR4K1	ATTATGACCCTAACGAACAG	GGTCCACTGTAAAAGCCAAG
TGGGTAATGTCAAGTCGCTCTGCTG	TEDH-1055659	OR4K1	TTGCATGGATACATATGAAA	TGTGTCTATTTCCTGGGCGG
CATTGAGGACTGACGCCGTGTAGGG	TEDH-1055655	OR4K1	AAGATGTTAAAGCAGCCATG	CATATATAGAAATAAATGCA
TTTAGGAACTTGTGATATACTGGTT	TEDH-1055666	OR4K14	TCACGGTGTAGGAGATCAGG	ATCCCTGATCATCTTGGGAG
TATGAAGGGATGGTCGTGCGTGTAA	TEDH-1055667	OR4K14	GGACCCACAGAACTATTCCT	CTTCTTGCACTTTACTGGTG
GCGGGCGAGACTGAGCGTTGACTCT	TEDH-1055669	OR4K14	GAGGAGCAGAAAACAGCTCA	CATGGCCTATGACAGATATG
ACGAAGTCCAGAAGATATCGTAGTT	TEDH-1055676	OR4K17	AGGCAAGCTTAGTAACCAAA	TCTACAGAGTGGTTGCCGAA
CATGCGATCGCTTGGACGTGGGGAG	TEDH-1055679	OR4K17	TCTTGGGTCTCCTTCACTCA	AATGGTACTGTTGGTCTCCA
TAGTTGCGTGGTTTAGTGGAGCCAG	TEDH-1055677	OR4K17	TGATGGTATAAAACACAGCA	CAGGCAAGCTTAGTAACCAA
CCCTCCAGCAAAGTCTCTCAGTCAC	TEDH-1055692	OR4L1	TATTTGTCATTGCTGACAGC	ATAAATACTCGGATTCAGTA
TTCATAATCTTATGTTGCCTTAGTT	TEDH-1055689	OR4L1	TGTGATAACTGTATAAAATA	CCCACACAGAGATGGTCTTG
ACTGGTCGACCCTTATTTTGGGCGA	TEDH-1055691	OR4L1	GATCTACGGTGCTACTGTGA	TTGCTTGCCAAACTACTGAA
AGCGGCCGTGCGTTAGGTTCTAGGG	TEDH-1055714	OR4N5	TGACTGCATAGGAGGCCAGA	ATCGTTGGTTCTGTGGCTTG
GAGAAACTCAGTGCTGGGACCGAGT	TEDH-1055715	OR4N5	GGGCTACTTGTACAATGGAA	TTATACGCTTCGCAACCAGG
GGTATGGTTAGTGATGATACACGCA	TEDH-1055717	OR4N5	GATGTTCCTCCTCGTTGTGA	GAAGGCCCAGGAAGCACAGG
TGGACGATGATGCGTGGGACGGGGT	TEDH-1055722	OR4P4	TGTTCTAATATACACATGAT	AGCAAAGGTCGGAGAGTGAG
CGGGTTGGCGTTGGTAAGAGTTGCC	TEDH-1055721	OR4P4	AATTACATGAGAACTACAAG	GATGGCCTATGACCGCTATG
AGGTCTTAAAGGAGAGGGCATGAAC	TEDH-1055719	OR4P4	CATGGGTTGGTGAATGAGCT	GATGGTGAGAAGAAACTGAC
TTTCCGTCTTGACAGCGTCAGATAT	TEDH-1055771	OR51B4	AATGGCCAGTGAATGAATGA	GAGGCAAAATGTGTGCAAGA
GCAAGTATACTAATTGGTTGTGGTC	TEDH-1055772	OR51B4	GAGAAAATGGACATAGCTCA	GACTGGCTTCTTGGGCTCAG
GGATCTACGTATTAGGGTGGCGGAA	TEDH-1055769	OR51B4	ATTGGGTGAAACAGGCAGCA	ATTAAACGTGATATCAGCAC
AGAAATTGTAGACAGTTGGACCGAT	TEDH-1055800	OR51F1	ATACATTAGCCATCACTGAA	CTAATTGAATCACATCTGGA
GGCACAGCATCTACTGCAGTATGCT	TEDH-1055801	OR51F1	GCATGGTGTATCTATTCCAG	CCGACCATAGCGATACACCA
AGGGTGTATATAGGTGCATTTTGTC	TEDH-1055799	OR51F1	CTTGTGCCATTCTTCAGGGG	GCCTAGAGTCTGCCCATGTC
GCCCTAATCACTCGGGCTAGGGGTT	TEDH-1055816	OR51G2	GGATCAGAGCATAAGAGAAG	TCTGCTACCTTCCTGCTGAG
GCAGTCCGTCTGGCGTAGACGGGGG	TEDH-1055814	OR51G2	ACAGTAGCACAGAGGACTCG	AGAACTGGGGAGCCACAATA
GATACCCGACGCTAATTGGGCCTTT	TEDH-1055817	OR51G2	GAACTGGGGAGCCACAATAG	GAGAATGGAAACATAGTGCA
GCCGATCGAGCATATACCTTCGGAG	TEDH-1055823	OR51I1	TACATGGGCTGATGCAGAGC	GTAGAGGATGCAGAAAATCA
GTATTGGATGAGTCGAAGTCTAAGC	TEDH-1055819	OR51I1	AGCACAGTGACATAGCGTAA	GGCAGTCGTTTCACCACAAA
CAGGGGTCGGTTTGATGGTTTGTGG	TEDH-1055825	OR51I2	TCTTAATAAGAAAGGGAAGA	AGAACGCAGAATGAGCACAT
ATCCTACTGTTTGAGTGAGGCGTTA	TEDH-1055827	OR51I2	GATCCTGCAGGCTGTGCGAG	GCAGAAGGTTCGGAGTACAG
AAGCGTCTGTTGTCTTTTTTTGTTA	TEDH-1055828	OR51I2	GAGTGAGAGCTCTCCAGACC	GAGCACAGTTGCATAGCGCA
TTATTGACATAGAGTACAATCTTTC	TEDH-1055834	OR51M1	ATCACCTTCAATAATCTGTA	ATAATGACCGAATACCTCAG
TGTTCTTACGTTTCGGCCCTCAAGC	TEDH-1055837	OR51M1	GATTGGAAGGCATCAAACAC	CAATAATCTGTATGGACTGA
CGGGGGCTTGTGAGAGTAAATAGTA	TEDH-1055836	OR51M1	TGTTTGATGCCTTCCAATCC	CCACGTTGCCCACCACTATG
ACCGGTCCTGAACGATGACAGTCCA	TEDH-1055867	OR52A5	GGATTGCAAAGGCAACAAAT	AATATGAGTTAAGAACTGCT
ATGAAGCACAGCAACTCTCTCCCTA	TEDH-1055866	OR52A5	CACTGCACTGACTCCAGACC	AATATGGTCACGAATTTGCT
ACTCTTCACGCTTGGACGGCGAGGA	TEDH-1055865	OR52A5	ATCCGAGTCAACAAGATATA	GACAAGAGGATATGAATATA
CGTCGGTTATGTTCTGTCGTGCAGG	TEDH-1055872	OR52B2	ATGTGATAAGCCTCCAACCC	ATGAAGATTCATGAGCCCAG
TTGGCGACGTCATAGAACTGTAAGA	TEDH-1055871	OR52B2	CCATGACGGCCAGCATTGAG	GCAAACGAAACACTGCTCGG
TTCGTGTTGTGCGCAGGGAACCTCC	TEDH-1055873	OR52B2	AGTGTTTCGTTTGCCCTCCC	AGCACTGTTGTATATCTCAG
AGTTGATGTGGTCTTCAACTTCCTT	TEDH-1055878	OR52B4	CAAATGTGTTGAGAGCTTTG	ATGTGTTCACAAAAGGTGTG
TAACGCCACACCCTAAGCTGGGTCA	TEDH-1055875	OR52B4	GATAGCTAAGGCCTGAGGAA	AGAGGTACATGGGTTCATGG
AAACCAGGGGTGTTTATTCAATTAC	TEDH-1055877	OR52B4	CAGAAGATAGCTAAGGCCTG	TCTTCACAATCCTTACCCAG
ATTTCGTATATTTTAAGATTGGGGG	TEDH-1055882	OR52B6	ATATGTAGTTGCTCCAGCCC	TTCTCAAGATGCCCGCTCCA
CTGAGGAGGGGCATTCTTGTTTTTT	TEDH-1055881	OR52B6	TATGTAGTTGCTCCAGCCCA	TGCTCAAGGAGAAAGATGGA
CGGAAACCCATCTTCCGGTTATTGT	TEDH-1055879	OR52B6	GCGCAGGGACATAGAAGAGT	CTAAGGCCCTGGCCAATTTG
GGGCCCCGCCCTATTCAGTCCCGCG	TEDH-1055906	OR52H1	TGTGTCCAAAGCGATGGGCG	CCCACCTGCACTCAACCCCA
GACTGTGGAAAATAAATGGCTTGCA	TEDH-1055909	OR52H1	GCCTGGAGCAATTCCATGTG	ATGATGCGTGTCCTGCAGAA
GGTCGATCGCCAGCCGCGAGTCGCC	TEDH-1055910	OR52H1	GAAGGAAGAACATTTGTGTA	TAAACCATGGGGTTGAGTGC
CCAGGGGTACTCGCGGTCGTCTTAT	TEDH-1055914	OR52I1	CCTGAGAATTAAGATATAGG	GATACCCACAAGGAGGAAGG
CCCACGCCGCTCGGCGGGGATGCGG	TEDH-1055911	OR52I1	ATACATGGGCTCATGCCGAG	GATGGTGAGCATCTTCTGCT
ATACTAAGCACATGACGTGTGGCAC	TEDH-1055913	OR52I1	TCTCCACAGCTGTGGCTAAG	TGATTCATCATCCAACTCAG
GATTTACGCTGCCTTTAGGCGGATT	TEDH-1055930	OR52K1	CAGCCTGGATAATGAAGAGA	CATGGCCTTTGACCGCTATG
AAACAACCCCAATATCAGACAGTGC	TEDH-1055929	OR52K1	TGGAGTGTAGGTGGACAGGA	ATATATGATAGGATTGACCA
AATGAGTGATTACCGGAGAGCATGT	TEDH-1055928	OR52K1	AGCCTGGATAATGAAGAGAA	GCATGCAGGTGTTCCAAACC
GTTTACTTATCAGGTCATATTGCGA	TEDH-1055938	OR52L1	ATAGGCATGGCCTATGATGG	CATCCATGCATTCTCCTCCA
GGGCATGGCGAAAACTTATGACCGT	TEDH-1055937	OR52L1	ATTCTCCTCCATGGAGTCAG	TAACATTGCCCACTAAAGCA
TGTGGAGGATAAATGTTAGTTATGG	TEDH-1055940	OR52L1	GTGGGCATAGGAAACACCAA	GGATTGTGGAATGGTGCAAG
AACCGTGATCGGTGACGGAGTGCTG	TEDH-1055941	OR52M1	GATGGAGAGCCAGACGTGTA	GCACCATGCTATGACGTAGT
TTACTGTAATCAATATAAGACTTTG	TEDH-1055944	OR52M1	ACTCAACAGTGGCAAAGCAG	TCTGGCTCACTGGCATCCCA
GGTGGTTCTGATTCTGAAAGGCAGC	TEDH-1055942	OR52M1	CATGGTGCTCACTTATACAG	GATTGAGGATTGGAGGAATG
TAGGACTGTTGGACATATAGTGAGG	TEDH-1055962	OR52N5	TGATGTACATTGTGCAGAGT	AGTGTGGTAGCATAACGCAA
GGCACGTCGCATGTGGGGGGCGTGG	TEDH-1055963	OR52N5	GCAGAGTGCATTGGGTAGAG	GAGCTTGCCACCTTCCTGAG
TTGACTGATTAAGTGCTCAAGCCGG	TEDH-1055965	OR52N5	GTGTGGTAGCATAACGCAAA	CCACAATGATGTGAAGAGAA
TGGGTTTCGGCTAAGTAGCTCTCAA	TEDH-1055967	OR52R1	GGGACCATCGTGATGCTGAG	ACTCCACAGAAGAAAAGGCA
AGCGGCTACCAGCCGGGTTTTAGCG	TEDH-1055966	OR52R1	CAGCCCTCTCAGCATCACGA	ATACGTGGCACAGAACGGAA
CTTCTACTCCGGTGTAACATGGTCG	TEDH-1055970	OR52R1	CAGTTTGATCACGACCGATG	CAACATCTTAGGTTGAGTGG
GGGGAAACGGTATGACTCCCGTTGT	TEDH-1055978	OR56A1	GTGGCTGGTTGGACCTTGCT	GGTTGTGGTGTTGACAAACG
GAAAAATCGTTGTATTCTTTTATTT	TEDH-1055976	OR56A1	ATTGATTAGTGATGATGGAT	GGCCAGAAAGAAGGTCCCCA
GCATGTCGAGCGGCGCGGGTGGAGA	TEDH-1055977	OR56A1	GAGCCTGGACACAGACAAGT	GCACGATGTCCAGCAGGGAG
AGTTCACGAATGTTAGTGCCCGGAT	TEDH-1055981	OR56A3	AATTCATGATGTACATCTGG	ATGATTGATGGATATCTCAG
TTCCGCCGTCGTTGTATTTTAACAA	TEDH-1055983	OR56A3	GCACGATGTCCAGCAGGGAG	CAGCCAGATGGTCATCAGGA
CATGGGGTTCGTTTACTTTAAGGTC	TEDH-1055985	OR56A3	GGAGTTGTGCTGAAAGGATG	CTGCCTCACTGTCATCCCCA
GAAGGGGGTCGAGTAATCCGGGCTG	TEDH-1055999	OR56B1	CTGTAGGGTTGAGGGAAGGG	GTCTGGTATCCTACTCTGCA
TCGAACTTGAGGTTTTTGTACTGGC	TEDH-1055998	OR56B1	TGTTGCCAGCTGTGAATGCC	CAGTTGGTTCTGGCATGGCT
AGGGTGAAATTGGGACGGGGGTCTA	TEDH-1056000	OR56B1	TATCAAAAGCCATGCAGAGT	TAAACTGTAGGGTTGAGGGA
ATGCGGTTCTTTAATCACGCAGGGA	TEDH-1056011	OR5A2	ACTAAGGAATCCACCCACAT	TCATTGTAAACATTAGCCCA
CCCGCACTACGATGCAGTACGCAAG	TEDH-1056014	OR5A2	GTGAGAGTCCATCTTAATGA	GATGTCAGACAGCATCTTAG
CGGTTCATCCAGCTTGTTGGGTCCC	TEDH-1056012	OR5A2	GTCCACCGTGAGAAATCCCG	CCATCTTAATGAGGGCAATG
CCGGCTTGATCAGGATTAGGGGCTC	TEDH-1056022	OR5AK2	AATGGTGACTGCGGTCAGGT	GGTAGCTGGTTCATACATCA
GCAGGTGTGATAAACTCAAAGTGGC	TEDH-1056021	OR5AK2	GTCTGCATCCGTTTGGTAGC	GGATACACCAAAACTCATGC
ATGTCGCTGTAAACGATTGATGCTA	TEDH-1056023	OR5AK2	GATACACCAAAACTCATGCT	ATAAATGCCTCTGTACAAAC
TGAGCTGATGTCTACAGGGGGGGGC	TEDH-1056025	OR5AN1	ACAGAGGGTGGGTGACATGA	GTTACTGAGGAAGAAATACA
GCCAAACAGTTGTAGCTCAGAATAC	TEDH-1056029	OR5AN1	CCAGTACCATCCAAACACAG	CTAGTTATCATGATATCCTA
GAAAGCGTCTAGGGTAGGTAGGAAG	TEDH-1056028	OR5AN1	CAGTACCATCCAAACACAGA	CCATCCTTATTAAAACAATG
CGAAGAAATTTGTAGGCTGGTGTAG	TEDH-1056030	OR5AP2	AAAAGTCATCCCTGTATGTA	TCCGACAATCCAGATCTACA
TGTATTGGTGACTAGGGAATATATC	TEDH-1056032	OR5AP2	CTACTCAATGGAGCAAGACA	AAGAGGCATCTACAAAAGAG
GTTACTAGTTTCTGCCCTTCGTTTG	TEDH-1056033	OR5AP2	GATCCTATTAGAACCACAAA	TCAACAGAAACAATGCAAAG
ACACGTGTTTTGGAGTGCGCGAGAA	TEDH-1056036	OR5AR1	CATTAACCAGGTAAACTATG	ATCTTGCTCTTCAGTCTGTG
GTCTGACATAAGTTTTTGCTTTCAG	TEDH-1056038	OR5AR1	ACTCCCTGGACCAAGACAAG	GTAGGTGTCTGAGCAAGAGA
ATACTAGGATGGTGCTCTGGGGGCT	TEDH-1056035	OR5AR1	AGATAACTTTGTGATTTGTT	GATGGAGATCATCTTCTTCG
ACATGGCTGGGCAGCTACTCGTGGG	TEDH-1056071	OR5B3	GCCGACTGCAATGAAATGAG	AGGCATTCAGGAAACCACAG
GCGTTTGGTCCGTTCTTTCTGGTCT	TEDH-1056072	OR5B3	AAATGTGTCCCCAGTGTGGA	ATAGACCAGAGGGTTCAGCA
ACTGGGCAACGTAGTTGGATGCGGC	TEDH-1056073	OR5B3	AAGGGGAACGTTATAAAGAG	GAATGCCTCCATCCACACTG
CTTCGTGGAGAACATGGATGAATTA	TEDH-1056104	OR5F1	GAAGAGAACGTAGGAGTAGG	GATTTATACACTTACAGTAC
GCTTAATCTCGATTAGATATCTTTC	TEDH-1056100	OR5F1	GGCTTCTGTGTTCTACACAG	TAACCCAAAGAGGATGCATT
AGTCGCTTTGTAGTGCACAAAACAA	TEDH-1056103	OR5F1	ACAACCGAATGCATCCTCTT	TGAGTTACAAACGTCCACAA
CTGGTCAATGAGTGTCTCCAGGGTG	TEDH-1056163	OR5L1	ATCTCCACTATTGCCTGAAC	GGTGAGAATTAGCAGGTAGG
AACTGTAGAAGACGAGAGGTGGACG	TEDH-1056160	OR5L1	CTACAGAGGACAAGTGGCTG	CAGGGACATCTGATAGTCCA
TTCACATTTAAGTGAGACCCTAGTT	TEDH-1056161	OR5L1	CATCTCCTTCCTAGGGTGCA	CACGACTGTGTAGAACACGG
AATCGGTGGTTATTTATTCTGTGAT	TEDH-1056168	OR5L2	CCCACAGAAGTAGCAGCAAG	GAATTAGCAGGTAGGAGGTG
ATTCGCGACGCTCATCGGTGCTGGA	TEDH-1056166	OR5L2	CATCTCCTTCCTAGGGTGCA	ACAGCCATCACTGTCTCCCA
AATCAGCCGGTACGTTTGTTCGCGC	TEDH-1056165	OR5L2	TCTCCACTGTTGCCTGAACT	CAGGGACATCTGATAGTCCA
GGGTTCGGCTCAATGGTGGCAGTGG	TEDH-1056176	OR5M10	ATACATGGGTGTTTGCAGTT	GTAAAACTCAGTGATCACTA
AACGGGGGGTTTCATCTCCAGTGGT	TEDH-1056179	OR5M10	GGCGATCTACCTAATCACAC	GTCACTGTGCCTTACATGTA
ATGCGAAGAAAGCCCGTTAGCGTCA	TEDH-1056177	OR5M10	CAGGCCAGCATGATAAGAGG	AGCAAATGTCTACAAAGGAG
ATCACGCTATATTATTTTGATCTGT	TEDH-1056195	OR5M9	TGTCTAGGACTGTGTGTGTT	CGTAGAGCAGGGCAAAATGG
GATGTATGGCTGTTTGTGATAGGTG	TEDH-1056197	OR5M9	CAATGAGAGTGTAGGAGATG	CTCTCATCCAGATTGCCTGT
TGGAAATTGGAGAGATTAGGGTGTC	TEDH-1056198	OR5M9	CTGCACCAAGCATCCCACAT	ACAGGCAATCTGGATGAGAG
TGGGTTGTGAGTTGACTGGGTGATA	TEDH-1056211	OR5R1	TTATTATTGCCGCTATCCTA	GTCACTGTATTCATTCTGAA
TCGTCGGATGCGGGGGTTGGGCAGG	TEDH-1056212	OR5R1	GAAACACTCAGTGATCATGA	AGAGCGGATCCTTAGGATAG
CGATATCAAGGGCCGCAACAATTCG	TEDH-1056214	OR5R1	ACCAGGAAGCTGTATATATA	GGCAATAATAAAGATGTAGG
AATACTTGTGGGGGTCTATTTTGTG	TEDH-1056219	OR5T1	AAAGACATGCCTAATTTCAT	ATTCAGCATGGGAATCACAA
CTACGTGGCCGGATCGCTTCGTGTG	TEDH-1056215	OR5T1	GTAGATGATGGGATTCAGCA	ACATAGGAAGCAGTGATGAG
TGCCGGGCTTTTGCTAAGTATAAAT	TEDH-1056216	OR5T1	TTTGCGGAACAAAGATGTAA	GAACAAGAAATAGCAAGCAG
TATGTGCGACCGTAGGGGGTGCGAT	TEDH-1056242	OR6B1	CATGTTTCTGATATTCCTTG	TTGAAGGCATGGATAACTCG
TAGTTAGATTTGCACGCCGTGTCAT	TEDH-1056241	OR6B1	TCATTCTGGTGGGATTCCCT	GATGAAGTAGATCTTCGCCA
CAAAATCTGGGTTCCTATGGTTAAA	TEDH-1056244	OR6B1	GTGCAGGAGAGATTAAGTAC	TTATTGCCTAAGAAACCGAG
AGAGGCCTTGCCAAGACGGTGAGCG	TEDH-1056248	OR6B2	GTAGCGGTCGTAGGCCATGG	TGGGCCTCCCCACGGCCCCA
AGGGGGTTATCGACATTATAATCGT	TEDH-1056245	OR6B2	GGTAGGTGAGCAGGAAGAGG	CGTGCAGGCCAGCTTGAGGA
GGGATACTGAGGTTGGCGGGAGTCA	TEDH-1056249	OR6B2	CATGGCCTACGACCGCTACG	CATCCTGGTGGGCCTCCCCA
GTGTTTGATTATGAACCGTTATTTG	TEDH-1056270	OR6C4	AGTGTTCTGCTCCTGGTTGG	GGATGACCATCAGTTCTAAG
TGTGTGCTAGTGGCGTGTCTGGGTA	TEDH-1056274	OR6C4	TAGTGTTCTGCTCCTGGTTG	ATAACGATCATAAGACATGG
GACTCCATTCTGTTGGCCTAATGGG	TEDH-1056271	OR6C4	CTAGTGTTCTGCTCCTGGTT	AATCCTTCTGCAAAAGAAGG
GTAAGCTTGTCAGAGAAGTTCTTCG	TEDH-1056275	OR6C6	AGAAATGAAGAACAAATCAA	AGCTTGAGTCCCATGACCAA
CTAGGCTCGCTTGTGGATATTTCAA	TEDH-1056277	OR6C6	GGTGACACTTGTGGTCACAC	GCTTGAGTCCCATGACCAAT
ACTTGAAGCAAGAAATCTGTTTGTG	TEDH-1056278	OR6C6	CTTGAGCCGGGGATCCAGCA	ATAATGATTGGATAATGCAG
GTGTCTTAAAGGGTGTCCTGTCAAC	TEDH-1056285	OR6C68	AATGGTTATTTGTTGTTGGA	ATTCTTTCATATATACTCTT
GTGCCTACACATACTACTAGAGTGG	TEDH-1056289	OR6C68	GTATAAGAATCTTGGAACAC	AATAAAGGTTAATACAGCAG
ACGTGGCTGTATTGAGGGGCATTTT	TEDH-1056298	OR6C74	CTTGAGATGCAAATCCAGTA	CATGATGGTGGTGTAATGCA
TGGCAGCTAGTTGCCGGGCGGGCGC	TEDH-1056295	OR6C74	AAAGAGTGTCATTAAATAAA	GTCTTTGCTTCATGGATGGC
TAGTTAAAGCTCGTTCGCGTCGTGA	TEDH-1056299	OR6C74	GCTTGCTGGTCTTTGCTTCA	TACATGTTCTTCCCACATGG
CATGCGGTCTTTAACTTTCGTTTCC	TEDH-1056316	OR6K2	TCAGTTGGGTACATAGCTTG	GGAGAAGATAAACTCCTGAA
AACGAAGTACAGATGAGGGTAGAGG	TEDH-1056317	OR6K2	ATCCAGGCAATCTCAGGAAG	ATGATAGAGGGATAATGAAG
GGATTTGTCCGCTCCTATGTTTACA	TEDH-1056318	OR6K2	TGATAGAGGGATAATGAAGA	CCATTCCACCGGCATCTGTG
ACTAGGTGGGGGGTCGGAGTGTGGT	TEDH-1056320	OR6K3	AAGATCTGATGGATTTGGTT	GACAATTCTTACATAGGACA
GGGGCGCACGGTGTGGATGGGTGAC	TEDH-1056322	OR6K3	TACAGTAAACATCAGTGCAA	GAGTTGAGCACAGAGCCGGG
GTCTTGGTGCATCGCTGCGGTAGTC	TEDH-1056323	OR6K3	CAACCTCATCAGTGAAAAGA	CCACTCACTTGAAAACTCAG
AGAAGGGCAAGGACATGGGGTGGGT	TEDH-1056325	OR6K6	GTTTGGGAATCATGATGGTT	ATGTTCCCGCATGCGCACAG
GAGGAGGTCACGTTCTCGATGACAA	TEDH-1056327	OR6K6	TTTCTGTGATACCAAGTGAG	AAATCCGTAGATGAGAAGCA
GACGGAGGGGTGAGCTCCACCTAAA	TEDH-1056329	OR6K6	AATGTTCATTGTCATCCAGG	TGAGCAGAAGAGCATTTCCG
TGGGAACATCTATGCACTGCCGGTT	TEDH-1056344	OR6N2	TGGTCATAATTATAGGGTAG	ATTCAGACGCTCCCAAGGAG
CATAGTGTAACAAGGCGCAGAGGTG	TEDH-1056341	OR6N2	GTAAGCACAAAATGGGAGCT	GCATCATCTTCATGTATGTG
TGTTGCCGAATTGCTCCGGTTTCAT	TEDH-1056340	OR6N2	TGTCAGTGTTCTTTCCTTCT	CATCTTGGCACAGAGTGTGG
TTTCAGGGAAATTAGGAATGACTTC	TEDH-1056369	OR6V1	AGAAGATAAAGCATGAGGAA	AGAGGGGATCCGCAGCACAG
TCCGTCTGTTCTGTCCTTATACGTT	TEDH-1056366	OR6V1	GAGAAGATAAAGCATGAGGA	GGTTACCAAGATCTCCAGCA
GAATTGGTGTGTGAAGGTAGGCACC	TEDH-1056368	OR6V1	GTCTGTCAGGATGAGGAAGG	GTGAAGGTAATGACTTTGTG
AGAAATGGGATTTTGACGTGGCTCA	TEDH-1056370	OR6X1	TTAAAGGAGGAGTGTGCTGT	CCTGGGCTCAGCCCACACAG
CTGGGTTTTGTCATATCCGCCTCAA	TEDH-1056373	OR6X1	GGATAACAGGAAAGCCTAGC	AGTTGTCTCCCTGCTCTACG
CCTGTATTCGGGCCAAAGACAGAAC	TEDH-1056374	OR6X1	CAGAACAGCCCCGTAGAGCA	GGCCTTCTTCCACTTCTTCG
TCAACGAAGGTTTCAAAGATGATTG	TEDH-1056390	OR7A5	TTGTTGTGGGGAACAATGAA	AGTAACACAAATGTCAGCAA
GCGCGGGGTCAGCGCTCACAGGCAT	TEDH-1056393	OR7A5	AAAGACATAAAGAGGGCTCT	GACCACAGTGTACATCACTG
ACCTAGGTAACTCCGGGAATTATGC	TEDH-1056392	OR7A5	TAGGATTGCACCATAAAATA	GAGGAATAAAGACATAAAGA
GGATGTCAGGTGCGAGTTTATACAT	TEDH-1056411	OR7D4	CTGTGGATCTCACCTCTGTG	GACCATGGCGTACATCACTG
ATTACGCTGCTCTTGGTTTTTTCTA	TEDH-1056414	OR7D4	CAATAACATTGTCTTGTATG	GGAGGAGACAATCTGAGAGT
CGGTGGTAGGGCCAATAACGAGAGC	TEDH-1056410	OR7D4	TGCTAGTGAGCATCCAGGCA	ACCAAGATGCCAGAACCAGG
GGGGGAAACACATAGTATCATGTCA	TEDH-1056433	OR7G3	AAATGAGTGGGTTCAGCATG	TCTTTCTCTTGGGATTGTCA
TTTTTTGGAAAGGGAGTTCGGGAGG	TEDH-1056434	OR7G3	GTAAATGAGTGGGTTCAGCA	GAGAAAATGATCCCAGAGAG
CGTTTTTTGGAACTGCACTATTGGG	TEDH-1056431	OR7G3	CTTTCTCTTGGGATTGTCAG	AGCATCAGTGATGTATACCG
GTTAACAACGCTATCCTTATGCTAG	TEDH-1056451	OR8B3	GAGCATAGAACAGACCTGAT	CAAGCCAAGGTTGCCTACCA
CTCTATGCGGGACGGGTGGTATTGC	TEDH-1056453	OR8B3	AATAGTACATTGGTGTGTGG	GCTGGAGCCACGGCCCACAC
TTGGGTGTATTGGAGCGGCCGGGCT	TEDH-1056452	OR8B3	CGAAAAGAATGATCAAGCCA	CATCTACAGTTTGAGGAACA
CGTGAGTGCAATTGTTAGAACTACG	TEDH-1056463	OR8B8	GATAAACTGTGTCACGAAGG	CACCACAGTGGTATAGAATA
GATGTTTTAACTCGTCCATGTCAGT	TEDH-1056460	OR8B8	CTAAAAGAGAAAAGGGTTTG	AATGGCGTATGACCGCTATG
AACATACTGCAATTGCCTAACACGT	TEDH-1056462	OR8B8	CATCTTCCACATTGATTCCA	CACCCATCATGCACGCTGTG
ACGTGAGGCATCAATTCAGGCCTGG	TEDH-1056472	OR8D2	CTGTGACCACATATATTCCA	GGCTTTGGATTGCCCCTCAG
AGTGGAGGTTTTATGTCTGTTAATC	TEDH-1056473	OR8D2	AAATGAAAGCATAAGAGATA	AGCTCCCATCTCTTGGCTGT
GGGGGGCGAACGGCGGGGTAGGCGG	TEDH-1056471	OR8D2	GATGCCCACAGCCAAGAGAT	TGAAGAAGATGACTAGGGGA
GACTGGGATTGGTAGTGCCGTATGG	TEDH-1056484	OR8G1	AGGAATCTATGTGGTCACAG	GCCATCTTCAATCAGCTCCA
CCTGAGGTTTACCTCTAATTAAGAC	TEDH-1056480	OR8G1	TGCTGAGGAAATAGTACATA	CAATCAGCTCCATGGACCAG
AGTCATGTTATTCGTAAGCATTATG	TEDH-1056481	OR8G1	TCAATCAGCTCCATGGACCA	CATCTTAGGGGTAATGACAG
AAGCCCGATGCACTATATAGAGGTC	TEDH-1056487	OR8G2	AGCAGGAGAGCCCCAAGAGA	GCCATCATCTGTCAGCTCCA
CCGTCAGTACGACGGTCGTTTGTTA	TEDH-1056488	OR8G2	CCTCCGTAGAAACTGACCAA	CCTGTTCTTAGGAATCTATG
TTTTTGTTCTTCTTTATCTCCCAGT	TEDH-1056485	OR8G2	CCACTGCTTCTGGCTCACAG	TCTGTCAGCTCCATGGACCA
GCAAGCTTTCATTCGTGATCCCCCG	TEDH-1056494	OR8G5	TGATGATGCTGTACAGCAAG	AACAATAGTATAAAACACAG
ATATTTTTTTTGGTAGGATAGACGC	TEDH-1056491	OR8G5	AACAGTACATAGGTGTGTGC	TATGATGATGCTGTACAGCA
GGTCGACCTCGGTATGTCGAGTCGG	TEDH-1056493	OR8G5	AATGGCATATGACGGCTACG	GCCATCATCTGTCAGCTCCA
AGTAGTCGTTCAGGGAGGCCCGTCA	TEDH-1056520	OR8J3	GGCTCCTGAAAATTTCACCA	ACCACCACCATGTAGAGCAG
CGGTTGGGTAGTATAACCTTCTATT	TEDH-1056522	OR8J3	CTAAGGATACGTTCACCAGA	GATGGCCTATGACCGCTATG
AAGTTTTAGCGACTTTCACAATATA	TEDH-1056523	OR8J3	GGATACGTTCACCAGAAGGA	TATCCAGTGAGTGGTTGGTT
GCGCTAGTCGTGTGCTGGGCCTTTG	TEDH-1056534	OR8K3	AATATGCCCTACGAAGGACA	TCTTGGTTATTCAACAACTG
CCTTTCCTTGTTCGTTGCAATTCTG	TEDH-1056532	OR8K3	ACACAGTAATCATGTCACGA	AACAAAGCAAAGGTAACAAA
CTAGGGTGAACTATACACTTGTGAT	TEDH-1056533	OR8K3	TCATCCTGAGAATGGCTACA	CACAGTAATCATGTCACGAA
AGACGTATAAGGTCTTAGGATAGCG	TEDH-1056547	OR8U1	CCTGAGGATGCATTCAGCTG	ATAGATTAAGGGATTCAACA
GTGTTCGTGCAATAGTGTGCAGGGG	TEDH-1056545	OR8U1	TCAACTCCTGATGGTCTGTG	CATGGCCTATGACCGATATG
TGATGCAGGTATACGGTGTAGTGGC	TEDH-1056548	OR8U1	TGCCCTGGACACAGACAAGA	CAAGGATTCTGATATCATGA
GCCGTCGTTAGACCCGGCCTCGCAA	TEDH-1056566	OR9G1	AATGCAGCTGGGCCTCTTCG	CGTGGCTTATGACCGCTACG
ACTCGTGGTACGCTGTAGGTGAGTA	TEDH-1056569	OR9G1	TGTATGATTGCTCCTCTGCA	GCCATAGTATAAAGTGACAG
GCGGCTGTATACTAATTTATCCGCT	TEDH-1056567	OR9G1	GTCAGTTCTTCTTCTCTGCA	GGGCGTGTACTCTCTCACTG
AATATGAGTTCAGGTGCGCCTACGG	TEDH-1056580	OR9I1	AAAAGAACTGGGCAGCACAG	TGTAGAGTTTGACATCTACT
GTTGTGACGGAGGAGGGTTTGACGC	TEDH-1056582	OR9I1	ATAGGAAATCAGGATGACGG	ACTGCAGGCAAGCTTCAGCA
TTTTGCACGCAGCGACTTTTTAGTA	TEDH-1056584	OR9I1	GGTGCAAGTGGTACGCAGGA	CAACCCACTGCTCTATACCG
AGGCGGAAGCATTGGGGTAGTTATT	TEDH-1056629	ORC2	AATGGAATCTTGCAGCATAG	GAAGCCTTACCCCTAATGCA
GAATTCCTATAATTAAAGTTTGGGT	TEDH-1056627	ORC2	CTTAAAAGATCAGAACTATG	ATATTCTGCTTCCAACTCAG
GCTGTCTTGTACTAGTAGGCTTGGT	TEDH-1056625	ORC2	TTTGCGTAACTTATTGAGCA	CTAGCTGATCCAGTATACTG
CGCAATCGTTACCGGGCATCATGGG	TEDH-1056626	ORC2	GCCATTGATGACAACGTGAA	ACATGAGTAAGGGAGCTAAG
ACTTCTTTGCTATTGAGCCCTAGTT	TEDH-1056881	OTUB1	GTAGACCACAAGGTAGTCGG	AATTGAGGATTTCCACAACA
AGTCTATGCGTGTTGAAATGAGTAA	TEDH-1056879	OTUB1	GAGCACCTCCGACTACCTTG	GAGCCCTCAGGGAAGATGTG
CCTGCGATACGCGTTGCACGGGCGT	TEDH-1056883	OTUB1	AGAACCCTCTGGTGTCAGAG	CCTTCGGAGTCGCTGCCCAG
CTTGGCTGTAATAAGAGGTGACGGT	TEDH-1056887	OTUB2	AGTGCCGGAAGAAGTCTGCT	ATAGAGCAGGTAAACGGAAG
GGGGTCATGTAACCCGCTCGAACAG	TEDH-1056885	OTUB2	GGATGGGAACTGCTTCTACA	GATTTACCGGAGGAAAATCG
GACTATGGTAAGTTGTTGGGGTCTT	TEDH-1056884	OTUB2	CCAGCAGCCAGAAGGTCATT	GGCCTTGGGCTATTCCTACC
GAAGCTGTGTTTAAGCGGCTGTTTG	TEDH-1056924	OTUD7B	GTGACGGTGACCCATCTTCA	GGTATTCTCCTTCTGCTCCA
GTGTTTGCTTGTGTATTTTATCCCG	TEDH-1056928	OTUD7B	TAGGAATCAGCCACTCGGTA	AGGCGAGCACCAGAGGGGAG
GTATAAGTTAAAATAGTATGGAGCC	TEDH-1056925	OTUD7B	GACACAGCAGAATAAAGAGG	GAGGGATAGTAAAGTCCCCA
GGGGTCTTGTTGATGTCTCCATTCT	TEDH-1057354	PAGR1	CCCCGCCCTCCGAAATCCAG	CCGACAGCACCTTGTCCAGG
TAACGTGGGATTCCGGCGCAAGCCT	TEDH-1057357	PAGR1	ACCGAGCGTGAGGGGTCCGG	ATAGAGCCGCTGGATTTCGG
CTGTACTTATCCTTATACTTACATT	TEDH-1057356	PAGR1	AGGGAAGAGACTACTCCCGG	TACTGGCCGCAGTGTCTCCA
CTGGTCATGAATTGAATAGTCGCAA	TEDH-1057353	PAGR1	CCGCTGGATTTCGGAGGGCG	AGACACTGCGGCCAGTACGG
AAGAAATGTCGATACGTTATTCCCC	TEDH-1057384	PAK1	GATGCTGGAACCCTAAACCA	AATTGCAGCTGTGTGCCGTG
GATATAAATATTTATTTCAAAAGAT	TEDH-1057385	PAK1	GGATGTGGCCACAGGACAGG	GCTGGTATTTCTCATCGGAG
TACCCTAATCGGCCAGTGGTCGCAG	TEDH-1057383	PAK1	CTGGTAACACTCACTCTCAG	AATATTCTGTTGGGAATGGA
AGGGGTGCTGGAAGTGGTTTTATCA	TEDH-1057422	PALB2	ATCCTCCTGGGCCATCTCCA	CCCTAAGACGACTCTCAGCG
AGCATGAGTCGCTTGGGATGGTTGT	TEDH-1057420	PALB2	TCGCAAGCAGTTATGATACA	GGAACTGAGTCCTAAACGCA
ATAGTTTGGATTTATTTGGTGCACA	TEDH-1057419	PALB2	ATTATCTTCAGTGGGCCCAG	TCTACGGAACAGGAACCTGA
TGCGATGCTTTCAGGGTCCGTGCCC	TEDH-1057537	PAPD7	GGAGCAACCCCTAGGGTCGG	AGGTGGATCAAAGAGAAGTG
GAAAAATTGCTTCTACCAGGCGTTA	TEDH-1057538	PAPD7	GCGAATAGCCACATGCAATG	ACCGCCTTGCCAATGCCCAG
TTTGAGCCAGTGGAATGTATAAAAT	TEDH-1057541	PAPD7	GCCACTGGGCATTGGCAAGG	TCTACACCAGCTTGTCTGCA
ACCCTATAACGAAGGTATGTCTTCC	TEDH-1057539	PAPD7	CAGACTGAACTGGTAAACAC	TGGCCAGCGGTGACACAGCA
GATGGTCTGTGTGGGGCCTACCCGC	TEDH-1057540	PAPD7	CACCACCAGTATAACCGCAC	GGAGGTGGATCAAAGAGAAG
AGGTTCGAATTTACGACACTCTGTG	TEDH-1057648	PARG	TGCAGAAACTGTTCCACCCC	CATCAATTCTGAGTCCCCAA
GCATTCATCAAGGATCATCCGCTCT	TEDH-1057647	PARG	ACCTTTCACTCCCATCTTCG	TCTCAGGCACAAACTGATCG
ATTTGGGTCAGAGGGGGGTGGATTA	TEDH-1057649	PARG	CAGTCTGAATGAGCTCCCAC	AGAACAAAATTTGTACCCAG
GTTGGTTCTCAAGTCTAGCATGGAC	TEDH-1057650	PARG	AAGAATGGTGAGCGAACTGC	TCGACAGCATGGTATATGAA
CCATGAACCGGCTGGGTATACGCCC	TEDH-1057652	PARK2	ATGCTAGACTTACCCACACA	TACTGATGTTTCCTTGTCAG
TCCGTACACAATGAGTCGGAGAATC	TEDH-1057654	PARK2	GCACCACTCGAGCCTGCACT	AGACTTACCCACACAAGGCA
TTACAGGGATGTTATCGGGCTTACT	TEDH-1057651	PARK2	AGTCTAAGCAAATCACGTGG	TTCTTTACATTCCCGGCAGA
GGAACAAATTTGTTGTTACTTTATT	TEDH-1057656	PARK7	CATCACGGCTACACTGTACT	GTAGATGTCATGAGGCGAGC
GTTCATGGGACAGTAGCGTTCACAC	TEDH-1057658	PARK7	TAGATGTCATGAGGCGAGCT	GAAGGAGCAGGAAAACCGGA
GCGTTGCCGATATTTAACTGGAGGA	TEDH-1057657	PARK7	GATGTGGTGGTTCTACCAGG	CTCGCCTCATGACATCTACA
CCGTGTGTGCAACCGGTGAACGTGG	TEDH-1057680	PARP1	ATGAAATTAACTCTTAAAGG	GCTTCTTCATCCCAAAGTCG
TTAAGGATGATTCTTTTTCCTCAGT	TEDH-1057679	PARP1	GCCATGATTGAGAAACTCGG	CTGGCCATAGTCAATCTCCA
CAAATCCGTAGCGGCTTGGTGCTAG	TEDH-1057678	PARP1	ATGCAGCGAGAGCATCCCCA	CATATCAGCAAGTTACCCAA
GCTCTATTGCCATACGTTGCTTGAG	TEDH-1057677	PARP1	GATGAAATCCCGGTCCCAAG	TCTGCATTGTTCAGGAGCGG
TCTGTTCAATGAATTGCCATGAACG	TEDH-1057698	PARP14	TCTTCTCAGATACATCCACA	AATCTTAGCAGGGAAATCAG
TACTGGTTCATCTTTTCCTTGACCG	TEDH-1057697	PARP14	ATACACTGCCACAGACACAA	TTCACACTCCTGCAAAACAG
GCTTAGAGGCGGATTCGTTTGACCC	TEDH-1057702	PARP15	TTCTAGAAGAGTGTGAACAG	GTGCCATATGTCAATCAGCA
TGCGTAGAATTTTACAATCTTGTCA	TEDH-1057705	PARP15	CCAGGTAAAGAAAAGGCAAA	CACTGAGTCAAAGAGATCTG
CGGTGTGTTACTCGTGCGTACGTCT	TEDH-1057703	PARP15	GAAAGTTCAGTGATGCAGAG	TTATTGTAAACTCAACAGCA
CGTCCGAATACAAATCTAGGTACGA	TEDH-1057701	PARP15	TGAACAGAGGAAGTACACAT	TACTCCAAGCCAGACAGCAA
CTTCCGTCGACGAATACAGAATTCT	TEDH-1057714	PARP2	AGCTCCCATCACAGGTTACA	TCAAGGTAAACATAGCACCA
CTAGTGCGGCACGCGATAGGCTCGT	TEDH-1057712	PARP2	CATGGTATAGTCGCTGTGTG	TCCACTAATCCGGACACAGA
GCCCGGGTCGCTCTTAACGCAGCGT	TEDH-1057711	PARP2	AAATGTGAAGTCCTACCAAG	TATTAGAAGATGATGCCCAG
CAATTTCGTAGCGAGGAGGGCTATG	TEDH-1057713	PARP2	AATATATTCATTGTAGTTGA	AGCTTTGCCCTTTAACAGCA
TCACGGAAAATACTGGACCCGCAGC	TEDH-1057715	PARP2	TTCAGTGTTTGGATGAGATG	GATTGCCTGAACAAGCCACC
ACGGTATCTTTCTCCTTTGCCGAAT	TEDH-1057720	PARP3	CCAACACGCCCACCAGAATG	CAGCAAGTGGTGGTGCCCCA
TGGATAGTTGGCCACCGGGCTTCTG	TEDH-1057718	PARP3	GAGCGAGTACCTCATCTACC	GATATGGTGCTCTCTGCCCA
ATGTCTGTCGATATTTCTTGACTTC	TEDH-1057719	PARP3	TGCTTGCTCAGCTTTCCCAG	GAGCCCACTAGTGAGGATGG
TTTCCTAGGTCCATAGAGATTTTGC	TEDH-1057716	PARP3	CCAAGAACAACTGGGCAGAG	GTTAGTGATGAGCTTCTGCG
ATTAGGCGCTGAGCGGGGCAGCGAG	TEDH-1057723	PARP4	ATATCTGCAAGACATCCACT	TCTTGACTGCTCCAGTTCCA
CTTCGTACGTCTGAGGTTGGCGAAA	TEDH-1057722	PARP4	CAAAGCTGTCATTAGCACCA	GATCTGTTGAAAGGTGAGCA
GACCTAAGAGGGCCCACCACATCCG	TEDH-1057739	PARP9	TAGCTGTCACGGGAGCAGGG	CCACTTGCGAATCCCCTCCA
GTGACTTTACGCTAGTATACCCAGG	TEDH-1057737	PARP9	GTCTTTGTACACAAATTCAG	TTACCGTCTGCCATTCAATG
AGCTTTAGAAGTCTCTATATCAGTG	TEDH-1057738	PARP9	CAATCTGATGGGATTCAACG	TTATCCCATTCCATCCACCG
TGTGAGTTAGATATGGTAAGGTATT	TEDH-1057740	PARP9	AGATAGCTGTCACGGGAGCA	AATATATATACCATGTACTG
AATTTTCTTTTAAATATTGCCTTGG	TEDH-1057745	PARPBP	TATCGAATTATTCACCTGTG	ATTAGAACAATAGAGCTTGG
AAATCAAAACTATCTGGGAAACTTG	TEDH-1057743	PARPBP	AATAAGGTCAATTACCAGAA	AAATCTCATGCCATAAACCA
TGACGTTGGAGGGGGACAATGTGTA	TEDH-1057866	PAXIP1	GATTGTTCCAGAGCCAAAGG	TCGCACCGTGAAGTTCCTGA
TATCCTTTAGTCTGTCTCAGTTGTA	TEDH-1057867	PAXIP1	AATCGCCGTCAGGAACTTCA	GATTCAGTATAGTCGCTACA
ATGTAACAAGTTTACTTTCCAGTTC	TEDH-1057891	PBRM1	TGTATGCTTGGCGAATGTTG	CGTCTATGTGGAACCTGCAG
GAGCCAGGGATTCACGACGTCCACT	TEDH-1057894	PBRM1	CCCGGAGCATCAAATCTCGA	TCCTGTTCAGCAGTGAGATG
CTACGGCAAGCGCGGCGATAGGCCC	TEDH-1057893	PBRM1	AATGCAGCAGAAACTAAATG	AGCTCCATTACAATGACATG
GACGGCAGGCTGACGGACGGTTGGT	TEDH-1057890	PBRM1	TGTTGGAGATTACGTCTATG	CCAGCGGCTTCTTCACTCAG
TGGGGTCAAGCATCTACTTGGCCAG	TEDH-1057892	PBRM1	ATCTCAAGACCATTGCCCAG	CTTTCAATACAGACGATATG
ATAGTGAGAACGCACTGGAGGAAGA	TEDH-1058276	PCID2	GTATCACCTGATGCAGTTTG	GTTAATGGTAATGTGCGCCA
TTAGCGAGGGCCTTGTTACGTCTAG	TEDH-1058279	PCID2	CGTGTACTTTCAACACACCG	GATTCCGCAGCGAATGAAGA
GGATTCTTTACGTAAACGATGAATT	TEDH-1058277	PCID2	GAAAAGCATCCAGAGACAGC	TCTGGCTAACTTGATATACA
GGCGGTCATGCCTGGCGTCTTTGGC	TEDH-1058280	PCID2	CCAGGTGCACTTATGCAGTG	AATGCTCAAAGGCAAATGAC
CTAAAAGCTCAGCAAATTCCATCCG	TEDH-1058278	PCID2	CAACACACCGTGGACAGGGG	AGAACGGTGACAATGCTCAA
TCTATTGGGGAACACCTGTCTACAC	TEDH-1058323	PCNA	GTCGAAGCCCTCAGACCGCA	ATGAAGATATCATTACACTA
GCAGGGTTGAGTGCTGACACACTTG	TEDH-1058324	PCNA	GACAAGTAATGTCGATAAAG	CCATGGGCGTGAACCTCACC
GGCTTTACGGTTATTTCGTTCCGGC	TEDH-1058325	PCNA	CGGTGTAAACCTGCAGAGCA	CACCGTTGAAGAGAGTGGAG
AGGGAGTAGTCCGTTATCCTACTGC	TEDH-1058841	PDS5A	GATCACCGACAAGATCACCA	CTTCTGTTTCCAGGTTGTGG
GGCCGTCTACTCCCATGTTGGGGCC	TEDH-1058845	PDS5A	GAATTCAGATGCAAGATGCA	GAATTCAAGCTGTGGCATGA
CGGCAAGTTAGTTCCCTTTATAACT	TEDH-1058843	PDS5A	GATTTAGCGAAGGATCTCAC	TGGCTCCAAAGATTCTGATT
AGTCATCTAATCGTGGATGAAGGTA	TEDH-1058842	PDS5A	CAGCCAAACAACATGCTACA	GCGTTTGATCATCTCGTCCG
TTTCCAGTCGTTGGTGGTATGGGTA	TEDH-1058850	PDS5B	GGATCTAGGCTCTTATGCAG	TCAGAGCATTGAATGAAATG
ATGTGTCCTGCGACTTTGCAGTTAT	TEDH-1058847	PDS5B	TCAACTCACGATCTGATGTG	CATGTCTAATAGCTTCCTCA
TCGGGTCTTTTGTTTTGGTCCACGT	TEDH-1058848	PDS5B	ATATGACCAATAGTAACCAA	GATATTTCCTTGACCCCAGG
GGTGTGAATATTTGGGTTTGGGGTC	TEDH-1058846	PDS5B	TATCGCATGGATACAATGAA	TATTCCACAGGAAGAAACAG
CGTGTAAGTGTCCACGTCCGGTATG	TEDH-1059030	PER1	CGACTGCCGCCAGAGCGCCG	GAGCCAGGAGCTCAGAGAAG
AGAGGCCGTTAAATTATGTGGGGGT	TEDH-1059027	PER1	CGTCCACAGCCCCAGCCCCA	CCGATCCTGCTTCAGCACAG
GGAAATTCGCGTAGCGGCCTAGATC	TEDH-1059026	PER1	CTACCAGCAGTGGAGCCTGG	GACTTTCCAGCAGATCTGTA
TCTAGAACATGTATGCAATGGCTTG	TEDH-1059031	PER2	GGTCCAGCTTCATCAACCCA	AACGCTCTCCATCTCCTCCA
CTATAAAGCTGCGTAATCTGTGGGG	TEDH-1059033	PER2	GGGCAGGTTTGGGGTCCCCG	CCTGAGGGCGTACTTCAAGG
TTATGCGGTTTGCTTCCGCTGGATG	TEDH-1059034	PER2	GTTCCGGGCGCGAAACCGAA	GGTAGCGGATTTCATTCTCG
GGCACACTGCGTACGATCTGGAGCG	TEDH-1059032	PER2	CGTGCCCTCCTACACCGTGG	CCACAAGGGAAGCTTGTACG
TCTGGTAGGGTAAGGACGTCAGGGC	TEDH-1059039	PER3	CGGGGCCAGGAGCTTCCCCG	CCATCAGAGAACGATCTTCA
CATGAGTGTCATTGCATCGTATGCA	TEDH-1059038	PER3	GGAGACCTCGAGATGCCCCG	ACTGGCATAGACCTGCTGCA
TAGAATCTTGCCGCTTTGTGTCTGT	TEDH-1059040	PER3	GGGACACGCACAGAACCGAA	AGCTCCACAGATCCTGTCCA
ATTCAGCGAATGCGTGGCAGTAGGT	TEDH-1059036	PER3	GGAACCTTGCTGTCTCACTG	TAAACACGTGGGGCTCACAG
TTGTTGTGGTGTAGTGTCGTTCAGG	TEDH-1059310	PGBD5	AAAGAGCTGGAAGAAGTCCA	AAGAACATTGTCTGACCCAG
TCTGATCCTCGTACCGCTTTGATAT	TEDH-1059307	PGBD5	ACTTGAGGATCTTCTCGAAG	GGGCTCGCGCTCGTCGTCCG
CGCATTAATCACTATTTATCTTCCG	TEDH-1059308	PGBD5	GCCTACTCCCCGGTGCAGCA	TCCACGGCACTGGCGCTGGG
[truncated: 1,371 more rows]
