# Supplementary material for: Parallel CRISPR-Cas9 screens clarify impacts of p53 on screen performance
Source: eLife. 2020 May 22;9:e55325. doi: 10.7554/eLife.55325 (PMC7244323; doi:10.7554/eLife.55325)
Supplement: Supplementary file 3. — Results of all analyses performed with MAGeCK. An Excel workbook with results divided by screen. The worksheet names match the screen names used in the paper. Columns in each worksheet give the log2 fold change (‘lfc’), false discovery rate (‘fdr’), -log10 FDR (‘fdr_log10’), p-value for enrichment (‘pos_p’) and p-value for depletion (‘neg_p’). [file elife-55325-supp3.xlsx]

## Sheet: This paper, KO vs WT
Gene	lfc	fdr	fdr_log10	pos_p	neg_p
CDKN1A	0.99055	0.00119	2.92445	4.9193e-06	0.99999
SETDB1	0.93533	0.00119	2.92445	4.9193e-06	1
TP53	2.1522	0.00119	2.92445	4.9193e-06	1
USP28	0.68276	0.00119	2.92445	4.9193e-06	1
USP7	-0.94253	0.004762	2.32221	1	4.9193e-06
MDM2	-0.8355	0.007937	2.10034	1	2.4597e-05
MDM4	-1.1921	0.007937	2.10034	1	2.4597e-05
SMARCD1	-0.77212	0.013095	1.88289	1	5.4113e-05
MORF4L1	-0.65977	0.01619	1.79075	0.99999	8.3628e-05
SCAF4	0.58102	0.018095	1.74244	9.3467e-05	0.99999
PPM1G	-1.3615	0.018254	1.73864	0.99991	0.00011314
CHEK2	0.64644	0.038776	1.41144	0.0002804	0.84909
TRIP12	0.70304	0.038776	1.41144	0.00027056	0.99988
EP300	0.40603	0.068452	1.16461	0.00056572	0.61237
TP53BP1	0.56635	0.124286	0.905578	0.0011954	0.65553
THRAP3	0.65689	0.124286	0.905578	0.0012839	0.9285
RAD21	0.49611	0.125108	0.902715	0.0014217	0.99728
RFC2	0.30367	0.170238	0.768943	0.0021104	0.99926
RPS27L	-1.0215	0.182738	0.738171	0.99946	0.0015004
PPM1D	-1.0881	0.182738	0.738171	0.99924	0.0015102
ATM	0.35946	0.195238	0.709436	0.002622	0.99946
UBE2C	-0.60309	0.202381	0.69383	0.99936	0.0019726
CREBBP	-0.41793	0.202381	0.69383	0.96838	0.0020907
ERCC6L2	-0.59453	0.225	0.647817	0.98487	0.0026712
FANCF	-0.95555	0.225	0.647817	0.99889	0.0027893
TAOK3	0.28815	0.230952	0.636478	0.0033402	0.9987
POLL	-0.36304	0.237798	0.623792	0.99933	0.0033599
WDR48	-0.67887	0.237798	0.623792	0.99929	0.0036747
FBXW7	-0.59404	0.237798	0.623792	0.58814	0.0038125
PDS5A	-0.59731	0.237798	0.623792	0.89685	0.0039305
POLE3	-0.91427	0.237815	0.623761	0.99811	0.0041765
ANKRD52	-0.40748	0.244709	0.61135	0.73365	0.0045504
TRIP13	-0.82793	0.264411	0.57772	0.41034	0.0051899
CHAF1A	0.3062	0.277143	0.557296	0.0042946	0.99909
LIG4	-0.81146	0.280238	0.552473	0.93644	0.00579
BRE	0.31939	0.311012	0.507223	0.0051407	0.99801
CNOT7	-0.4959	0.339538	0.469112	0.98951	0.0077578
BRCA1	-0.36925	0.339538	0.469112	0.99664	0.0088203
TOP2B	-0.32948	0.339538	0.469112	0.99655	0.0090466
CCNC	-0.36772	0.339538	0.469112	0.97363	0.0091155
HMGA1	-0.54442	0.339538	0.469112	0.99758	0.0092828
COPS7B	-0.81485	0.339538	0.469112	0.94526	0.0095091
UBE2M	-0.5215	0.339538	0.469112	0.99718	0.01069
EXO1	-0.69297	0.339538	0.469112	0.82194	0.010847
H3F3A	-0.4656	0.339538	0.469112	0.99427	0.010936
CCDC101	-0.55138	0.339538	0.469112	0.99585	0.010955
HELLS	-0.33961	0.339538	0.469112	0.90366	0.011216
H2AFX	-0.47667	0.339538	0.469112	0.99402	0.011565
BAZ1A	-0.64035	0.339538	0.469112	0.98822	0.011575
UBE2D3	-0.73506	0.342437	0.465419	0.99623	0.012028
DCUN1D3	0.30162	0.343137	0.464532	0.0060262	0.73965
SLX1A	-0.39668	0.358069	0.446033	0.95172	0.013159
ARID1A	-0.48018	0.358069	0.446033	0.98681	0.013317
OR4F21	-0.50239	0.378452	0.421989	0.99426	0.015009
FAM178A	-0.31455	0.378452	0.421989	0.99415	0.015353
PIAS4	-0.31945	0.378452	0.421989	0.99146	0.015619
BRAP	-0.56435	0.378452	0.421989	0.99161	0.015639
HNRNPUL1	-0.6681	0.384467	0.415141	0.96536	0.016524
UBE2S	-0.58842	0.384467	0.415141	0.99359	0.016681
RNF168	-0.24685	0.408117	0.389215	0.99301	0.018472
NEIL1	-0.38792	0.408117	0.389215	0.18436	0.018551
RNF7	0.27036	0.428	0.368556	0.010513	0.46036
BEND3	0.39277	0.428	0.368556	0.0094795	0.87924
APC	0.33371	0.428	0.368556	0.0087515	0.96159
RAD51C	0.42667	0.428	0.368556	0.0083776	0.97624
TAOK2	0.4398	0.428	0.368556	0.0094008	0.98958
OR51M1	0.27683	0.428	0.368556	0.011005	0.99581
NDNL2	0.34458	0.428	0.368556	0.011054	0.99711
CTC1	0.24761	0.428	0.368556	0.010109	0.99764
PER2	-0.31082	0.445185	0.351459	0.99443	0.020696
MBTD1	-0.44164	0.449586	0.347187	0.9942	0.021365
PSME3	-0.39242	0.451368	0.345469	0.99181	0.021916
SETMAR	0.36836	0.452564	0.34432	0.012156	0.99522
OTUD7B	-0.555	0.453869	0.343069	0.63845	0.022506
USP37	-0.3135	0.459733	0.337494	0.99322	0.024454
FBXO18	-0.29622	0.459733	0.337494	0.99307	0.024926
ERCC5	-0.40912	0.459733	0.337494	0.99053	0.025152
LMNA	-0.4081	0.459733	0.337494	0.89262	0.025152
NLK	-0.39751	0.459733	0.337494	0.53045	0.025694
APITD1	-0.23137	0.459733	0.337494	0.99279	0.026107
UBE2T	-0.69623	0.459733	0.337494	0.9856	0.026195
ZBTB2	-0.20156	0.459733	0.337494	0.99329	0.026638
UBE2D4	-0.52901	0.459733	0.337494	0.94358	0.027071
OR52K1	0.4565	0.470578	0.327368	0.013612	0.86332
UBE2D1	0.32674	0.470578	0.327368	0.013533	0.99477
ABL1	0.24915	0.483908	0.315237	0.014497	0.99668
PER1	-0.34276	0.488588	0.311057	0.98878	0.029275
CUL3	-0.08502	0.492778	0.307349	0.12822	0.030101
CAND1	-0.1414	0.492778	0.307349	0.99031	0.030544
ATMIN	-1.1513	0.493318	0.306873	0.98811	0.031243
PPP4R2	-0.41848	0.493318	0.306873	0.90278	0.031597
STAG1	0.46215	0.507988	0.294147	0.016268	0.99378
TELO2	0.45258	0.507988	0.294147	0.015796	0.99394
OR10A7	0.34953	0.513839	0.289173	0.016986	0.99092
OR6C4	0.36236	0.519048	0.284792	0.017695	0.99329
NOTCH3	0.19562	0.532633	0.273572	0.018708	0.9699
DAXX	-0.21692	0.561224	0.250864	0.98967	0.036526
PDS5B	-0.29383	0.580432	0.236249	0.98924	0.038376
KDM1A	-0.45947	0.581701	0.2353	0.94048	0.039182
PXMP2	-0.27277	0.581701	0.2353	0.98828	0.041081
WRN	-0.35656	0.581701	0.2353	0.83248	0.041249
PGBD5	-0.43741	0.581701	0.2353	0.98414	0.041288
HNRNPK	-0.40843	0.581701	0.2353	0.98387	0.041809
OGG1	-0.4497	0.581701	0.2353	0.8155	0.042065
MCM9	-0.18178	0.585907	0.232171	0.98728	0.043403
MVP	-0.33007	0.585907	0.232171	0.90362	0.044151
DCLRE1C	-0.43526	0.585907	0.232171	0.83379	0.044348
ANP32E	-0.4233	0.585907	0.232171	0.98102	0.04479
NPM1	-0.63793	0.586456	0.231765	0.97406	0.046227
KDM5A	-0.23646	0.586456	0.231765	0.98171	0.046315
OR11H1	-0.2673	0.586456	0.231765	0.91116	0.04665
FANCG	-0.52691	0.620452	0.207292	0.75344	0.049995
BOD1L1	-0.26308	0.62393	0.204864	0.9821	0.05092
OR10S1	-0.24206	0.628155	0.201933	0.97962	0.051914
BPTF	0.32421	0.633878	0.197994	0.022919	0.8903
FANCM	-0.20359	0.637331	0.195635	0.79705	0.05333
USP11	0.3589	0.639141	0.194403	0.026668	0.54083
APBB1	0.27239	0.639141	0.194403	0.027071	0.81291
FOXO3	0.29372	0.639141	0.194403	0.026205	0.99017
MCM6	0.35548	0.639141	0.194403	0.026038	0.99022
RUVBL1	0.4058	0.639141	0.194403	0.02533	0.99045
PPP6R3	0.33072	0.639141	0.194403	0.025418	0.99116
OR2F2	-0.34995	0.643431	0.191498	0.69667	0.05517
NFE2L2	-0.40346	0.645181	0.190318	0.96854	0.055987
GPI	0.4189	0.645958	0.189796	0.028694	0.99203
HPRT1	0.12087	0.645958	0.189796	0.028448	0.99267
HDAC2	-0.26376	0.647231	0.188941	0.97706	0.057502
USP1	-0.28675	0.652916	0.185143	0.97631	0.059253
SSBP2	-0.1949	0.652916	0.185143	0.97624	0.05943
SIN3A	-0.2742	0.652916	0.185143	0.92387	0.06003
USP22	-0.3192	0.659101	0.181048	0.97662	0.06128
SUMO2	-0.1589	0.6618	0.179273	0.975	0.062215
PALB2	-0.23761	0.668064	0.175182	0.97444	0.063494
MUM1	-0.30632	0.671326	0.173067	0.80672	0.064497
CHD3	0.015997	0.67164	0.172863	0.031223	0.48885
CLSPN	0.16984	0.67164	0.172863	0.030534	0.99162
CHEK1	-0.37325	0.67281	0.172108	0.96258	0.066209
TFPT	-0.3224	0.67281	0.172108	0.73217	0.067488
NUDT16L1	-0.29565	0.67281	0.172108	0.84998	0.067833
SET	-0.47481	0.67281	0.172108	0.69436	0.068767
UBB	-0.47768	0.67281	0.172108	0.93162	0.069053
EXO5	-0.22314	0.67281	0.172108	0.80172	0.069417
RNF138	-0.062213	0.67281	0.172108	0.48071	0.069505
DUT	-0.32958	0.678406	0.16851	0.97117	0.070784
CDC5L	-0.80298	0.690569	0.160793	0.79651	0.073116
TDP1	-0.32398	0.690569	0.160793	0.63399	0.07348
MYBBP1A	0.25548	0.69265	0.159486	0.032915	0.99097
LATS1	-0.16176	0.695631	0.157621	0.61937	0.075861
OR6B2	-0.25604	0.695631	0.157621	0.96812	0.076943
CBX5	-0.48445	0.695631	0.157621	0.69295	0.077474
PARP1	-0.33527	0.695631	0.157621	0.7387	0.078006
RBBP7	-0.51033	0.695631	0.157621	0.7956	0.07833
UCHL5	-0.28119	0.703947	0.15246	0.85817	0.080278
RNF8	-0.4361	0.703947	0.15246	0.73824	0.080721
SUV39H1	-0.19124	0.710535	0.148415	0.80953	0.082236
MORF4L2	-0.27675	0.710535	0.148415	0.84092	0.082945
NONO	-0.25904	0.727277	0.1383	0.70915	0.08565
SIRT5	-0.16912	0.732629	0.135116	0.96395	0.087038
CDKN2D	0.2224	0.734791	0.133836	0.037195	0.55621
CCNB1	0.43915	0.734791	0.133836	0.037136	0.92258
BRCC3	0.20267	0.734791	0.133836	0.036152	0.98606
OR7A5	-0.34805	0.741092	0.130128	0.88913	0.088809
CUL1	0.32701	0.743905	0.128483	0.038425	0.98525
PRMT6	-0.35018	0.747863	0.126178	0.24099	0.090393
KLHL15	-0.17965	0.747902	0.126155	0.96214	0.09117
RNF165	0.30052	0.754342	0.122432	0.039743	0.80216
MCM3AP	-0.24943	0.763742	0.117053	0.96009	0.096315
DTX2	-0.23149	0.763742	0.117053	0.94462	0.096916
PARP15	-0.11273	0.763742	0.117053	0.6172	0.097762
EID3	-0.24527	0.763742	0.117053	0.76829	0.098775
DCLRE1B	-0.16371	0.763742	0.117053	0.23888	0.099267
CDC34	-0.15432	0.763742	0.117053	0.95875	0.099434
BAZ1B	-0.27707	0.763742	0.117053	0.68428	0.099877
PNN	-0.2638	0.763742	0.117053	0.90197	0.1002
HUS1B	0.15232	0.765848	0.115857	0.050635	0.33792
USP34	0.29064	0.765848	0.115857	0.046984	0.56594
OR4K1	0.22964	0.765848	0.115857	0.049208	0.57061
NCAPH	0.44203	0.765848	0.115857	0.04665	0.83497
RFC1	0.17935	0.765848	0.115857	0.050585	0.88057
THOC1	0.41289	0.765848	0.115857	0.048382	0.966
XAB2	0.34696	0.765848	0.115857	0.047791	0.98127
CDK7	0.23251	0.765848	0.115857	0.047103	0.9815
COPS7A	0.30735	0.765848	0.115857	0.042892	0.98337
OR52A5	0.23385	0.765848	0.115857	0.041632	0.98393
INO80	0.43018	0.765848	0.115857	0.045951	0.98486
SCAF11	0.26918	0.765848	0.115857	0.047348	0.98587
MRE11A	0.18031	0.765848	0.115857	0.043767	0.98715
H3F3B	-0.20822	0.767956	0.114664	0.92958	0.10265
WAPAL	-0.22219	0.767956	0.114664	0.96816	0.10334
BTG2	-0.28999	0.767956	0.114664	0.957	0.10353
NEDD8	-0.2048	0.767956	0.114664	0.62406	0.10414
TERF1	-0.44402	0.767956	0.114664	0.92365	0.10479
OR5A2	-0.31951	0.767956	0.114664	0.9562	0.10551
DYNLL1	-0.089765	0.770763	0.113079	0.8029	0.10701
GABBR1	-0.2345	0.770763	0.113079	0.93822	0.10814
HUS1	-0.23293	0.770763	0.113079	0.95506	0.10829
CBX1	-0.33515	0.773418	0.111586	0.95353	0.11124
BRD1	-0.091466	0.773418	0.111586	0.94299	0.11259
CHD1L	-0.16875	0.773418	0.111586	0.90466	0.11363
TRIM34	-0.30289	0.773418	0.111586	0.44903	0.11364
RTF1	-0.28615	0.773418	0.111586	0.94399	0.11405
MLH1	-0.30867	0.773418	0.111586	0.95183	0.11455
PARK7	-0.32624	0.773418	0.111586	0.83198	0.11528
POLE4	-0.19432	0.773418	0.111586	0.95128	0.11578
YTHDF2	-0.17988	0.773418	0.111586	0.66733	0.11638
RAD17	-0.16243	0.773418	0.111586	0.95099	0.11665
PRKCG	-0.27835	0.77812	0.108953	0.65189	0.11832
OR8B3	-0.3125	0.77812	0.108953	0.46929	0.12103
STRA13	-0.18924	0.77812	0.108953	0.56485	0.12132
RAD9A	-0.25135	0.77812	0.108953	0.42965	0.12232
RNASEH2A	-0.42513	0.77812	0.108953	0.92979	0.12232
ALKBH2	-0.021039	0.77812	0.108953	0.6823	0.12274
MEN1	-0.47352	0.77812	0.108953	0.92005	0.12299
PRMT1	-0.14939	0.780056	0.107874	0.94119	0.1241
PLK1	0.34594	0.784982	0.10514	0.052711	0.98407
DTX1	0.1789	0.785004	0.105128	0.053773	0.92369
POLR2E	0.32017	0.785004	0.105128	0.054334	0.97862
TET2	0.31251	0.791246	0.101688	0.055583	0.97796
ERCC8	-0.10637	0.794255	0.10004	0.53792	0.12718
SWI5	-0.24169	0.794353	0.0999865	0.91098	0.12802
ATXN3	0.21046	0.798137	0.0979226	0.056892	0.83643
OR52M1	-0.38409	0.806439	0.0934285	0.79197	0.13174
FIGNL1	-0.41146	0.806439	0.0934285	0.52277	0.13239
FANCI	-0.17607	0.806439	0.0934285	0.78049	0.13246
HMGN1	-0.53269	0.821311	0.0854924	0.87361	0.13591
STAG2	-0.15771	0.821311	0.0854924	0.93844	0.13712
OR52I1	-0.34388	0.821311	0.0854924	0.55906	0.13745
PPP6C	-0.0090717	0.837306	0.0771158	0.088622	0.14099
PAGR1	-0.18397	0.84126	0.0750698	0.95718	0.14253
CDKN1B	0.39882	0.841293	0.0750527	0.060837	0.63402
HMGB1	-0.081808	0.842338	0.0745136	0.49175	0.14358
AUNIP	-0.27144	0.856683	0.0671799	0.65848	0.14734
HES1	-0.13941	0.856683	0.0671799	0.92036	0.14863
UBE2W	-0.11691	0.856683	0.0671799	0.76409	0.14999
SSBP3	-0.19383	0.856683	0.0671799	0.83653	0.1512
NCAPD2	-0.17802	0.856683	0.0671799	0.90993	0.1519
ARID1B	-0.38237	0.856683	0.0671799	0.91407	0.1529
BRIP1	-0.37233	0.856683	0.0671799	0.78312	0.15438
MCM7	-0.50778	0.856683	0.0671799	0.54632	0.1549
USP51	-0.018282	0.856683	0.0671799	0.74355	0.15537
FANCA	-0.3491	0.856683	0.0671799	0.61363	0.15544
FANCC	-0.31297	0.856683	0.0671799	0.77488	0.15576
TDG	-0.022498	0.856685	0.0671788	0.52572	0.15665
COPS8	-0.23209	0.859785	0.0656101	0.90676	0.15931
XPA	-0.30064	0.859785	0.0656101	0.73198	0.16031
RAD1	-0.24354	0.859785	0.0656101	0.24471	0.16038
GTF2H5	-0.33119	0.859785	0.0656101	0.86115	0.16079
UBE2V2	-0.14689	0.865288	0.0628393	0.7072	0.16358
H2AFY2	-0.26272	0.869073	0.0609437	0.27513	0.1655
SERBP1	-0.37732	0.869073	0.0609437	0.39384	0.16717
BRD2	-0.54998	0.869073	0.0609437	0.82972	0.16748
ZDHHC16	-0.2022	0.869073	0.0609437	0.84356	0.16851
SMARCAD1	-0.17909	0.869073	0.0609437	0.80537	0.16879
CASP3	-0.21035	0.87032	0.060321	0.97654	0.16993
C4orf27	-0.24528	0.871057	0.0599534	0.93563	0.17147
NEIL2	-0.18562	0.871057	0.0599534	0.94573	0.17277
OR1E1	0.41118	0.872619	0.0591753	0.064497	0.65013
POLB	0.19393	0.872619	0.0591753	0.067065	0.74703
EYA2	0.50893	0.872619	0.0591753	0.067665	0.91371
OR4D6	0.2288	0.872619	0.0591753	0.067714	0.96187
RAP1A	0.16206	0.872619	0.0591753	0.068511	0.9724
ERCC3	0.33103	0.872619	0.0591753	0.065097	0.97384
TONSL	0.044325	0.873779	0.0585984	0.069505	0.53121
RIF1	-0.22688	0.892186	0.0495446	0.98129	0.17973
CRY2	-0.23824	0.89259	0.049348	0.73406	0.18073
XRCC2	-0.27677	0.893812	0.0487538	0.72945	0.1819
RAD54B	-0.22809	0.895307	0.048028	0.94406	0.18354
OR10H3	-0.14295	0.895307	0.048028	0.92402	0.18641
OR51B4	-0.17426	0.895307	0.048028	0.56189	0.18642
C17orf70	-0.30404	0.895307	0.048028	0.88788	0.18796
ZMPSTE24	-0.19427	0.895307	0.048028	0.94226	0.18835
HELQ	-0.10357	0.895307	0.048028	0.94486	0.18868
PPP6R2	-0.14891	0.895307	0.048028	0.50156	0.18995
OR8G1	-0.18731	0.895307	0.048028	0.83268	0.19053
MARK3	-0.20809	0.912698	0.0396729	0.41571	0.19517
SPRTN	0.21202	0.92126	0.0356178	0.094092	0.42854
RNF126	0.33311	0.92126	0.0356178	0.080406	0.49207
COL1A1	0.27736	0.92126	0.0356178	0.09422	0.75671
ECT2	0.20158	0.92126	0.0356178	0.08808	0.83693
UPF1	0.62473	0.92126	0.0356178	0.088572	0.87936
POLA1	0.35506	0.92126	0.0356178	0.091927	0.88376
SF3B1	0.31301	0.92126	0.0356178	0.082226	0.91315
SUPT16H	0.2858	0.92126	0.0356178	0.090717	0.93877
USP45	0.23892	0.92126	0.0356178	0.093354	0.9467
UBE2K	0.27102	0.92126	0.0356178	0.091918	0.94767
OR9I1	0.21175	0.92126	0.0356178	0.090029	0.94882
MCM3	0.2269	0.92126	0.0356178	0.094171	0.95026
MNAT1	0.27421	0.92126	0.0356178	0.083791	0.9526
TTI1	0.25662	0.92126	0.0356178	0.083614	0.95275
DTX3L	0.3228	0.92126	0.0356178	0.092055	0.96127
DTX4	0.14401	0.92126	0.0356178	0.089763	0.9628
RAD54L2	0.16879	0.92126	0.0356178	0.084135	0.96507
MUS81	0.22956	0.92126	0.0356178	0.080741	0.96651
OR1F1	0.27437	0.92126	0.0356178	0.080396	0.96667
UBA1	0.81735	0.928251	0.0323346	0.099729	0.68752
TOP1	0.27683	0.928251	0.0323346	0.09846	0.90564
OR4B1	0.19148	0.928251	0.0323346	0.099129	0.95892
RAD54L	0.19321	0.928251	0.0323346	0.098096	0.95932
RRM2B	0.23484	0.928251	0.0323346	0.096758	0.95988
OR52L1	-0.25225	0.933447	0.0299103	0.69782	0.20066
OR56A3	-0.27641	0.933447	0.0299103	0.79946	0.20154
LATS2	-0.10242	0.934354	0.0294886	0.58442	0.2027
WHSC1	-0.23777	0.936335	0.0285687	0.66102	0.2041
MCRS1	0.18882	0.938639	0.0275014	0.10182	0.95793
CSNK2A1	-0.24541	0.941757	0.0260611	0.69701	0.20625
PTEN	-0.10344	0.942879	0.025544	0.5312	0.20747
RHO	0.10421	0.947975	0.0232031	0.10479	0.68644
FAM175B	0.25264	0.947975	0.0232031	0.10425	0.94015
HIPK2	0.0043194	0.949427	0.0225384	0.10593	0.83881
USP10	-0.24009	0.956053	0.019518	0.74224	0.21136
OR2T35	0.0079224	0.963164	0.0162998	0.15065	0.0753
OR52H1	0.23608	0.963164	0.0162998	0.15582	0.17453
ALKBH1	0.059926	0.963164	0.0162998	0.16679	0.38139
XRCC4	0.19211	0.963164	0.0162998	0.12572	0.39349
NOP10	0.28534	0.963164	0.0162998	0.13834	0.42167
HDAC4	0.25884	0.963164	0.0162998	0.16797	0.447
APOBEC3D	0.065388	0.963164	0.0162998	0.15006	0.45496
MSH3	0.2789	0.963164	0.0162998	0.15252	0.45665
SMARCB1	0.11577	0.963164	0.0162998	0.17052	0.4567
OR4F6	0.30525	0.963164	0.0162998	0.17396	0.47707
SMARCC2	0.25517	0.963164	0.0162998	0.17426	0.50989
DCLRE1A	0.070359	0.963164	0.0162998	0.20505	0.52847
CCND2	0.20442	0.963164	0.0162998	0.15959	0.52927
UBE2I	0.076669	0.963164	0.0162998	0.11467	0.54558
ATAD5	0.11398	0.963164	0.0162998	0.11832	0.5567
RAD51D	0.027032	0.963164	0.0162998	0.14137	0.58438
TTI2	0.48695	0.963164	0.0162998	0.1877	0.59297
RFC5	0.10463	0.963164	0.0162998	0.16465	0.59957
SMC5	0.12616	0.963164	0.0162998	0.16066	0.61879
UBE2A	0.0038222	0.963164	0.0162998	0.16176	0.64428
NEK1	0.24084	0.963164	0.0162998	0.16753	0.64461
CBX4	0.13818	0.963164	0.0162998	0.19216	0.64499
SMC1A	0.35779	0.963164	0.0162998	0.12899	0.65328
EXD2	0.22263	0.963164	0.0162998	0.13466	0.65639
PRDM10	0.21073	0.963164	0.0162998	0.20002	0.67761
TINF2	0.0065461	0.963164	0.0162998	0.19067	0.6866
RFC3	0.071071	0.963164	0.0162998	0.15668	0.6895
PTPN2	0.11613	0.963164	0.0162998	0.20094	0.69407
USP13	0.19579	0.963164	0.0162998	0.19512	0.7103
TRAIP	0.16108	0.963164	0.0162998	0.19911	0.72007
CRY1	0.00047051	0.963164	0.0162998	0.20109	0.72031
CDCA5	0.26018	0.963164	0.0162998	0.182	0.73123
SMC6	0.18608	0.963164	0.0162998	0.11659	0.74017
CSNK2B	0.25156	0.963164	0.0162998	0.11522	0.74928
CDK2	0.2839	0.963164	0.0162998	0.20249	0.75091
OR5AK2	0.21342	0.963164	0.0162998	0.11099	0.75257
EYA4	0.17889	0.963164	0.0162998	0.20366	0.75442
BABAM1	0.16807	0.963164	0.0162998	0.16728	0.76393
TIMELESS	0.23915	0.963164	0.0162998	0.13996	0.76451
PRIMPOL	0.28832	0.963164	0.0162998	0.17054	0.77691
CDK1	0.20886	0.963164	0.0162998	0.20355	0.79084
OR10T2	0.23771	0.963164	0.0162998	0.15028	0.79361
HINFP	0.24301	0.963164	0.0162998	0.14814	0.79769
CDKN2A	0.29259	0.963164	0.0162998	0.15969	0.80014
CDC25B	0.29156	0.963164	0.0162998	0.19539	0.81068
ACTR8	0.30014	0.963164	0.0162998	0.13486	0.81579
NBN	0.19952	0.963164	0.0162998	0.13936	0.81625
ACTL6A	0.25563	0.963164	0.0162998	0.11728	0.81652
NCAPG2	0.35089	0.963164	0.0162998	0.18998	0.83733
C1orf115	0.30707	0.963164	0.0162998	0.19581	0.83787
POLE	0.424	0.963164	0.0162998	0.17304	0.83989
OR10H5	0.28354	0.963164	0.0162998	0.18005	0.84117
NSMCE1	0.20174	0.963164	0.0162998	0.19939	0.84206
PRDM9	0.60539	0.963164	0.0162998	0.20671	0.84334
OR51F1	0.068232	0.963164	0.0162998	0.19754	0.84884
SPTBN1	0.29005	0.963164	0.0162998	0.18079	0.85261
HLTF	0.013096	0.963164	0.0162998	0.17157	0.86665
OR4L1	0.1968	0.963164	0.0162998	0.17667	0.86804
OR51I1	0.10132	0.963164	0.0162998	0.19663	0.8822
DKC1	0.20089	0.963164	0.0162998	0.18642	0.88894
PARPBP	0.21528	0.963164	0.0162998	0.18474	0.89022
OR13C4	0.20542	0.963164	0.0162998	0.19403	0.8941
DNMT1	0.19194	0.963164	0.0162998	0.12995	0.90059
MCM2	0.29405	0.963164	0.0162998	0.20696	0.9006
DDX11	0.14602	0.963164	0.0162998	0.17797	0.90083
OTUB2	0.15942	0.963164	0.0162998	0.16895	0.90083
CDC7	0.13504	0.963164	0.0162998	0.16925	0.90667
USP4	0.38649	0.963164	0.0162998	0.15903	0.91006
RBX1	0.25975	0.963164	0.0162998	0.19326	0.92152
XPC	0.13144	0.963164	0.0162998	0.1323	0.92385
OR5M10	0.17624	0.963164	0.0162998	0.13197	0.92397
CCNH	0.23997	0.963164	0.0162998	0.13866	0.92444
OR9G1	0.36258	0.963164	0.0162998	0.12444	0.92536
COPS3	0.35667	0.963164	0.0162998	0.1289	0.92568
TDP2	0.16044	0.963164	0.0162998	0.20062	0.92597
MSH4	0.19752	0.963164	0.0162998	0.11584	0.93075
OR5AP2	0.18385	0.963164	0.0162998	0.17229	0.93547
INO80E	0.20115	0.963164	0.0162998	0.15219	0.93847
OR4F15	0.28499	0.963164	0.0162998	0.14618	0.93984
TCEB1	0.082296	0.963164	0.0162998	0.13668	0.94183
NCAPG	0.18876	0.963164	0.0162998	0.13546	0.94241
NCAPD3	0.13711	0.963164	0.0162998	0.11632	0.9425
POLD1	0.29694	0.963164	0.0162998	0.13376	0.94324
PHIP	0.13749	0.963164	0.0162998	0.13266	0.94393
RAG2	0.35431	0.963164	0.0162998	0.12911	0.94535
PML	0.10831	0.963164	0.0162998	0.1287	0.94552
SCAF8	0.19832	0.963164	0.0162998	0.14629	0.95028
OR5M9	0.11991	0.963164	0.0162998	0.11753	0.95061
SOD1	0.25783	0.963164	0.0162998	0.1395	0.95859
POT1	0.44028	0.963164	0.0162998	0.11285	0.96722
EP400	0.18247	0.963164	0.0162998	0.20192	0.96729
EZH2	0.17021	0.963164	0.0162998	0.18995	0.98366
SMC1B	0.06563	0.966689	0.0147132	0.20903	0.73464
NEK8	0.16531	0.966689	0.0147132	0.20972	0.89826
PARP3	-0.19574	0.97145	0.0125795	0.97327	0.2168
NOTCH4	-0.13206	0.97145	0.0125795	0.70644	0.21781
OR10Z1	-0.23933	0.97145	0.0125795	0.5459	0.21797
CNOT4	-0.2228	0.97145	0.0125795	0.79623	0.21878
NFRKB	0.18872	0.973257	0.0117725	0.21215	0.71501
BRD7	0.0073633	0.974416	0.0112556	0.21341	0.39671
RNF169	-0.14079	0.974768	0.0110987	0.42634	0.22146
ENDOV	-0.43633	0.974768	0.0110987	0.85559	0.2218
KEAP1	0.067157	0.976558	0.010302	0.22138	0.4607
TAF1L	0.25994	0.976558	0.010302	0.21909	0.56858
RNF146	0.14391	0.976558	0.010302	0.22063	0.63187
SPIDR	0.14484	0.976558	0.010302	0.22144	0.69108
TRAPPC13	0.13932	0.976558	0.010302	0.22195	0.86456
ESCO2	0.13167	0.976558	0.010302	0.21681	0.92839
CEP164	0.16721	0.976558	0.010302	0.22109	0.97581
PMS1	0.03284	0.977572	0.00985125	0.22348	0.44654
RRM1	0.20391	0.977572	0.00985125	0.22525	0.4811
RNF113B	0.20046	0.977572	0.00985125	0.2247	0.52188
EIF4A1	0.23815	0.977572	0.00985125	0.22622	0.92018
OR6K3	-0.24613	0.978743	0.00933133	0.76716	0.22446
EYA1	0.087543	0.982582	0.0076312	0.22839	0.78935
Scrambled	0.16072	0.982954	0.00746681	0.22949	0.96829
BRD4	0.14288	0.985568	0.00631341	0.23195	0.70344
SUMO4	0.24302	0.985568	0.00631341	0.23214	0.8078
BCAS2	0.088114	0.986754	0.0057911	0.23344	0.945
PIAS2	0.17098	0.988204	0.00515339	0.24084	0.57885
GPS1	0.29701	0.988204	0.00515339	0.23706	0.58628
COPS5	0.20857	0.988204	0.00515339	0.24571	0.5963
METTL3	0.22589	0.988204	0.00515339	0.23854	0.77246
OR52B4	0.15791	0.988204	0.00515339	0.2438	0.84929
OR4K14	0.079376	0.988204	0.00515339	0.24277	0.84987
POLR2B	0.25921	0.988204	0.00515339	0.24603	0.89564
FAM122A	0.15704	0.988204	0.00515339	0.24351	0.96359
POLR2C	0.22629	0.988204	0.00515339	0.23562	0.96636
ADH5	-0.12631	0.998667	0.000579301	0.71131	0.23178
DMC1	-0.056207	0.998667	0.000579301	0.79322	0.23213
OR1D5	0.017599	0.999995	2.17148e-06	0.80396	0.054885
DSCC1	0.14664	0.999995	2.17148e-06	0.35075	0.056892
TCOF1	0.025711	0.999995	2.17148e-06	0.59442	0.094171
KDM4A	0.29296	0.999995	2.17148e-06	0.3013	0.16165
OR8B8	0.049273	0.999995	2.17148e-06	0.78345	0.17204
OR4P4	0.037984	0.999995	2.17148e-06	0.40852	0.17582
SLFN11	0.07703	0.999995	2.17148e-06	0.45398	0.18523
OR5AN1	0.031323	0.999995	2.17148e-06	0.53721	0.22255
OR4A47	0.058976	0.999995	2.17148e-06	0.73131	0.22573
CHD4	-0.0286	0.999995	2.17148e-06	0.80206	0.23533
SUV39H2	-0.17275	0.999995	2.17148e-06	0.51524	0.23931
FBXO22	-0.39833	0.999995	2.17148e-06	0.96265	0.23948
TNP1	-0.16291	0.999995	2.17148e-06	0.71405	0.24011
UIMC1	-0.17354	0.999995	2.17148e-06	0.84146	0.24087
RAD23B	-0.14046	0.999995	2.17148e-06	0.71798	0.24129
ZMYM3	-0.1922	0.999995	2.17148e-06	0.089881	0.24518
FZR1	-0.16554	0.999995	2.17148e-06	0.89714	0.24571
NABP1	-0.052559	0.999995	2.17148e-06	0.37883	0.24942
FANCE	-0.18604	0.999995	2.17148e-06	0.85159	0.25109
DCAF11	-0.23807	0.999995	2.17148e-06	0.84955	0.25159
RAD9B	-0.18025	0.999995	2.17148e-06	0.91962	0.25275
CDK8	-0.17403	0.999995	2.17148e-06	0.9158	0.25498
DNTT	-0.13118	0.999995	2.17148e-06	0.901	0.25573
MTA3	-0.11423	0.999995	2.17148e-06	0.74424	0.25733
EME1	-0.23886	0.999995	2.17148e-06	0.39766	0.26174
WDR76	0.08344	0.999995	2.17148e-06	0.51411	0.26224
PPP6R1	-0.1895	0.999995	2.17148e-06	0.59203	0.26563
IP6K3	-0.21352	0.999995	2.17148e-06	0.47997	0.26573
OR4C46	-0.17001	0.999995	2.17148e-06	0.42533	0.26613
OR10R2	-0.023647	0.999995	2.17148e-06	0.56631	0.26622
DCUN1D4	0.0091012	0.999995	2.17148e-06	0.84998	0.26855
APOBEC3G	-0.20504	0.999995	2.17148e-06	0.49486	0.27242
RNF113A	-0.24155	0.999995	2.17148e-06	0.76338	0.27258
GLG1	-0.088311	0.999995	2.17148e-06	0.31441	0.27304
OR8G2	-0.18698	0.999995	2.17148e-06	0.6756	0.27329
PHF11	0.015538	0.999995	2.17148e-06	0.86525	0.27553
OR6X1	-0.15824	0.999995	2.17148e-06	0.37703	0.27627
NEK9	-0.16609	0.999995	2.17148e-06	0.75545	0.27853
GTF2H2	-0.14502	0.999995	2.17148e-06	0.81893	0.27864
PIAS3	-0.19346	0.999995	2.17148e-06	0.67014	0.27867
RNF2	-0.13218	0.999995	2.17148e-06	0.85076	0.28028
POLH	-0.15244	0.999995	2.17148e-06	0.83733	0.28097
PMS2	-0.22764	0.999995	2.17148e-06	0.77544	0.28369
MTA1	-0.1305	0.999995	2.17148e-06	0.34862	0.28573
OR52N5	-0.16988	0.999995	2.17148e-06	0.53126	0.28925
BRD8	0.085322	0.999995	2.17148e-06	0.36226	0.29002
ANKRD32	-0.055148	0.999995	2.17148e-06	0.63761	0.29333
OR51G2	-0.18529	0.999995	2.17148e-06	0.92941	0.29382
APEX1	-0.14912	0.999995	2.17148e-06	0.9511	0.2941
RNF17	0.10795	0.999995	2.17148e-06	0.26729	0.29457
ACTR5	-0.025138	0.999995	2.17148e-06	0.20314	0.29483
PPP4C	-0.2127	0.999995	2.17148e-06	0.26753	0.29548
LIG1	-0.032206	0.999995	2.17148e-06	0.32852	0.30012
PCNA	-0.24191	0.999995	2.17148e-06	0.45283	0.30151
DROSHA	0.16567	0.999995	2.17148e-06	0.37904	0.30223
REV1	-0.11372	0.999995	2.17148e-06	0.84939	0.30291
APTX	-0.17917	0.999995	2.17148e-06	0.63029	0.30379
PIAS1	-0.1258	0.999995	2.17148e-06	0.90045	0.30437
FAF1	-0.14608	0.999995	2.17148e-06	0.92456	0.30691
SHPRH	-0.11539	0.999995	2.17148e-06	0.08141	0.30977
ASH1L	-0.11503	0.999995	2.17148e-06	0.94812	0.31049
RRM2	0.050482	0.999995	2.17148e-06	0.81197	0.31382
C9orf142	-0.16264	0.999995	2.17148e-06	0.51599	0.31515
CHRAC1	-0.1541	0.999995	2.17148e-06	0.93741	0.31545
OR56B1	0.019605	0.999995	2.17148e-06	0.80569	0.31869
SMARCE1	-0.11916	0.999995	2.17148e-06	0.57423	0.32243
GAR1	0.06239	0.999995	2.17148e-06	0.52749	0.32339
TAF6L	-0.10555	0.999995	2.17148e-06	0.73074	0.32556
SUMO1	-0.1427	0.999995	2.17148e-06	0.94093	0.32686
MPLKIP	-0.1555	0.999995	2.17148e-06	0.80581	0.32838
TRIM28	-0.13239	0.999995	2.17148e-06	0.87236	0.3287
RAD52	-0.23023	0.999995	2.17148e-06	0.82801	0.32887
MPG	-0.10081	0.999995	2.17148e-06	0.84496	0.32891
NEIL3	-0.0081984	0.999995	2.17148e-06	0.3214	0.32895
NHEJ1	-0.10844	0.999995	2.17148e-06	0.57079	0.32943
RAD18	-0.19002	0.999995	2.17148e-06	0.56448	0.33216
OR5T1	-0.14974	0.999995	2.17148e-06	0.78706	0.33247
WRNIP1	-0.10843	0.999995	2.17148e-06	0.57498	0.33443
POLG2	-0.11526	0.999995	2.17148e-06	0.57679	0.33491
MAPK8	-0.093925	0.999995	2.17148e-06	0.18306	0.33533
MTA2	-0.093813	0.999995	2.17148e-06	0.2937	0.33585
ASCC1	-0.098359	0.999995	2.17148e-06	0.52779	0.33625
TREX1	0.082416	0.999995	2.17148e-06	0.44112	0.33967
NHP2	-0.26328	0.999995	2.17148e-06	0.74577	0.34089
SLBP	-0.21214	0.999995	2.17148e-06	0.72067	0.34157
DNAJC2	0.011962	0.999995	2.17148e-06	0.42004	0.34483
UBE2F	0.097553	0.999995	2.17148e-06	0.40994	0.3455
UNG	-0.19846	0.999995	2.17148e-06	0.77906	0.34657
SIRT1	-0.085624	0.999995	2.17148e-06	0.81463	0.34704
TAF1	-0.13498	0.999995	2.17148e-06	0.65503	0.34817
LIG3	-0.14482	0.999995	2.17148e-06	0.34604	0.35004
COL21A1	-0.07045	0.999995	2.17148e-06	0.69403	0.35083
POLQ	-0.18041	0.999995	2.17148e-06	0.94183	0.35183
HELB	-0.025267	0.999995	2.17148e-06	0.83519	0.35255
H2AFZ	-0.17813	0.999995	2.17148e-06	0.50544	0.35321
MCM8	-0.025686	0.999995	2.17148e-06	0.14561	0.35361
UBE2D2	-0.039603	0.999995	2.17148e-06	0.78196	0.35424
OR1N1	-0.10618	0.999995	2.17148e-06	0.3111	0.35467
TOPORS	-0.022363	0.999995	2.17148e-06	0.60374	0.35554
USP44	-0.11214	0.999995	2.17148e-06	0.61608	0.35568
OR11H6	-0.034927	0.999995	2.17148e-06	0.43045	0.35944
DLGAP5	-0.064479	0.999995	2.17148e-06	0.78773	0.35965
USP20	-0.034455	0.999995	2.17148e-06	0.51756	0.36192
SIRT2	-0.25516	0.999995	2.17148e-06	0.83303	0.36443
CDK4	-0.1497	0.999995	2.17148e-06	0.66051	0.36504
RINN1	-0.091907	0.999995	2.17148e-06	0.91371	0.36707
C1orf86	-0.14497	0.999995	2.17148e-06	0.9006	0.3682
SP100	-0.015892	0.999995	2.17148e-06	0.54851	0.37227
NTHL1	0.016477	0.999995	2.17148e-06	0.82701	0.37323
FANCL	0.054079	0.999995	2.17148e-06	0.46274	0.37492
SMEK2	-0.035288	0.999995	2.17148e-06	0.86539	0.37577
OR13C2	-0.10362	0.999995	2.17148e-06	0.40421	0.3781
MCM10	-0.17728	0.999995	2.17148e-06	0.79978	0.37886
USP15	-0.060931	0.999995	2.17148e-06	0.45807	0.38048
CBX3	-0.063372	0.999995	2.17148e-06	0.92769	0.38075
WEE1	0.037961	0.999995	2.17148e-06	0.75226	0.3826
APOBEC3H	-0.14153	0.999995	2.17148e-06	0.54697	0.3829
MCM4	0.045837	0.999995	2.17148e-06	0.66481	0.38516
OR4C45	-0.10416	0.999995	2.17148e-06	0.58644	0.38668
TERF2IP	-0.17111	0.999995	2.17148e-06	0.53836	0.39079
HDAC1	-0.099156	0.999995	2.17148e-06	0.57173	0.39212
DDB1	-0.15801	0.999995	2.17148e-06	0.57317	0.39328
SMC4	-0.17727	0.999995	2.17148e-06	0.76616	0.39418
RPA3	0.25197	0.999995	2.17148e-06	0.259	0.39517
TNKS	-0.087105	0.999995	2.17148e-06	0.77082	0.39561
IGHMBP2	-0.10244	0.999995	2.17148e-06	0.68116	0.39753
CHFR	0.061994	0.999995	2.17148e-06	0.63984	0.39765
CCNB3	-0.18721	0.999995	2.17148e-06	0.45369	0.3986
GTF2H1	0.10374	0.999995	2.17148e-06	0.4545	0.39942
CLK2	-0.0088165	0.999995	2.17148e-06	0.48795	0.40148
CEP63	-0.054089	0.999995	2.17148e-06	0.73715	0.4016
SENP6	-0.13969	0.999995	2.17148e-06	0.80525	0.40243
POLI	-0.1605	0.999995	2.17148e-06	0.78272	0.40247
ANKRD28	0.10491	0.999995	2.17148e-06	0.41272	0.40645
FAM35A	-0.17507	0.999995	2.17148e-06	0.64644	0.40723
UBE2B	-0.047221	0.999995	2.17148e-06	0.59732	0.40736
SMARCA2	-0.10933	0.999995	2.17148e-06	0.77596	0.40882
MBD4	-0.075092	0.999995	2.17148e-06	0.48774	0.40891
OR1I1	-0.18194	0.999995	2.17148e-06	0.81838	0.41023
PARP9	-0.055643	0.999995	2.17148e-06	0.61984	0.41044
DNA2	-0.12503	0.999995	2.17148e-06	0.82324	0.41074
PAK1	-0.1344	0.999995	2.17148e-06	0.55202	0.41269
RHNO1	-0.10954	0.999995	2.17148e-06	0.65816	0.41559
OR4D1	-0.091587	0.999995	2.17148e-06	0.89846	0.4184
PARP2	-0.032641	0.999995	2.17148e-06	0.96374	0.42131
SFR1	-0.13504	0.999995	2.17148e-06	0.89688	0.42152
MUTYH	-0.1301	0.999995	2.17148e-06	0.53272	0.42316
DBF4	-0.14604	0.999995	2.17148e-06	0.53695	0.4242
CUL5	0.13365	0.999995	2.17148e-06	0.33992	0.4248
DCUN1D5	-0.06092	0.999995	2.17148e-06	0.18647	0.42492
SFPQ	-0.16295	0.999995	2.17148e-06	0.82646	0.42567
PER3	-0.021989	0.999995	2.17148e-06	0.39282	0.42595
RNF111	-0.093025	0.999995	2.17148e-06	0.29871	0.4264
OR6C74	0.1025	0.999995	2.17148e-06	0.39053	0.42868
OR52B6	0.11479	0.999995	2.17148e-06	0.41843	0.43132
MSH6	-0.075667	0.999995	2.17148e-06	0.9256	0.4315
MSH5	-0.11322	0.999995	2.17148e-06	0.80835	0.43164
SUPT4H1	-0.0078245	0.999995	2.17148e-06	0.46007	0.43232
ZBTB32	-0.089879	0.999995	2.17148e-06	0.7907	0.4337
YBX1	0.022106	0.999995	2.17148e-06	0.85422	0.43402
TOP3B	-0.13969	0.999995	2.17148e-06	0.65983	0.43723
DTX3	-0.15349	0.999995	2.17148e-06	0.55469	0.43819
NAE1	-0.081661	0.999995	2.17148e-06	0.9124	0.43842
OR4N5	-0.11389	0.999995	2.17148e-06	0.5098	0.4389
UVRAG	-0.080953	0.999995	2.17148e-06	0.65215	0.43937
C15orf41	-0.014427	0.999995	2.17148e-06	0.39322	0.4401
KAT5	-0.089328	0.999995	2.17148e-06	0.67227	0.44086
MB21D1	-0.065025	0.999995	2.17148e-06	0.41202	0.44441
RBM7	-0.09139	0.999995	2.17148e-06	0.40203	0.44578
RING1	-0.034871	0.999995	2.17148e-06	0.70842	0.44662
ANKRD44	0.0207	0.999995	2.17148e-06	0.59408	0.44843
BRDT	0.030737	0.999995	2.17148e-06	0.42143	0.44846
PINX1	0.019665	0.999995	2.17148e-06	0.33146	0.44871
AKAP8	-0.042428	0.999995	2.17148e-06	0.432	0.45182
HFM1	-0.036149	0.999995	2.17148e-06	0.67589	0.4546
ATF2	0.039327	0.999995	2.17148e-06	0.30829	0.45787
UBE2V1	0.016508	0.999995	2.17148e-06	0.65883	0.46139
EEPD1	-0.010201	0.999995	2.17148e-06	0.75454	0.46292
SAMHD1	0.044488	0.999995	2.17148e-06	0.80149	0.46434
APLF	0.031317	0.999995	2.17148e-06	0.75715	0.46449
C19orf40	-0.040089	0.999995	2.17148e-06	0.83139	0.46475
ZSWIM7	-0.090833	0.999995	2.17148e-06	0.73944	0.46492
OR52B2	0.038576	0.999995	2.17148e-06	0.61466	0.46811
OR1L6	-0.04689	0.999995	2.17148e-06	0.59472	0.46854
MCPH1	-0.091035	0.999995	2.17148e-06	0.94495	0.47273
ID3	-0.016632	0.999995	2.17148e-06	0.52668	0.47304
RAG1	0.045088	0.999995	2.17148e-06	0.33002	0.47337
OR4A5	-0.16754	0.999995	2.17148e-06	0.53496	0.47479
BMI1	0.12044	0.999995	2.17148e-06	0.43832	0.47677
TADA2B	-0.011195	0.999995	2.17148e-06	0.83558	0.47746
OR10V1	0.06964	0.999995	2.17148e-06	0.74915	0.47867
ZNF827	0.17443	0.999995	2.17148e-06	0.29738	0.48158
OR5AR1	0.1102	0.999995	2.17148e-06	0.38027	0.48183
TP73	0.13142	0.999995	2.17148e-06	0.41848	0.48494
MSH2	-0.078425	0.999995	2.17148e-06	0.86422	0.48562
APOBEC3A	-0.022992	0.999995	2.17148e-06	0.20602	0.48875
NFATC2IP	-0.033917	0.999995	2.17148e-06	0.37276	0.48979
SENP7	0.025421	0.999995	2.17148e-06	0.65462	0.49032
APOBEC3C	0.093044	0.999995	2.17148e-06	0.32364	0.49372
PIF1	0.0037239	0.999995	2.17148e-06	0.44774	0.49417
KMT2A	-0.035095	0.999995	2.17148e-06	0.34642	0.49421
OR13J1	-0.094004	0.999995	2.17148e-06	0.8858	0.49635
OR8G5	-0.0049719	0.999995	2.17148e-06	0.62614	0.49742
TRIM29	-0.0059206	0.999995	2.17148e-06	0.76331	0.49805
OR7G3	0.093804	0.999995	2.17148e-06	0.45219	0.49913
Luciferase	0	0.999995	2.17148e-06	0.49992	0.49992
ATRX	-0.079314	0.999995	2.17148e-06	0.76551	0.50284
TPP1	-0.058345	0.999995	2.17148e-06	0.48029	0.50363
TCEA1	-0.008085	0.999995	2.17148e-06	0.53234	0.50513
TEP1	0.047961	0.999995	2.17148e-06	0.69398	0.50684
SMUG1	0.02038	0.999995	2.17148e-06	0.83705	0.50732
TERT	-0.10118	0.999995	2.17148e-06	0.74248	0.5092
L3MBTL1	-0.14421	0.999995	2.17148e-06	0.47551	0.51037
RNF4	0.10979	0.999995	2.17148e-06	0.44573	0.51747
SIRT6	-0.024041	0.999995	2.17148e-06	0.42485	0.5175
AICDA	0.041628	0.999995	2.17148e-06	0.80513	0.51765
UBR5	0.049027	0.999995	2.17148e-06	0.53313	0.51958
CSNK1D	-0.0050639	0.999995	2.17148e-06	0.475	0.52112
WRAP53	0.063121	0.999995	2.17148e-06	0.27163	0.52216
CCNE1	0.02715	0.999995	2.17148e-06	0.79394	0.52253
SCAI	-0.07774	0.999995	2.17148e-06	0.32301	0.53088
XRCC6	0.23689	0.999995	2.17148e-06	0.25447	0.53391
OR2T10	0.028626	0.999995	2.17148e-06	0.66594	0.53427
TIPIN	0.03698	0.999995	2.17148e-06	0.43736	0.53463
RFWD3	-0.097422	0.999995	2.17148e-06	0.92873	0.53927
UHRF2	-0.11768	0.999995	2.17148e-06	0.86653	0.53991
USP47	0.056462	0.999995	2.17148e-06	0.45964	0.54023
OR2B11	0.1562	0.999995	2.17148e-06	0.43177	0.54179
KDM2A	0.020863	0.999995	2.17148e-06	0.40945	0.54303
OR7D4	-0.054323	0.999995	2.17148e-06	0.90353	0.54474
RUVBL2	-0.042663	0.999995	2.17148e-06	0.73864	0.54512
PARP14	0.085141	0.999995	2.17148e-06	0.3376	0.54602
RTEL1	0.023511	0.999995	2.17148e-06	0.81378	0.547
UBE2U	-0.068936	0.999995	2.17148e-06	0.84223	0.54836
GEN1	-0.0053922	0.999995	2.17148e-06	0.80618	0.549
SLX4	-0.022691	0.999995	2.17148e-06	0.78251	0.54903
ALKBH3	-0.0021462	0.999995	2.17148e-06	0.5264	0.54945
OR2L13	-0.068533	0.999995	2.17148e-06	0.75165	0.55075
OBFC1	-0.070428	0.999995	2.17148e-06	0.77075	0.55459
UBC	-0.039693	0.999995	2.17148e-06	0.69438	0.55569
POLR2L	0.15715	0.999995	2.17148e-06	0.44988	0.55639
XRCC6BP1	-0.074958	0.999995	2.17148e-06	0.29882	0.56118
USP26	0.054634	0.999995	2.17148e-06	0.4348	0.56193
HNRNPUL2	0.030795	0.999995	2.17148e-06	0.68812	0.56418
PARG	-0.063464	0.999995	2.17148e-06	0.36823	0.56605
PMP22	-0.064303	0.999995	2.17148e-06	0.19328	0.56765
PPP4R1	-0.017368	0.999995	2.17148e-06	0.81119	0.56861
HDAC10	0.11434	0.999995	2.17148e-06	0.42398	0.56881
OTUB1	-0.03296	0.999995	2.17148e-06	0.82886	0.56982
CXXC1	0.026211	0.999995	2.17148e-06	0.4164	0.57025
BAP1	-0.0028122	0.999995	2.17148e-06	0.33239	0.57133
ERCC6	-0.0078004	0.999995	2.17148e-06	0.56259	0.57346
AMN1	-0.041513	0.999995	2.17148e-06	0.53296	0.57413
SUV420H2	-0.060596	0.999995	2.17148e-06	0.90262	0.57544
OR56A1	-0.087105	0.999995	2.17148e-06	0.45946	0.57674
PAXIP1	-0.1619	0.999995	2.17148e-06	0.80855	0.57786
MMS19	0.037289	0.999995	2.17148e-06	0.51001	0.58031
ERCC2	-0.020327	0.999995	2.17148e-06	0.89676	0.5804
RFC4	-0.034569	0.999995	2.17148e-06	0.73079	0.58214
HMGB2	0.050831	0.999995	2.17148e-06	0.73885	0.58292
OR4K17	0.14955	0.999995	2.17148e-06	0.2861	0.59045
ZNF451	0.10973	0.999995	2.17148e-06	0.40783	0.59158
MTOR	-0.00077563	0.999995	2.17148e-06	0.51454	0.59205
TRRAP	0.0084488	0.999995	2.17148e-06	0.56599	0.59329
BLM	-0.079253	0.999995	2.17148e-06	0.90809	0.59468
MASTL	0.15658	0.999995	2.17148e-06	0.27926	0.59577
OR2L2	0.016803	0.999995	2.17148e-06	0.62258	0.5966
ING4	0.17263	0.999995	2.17148e-06	0.26662	0.59801
ERCC6L	0.090548	0.999995	2.17148e-06	0.49049	0.59939
ASF1A	0.0067028	0.999995	2.17148e-06	0.52315	0.60003
NABP2	0.12252	0.999995	2.17148e-06	0.30263	0.60012
UHRF1	0.04603	0.999995	2.17148e-06	0.50724	0.60056
RPA4	-0.059416	0.999995	2.17148e-06	0.72317	0.60169
OR8U1	0.23927	0.999995	2.17148e-06	0.50488	0.60194
PHF3	-0.039417	0.999995	2.17148e-06	0.83172	0.60442
CDKL5	-0.025282	0.999995	2.17148e-06	0.70937	0.60756
NOTCH1	0.099319	0.999995	2.17148e-06	0.34937	0.60897
MPZ	-0.016307	0.999995	2.17148e-06	0.70116	0.61042
PARP4	-0.071212	0.999995	2.17148e-06	0.83904	0.61099
OR5R1	0.032794	0.999995	2.17148e-06	0.68503	0.61196
NOTCH2	-0.050624	0.999995	2.17148e-06	0.60809	0.61548
PSIP1	0.16956	0.999995	2.17148e-06	0.32014	0.61638
UCHL3	0.031533	0.999995	2.17148e-06	0.47462	0.61654
REV3L	-0.062509	0.999995	2.17148e-06	0.9563	0.61721
BUB1B	0.12811	0.999995	2.17148e-06	0.25488	0.62105
USP3	0.053962	0.999995	2.17148e-06	0.63563	0.62284
FAN1	-0.048421	0.999995	2.17148e-06	0.88735	0.62318
INO80D	0.028515	0.999995	2.17148e-06	0.75635	0.62382
MLH3	0.026501	0.999995	2.17148e-06	0.80894	0.62646
TERF2	0.038104	0.999995	2.17148e-06	0.89088	0.6287
ZRANB3	0.0091686	0.999995	2.17148e-06	0.39414	0.63227
SIRT3	0.012727	0.999995	2.17148e-06	0.71698	0.6334
MDC1	-0.11039	0.999995	2.17148e-06	0.98619	0.63637
OR6K2	-0.033884	0.999995	2.17148e-06	0.75567	0.63764
C10orf12	-0.039048	0.999995	2.17148e-06	0.66275	0.63975
SMARCA4	-0.010965	0.999995	2.17148e-06	0.70519	0.64324
OR6C6	-0.097186	0.999995	2.17148e-06	0.5872	0.6446
OR4D5	0.006477	0.999995	2.17148e-06	0.64946	0.64483
SUV420H1	0.032458	0.999995	2.17148e-06	0.52181	0.64611
NEK11	-0.0046522	0.999995	2.17148e-06	0.44109	0.64706
SETD8	-0.013207	0.999995	2.17148e-06	0.71861	0.64915
H2AFY	0.20681	0.999995	2.17148e-06	0.26262	0.65053
TRIM65	0.014838	0.999995	2.17148e-06	0.67958	0.6518
OR51I2	-0.039462	0.999995	2.17148e-06	0.84145	0.65283
ERCC1	-0.070869	0.999995	2.17148e-06	0.93591	0.653
CDK9	0.05756	0.999995	2.17148e-06	0.45032	0.65354
HERC2	0.27707	0.999995	2.17148e-06	0.30411	0.65355
TYMS	-0.021328	0.999995	2.17148e-06	0.89028	0.65454
FEN1	-0.062836	0.999995	2.17148e-06	0.96609	0.6551
BRCA2	-0.067076	0.999995	2.17148e-06	0.67527	0.65712
FOXN3	-0.031637	0.999995	2.17148e-06	0.66203	0.65748
CCND1	-0.0050375	0.999995	2.17148e-06	0.78419	0.65968
BCLAF1	0.059542	0.999995	2.17148e-06	0.44336	0.66014
OR4C11	0.051601	0.999995	2.17148e-06	0.51196	0.66053
TP63	0.095542	0.999995	2.17148e-06	0.46098	0.66066
OR8D2	0.11672	0.999995	2.17148e-06	0.31394	0.66263
SIRT7	0.10731	0.999995	2.17148e-06	0.31297	0.66545
GTF2H4	-0.073869	0.999995	2.17148e-06	0.80717	0.6655
EME2	0.04305	0.999995	2.17148e-06	0.43176	0.6657
APOBEC3F	0.077528	0.999995	2.17148e-06	0.46469	0.66772
RMI1	-0.0039671	0.999995	2.17148e-06	0.63907	0.66851
RPA2	-0.0093374	0.999995	2.17148e-06	0.85244	0.66963
OR6V1	-0.036932	0.999995	2.17148e-06	0.59582	0.66989
POLR2I	-0.076008	0.999995	2.17148e-06	0.25162	0.67354
SMG1	0.0050272	0.999995	2.17148e-06	0.77125	0.67615
RAD51	0.1989	0.999995	2.17148e-06	0.27691	0.67645
RECQL4	0.0042574	0.999995	2.17148e-06	0.65259	0.67769
SMARCAL1	-0.010286	0.999995	2.17148e-06	0.73835	0.6786
C7orf49	-0.053901	0.999995	2.17148e-06	0.65437	0.6789
CTCF	-0.028476	0.999995	2.17148e-06	0.66418	0.67926
NSMCE4A	0.12927	0.999995	2.17148e-06	0.57723	0.68292
NSMCE2	0.067589	0.999995	2.17148e-06	0.44215	0.68323
CUL2	0.33877	0.999995	2.17148e-06	0.26165	0.68726
OR2T29	0.072535	0.999995	2.17148e-06	0.53086	0.68841
INO80C	0.026364	0.999995	2.17148e-06	0.54644	0.69064
MAPK14	0.12314	0.999995	2.17148e-06	0.5613	0.69131
PSMD14	0.18379	0.999995	2.17148e-06	0.27194	0.69186
SETD2	0.12024	0.999995	2.17148e-06	0.30438	0.69298
COPS2	0.10004	0.999995	2.17148e-06	0.25553	0.69302
SPO11	0.1163	0.999995	2.17148e-06	0.27087	0.69352
CXorf57	0.092013	0.999995	2.17148e-06	0.40709	0.69368
OR10Q1	0.0296	0.999995	2.17148e-06	0.67938	0.69769
HDAC9	-0.0021173	0.999995	2.17148e-06	0.74507	0.69843
EYA3	0.023741	0.999995	2.17148e-06	0.80267	0.69906
ACD	0.0094622	0.999995	2.17148e-06	0.59188	0.69907
FAM175A	0.0065126	0.999995	2.17148e-06	0.80488	0.70052
COPS6	-0.065054	0.999995	2.17148e-06	0.73855	0.70575
OR6K6	0.11869	0.999995	2.17148e-06	0.32531	0.70607
TCEB3	0.20094	0.999995	2.17148e-06	0.32328	0.70755
SETX	0.083401	0.999995	2.17148e-06	0.43474	0.70809
RAD23A	0.084888	0.999995	2.17148e-06	0.36832	0.70972
KAT8	0.16532	0.999995	2.17148e-06	0.33735	0.7105
CIB1	-0.02557	0.999995	2.17148e-06	0.71367	0.71106
POLD4	0.056141	0.999995	2.17148e-06	0.5077	0.71137
CCNB2	-0.055357	0.999995	2.17148e-06	0.79797	0.71155
BRAT1	0.069116	0.999995	2.17148e-06	0.5538	0.71228
POLK	0.093877	0.999995	2.17148e-06	0.61336	0.71381
NELFB	0.15788	0.999995	2.17148e-06	0.41951	0.71646
HDAC3	0.11064	0.999995	2.17148e-06	0.26118	0.71768
RECQL5	0.059938	0.999995	2.17148e-06	0.68363	0.71989
POLR2A	0.017005	0.999995	2.17148e-06	0.43237	0.72034
OR52R1	0.090498	0.999995	2.17148e-06	0.55102	0.72059
SALL4	-0.15173	0.999995	2.17148e-06	0.97737	0.72084
PCID2	0.070362	0.999995	2.17148e-06	0.68366	0.72147
DCUN1D1	0.022437	0.999995	2.17148e-06	0.35587	0.72577
PNKP	0.020452	0.999995	2.17148e-06	0.6799	0.7265
SENP2	0.026315	0.999995	2.17148e-06	0.75141	0.72778
POLE2	0.078904	0.999995	2.17148e-06	0.74945	0.72805
SLX4IP	0.057229	0.999995	2.17148e-06	0.53892	0.72924
HUWE1	-0.086304	0.999995	2.17148e-06	0.76996	0.72935
CCNA2	-0.086011	0.999995	2.17148e-06	0.75452	0.73062
POLM	-0.061443	0.999995	2.17148e-06	0.81326	0.73485
POLD2	0.060183	0.999995	2.17148e-06	0.3599	0.73523
CUL9	0.041956	0.999995	2.17148e-06	0.61092	0.73967
OR6N2	0.021257	0.999995	2.17148e-06	0.66903	0.74056
RTFDC1	0.14018	0.999995	2.17148e-06	0.48401	0.74079
TEN1	0.069908	0.999995	2.17148e-06	0.34857	0.74104
RBBP8	-0.061241	0.999995	2.17148e-06	0.88034	0.74229
POLR2F	0.11203	0.999995	2.17148e-06	0.39736	0.74505
XRCC1	0.025288	0.999995	2.17148e-06	0.71169	0.74687
CHTF18	-0.018911	0.999995	2.17148e-06	0.92822	0.74716
MAD2L2	0.010189	0.999995	2.17148e-06	0.62857	0.74742
SAE1	0.14729	0.999995	2.17148e-06	0.28849	0.74744
C11orf30	-0.063372	0.999995	2.17148e-06	0.76418	0.74964
OR1A2	-0.019325	0.999995	2.17148e-06	0.29789	0.75035
RAD51B	0.026657	0.999995	2.17148e-06	0.81749	0.75129
MAU2	0.25138	0.999995	2.17148e-06	0.29694	0.75367
RNF40	-0.05832	0.999995	2.17148e-06	0.21482	0.7555
OR10G2	-0.03877	0.999995	2.17148e-06	0.66172	0.75696
SUPT6H	0.068114	0.999995	2.17148e-06	0.80424	0.76165
SMARCA5	0.14492	0.999995	2.17148e-06	0.27894	0.76186
NEK6	0.036701	0.999995	2.17148e-06	0.77366	0.76209
MAPKAPK2	-0.013391	0.999995	2.17148e-06	0.77863	0.76525
TCEB2	2.3467e-05	0.999995	2.17148e-06	0.85265	0.7653
PINK1	0.054503	0.999995	2.17148e-06	0.64795	0.7668
FOXM1	0.058947	0.999995	2.17148e-06	0.33275	0.76731
ATR	-0.010125	0.999995	2.17148e-06	0.83929	0.76766
OR5B3	-0.049865	0.999995	2.17148e-06	0.46845	0.7686
RPAIN	0.11597	0.999995	2.17148e-06	0.32793	0.7691
NCAPH2	0.041221	0.999995	2.17148e-06	0.42618	0.76945
SHFM1	0.11639	0.999995	2.17148e-06	0.49952	0.77337
OR5L2	-0.0073082	0.999995	2.17148e-06	0.43286	0.77408
RECQL	0.044835	0.999995	2.17148e-06	0.64306	0.77427
OR6B1	-0.039967	0.999995	2.17148e-06	0.72007	0.77633
SSBP1	0.099736	0.999995	2.17148e-06	0.37224	0.77661
OR5F1	0.21613	0.999995	2.17148e-06	0.32573	0.77886
ALDH2	0.15419	0.999995	2.17148e-06	0.36182	0.78312
DCUN1D2	0.10075	0.999995	2.17148e-06	0.39567	0.78415
OR10AD1	-0.0014347	0.999995	2.17148e-06	0.50754	0.78545
USP48	0.13659	0.999995	2.17148e-06	0.41762	0.78676
TICRR	0.17304	0.999995	2.17148e-06	0.4673	0.79141
DDX1	0.0065262	0.999995	2.17148e-06	0.46278	0.79197
MMS22L	0.17767	0.999995	2.17148e-06	0.30923	0.79394
POLN	0.072744	0.999995	2.17148e-06	0.48953	0.79471
CSNK1E	0.10739	0.999995	2.17148e-06	0.65015	0.79487
ERCC4	-0.0087528	0.999995	2.17148e-06	0.2866	0.79946
SP140	0.067551	0.999995	2.17148e-06	0.59976	0.80088
VCP	0.1105	0.999995	2.17148e-06	0.52894	0.80126
UVSSA	0.23319	0.999995	2.17148e-06	0.30082	0.80139
OR1L4	0.026081	0.999995	2.17148e-06	0.31483	0.80231
OR13A1	0.03145	0.999995	2.17148e-06	0.6996	0.8026
BCCIP	0.08789	0.999995	2.17148e-06	0.61844	0.80385
CUL7	-0.0080145	0.999995	2.17148e-06	0.80438	0.80731
OR6C68	0.064508	0.999995	2.17148e-06	0.61344	0.80804
KAT2A	0.093226	0.999995	2.17148e-06	0.60449	0.80835
SUPT5H	0.068636	0.999995	2.17148e-06	0.43129	0.80911
RNF20	0.085044	0.999995	2.17148e-06	0.33064	0.80957
RASSF7	0.013684	0.999995	2.17148e-06	0.56872	0.81123
INO80B	0.077184	0.999995	2.17148e-06	0.32738	0.81326
NIPBL	0.096073	0.999995	2.17148e-06	0.34102	0.81351
GTF2H3	0.039734	0.999995	2.17148e-06	0.53773	0.8162
CUL4A	0.19711	0.999995	2.17148e-06	0.43222	0.81691
OR2V2	0.037574	0.999995	2.17148e-06	0.62143	0.81864
SMG6	0.025529	0.999995	2.17148e-06	0.4306	0.81881
KAT2B	0.053585	0.999995	2.17148e-06	0.78935	0.81916
POLR2J	0.00092621	0.999995	2.17148e-06	0.80478	0.82311
RAD51AP1	-0.036603	0.999995	2.17148e-06	0.49834	0.82344
PAPD7	0.019554	0.999995	2.17148e-06	0.35353	0.82543
UBE2NL	-0.01661	0.999995	2.17148e-06	0.75935	0.82613
DPY30	0.13608	0.999995	2.17148e-06	0.32922	0.82624
OR8J3	-0.025133	0.999995	2.17148e-06	0.62959	0.82701
APAF1	0.15981	0.999995	2.17148e-06	0.30523	0.82867
PPP5C	0.16507	0.999995	2.17148e-06	0.42435	0.82927
CHAF1B	-0.0081734	0.999995	2.17148e-06	0.82796	0.83006
CUL4B	0.11708	0.999995	2.17148e-06	0.4525	0.83021
PRKDC	0.085984	0.999995	2.17148e-06	0.50723	0.83026
HIPK1	0.22769	0.999995	2.17148e-06	0.26359	0.83074
PIN1	0.038893	0.999995	2.17148e-06	0.71191	0.8308
CEP57	-0.0020868	0.999995	2.17148e-06	0.54555	0.83105
APOBEC2	-0.014662	0.999995	2.17148e-06	0.33791	0.83196
SMC2	0.079996	0.999995	2.17148e-06	0.58354	0.83239
ORC2	0.21017	0.999995	2.17148e-06	0.40347	0.83303
SIRT4	0.067009	0.999995	2.17148e-06	0.50274	0.83478
MCM5	0.091744	0.999995	2.17148e-06	0.53469	0.83658
ZMYND8	0.13149	0.999995	2.17148e-06	0.36325	0.83856
OR1E2	0.0068849	0.999995	2.17148e-06	0.41903	0.84014
CETN2	0.076343	0.999995	2.17148e-06	0.55861	0.84043
BARD1	0.16134	0.999995	2.17148e-06	0.32882	0.84072
POLR2K	0.24757	0.999995	2.17148e-06	0.27211	0.84075
TADA3	0.25417	0.999995	2.17148e-06	0.26616	0.84086
THOC2	0.29612	0.999995	2.17148e-06	0.36396	0.84223
TREX2	0.030637	0.999995	2.17148e-06	0.31689	0.84233
SUMO3	-0.04261	0.999995	2.17148e-06	0.66069	0.84395
TAF9	0.034911	0.999995	2.17148e-06	0.46176	0.84582
NUDT1	0.030579	0.999995	2.17148e-06	0.65535	0.8473
UBE2N	0.04538	0.999995	2.17148e-06	0.83049	0.8481
XRCC3	0.08726	0.999995	2.17148e-06	0.47414	0.8481
ASF1B	0.040424	0.999995	2.17148e-06	0.6932	0.85145
POLG	0.16153	0.999995	2.17148e-06	0.36042	0.85422
DDB2	0.034809	0.999995	2.17148e-06	0.49207	0.85507
GADD45G	0.099577	0.999995	2.17148e-06	0.31516	0.85706
PARK2	0.080772	0.999995	2.17148e-06	0.42508	0.85817
UBA3	0.07471	0.999995	2.17148e-06	0.41157	0.85908
ASH2L	0.16688	0.999995	2.17148e-06	0.38686	0.85939
RNF10	-0.048235	0.999995	2.17148e-06	0.78841	0.86222
SKIV2L2	0.084944	0.999995	2.17148e-06	0.40317	0.86621
HMGA2	0.0032599	0.999995	2.17148e-06	0.86983	0.86689
WDR70	0.092997	0.999995	2.17148e-06	0.36181	0.8685
POLR2D	0.066995	0.999995	2.17148e-06	0.62224	0.86908
OR8K3	0.11425	0.999995	2.17148e-06	0.32253	0.87012
TOP3A	0.19941	0.999995	2.17148e-06	0.2633	0.87211
ETAA1	0.023097	0.999995	2.17148e-06	0.54102	0.87391
KDM4D	0.14147	0.999995	2.17148e-06	0.34168	0.8776
SMC3	0.057304	0.999995	2.17148e-06	0.78275	0.87852
CCND3	0.12554	0.999995	2.17148e-06	0.3918	0.87903
DICER1	-0.0084543	0.999995	2.17148e-06	0.65961	0.87911
POLR2H	0.13895	0.999995	2.17148e-06	0.39526	0.87977
FANCB	0.13538	0.999995	2.17148e-06	0.38371	0.88131
TOPBP1	0.17871	0.999995	2.17148e-06	0.34451	0.88156
ARID2	0.071009	0.999995	2.17148e-06	0.54205	0.88169
UBE2R2	0.0055904	0.999995	2.17148e-06	0.26792	0.88169
SSRP1	0.1003	0.999995	2.17148e-06	0.40938	0.88181
SENP8	0.11369	0.999995	2.17148e-06	0.44131	0.88293
PRPF19	0.074595	0.999995	2.17148e-06	0.54306	0.88308
CDK12	0.00061715	0.999995	2.17148e-06	0.70566	0.88334
USP5	0.013117	0.999995	2.17148e-06	0.60815	0.88647
FANCD2	0.19579	0.999995	2.17148e-06	0.26523	0.88812
CDC25A	0.10268	0.999995	2.17148e-06	0.62532	0.89018
RMI2	0.11687	0.999995	2.17148e-06	0.60549	0.89304
POLR2G	0.095859	0.999995	2.17148e-06	0.44742	0.89322
PRMT8	0.15877	0.999995	2.17148e-06	0.34006	0.89533
OR5L1	0.036531	0.999995	2.17148e-06	0.50944	0.89703
OPRM1	0.12606	0.999995	2.17148e-06	0.3168	0.89753
APEX2	0.092072	0.999995	2.17148e-06	0.58501	0.901
USP14	0.1129	0.999995	2.17148e-06	0.32475	0.90856
CSNK2A2	0.16331	0.999995	2.17148e-06	0.31567	0.90901
KIAA1586	0.083728	0.999995	2.17148e-06	0.35375	0.90915
UBA2	0.053785	0.999995	2.17148e-06	0.54356	0.92217
APOBEC1	0.029638	0.999995	2.17148e-06	0.66227	0.92235
ATRIP	0.062743	0.999995	2.17148e-06	0.53018	0.9259
ATXN7	0.10706	0.999995	2.17148e-06	0.2776	0.92643
CCNA1	0.078987	0.999995	2.17148e-06	0.50076	0.92886
POLD3	0.18166	0.999995	2.17148e-06	0.31158	0.92915
C20orf196	0.25205	0.999995	2.17148e-06	0.36378	0.93014
PPP4R4	0.14588	0.999995	2.17148e-06	0.40678	0.93104
MGMT	0.10561	0.999995	2.17148e-06	0.57776	0.93109
RAD50	0.21623	0.999995	2.17148e-06	0.42974	0.93337
APOBEC3B	0.10579	0.999995	2.17148e-06	0.78447	0.93533
CCNO	0.059865	0.999995	2.17148e-06	0.53547	0.93691
TOP2A	0.15977	0.999995	2.17148e-06	0.34541	0.93699
GADD45A	0.14459	0.999995	2.17148e-06	0.32622	0.94199
ENY2	0.11965	0.999995	2.17148e-06	0.32681	0.94399
SKP1	0.19269	0.999995	2.17148e-06	0.28992	0.95173
COPS4	0.08004	0.999995	2.17148e-06	0.30523	0.95382
PLRG1	0.13295	0.999995	2.17148e-06	0.25949	0.96038
PBRM1	0.017872	0.999995	2.17148e-06	0.76641	0.96065
RPA1	0.15074	0.999995	2.17148e-06	0.34958	0.96914
XRCC5	0.1222	0.999995	2.17148e-06	0.42833	0.97546

## Sheet: This paper, TP53-KO
Gene	lfc	fdr	fdr_log10	pos_p	neg_p
NCAPG2	-1.8187	0.004762	2.32221	1	4.9193e-06
POLR2B	-1.2386	0.007937	2.10034	1	2.4597e-05
PRPF19	-1.5437	0.007937	2.10034	1	2.4597e-05
MCM3	-1.6351	0.017857	1.74819	0.99998	7.379e-05
UBA1	-2.0013	0.018095	1.74244	0.98896	9.3467e-05
EP400	-1.0464	0.019841	1.70244	0.99997	0.00012298
DNA2	-1.2617	0.030612	1.51411	0.9995	0.00022137
CCND1	-1.3864	0.048214	1.31683	0.99992	0.00039847
POLR2E	-1.4536	0.06619	1.17921	0.99981	0.00067395
POLR2L	-1.7898	0.06619	1.17921	0.98451	0.00068379
SMC3	-1.0558	0.071429	1.14613	0.99969	0.00096911
SMC1A	-0.80678	0.071429	1.14613	0.99974	0.0012446
POLR2C	-1.241	0.071429	1.14613	0.99954	0.0013135
DCLRE1B	-0.76281	0.071429	1.14613	0.99971	0.0013528
TOP2A	-0.84984	0.071429	1.14613	0.99971	0.0013627
PNKP	-0.45286	0.071429	1.14613	0.9488	0.0013823
SMG1	-1.3872	0.071429	1.14613	0.99947	0.0014709
MAU2	-1.3689	0.071429	1.14613	0.99946	0.0015004
GPS1	-1.1772	0.071429	1.14613	0.99943	0.0016381
POLR2J	-1.4191	0.071429	1.14613	0.99756	0.0016381
TERF2	-1.0236	0.071429	1.14613	0.99696	0.0016381
THOC2	-1.6733	0.071429	1.14613	0.99912	0.0017168
TELO2	-1.6185	0.071429	1.14613	0.94652	0.0017365
PSMD14	-0.91695	0.071429	1.14613	0.99961	0.0017956
ERCC3	-1.1877	0.071429	1.14613	0.9994	0.0018447
PLRG1	-1.1812	0.077011	1.11345	0.95651	0.0021006
CDK4	-1.5663	0.077011	1.11345	0.99923	0.0021694
SUPT6H	-1.1566	0.077011	1.11345	0.99919	0.0022776
POLE	-1.0082	0.077011	1.11345	0.99918	0.0023072
MCM5	-1.1092	0.086358	1.0637	0.95553	0.002681
TOP1	-0.25613	0.086358	1.0637	0.99116	0.0029565
TTI2	-1.7819	0.086358	1.0637	0.99853	0.002986
MYBBP1A	-1.1553	0.086358	1.0637	0.98825	0.0030155
UPF1	-1.3729	0.086358	1.0637	0.93606	0.0031828
CCNA2	-1.2754	0.086358	1.0637	0.99947	0.0032418
MCM2	-1.0265	0.086358	1.0637	0.99875	0.0032517
DNMT1	-0.99097	0.086358	1.0637	0.96539	0.0033009
RAD51	-0.92898	0.087921	1.05591	0.9986	0.0035468
POLD2	-0.88847	0.087921	1.05591	0.99859	0.0035862
RPA1	-0.82496	0.087921	1.05591	0.98403	0.0036452
GPI	-1.0476	0.087921	1.05591	0.86442	0.0037239
THOC1	-0.86235	0.089229	1.04949	0.99843	0.0038715
NDNL2	-1.2593	0.094906	1.02271	0.99813	0.0042159
RUVBL1	-1.4696	0.096353	1.01613	0.98824	0.004452
POLR2H	-1.4622	0.096353	1.01613	0.98263	0.0045602
CHAF1B	-1.129	0.096353	1.01613	0.99815	0.0046389
SOD1	-1.0719	0.096353	1.01613	0.99953	0.0046783
RAD51D	-1.2276	0.097718	1.01003	0.9981	0.0048455
RRM2	-0.88933	0.112439	0.949083	0.99782	0.0056917
USP5	-0.70338	0.113238	0.946008	0.97335	0.0058491
HUWE1	-0.77782	0.121337	0.916007	0.99975	0.0065083
MMS19	-0.71025	0.121337	0.916007	0.99756	0.0065181
NHP2	-0.94131	0.141534	0.849139	0.99938	0.0077873
RFC3	-0.98986	0.141534	0.849139	0.98651	0.0078955
KAT8	-1.1587	0.142251	0.846945	0.99526	0.0080824
VCP	-0.97664	0.188861	0.723858	0.98791	0.010926
CDCA5	-0.88301	0.192231	0.716177	0.99912	0.011319
PPP4C	-0.90856	0.198768	0.701654	0.99262	0.01191
DDX1	-1.1739	0.251412	0.599614	0.98309	0.015324
ACTL6A	-0.81024	0.256746	0.590496	0.99953	0.015914
PLK1	-0.8966	0.262207	0.581356	0.99237	0.016829
MCM6	-0.26384	0.262207	0.581356	0.96672	0.016967
TRRAP	-1.1472	0.262207	0.581356	0.98608	0.017065
NCAPD3	-1.1395	0.270842	0.567284	0.98924	0.017921
RNF113A	-1.0149	0.270842	0.567284	0.99029	0.018187
ERCC2	-0.84773	0.288817	0.539377	0.9928	0.019692
SETDB1	-0.71533	0.320185	0.494599	0.93967	0.022162
POLR2I	-1.036	0.34909	0.457063	0.99497	0.024523
NPM1	-0.86967	0.352177	0.453239	0.65842	0.02533
UBC	-0.71132	0.352177	0.453239	0.99857	0.025467
EIF4A1	-1.0159	0.356151	0.448366	0.98639	0.026205
POLR2A	-0.7954	0.356151	0.448366	0.99876	0.026491
RFC4	-0.68015	0.358413	0.445616	0.99665	0.027297
XRCC5	-0.7904	0.358413	0.445616	0.74041	0.027661
WDR70	-0.46877	0.358413	0.445616	0.98971	0.02777
UBE2N	-0.77169	0.36221	0.44104	0.99537	0.028832
MASTL	-0.91741	0.36221	0.44104	0.99947	0.028891
HMGA1	-0.64478	0.36221	0.44104	0.79579	0.029186
GTF2H4	-0.9587	0.373297	0.427946	0.96721	0.030465
TOPBP1	-0.92705	0.411369	0.385768	0.61023	0.033997
RTFDC1	-1.064	0.415697	0.381223	0.98056	0.034785
ORC2	-0.90548	0.458246	0.338901	0.38338	0.038818
SFPQ	-0.86516	0.505159	0.296572	0.99405	0.043826
SUPT5H	-0.70686	0.505159	0.296572	0.96737	0.043836
CTC1	-0.6955	0.508915	0.293355	0.99875	0.045125
CDK7	-0.85061	0.508915	0.293355	0.80273	0.045213
NELFB	-0.80932	0.515873	0.287457	0.41547	0.046365
DROSHA	-0.84013	0.522579	0.281848	0.98315	0.04789
COPS5	-0.83972	0.522579	0.281848	0.95683	0.048047
SMC2	-0.83239	0.540159	0.267478	0.9903	0.050221
HNRNPK	-0.81935	0.551805	0.258214	0.99485	0.051874
MNAT1	-0.81656	0.564337	0.248461	0.81177	0.053635
TICRR	-0.82466	0.56554	0.247537	0.82621	0.054334
FAM178A	-0.79591	0.585056	0.232803	0.97039	0.056813
POLD3	-0.7941	0.585815	0.23224	0.58898	0.057492
WAPAL	-0.62542	0.607391	0.216532	0.41605	0.060237
NCAPG	-0.42276	0.634315	0.197695	0.9882	0.063563
TAF1	-1.0416	0.636219	0.196393	0.93587	0.064812
METTL3	-0.56756	0.636219	0.196393	0.99015	0.065068
MCM7	-0.49551	0.658497	0.181446	0.97201	0.068462
CHAF1A	-0.59602	0.658497	0.181446	0.96983	0.069013
COPS3	-0.75229	0.658497	0.181446	0.83701	0.069387
SUPT16H	-0.72824	0.661141	0.179706	0.98153	0.070587
DDB1	-0.72991	0.661141	0.179706	0.98533	0.07165
UBA2	-0.60648	0.661141	0.179706	0.81441	0.071778
HINFP	-0.72923	0.661141	0.179706	0.97761	0.072398
POLR2D	-0.72244	0.661643	0.179376	0.99522	0.073372
CUL2	-0.72164	0.661643	0.179376	0.76736	0.074198
YBX1	-0.72285	0.661643	0.179376	0.99349	0.074503
NCAPD2	-0.65936	0.667139	0.175784	0.97243	0.076156
ACD	-0.71822	0.667139	0.175784	0.95169	0.0765
XRCC3	-0.71603	0.674277	0.171162	0.95926	0.078016
CUL1	-0.70879	0.683397	0.165327	0.87622	0.079777
UHRF1	-0.6886	0.714912	0.145747	0.96479	0.084194
NCAPH2	-0.68574	0.716215	0.144957	0.77263	0.085424
MCM3AP	-0.68571	0.716215	0.144957	0.98423	0.085827
TEN1	-0.67941	0.72092	0.142113	0.99543	0.087136
BARD1	-0.64191	0.721671	0.141661	0.99706	0.087972
XAB2	-0.6717	0.72521	0.139536	0.99032	0.089153
DUT	-0.63569	0.733295	0.134721	0.98666	0.091337
TCEB3	-0.75963	0.733295	0.134721	0.92469	0.092646
POLE2	-0.65592	0.733295	0.134721	0.99597	0.092675
GAR1	-0.64704	0.733295	0.134721	0.88821	0.093649
GTF2H2	-0.64892	0.733295	0.134721	0.89221	0.093934
COPS6	-0.64924	0.733829	0.134405	0.9936	0.094761
ATR	-0.59263	0.742063	0.129559	0.98412	0.096591
RPA2	-0.35117	0.770137	0.113432	0.46918	0.10155
ECT2	-0.34492	0.770137	0.113432	0.37131	0.10255
NOP10	-0.64534	0.770137	0.113432	0.99802	0.10263
POLR2K	-0.83849	0.795788	0.0992026	0.96581	0.10687
CHTF18	-0.39795	0.825554	0.0832545	0.99447	0.11172
TIPIN	-0.66551	0.831421	0.080179	0.97394	0.11338
NSMCE4A	-0.41711	0.84121	0.0750956	0.64455	0.11558
INO80	-0.66109	0.843242	0.0740478	0.99794	0.118
TONSL	-0.41855	0.843242	0.0740478	0.34103	0.118
SAE1	-0.48839	0.843242	0.0740478	0.59151	0.11847
RNF4	-0.46703	0.849114	0.071034	0.25773	0.12017
RAD9A	-0.42766	0.877329	0.0568375	0.93249	0.12507
SLX4	-0.57327	0.885132	0.052992	0.9318	0.1271
KAT5	-0.61537	0.88983	0.050693	0.98539	0.12869
RAD21	-0.48364	0.929007	0.031981	0.87564	0.13589
POT1	-0.48507	0.929007	0.031981	0.98888	0.13628
SKP1	-0.48699	0.94461	0.0247475	0.7341	0.13985
HMGA2	-0.36994	0.94461	0.0247475	0.71972	0.14052
SERBP1	-0.61762	0.955977	0.0195526	0.99609	0.14455
USP37	-0.52897	0.955977	0.0195526	0.97424	0.14492
XRCC6	-0.35075	0.955977	0.0195526	0.95542	0.14517
HDAC3	-0.58408	0.965197	0.015384	0.99711	0.14846
OR1E1	-0.55688	0.965197	0.015384	0.86535	0.14857
POLD1	-0.24662	0.974759	0.0111027	0.80799	0.15143
RECQL4	-0.50722	0.974759	0.0111027	0.91707	0.15283
UVRAG	-0.47554	0.974759	0.0111027	0.9771	0.15311
RTF1	-0.63472	0.974759	0.0111027	0.99822	0.15407
POLR2F	-0.38551	0.9811	0.00828672	0.97308	0.15675
RNF20	-0.56517	0.9811	0.00828672	0.99731	0.15733
HUS1	-0.12572	0.9811	0.00828672	0.27021	0.15815
POLH	-0.35686	0.9811	0.00828672	0.70552	0.1596
TOP3A	-0.59952	0.9811	0.00828672	0.99569	0.16076
CHEK1	-0.55603	0.9811	0.00828672	0.88712	0.16217
GTF2H1	-0.13782	0.9811	0.00828672	0.75797	0.16269
BCAS2	-0.28245	0.9811	0.00828672	0.96844	0.16318
TIMELESS	-0.48172	0.992141	0.0034266	0.98659	0.16617
USP20	-0.46184	0.992141	0.0034266	0.71832	0.16707
BCCIP	-0.35424	0.993641	0.0027705	0.29874	0.16834
ERCC1	-0.38583	0.999995	2.17148e-06	0.98756	0.17139
KDM2A	-0.57034	0.999995	2.17148e-06	0.99358	0.17261
MCRS1	-0.49098	0.999995	2.17148e-06	0.94122	0.18046
CSNK2B	-0.09821	0.999995	2.17148e-06	0.89061	0.18098
SSRP1	-0.45773	0.999995	2.17148e-06	0.9904	0.18113
TERF2IP	0.11162	0.999995	2.17148e-06	0.72277	0.1832
SMC4	-0.23451	0.999995	2.17148e-06	0.79153	0.18383
MAD2L2	-0.47377	0.999995	2.17148e-06	0.98005	0.18771
SKIV2L2	-0.27525	0.999995	2.17148e-06	0.83222	0.18963
PCNA	-0.32914	0.999995	2.17148e-06	0.83024	0.19161
RUVBL2	-0.58056	0.999995	2.17148e-06	0.93393	0.19165
BEND3	-0.38443	0.999995	2.17148e-06	0.97462	0.19228
ACTR8	-0.38952	0.999995	2.17148e-06	0.87835	0.19737
TINF2	-0.34213	0.999995	2.17148e-06	0.59451	0.19835
DKC1	-0.64785	0.999995	2.17148e-06	0.96388	0.19971
SMC5	-0.0875	0.999995	2.17148e-06	0.9596	0.20013
RAD50	0.22098	0.999995	2.17148e-06	0.28189	0.20163
MTOR	-0.43326	0.999995	2.17148e-06	0.92253	0.20289
PAXIP1	-0.23317	0.999995	2.17148e-06	0.39908	0.21535
PRMT1	-0.61382	0.999995	2.17148e-06	0.96051	0.21747
RFC1	-0.2559	0.999995	2.17148e-06	0.92651	0.21794
SMARCB1	-0.48792	0.999995	2.17148e-06	0.96119	0.21908
RAD23A	-0.34133	0.999995	2.17148e-06	0.69319	0.22563
RNF8	-0.16806	0.999995	2.17148e-06	0.51285	0.2265
UBE2NL	0.23919	0.999995	2.17148e-06	0.57276	0.22723
APEX2	-0.38125	0.999995	2.17148e-06	0.97667	0.23201
CCNO	-0.25978	0.999995	2.17148e-06	0.83112	0.23384
RNF40	-0.11552	0.999995	2.17148e-06	0.85505	0.23823
UBE2I	-0.3769	0.999995	2.17148e-06	0.78114	0.23873
PCID2	-0.32108	0.999995	2.17148e-06	0.85673	0.24606
NIPBL	-0.44426	0.999995	2.17148e-06	0.9189	0.24655
MCM4	-0.39623	0.999995	2.17148e-06	0.76155	0.25045
OR10Z1	0.47657	0.999995	2.17148e-06	0.17481	0.25113
TAF1L	-0.53428	0.999995	2.17148e-06	0.9983	0.25374
WEE1	-0.055687	0.999995	2.17148e-06	0.21399	0.25681
TADA3	-0.25228	0.999995	2.17148e-06	0.82574	0.2574
CCNH	-0.41652	0.999995	2.17148e-06	0.97658	0.25982
ATMIN	-0.39656	0.999995	2.17148e-06	0.099631	0.25993
FANCC	-0.24011	0.999995	2.17148e-06	0.21218	0.26079
SETD2	-0.30618	0.999995	2.17148e-06	0.71919	0.26383
C19orf40	-0.25498	0.999995	2.17148e-06	0.92169	0.26588
FAM35A	-0.11666	0.999995	2.17148e-06	0.90907	0.26662
CBX4	0.079643	0.999995	2.17148e-06	0.44999	0.26815
SF3B1	-0.31714	0.999995	2.17148e-06	0.25874	0.27204
BUB1B	-0.61455	0.999995	2.17148e-06	0.58265	0.27265
MMS22L	-0.40777	0.999995	2.17148e-06	0.85384	0.27322
ACTR5	-0.57691	0.999995	2.17148e-06	0.96903	0.27367
SIN3A	0.19248	0.999995	2.17148e-06	0.35773	0.2759
ATAD5	0.0095348	0.999995	2.17148e-06	0.79783	0.27723
HIPK1	-0.2204	0.999995	2.17148e-06	0.8802	0.27914
POLG2	-0.10658	0.999995	2.17148e-06	0.27055	0.27917
ERCC6L	-0.34859	0.999995	2.17148e-06	0.92896	0.28169
RNASEH2A	-0.56424	0.999995	2.17148e-06	0.96995	0.28541
COPS8	-0.32686	0.999995	2.17148e-06	0.80819	0.28578
BRIP1	-0.47915	0.999995	2.17148e-06	0.58003	0.28909
SETMAR	-0.21877	0.999995	2.17148e-06	0.35217	0.29117
BAP1	-0.45666	0.999995	2.17148e-06	0.81647	0.29247
ATRIP	-0.27596	0.999995	2.17148e-06	0.98992	0.29428
CDC25B	-0.29156	0.999995	2.17148e-06	0.94807	0.29462
CLSPN	-0.43597	0.999995	2.17148e-06	0.98065	0.29571
MTA2	-0.19818	0.999995	2.17148e-06	0.8613	0.29652
KMT2A	-0.10052	0.999995	2.17148e-06	0.86662	0.30339
SLBP	-0.4465	0.999995	2.17148e-06	0.98901	0.30408
CDC5L	-0.53889	0.999995	2.17148e-06	0.99002	0.30939
ID3	-0.22531	0.999995	2.17148e-06	0.68825	0.31328
DDX11	-0.55418	0.999995	2.17148e-06	0.99636	0.31461
RTEL1	-0.26019	0.999995	2.17148e-06	0.85548	0.31586
RPAIN	-0.27463	0.999995	2.17148e-06	0.91646	0.3175
TRAIP	-0.37367	0.999995	2.17148e-06	0.85613	0.31908
OTUB1	-0.54332	0.999995	2.17148e-06	0.84656	0.32052
BPTF	-0.15211	0.999995	2.17148e-06	0.41373	0.32186
NUDT16L1	-0.25176	0.999995	2.17148e-06	0.90483	0.32299
SETD8	-0.38421	0.999995	2.17148e-06	0.96681	0.32395
ARID1B	-0.4687	0.999995	2.17148e-06	0.55534	0.32589
TTI1	-0.4	0.999995	2.17148e-06	0.92241	0.32731
PARP14	-0.15115	0.999995	2.17148e-06	0.51944	0.32871
TCEA1	0.058091	0.999995	2.17148e-06	0.34478	0.33101
C20orf196	-0.12627	0.999995	2.17148e-06	0.91724	0.33266
POLE4	-0.25247	0.999995	2.17148e-06	0.84273	0.33739
RAD17	-0.36196	0.999995	2.17148e-06	0.53139	0.33862
OR10H5	-0.36992	0.999995	2.17148e-06	0.9215	0.34123
C17orf70	-0.11019	0.999995	2.17148e-06	0.42994	0.34285
NSMCE2	-0.32786	0.999995	2.17148e-06	0.98061	0.34614
MCM10	0.062804	0.999995	2.17148e-06	0.76844	0.34689
UBR5	-0.11729	0.999995	2.17148e-06	0.8596	0.35126
OR2T35	-0.49054	0.999995	2.17148e-06	0.49788	0.35273
SIRT2	-0.22676	0.999995	2.17148e-06	0.83779	0.35339
NOTCH2	-0.16229	0.999995	2.17148e-06	0.60151	0.3558
OR10AD1	-0.0043098	0.999995	2.17148e-06	0.537	0.35802
RIF1	-0.080832	0.999995	2.17148e-06	0.35942	0.36144
EEPD1	-0.19336	0.999995	2.17148e-06	0.54038	0.36174
BRAT1	-0.3281	0.999995	2.17148e-06	0.89088	0.36186
USP48	-0.012334	0.999995	2.17148e-06	0.18476	0.36374
DICER1	-0.35304	0.999995	2.17148e-06	0.80286	0.36574
FOXM1	-0.44832	0.999995	2.17148e-06	0.97238	0.36641
UBE2C	-0.11679	0.999995	2.17148e-06	0.2828	0.36691
RBBP8	-0.52815	0.999995	2.17148e-06	0.97627	0.37294
SENP6	-0.4097	0.999995	2.17148e-06	0.94321	0.37377
USP13	-0.17351	0.999995	2.17148e-06	0.5742	0.37739
FZR1	-0.32204	0.999995	2.17148e-06	0.91558	0.37887
CDK2	-0.54853	0.999995	2.17148e-06	0.89151	0.38069
CCND3	-0.18811	0.999995	2.17148e-06	0.92686	0.38414
RAD1	0.16102	0.999995	2.17148e-06	0.29975	0.38939
UBE2D3	-0.15818	0.999995	2.17148e-06	0.51841	0.39569
OR52H1	0.31886	0.999995	2.17148e-06	0.046119	0.39846
H3F3B	-0.40367	0.999995	2.17148e-06	0.28786	0.39988
MCPH1	-0.083694	0.999995	2.17148e-06	0.79161	0.40022
RRM1	-0.42281	0.999995	2.17148e-06	0.99142	0.40397
OR9I1	-0.090169	0.999995	2.17148e-06	0.50548	0.40567
C9orf142	-0.40634	0.999995	2.17148e-06	0.70934	0.40643
CDC25A	-0.40934	0.999995	2.17148e-06	0.91343	0.40814
RINN1	-0.0018681	0.999995	2.17148e-06	0.85218	0.40868
IP6K3	0.19334	0.999995	2.17148e-06	0.11559	0.41306
FEN1	-0.4676	0.999995	2.17148e-06	0.99392	0.41408
OR9G1	-0.26409	0.999995	2.17148e-06	0.72843	0.41563
PRDM10	-0.092536	0.999995	2.17148e-06	0.92625	0.41572
BRD2	-0.33405	0.999995	2.17148e-06	0.96232	0.4164
CXorf57	-0.21244	0.999995	2.17148e-06	0.79887	0.41751
EME2	-0.17946	0.999995	2.17148e-06	0.98445	0.41804
TRIM28	-0.15335	0.999995	2.17148e-06	0.82783	0.41834
H2AFY	-0.12058	0.999995	2.17148e-06	0.60774	0.41845
NCAPH	-0.39984	0.999995	2.17148e-06	0.90869	0.42096
WRAP53	-0.42653	0.999995	2.17148e-06	0.96591	0.42174
XPC	-0.027749	0.999995	2.17148e-06	0.36701	0.42231
RAD51AP1	0.052136	0.999995	2.17148e-06	0.13649	0.42364
UBE2K	-0.072736	0.999995	2.17148e-06	0.49903	0.42463
SMARCA2	0.28692	0.999995	2.17148e-06	0.53529	0.42481
SMARCC2	-0.17362	0.999995	2.17148e-06	0.89503	0.42603
REV3L	-0.47949	0.999995	2.17148e-06	0.99639	0.42623
OR8G2	0.18155	0.999995	2.17148e-06	0.50632	0.43257
MEN1	-0.16558	0.999995	2.17148e-06	0.85458	0.43325
CDKL5	-0.056191	0.999995	2.17148e-06	0.47727	0.43367
FOXO3	0.29342	0.999995	2.17148e-06	0.12744	0.43434
OBFC1	-0.30417	0.999995	2.17148e-06	0.90371	0.43475
GABBR1	-0.10755	0.999995	2.17148e-06	0.60951	0.43494
USP10	-0.13888	0.999995	2.17148e-06	0.94365	0.43618
ZBTB32	-0.25682	0.999995	2.17148e-06	0.70504	0.43685
CHD4	-0.50709	0.999995	2.17148e-06	0.75274	0.43762
NSMCE1	-0.13969	0.999995	2.17148e-06	0.72669	0.43823
PPP4R2	-0.02817	0.999995	2.17148e-06	0.72425	0.43892
INO80B	-0.48235	0.999995	2.17148e-06	0.96747	0.44115
USP14	0.25873	0.999995	2.17148e-06	0.27882	0.44266
APOBEC3G	-0.15394	0.999995	2.17148e-06	0.18397	0.44372
NFRKB	-0.27158	0.999995	2.17148e-06	0.89006	0.44558
FANCM	-0.34639	0.999995	2.17148e-06	0.91306	0.44575
PDS5A	-0.18002	0.999995	2.17148e-06	0.27824	0.44619
BRD8	-0.13302	0.999995	2.17148e-06	0.79663	0.44684
FANCG	-0.18194	0.999995	2.17148e-06	0.79008	0.4508
UBE2M	0.095016	0.999995	2.17148e-06	0.46158	0.45193
UBE2T	-0.16997	0.999995	2.17148e-06	0.77412	0.45229
ANKRD52	0.33019	0.999995	2.17148e-06	0.51725	0.45235
POLN	0.038235	0.999995	2.17148e-06	0.061408	0.45457
HMGN1	-0.24282	0.999995	2.17148e-06	0.87782	0.45537
OR52I1	0.32868	0.999995	2.17148e-06	0.47331	0.45574
PALB2	-0.089909	0.999995	2.17148e-06	0.61604	0.45704
POLA1	-0.44737	0.999995	2.17148e-06	0.92969	0.45767
SIRT7	-0.286	0.999995	2.17148e-06	0.91428	0.46221
POLB	0.24841	0.999995	2.17148e-06	0.20604	0.46401
DTX2	0.073523	0.999995	2.17148e-06	0.20089	0.46517
APOBEC3B	0.092628	0.999995	2.17148e-06	0.6675	0.46889
ENY2	-0.20389	0.999995	2.17148e-06	0.81942	0.46918
RBX1	-0.33047	0.999995	2.17148e-06	0.94263	0.46983
USP47	-0.016952	0.999995	2.17148e-06	0.52681	0.47283
POLQ	-0.25148	0.999995	2.17148e-06	0.38997	0.47385
CCDC101	-0.24984	0.999995	2.17148e-06	0.67882	0.47903
XRCC1	-0.16132	0.999995	2.17148e-06	0.79857	0.47951
NABP1	0.033177	0.999995	2.17148e-06	0.39948	0.48122
SHFM1	0.065999	0.999995	2.17148e-06	0.25068	0.48181
CDK9	-0.19894	0.999995	2.17148e-06	0.95163	0.48405
OR56A3	-0.026628	0.999995	2.17148e-06	0.70215	0.48428
PINK1	-0.37658	0.999995	2.17148e-06	0.78056	0.48489
SMEK2	-0.015304	0.999995	2.17148e-06	0.80952	0.48619
MAPK14	0.070413	0.999995	2.17148e-06	0.79453	0.49076
RFC2	-0.34307	0.999995	2.17148e-06	0.90854	0.49332
SMG6	-0.55881	0.999995	2.17148e-06	0.96264	0.496
HNRNPUL2	0.133	0.999995	2.17148e-06	0.41705	0.49615
Luciferase	0	0.999995	2.17148e-06	0.49992	0.49992
SUMO4	-0.21989	0.999995	2.17148e-06	0.21671	0.50693
SMC1B	0.26122	0.999995	2.17148e-06	0.083604	0.50738
PAK1	0.023139	0.999995	2.17148e-06	0.3708	0.51038
NAE1	-0.31286	0.999995	2.17148e-06	0.97257	0.51099
KDM4A	-0.11758	0.999995	2.17148e-06	0.89739	0.51168
LIG1	0.012736	0.999995	2.17148e-06	0.42132	0.5125
CUL4A	-0.23981	0.999995	2.17148e-06	0.90568	0.51428
PPP4R4	0.14992	0.999995	2.17148e-06	0.66013	0.51517
OR2V2	-0.15371	0.999995	2.17148e-06	0.62673	0.51673
XRCC2	-0.061791	0.999995	2.17148e-06	0.57992	0.51707
UBE2S	-0.13008	0.999995	2.17148e-06	0.75152	0.51785
NABP2	0.27876	0.999995	2.17148e-06	0.1992	0.51841
MSH3	0.34981	0.999995	2.17148e-06	0.15917	0.52129
LIG3	0.31312	0.999995	2.17148e-06	0.48942	0.5232
FANCF	-0.16742	0.999995	2.17148e-06	0.24406	0.5243
NOTCH1	0.12868	0.999995	2.17148e-06	0.15711	0.52597
CSNK2A2	-0.27639	0.999995	2.17148e-06	0.5873	0.52605
CCND2	-0.028255	0.999995	2.17148e-06	0.39528	0.5296
OR11H1	-0.39665	0.999995	2.17148e-06	0.92877	0.53474
SUMO2	0.021589	0.999995	2.17148e-06	0.60757	0.53529
HERC2	-0.30596	0.999995	2.17148e-06	0.97347	0.53583
APOBEC3H	-0.14154	0.999995	2.17148e-06	0.86324	0.53765
OR56A1	0.27568	0.999995	2.17148e-06	0.47088	0.5393
FAM122A	-0.29936	0.999995	2.17148e-06	0.92725	0.54034
CDKN1B	-0.080685	0.999995	2.17148e-06	0.86005	0.54146
SET	0.094449	0.999995	2.17148e-06	0.17364	0.54222
PPP6R3	0.11422	0.999995	2.17148e-06	0.45476	0.54265
RAD51B	0.17766	0.999995	2.17148e-06	0.32748	0.54429
TPP1	0.25613	0.999995	2.17148e-06	0.52536	0.5448
RNF126	-0.19757	0.999995	2.17148e-06	0.32604	0.54692
GTF2H5	-0.21666	0.999995	2.17148e-06	0.89725	0.54694
EYA2	-0.14756	0.999995	2.17148e-06	0.93939	0.54746
SPRTN	-0.27083	0.999995	2.17148e-06	0.97323	0.54896
CLK2	0.08757	0.999995	2.17148e-06	0.54694	0.54949
NLK	0.25031	0.999995	2.17148e-06	0.43965	0.5559
FANCE	0.12034	0.999995	2.17148e-06	0.58046	0.5592
APBB1	-0.056795	0.999995	2.17148e-06	0.77232	0.56195
OR4N5	0.0086431	0.999995	2.17148e-06	0.5299	0.56373
APOBEC3F	0.093655	0.999995	2.17148e-06	0.29892	0.56469
GTF2H3	-0.09091	0.999995	2.17148e-06	0.2827	0.56529
OR4F21	-0.30609	0.999995	2.17148e-06	0.86515	0.56574
TCOF1	-0.36579	0.999995	2.17148e-06	0.96165	0.5668
UCHL5	0.014847	0.999995	2.17148e-06	0.67577	0.56806
DSCC1	0.10621	0.999995	2.17148e-06	0.18692	0.56895
DCLRE1A	0.36607	0.999995	2.17148e-06	0.36625	0.56955
OR8J3	-0.32285	0.999995	2.17148e-06	0.59216	0.57047
SMARCE1	0.21164	0.999995	2.17148e-06	0.16951	0.57105
PRKDC	-0.28288	0.999995	2.17148e-06	0.99111	0.57148
MCM9	-0.02826	0.999995	2.17148e-06	0.63493	0.57187
SSBP3	-0.47751	0.999995	2.17148e-06	0.9913	0.5725
TREX2	0.40819	0.999995	2.17148e-06	0.14499	0.57465
PPP5C	0.011878	0.999995	2.17148e-06	0.63886	0.57671
NEK6	-0.21206	0.999995	2.17148e-06	0.68538	0.57732
USP34	0.0014236	0.999995	2.17148e-06	0.4434	0.57737
EYA1	-0.14146	0.999995	2.17148e-06	0.22717	0.57839
SUPT4H1	-0.11021	0.999995	2.17148e-06	0.96582	0.57932
DCLRE1C	0.51546	0.999995	2.17148e-06	0.13335	0.58161
RAD51C	0.0182	0.999995	2.17148e-06	0.76296	0.58303
C1orf115	-0.17073	0.999995	2.17148e-06	0.79854	0.58308
TERF1	-0.23484	0.999995	2.17148e-06	0.93323	0.58356
CBX5	-0.024331	0.999995	2.17148e-06	0.84118	0.58369
SMARCA5	-0.2913	0.999995	2.17148e-06	0.38322	0.58444
WDR76	-0.010298	0.999995	2.17148e-06	0.23868	0.58467
DAXX	-0.22671	0.999995	2.17148e-06	0.63651	0.58558
RAD54L	-0.059623	0.999995	2.17148e-06	0.85191	0.58686
CDK1	-0.27241	0.999995	2.17148e-06	0.94101	0.5869
PNN	-0.26774	0.999995	2.17148e-06	0.72852	0.58879
BRCA1	0.045897	0.999995	2.17148e-06	0.83954	0.59063
BAZ1B	0.26232	0.999995	2.17148e-06	0.27795	0.59085
MSH5	-0.12288	0.999995	2.17148e-06	0.89695	0.59158
RFC5	-0.28795	0.999995	2.17148e-06	0.95542	0.59208
UVSSA	0.043933	0.999995	2.17148e-06	0.84512	0.59279
MRE11A	-0.040693	0.999995	2.17148e-06	0.32226	0.59336
NEK1	0.19485	0.999995	2.17148e-06	0.29592	0.59398
ERCC4	-0.31636	0.999995	2.17148e-06	0.91074	0.59459
YTHDF2	-0.2214	0.999995	2.17148e-06	0.88969	0.59508
ZRANB3	-0.075141	0.999995	2.17148e-06	0.26076	0.59854
CDC7	-0.25271	0.999995	2.17148e-06	0.98242	0.59931
MTA3	0.1017	0.999995	2.17148e-06	0.62526	0.59967
OR11H6	0.060148	0.999995	2.17148e-06	0.43992	0.60046
NONO	-0.048503	0.999995	2.17148e-06	0.62096	0.60303
H2AFZ	0.15559	0.999995	2.17148e-06	0.14569	0.60335
CCNB2	-0.0035447	0.999995	2.17148e-06	0.82431	0.60429
ATRX	-0.2835	0.999995	2.17148e-06	0.94193	0.60551
UBE2A	-0.030147	0.999995	2.17148e-06	0.78557	0.60584
ARID2	-0.2975	0.999995	2.17148e-06	0.22959	0.60662
CHRAC1	-0.15211	0.999995	2.17148e-06	0.93314	0.60735
PARP3	-0.076231	0.999995	2.17148e-06	0.60429	0.60795
NOTCH3	0.031222	0.999995	2.17148e-06	0.30539	0.60851
OR5AK2	0.21444	0.999995	2.17148e-06	0.50458	0.61023
PAPD7	-0.05116	0.999995	2.17148e-06	0.59398	0.6105
TRIP13	-0.12973	0.999995	2.17148e-06	0.76967	0.61073
USP1	0.077869	0.999995	2.17148e-06	0.66517	0.6112
BRD4	-0.31283	0.999995	2.17148e-06	0.8367	0.61174
CCNB1	-0.1787	0.999995	2.17148e-06	0.95382	0.61174
CBX1	0.18333	0.999995	2.17148e-06	0.64115	0.6131
TOP3B	-0.27784	0.999995	2.17148e-06	0.95115	0.6141
H3F3A	0.036728	0.999995	2.17148e-06	0.52121	0.61568
USP3	0.23879	0.999995	2.17148e-06	0.5559	0.61658
POLR2G	-0.22834	0.999995	2.17148e-06	0.91876	0.61766
KAT2B	-0.043863	0.999995	2.17148e-06	0.79579	0.61955
APOBEC3A	0.37048	0.999995	2.17148e-06	0.3492	0.62003
MVP	0.23933	0.999995	2.17148e-06	0.54333	0.62026
APAF1	-0.075388	0.999995	2.17148e-06	0.77303	0.62326
FOXN3	0.086047	0.999995	2.17148e-06	0.37878	0.62394
ASH2L	-0.15684	0.999995	2.17148e-06	0.94306	0.62526
HUS1B	0.10927	0.999995	2.17148e-06	0.092783	0.62588
DTX3	-0.055042	0.999995	2.17148e-06	0.64553	0.62673
SUV39H1	-0.18969	0.999995	2.17148e-06	0.564	0.62707
ING4	-0.05593	0.999995	2.17148e-06	0.4487	0.62841
L3MBTL1	-0.10661	0.999995	2.17148e-06	0.81171	0.62867
COPS2	0.013681	0.999995	2.17148e-06	0.32195	0.6307
MPLKIP	0.019013	0.999995	2.17148e-06	0.51909	0.63082
OR8U1	0.15031	0.999995	2.17148e-06	0.67689	0.63121
CXXC1	-0.38884	0.999995	2.17148e-06	0.98936	0.63255
DTX3L	0.069561	0.999995	2.17148e-06	0.13629	0.63406
FANCD2	0.024815	0.999995	2.17148e-06	0.73781	0.63463
HDAC4	0.074088	0.999995	2.17148e-06	0.64203	0.63704
SENP2	0.011087	0.999995	2.17148e-06	0.76191	0.63753
MUS81	-0.11484	0.999995	2.17148e-06	0.70982	0.63799
RPA3	-0.16255	0.999995	2.17148e-06	0.84225	0.63838
NTHL1	-0.046683	0.999995	2.17148e-06	0.63651	0.64115
FANCB	0.24427	0.999995	2.17148e-06	0.48841	0.64236
HELQ	0.16718	0.999995	2.17148e-06	0.24481	0.6451
SWI5	0.12476	0.999995	2.17148e-06	0.02955	0.64553
IGHMBP2	0.083091	0.999995	2.17148e-06	0.44916	0.64672
OR5F1	-0.075134	0.999995	2.17148e-06	0.049808	0.64723
RMI2	-0.13339	0.999995	2.17148e-06	0.70261	0.64767
XRCC6BP1	0.041394	0.999995	2.17148e-06	0.68442	0.64918
ASF1B	0.082366	0.999995	2.17148e-06	0.28954	0.64985
PSME3	-0.13776	0.999995	2.17148e-06	0.50877	0.65043
RBBP7	0.033406	0.999995	2.17148e-06	0.66657	0.65388
PARP1	-0.060807	0.999995	2.17148e-06	0.80427	0.6582
CUL3	0.40052	0.999995	2.17148e-06	0.093482	0.65881
OR6K2	0.010369	0.999995	2.17148e-06	0.14423	0.66054
RBM7	0.26445	0.999995	2.17148e-06	0.46281	0.66156
OR52R1	0.015403	0.999995	2.17148e-06	0.64167	0.66431
TEP1	-0.031824	0.999995	2.17148e-06	0.62799	0.66473
NEDD8	-0.13019	0.999995	2.17148e-06	0.76547	0.66477
ENDOV	0.024405	0.999995	2.17148e-06	0.62147	0.66535
USP4	0.14451	0.999995	2.17148e-06	0.11646	0.66611
EYA3	-0.24303	0.999995	2.17148e-06	0.97919	0.66647
FIGNL1	-0.054798	0.999995	2.17148e-06	0.29529	0.66657
CSNK2A1	0.30667	0.999995	2.17148e-06	0.42364	0.66706
POLG	-0.063636	0.999995	2.17148e-06	0.79284	0.6675
OR51F1	0.10012	0.999995	2.17148e-06	0.039773	0.66881
UBE2D1	0.3443	0.999995	2.17148e-06	0.21593	0.6692
CDKN1A	0.17693	0.999995	2.17148e-06	0.2274	0.66925
INO80E	0.17696	0.999995	2.17148e-06	0.58513	0.67417
RFWD3	-0.13894	0.999995	2.17148e-06	0.60858	0.67424
SCAF11	-0.13789	0.999995	2.17148e-06	0.90016	0.67674
PARG	0.043566	0.999995	2.17148e-06	0.51393	0.6774
ERCC5	-0.19765	0.999995	2.17148e-06	0.93823	0.67882
ALKBH2	-0.051421	0.999995	2.17148e-06	0.13782	0.67923
PMP22	0.096178	0.999995	2.17148e-06	0.7522	0.67927
KDM4D	-0.1973	0.999995	2.17148e-06	0.15708	0.67974
RNF169	0.16686	0.999995	2.17148e-06	0.15499	0.68026
MTA1	0.16712	0.999995	2.17148e-06	0.62447	0.68163
CBX3	-0.0021176	0.999995	2.17148e-06	0.36479	0.68174
PPP6C	0.09903	0.999995	2.17148e-06	0.26444	0.68183
OR1D5	-0.019271	0.999995	2.17148e-06	0.69469	0.68248
BCLAF1	-0.025737	0.999995	2.17148e-06	0.7445	0.68398
OR52K1	-0.010692	0.999995	2.17148e-06	0.80059	0.68442
COPS7B	0.34546	0.999995	2.17148e-06	0.026284	0.68491
CRY2	0.034672	0.999995	2.17148e-06	0.8284	0.68732
OR6C6	0.33982	0.999995	2.17148e-06	0.04361	0.68996
OGG1	-0.17969	0.999995	2.17148e-06	0.74924	0.69047
THRAP3	-0.13399	0.999995	2.17148e-06	0.62979	0.69064
EME1	0.18068	0.999995	2.17148e-06	0.39114	0.69195
UBE2V1	0.2005	0.999995	2.17148e-06	0.63463	0.69213
PPP4R1	0.18708	0.999995	2.17148e-06	0.70044	0.69248
ABL1	0.2828	0.999995	2.17148e-06	0.20329	0.69413
COPS7A	0.085976	0.999995	2.17148e-06	0.044604	0.69509
TERT	-0.10068	0.999995	2.17148e-06	0.96826	0.69564
RECQL5	0.042283	0.999995	2.17148e-06	0.63175	0.69713
RNF113B	0.0026694	0.999995	2.17148e-06	0.81343	0.69756
BLM	0.01639	0.999995	2.17148e-06	0.86909	0.70044
KIAA1586	0.58127	0.999995	2.17148e-06	0.070469	0.70096
OR51I2	-0.17418	0.999995	2.17148e-06	0.64918	0.70215
INO80C	-0.15119	0.999995	2.17148e-06	0.90865	0.70321
ALKBH3	0.37239	0.999995	2.17148e-06	0.078704	0.70656
MUM1	0.10506	0.999995	2.17148e-06	0.47112	0.70699
BTG2	0.00016566	0.999995	2.17148e-06	0.75807	0.7076
MLH1	0.26148	0.999995	2.17148e-06	0.40272	0.70766
USP45	0.32377	0.999995	2.17148e-06	0.043088	0.70922
SUV420H1	0.26918	0.999995	2.17148e-06	0.43351	0.71309
C1orf86	-0.073935	0.999995	2.17148e-06	0.72171	0.71411
COL1A1	0.030814	0.999995	2.17148e-06	0.87703	0.71574
MARK3	-0.17766	0.999995	2.17148e-06	0.892	0.71618
ETAA1	0.056793	0.999995	2.17148e-06	0.44815	0.71832
ESCO2	-0.15711	0.999995	2.17148e-06	0.63986	0.71861
DYNLL1	-0.15994	0.999995	2.17148e-06	0.8998	0.72037
APTX	0.2298	0.999995	2.17148e-06	0.48489	0.7208
CASP3	0.23358	0.999995	2.17148e-06	0.094869	0.72083
APOBEC3D	0.17537	0.999995	2.17148e-06	0.65883	0.72321
OR8B8	-0.039128	0.999995	2.17148e-06	0.70299	0.72425
RECQL	0.25665	0.999995	2.17148e-06	0.11827	0.72562
UBA3	-0.13104	0.999995	2.17148e-06	0.79303	0.72582
SP100	0.014031	0.999995	2.17148e-06	0.13753	0.72669
MGMT	-0.1161	0.999995	2.17148e-06	0.79385	0.7268
NFATC2IP	-0.14687	0.999995	2.17148e-06	0.94327	0.72741
APEX1	0.0077527	0.999995	2.17148e-06	0.65495	0.72754
ANKRD28	0.43448	0.999995	2.17148e-06	0.20508	0.73066
PPM1D	0.077544	0.999995	2.17148e-06	0.5744	0.73238
OR51M1	-0.0078388	0.999995	2.17148e-06	0.72349	0.73449
PIN1	-0.064082	0.999995	2.17148e-06	0.66582	0.73656
MPG	0.35549	0.999995	2.17148e-06	0.41498	0.7371
TAF9	0.079027	0.999995	2.17148e-06	0.20361	0.73744
COL21A1	0.17509	0.999995	2.17148e-06	0.35417	0.73835
OR10A7	0.1605	0.999995	2.17148e-06	0.36298	0.73904
RAD18	0.19913	0.999995	2.17148e-06	0.16205	0.74041
SHPRH	0.25403	0.999995	2.17148e-06	0.44619	0.74069
OR6C4	0.045035	0.999995	2.17148e-06	0.64461	0.74242
OR2B11	0.031063	0.999995	2.17148e-06	0.13162	0.74283
SCAI	-0.083117	0.999995	2.17148e-06	0.92455	0.74524
OR52B4	0.22248	0.999995	2.17148e-06	0.21257	0.7459
GEN1	0.33833	0.999995	2.17148e-06	0.27751	0.74612
APC	0.0042943	0.999995	2.17148e-06	0.85057	0.74728
SIRT1	-0.0033011	0.999995	2.17148e-06	0.68732	0.74849
TP73	0.20885	0.999995	2.17148e-06	0.2372	0.74888
DNAJC2	-0.10402	0.999995	2.17148e-06	0.3499	0.74909
ZDHHC16	-0.08731	0.999995	2.17148e-06	0.74524	0.7495
RAG1	0.25064	0.999995	2.17148e-06	0.15773	0.7507
PTEN	0.84778	0.058929	1.22967	0.00044766	0.75091
POLL	0.11451	0.999995	2.17148e-06	0.22131	0.75138
COPS4	-0.072768	0.999995	2.17148e-06	0.49745	0.75186
SIRT4	0.22127	0.999995	2.17148e-06	0.1626	0.75356
KDM1A	0.085964	0.999995	2.17148e-06	0.41768	0.7558
DCAF11	0.023494	0.999995	2.17148e-06	0.7225	0.75732
CEP57	0.050397	0.999995	2.17148e-06	0.63121	0.75843
SENP7	0.17149	0.999995	2.17148e-06	0.40766	0.75922
MB21D1	0.25496	0.999995	2.17148e-06	0.26229	0.76432
RMI1	-0.0093379	0.999995	2.17148e-06	0.44232	0.76566
SCAF4	-0.12999	0.999995	2.17148e-06	0.86635	0.76638
RAG2	-0.051357	0.999995	2.17148e-06	0.90663	0.76699
SMC6	0.06289	0.999995	2.17148e-06	0.6489	0.76819
OR4F6	0.099531	0.999995	2.17148e-06	0.5215	0.77033
ZMYND8	0.21664	0.999995	2.17148e-06	0.25424	0.77174
CEP164	-0.0088716	0.999995	2.17148e-06	0.77723	0.77277
ADH5	0.13384	0.999995	2.17148e-06	0.65442	0.77324
OR6B2	-0.093473	0.999995	2.17148e-06	0.4536	0.77357
SMARCAL1	0.11407	0.999995	2.17148e-06	0.53561	0.77357
RNF168	-0.013807	0.999995	2.17148e-06	0.55638	0.77437
OR5AN1	0.26072	0.999995	2.17148e-06	0.51785	0.77512
OR6C74	0.20154	0.999995	2.17148e-06	0.13424	0.77546
ATM	0.1865	0.999995	2.17148e-06	0.56806	0.77723
ERCC8	0.29472	0.999995	2.17148e-06	0.4582	0.77772
TNP1	-0.033826	0.999995	2.17148e-06	0.8185	0.77837
SP140	0.32967	0.999995	2.17148e-06	0.062175	0.77869
PIF1	0.24395	0.999995	2.17148e-06	0.20476	0.78084
POLM	0.19661	0.999995	2.17148e-06	0.61955	0.783
PIAS3	-0.050304	0.999995	2.17148e-06	0.50693	0.78399
OR5T1	0.42291	0.999995	2.17148e-06	0.18555	0.78531
ALDH2	0.26913	0.999995	2.17148e-06	0.48022	0.78591
PDS5B	-0.086308	0.999995	2.17148e-06	0.72624	0.78617
ANKRD44	0.39975	0.999995	2.17148e-06	0.29682	0.78753
POLE3	0.21361	0.999995	2.17148e-06	0.29558	0.78791
XRCC4	0.096053	0.999995	2.17148e-06	0.35074	0.7883
STAG1	0.02793	0.999995	2.17148e-06	0.85244	0.78989
APOBEC3C	0.3104	0.999995	2.17148e-06	0.098136	0.79037
APOBEC2	-0.16794	0.999995	2.17148e-06	0.93867	0.79161
CSNK1E	0.14778	0.999995	2.17148e-06	0.6139	0.79195
BABAM1	0.096812	0.999995	2.17148e-06	0.12903	0.79303
TNKS	0.24281	0.999995	2.17148e-06	0.55335	0.7931
DDB2	0.19069	0.999995	2.17148e-06	0.20825	0.79345
OR10T2	0.37166	0.999995	2.17148e-06	0.18225	0.79386
PER1	0.4503	0.999995	2.17148e-06	0.11823	0.7946
NEIL3	0.14296	0.999995	2.17148e-06	0.5296	0.79552
TDG	-0.010932	0.999995	2.17148e-06	0.75116	0.79611
FANCI	0.0359	0.999995	2.17148e-06	0.84028	0.79755
ATXN3	0.46587	0.999995	2.17148e-06	0.13245	0.79854
NUDT1	0.034455	0.999995	2.17148e-06	0.36354	0.79902
SLX1A	0.11806	0.999995	2.17148e-06	0.59085	0.79915
RNF138	0.10134	0.999995	2.17148e-06	0.69253	0.79932
TFPT	0.146	0.999995	2.17148e-06	0.59931	0.80011
PMS2	0.36395	0.999995	2.17148e-06	0.47802	0.80036
PHIP	0.099578	0.999995	2.17148e-06	0.60693	0.80094
TP63	0.12156	0.999995	2.17148e-06	0.68026	0.80109
OR2T29	-0.036222	0.999995	2.17148e-06	0.8832	0.80125
RASSF7	0.28262	0.999995	2.17148e-06	0.39621	0.80218
TET2	0.14846	0.999995	2.17148e-06	0.14343	0.8041
CDK12	-0.043299	0.999995	2.17148e-06	0.78367	0.80498
CSNK1D	-0.048483	0.999995	2.17148e-06	0.10064	0.80502
CCNE1	-0.051796	0.999995	2.17148e-06	0.5971	0.80606
H2AFX	0.33406	0.999995	2.17148e-06	0.076697	0.80732
PINX1	-0.0069354	0.999995	2.17148e-06	0.72507	0.8097
CHEK2	-0.0077828	0.999995	2.17148e-06	0.56249	0.81058
TYMS	0.18645	0.999995	2.17148e-06	0.27995	0.8114
HDAC10	0.028764	0.999995	2.17148e-06	0.71894	0.81148
PGBD5	0.44338	0.999995	2.17148e-06	0.074178	0.81303
HIPK2	-0.031035	0.999995	2.17148e-06	0.53526	0.81323
ZMYM3	0.07236	0.999995	2.17148e-06	0.41069	0.81477
BRD7	-0.0071576	0.999995	2.17148e-06	0.75184	0.81702
SPIDR	0.28424	0.999995	2.17148e-06	0.5243	0.81731
OPRM1	0.14088	0.999995	2.17148e-06	0.65773	0.81772
PRMT8	0.021515	0.999995	2.17148e-06	0.55917	0.81814
UBB	0.35347	0.999995	2.17148e-06	0.18166	0.81911
CDKN2A	0.0003907	0.999995	2.17148e-06	0.13927	0.81968
DTX4	0.051397	0.999995	2.17148e-06	0.7208	0.82053
MUTYH	0.068019	0.999995	2.17148e-06	0.74449	0.82241
HMGB2	0.019143	0.999995	2.17148e-06	0.76269	0.82325
OR7A5	0.13139	0.999995	2.17148e-06	0.088504	0.82388
OR13A1	0.056117	0.999995	2.17148e-06	0.29082	0.82477
ATXN7	-0.050841	0.999995	2.17148e-06	0.84079	0.82574
HELB	0.0085065	0.999995	2.17148e-06	0.67622	0.82712
NEK8	0.13784	0.999995	2.17148e-06	0.73186	0.82841
ZBTB2	-0.059419	0.999995	2.17148e-06	0.95085	0.82861
SPTBN1	0.25095	0.999995	2.17148e-06	0.23714	0.82926
SENP8	0.30143	0.999995	2.17148e-06	0.12464	0.82935
TRIM65	-0.0039998	0.999995	2.17148e-06	0.88532	0.82995
SLFN11	0.26549	0.999995	2.17148e-06	0.38926	0.83154
UNG	0.07299	0.999995	2.17148e-06	0.10929	0.83199
DCUN1D3	0.4006	0.999995	2.17148e-06	0.042498	0.83304
SCAF8	0.1047	0.999995	2.17148e-06	0.75433	0.83336
NEK9	0.10833	0.999995	2.17148e-06	0.40029	0.83356
LIG4	0.086629	0.999995	2.17148e-06	0.48534	0.83461
OR4A5	0.19101	0.999995	2.17148e-06	0.67841	0.83513
EXD2	0.019272	0.999995	2.17148e-06	0.85689	0.83733
TDP2	0.010082	0.999995	2.17148e-06	0.81263	0.83802
NOTCH4	0.17506	0.999995	2.17148e-06	0.68605	0.83834
PARP4	0.28565	0.999995	2.17148e-06	0.17865	0.8384
USP51	0.46354	0.999995	2.17148e-06	0.15797	0.83896
PML	0.30393	0.999995	2.17148e-06	0.19951	0.83925
CDKN2D	-0.046824	0.999995	2.17148e-06	0.60662	0.83964
OR52B6	0.13669	0.999995	2.17148e-06	0.19412	0.8398
FBXO18	0.19857	0.999995	2.17148e-06	0.34641	0.84028
OR10V1	0.10688	0.999995	2.17148e-06	0.67526	0.84054
GADD45A	-0.097393	0.999995	2.17148e-06	0.47421	0.84062
HNRNPUL1	0.24762	0.999995	2.17148e-06	0.47275	0.84103
OR5AR1	0.4225	0.999995	2.17148e-06	0.22942	0.8413
USP11	-0.027572	0.999995	2.17148e-06	0.36208	0.84453
SLX4IP	0.017809	0.999995	2.17148e-06	0.80462	0.84476
CUL9	0.19638	0.999995	2.17148e-06	0.18062	0.84575
OR10H3	0.16024	0.999995	2.17148e-06	0.28492	0.84632
FAF1	0.13395	0.999995	2.17148e-06	0.68902	0.84656
OR2L13	0.34265	0.999995	2.17148e-06	0.092154	0.84681
OR2T10	0.012807	0.999995	2.17148e-06	0.62841	0.84746
APLF	0.30228	0.999995	2.17148e-06	0.29131	0.84807
ALKBH1	0.1107	0.999995	2.17148e-06	0.49891	0.84863
TRIM34	0.1675	0.999995	2.17148e-06	0.52099	0.84869
C15orf41	0.24328	0.999995	2.17148e-06	0.31261	0.84939
C4orf27	0.44032	0.999995	2.17148e-06	0.25987	0.8494
UBE2U	0.25427	0.999995	2.17148e-06	0.27424	0.84959
TAF6L	0.10177	0.999995	2.17148e-06	0.45052	0.84966
RAD9B	0.14605	0.999995	2.17148e-06	0.035286	0.85128
ZSWIM7	0.085686	0.999995	2.17148e-06	0.29216	0.85472
CHD1L	0.29154	0.999995	2.17148e-06	0.26251	0.85565
TADA2B	0.38986	0.999995	2.17148e-06	0.16308	0.85576
OR5A2	-0.011554	0.999995	2.17148e-06	0.59341	0.85598
ZNF827	0.11488	0.999995	2.17148e-06	0.62206	0.8562
EZH2	0.014971	0.999995	2.17148e-06	0.42598	0.85673
OR10S1	0.34092	0.999995	2.17148e-06	0.16624	0.85678
BMI1	0.42226	0.999995	2.17148e-06	0.14173	0.85708
MDC1	-0.068797	0.999995	2.17148e-06	0.78145	0.85778
SUMO3	0.17702	0.999995	2.17148e-06	0.55776	0.85781
NFE2L2	0.26725	0.999995	2.17148e-06	0.25576	0.85847
LMNA	0.040886	0.999995	2.17148e-06	0.5744	0.85923
USP22	0.018258	0.999995	2.17148e-06	0.87634	0.85923
EXO1	0.062593	0.999995	2.17148e-06	0.11093	0.8603
EID3	0.5121	0.145635	0.836734	0.0018054	0.8608
OR1E2	0.079474	0.999995	2.17148e-06	0.23804	0.86106
HELLS	0.075569	0.999995	2.17148e-06	0.33545	0.8613
PSIP1	0.14989	0.999995	2.17148e-06	0.2663	0.86296
USP44	0.10078	0.999995	2.17148e-06	0.71818	0.86345
NEIL2	-0.0098984	0.999995	2.17148e-06	0.82602	0.86451
OR13C2	0.13729	0.999995	2.17148e-06	0.34252	0.86536
MCM8	0.17097	0.999995	2.17148e-06	0.53509	0.86762
DCUN1D2	0.25185	0.999995	2.17148e-06	0.42708	0.86814
OTUD7B	0.00205	0.999995	2.17148e-06	0.30623	0.86837
SIRT6	0.23129	0.999995	2.17148e-06	0.18	0.86876
RAD54L2	0.25276	0.999995	2.17148e-06	0.50296	0.86897
SSBP2	0.25489	0.999995	2.17148e-06	0.3335	0.87048
REV1	0.07624	0.999995	2.17148e-06	0.6458	0.8706
OR1A2	0.30735	0.999995	2.17148e-06	0.24164	0.87124
MSH6	0.071736	0.999995	2.17148e-06	0.4662	0.87183
PBRM1	0.073912	0.999995	2.17148e-06	0.10772	0.8723
ANKRD32	0.13354	0.999995	2.17148e-06	0.10819	0.87244
EYA4	0.13602	0.999995	2.17148e-06	0.53191	0.87313
BRCA2	0.093068	0.999995	2.17148e-06	0.6885	0.87347
CHD3	-0.039858	0.999995	2.17148e-06	0.12921	0.87353
UBE2R2	0.21468	0.999995	2.17148e-06	0.31716	0.87381
TRIP12	0.43861	0.999995	2.17148e-06	0.031715	0.87562
PRMT6	0.041981	0.999995	2.17148e-06	0.90347	0.87593
NEIL1	0.048866	0.999995	2.17148e-06	0.76671	0.87659
TDP1	0.14492	0.999995	2.17148e-06	0.096866	0.87814
PPM1G	0.18042	0.999995	2.17148e-06	0.53148	0.87851
STRA13	-0.049679	0.999995	2.17148e-06	0.34901	0.87903
SMARCA4	0.084365	0.999995	2.17148e-06	0.6653	0.87952
POLK	0.14972	0.999995	2.17148e-06	0.31756	0.88003
HDAC1	-0.010994	0.999995	2.17148e-06	0.94257	0.88112
MSH2	0.11199	0.999995	2.17148e-06	0.77614	0.88126
ZNF451	0.24354	0.999995	2.17148e-06	0.61214	0.88142
PXMP2	-0.011803	0.999995	2.17148e-06	0.79755	0.88179
CHFR	0.056459	0.999995	2.17148e-06	0.067705	0.88237
HLTF	0.21046	0.999995	2.17148e-06	0.26636	0.88386
KAT2A	0.29041	0.999995	2.17148e-06	0.3233	0.88408
RPS27L	0.26124	0.999995	2.17148e-06	0.39596	0.88431
TP53BP1	-0.019653	0.999995	2.17148e-06	0.79676	0.88504
RNF10	0.14839	0.999995	2.17148e-06	0.43441	0.88658
RPA4	0.042675	0.999995	2.17148e-06	0.77573	0.88686
OR8G1	0.3023	0.999995	2.17148e-06	0.29225	0.88709
OR2L2	0.33302	0.999995	2.17148e-06	0.14973	0.88727
OR6B1	0.11743	0.999995	2.17148e-06	0.29458	0.8876
NHEJ1	0.33133	0.999995	2.17148e-06	0.14095	0.88962
GLG1	0.27419	0.999995	2.17148e-06	0.31164	0.88987
CTCF	0.13595	0.999995	2.17148e-06	0.581	0.89025
CRY1	-0.0017575	0.999995	2.17148e-06	0.77501	0.89203
ASF1A	0.2512	0.999995	2.17148e-06	0.29688	0.89451
RAD23B	0.25592	0.999995	2.17148e-06	0.36804	0.89588
PIAS1	0.21443	0.999995	2.17148e-06	0.2558	0.89636
SIRT3	0.24595	0.999995	2.17148e-06	0.57047	0.89678
UBE2F	0.41521	0.999995	2.17148e-06	0.01981	0.89695
WRNIP1	0.05932	0.999995	2.17148e-06	0.74027	0.89711
OR4C46	0.19405	0.999995	2.17148e-06	0.40453	0.89824
CCNB3	0.20674	0.999995	2.17148e-06	0.09788	0.89901
C7orf49	-0.056541	0.999995	2.17148e-06	0.6154	0.89919
CETN2	0.18943	0.999995	2.17148e-06	0.35668	0.90093
BRE	0.2754	0.999995	2.17148e-06	0.2364	0.901
MDM2	0.32864	0.999995	2.17148e-06	0.35672	0.90144
ERCC6	0.15354	0.999995	2.17148e-06	0.71861	0.90244
OR5L1	0.46397	0.999995	2.17148e-06	0.15978	0.90284
GADD45G	0.27195	0.999995	2.17148e-06	0.22437	0.90291
WDR48	0.039847	0.999995	2.17148e-06	0.83163	0.90307
FANCA	0.14319	0.999995	2.17148e-06	0.39132	0.9032
UCHL3	0.017865	0.999995	2.17148e-06	0.087844	0.90325
OR52L1	0.10634	0.999995	2.17148e-06	0.77331	0.90426
NEK11	0.16066	0.999995	2.17148e-06	0.34817	0.90576
TP53	0.11787	0.999995	2.17148e-06	0.046001	0.90659
DTX1	0.14925	0.999995	2.17148e-06	0.71593	0.90684
TREX1	0.14745	0.999995	2.17148e-06	0.72847	0.90815
SETX	0.0092654	0.999995	2.17148e-06	0.93011	0.90837
XPA	0.23897	0.999995	2.17148e-06	0.57321	0.90854
MORF4L2	0.21149	0.999995	2.17148e-06	0.14234	0.90883
TOP2B	0.20846	0.999995	2.17148e-06	0.18624	0.90891
UBE2V2	-0.006714	0.999995	2.17148e-06	0.49221	0.90902
SSBP1	0.14301	0.999995	2.17148e-06	0.52668	0.90937
CCNA1	0.38572	0.999995	2.17148e-06	0.23449	0.90957
CIB1	0.21812	0.999995	2.17148e-06	0.33746	0.91053
OR4C11	0.39351	0.999995	2.17148e-06	0.10087	0.9116
HFM1	0.29929	0.999995	2.17148e-06	0.28848	0.91175
OR13J1	0.28316	0.999995	2.17148e-06	0.5232	0.9129
APOBEC1	-0.086272	0.999995	2.17148e-06	0.19649	0.9131
TCEB1	0.14693	0.999995	2.17148e-06	0.6005	0.91365
USP7	0.39014	0.999995	2.17148e-06	0.12076	0.9138
UBE2W	0.44094	0.999995	2.17148e-06	0.34044	0.91395
TAOK3	0.074703	0.999995	2.17148e-06	0.13568	0.91415
RNF111	0.3081	0.999995	2.17148e-06	0.061418	0.91524
HDAC9	0.054464	0.999995	2.17148e-06	0.24022	0.91546
PIAS2	0.27881	0.999995	2.17148e-06	0.35411	0.91589
FAN1	0.15335	0.999995	2.17148e-06	0.54206	0.91724
OR6C68	0.30598	0.999995	2.17148e-06	0.29038	0.91829
PARP9	0.10966	0.999995	2.17148e-06	0.68545	0.91868
UBE2D4	0.11022	0.999995	2.17148e-06	0.33116	0.91896
AKAP8	0.10357	0.999995	2.17148e-06	0.39469	0.91911
OR1L6	0.26544	0.999995	2.17148e-06	0.39999	0.91922
OR8D2	0.51861	0.999995	2.17148e-06	0.18856	0.91928
PPP6R1	0.30214	0.999995	2.17148e-06	0.39381	0.9195
Scrambled	0.091639	0.999995	2.17148e-06	0.58439	0.92087
OR1F1	0.11037	0.999995	2.17148e-06	0.58566	0.92088
CNOT7	0.21184	0.999995	2.17148e-06	0.11341	0.92092
OR51I1	0.33501	0.999995	2.17148e-06	0.21675	0.92213
SAMHD1	0.36879	0.999995	2.17148e-06	0.46179	0.92327
BRDT	0.32832	0.999995	2.17148e-06	0.24434	0.924
MSH4	0.20747	0.999995	2.17148e-06	0.04849	0.92411
WHSC1	0.11826	0.999995	2.17148e-06	0.67066	0.92431
OR4K17	0.6115	0.999995	2.17148e-06	0.094358	0.92448
MDM4	0.2579	0.999995	2.17148e-06	0.1085	0.92526
OR51G2	0.20367	0.999995	2.17148e-06	0.11488	0.92577
SFR1	0.20306	0.999995	2.17148e-06	0.24249	0.92725
MLH3	0.0019182	0.999995	2.17148e-06	0.73878	0.92787
OTUB2	0.34439	0.999995	2.17148e-06	0.21362	0.92824
RAP1A	0.091237	0.999995	2.17148e-06	0.61766	0.92829
SUMO1	0.14282	0.999995	2.17148e-06	0.64236	0.93081
OR7D4	0.14122	0.999995	2.17148e-06	0.65881	0.93166
FBXO22	0.082491	0.999995	2.17148e-06	0.090757	0.93198
MBTD1	0.15377	0.999995	2.17148e-06	0.67134	0.93249
POLD4	0.31167	0.999995	2.17148e-06	0.30668	0.93273
CEP63	0.25536	0.999995	2.17148e-06	0.35096	0.93314
DPY30	0.28551	0.999995	2.17148e-06	0.36351	0.93376
CUL7	0.39848	0.999995	2.17148e-06	0.19724	0.93417
AICDA	0.27259	0.999995	2.17148e-06	0.40391	0.93426
BRCC3	0.18685	0.999995	2.17148e-06	0.65043	0.93496
ANP32E	0.19827	0.999995	2.17148e-06	0.41126	0.93548
CDC34	0.31088	0.999995	2.17148e-06	0.3794	0.93571
FAM175A	0.38197	0.999995	2.17148e-06	0.21059	0.93586
RING1	0.3468	0.999995	2.17148e-06	0.10415	0.93604
OR4D1	0.46466	0.999995	2.17148e-06	0.21499	0.93617
OR4D6	0.30958	0.999995	2.17148e-06	0.33133	0.93809
DNTT	0.088368	0.999995	2.17148e-06	0.33593	0.93915
PARPBP	0.49383	0.999995	2.17148e-06	0.032472	0.93959
USP28	0.21583	0.999995	2.17148e-06	0.16785	0.93987
OR52M1	0.15517	0.999995	2.17148e-06	0.20973	0.94032
MORF4L1	0.3419	0.999995	2.17148e-06	0.11537	0.94066
HMGB1	0.29662	0.999995	2.17148e-06	0.36401	0.94079
KDM5A	0.15472	0.999995	2.17148e-06	0.33038	0.94164
FAM175B	0.36601	0.999995	2.17148e-06	0.19548	0.94212
H2AFY2	0.31652	0.999995	2.17148e-06	0.53864	0.9428
OR52B2	0.26101	0.999995	2.17148e-06	0.064232	0.94344
OR6K6	0.15877	0.999995	2.17148e-06	0.34611	0.94442
RAD52	0.079457	0.999995	2.17148e-06	0.56294	0.94447
RAD54B	0.2659	0.999995	2.17148e-06	0.43114	0.94464
OR13C4	0.40939	0.999995	2.17148e-06	0.12337	0.94479
NBN	0.30716	0.999995	2.17148e-06	0.23324	0.945
OR5AP2	0.50126	0.999995	2.17148e-06	0.131	0.94542
OR52A5	0.61802	0.999995	2.17148e-06	0.077868	0.94569
DCUN1D4	0.28443	0.999995	2.17148e-06	0.19423	0.94592
OR5R1	0.42998	0.999995	2.17148e-06	0.024011	0.9469
OR4K14	0.34558	0.999995	2.17148e-06	0.25333	0.94699
RRM2B	0.42458	0.999995	2.17148e-06	0.22349	0.94764
EXO5	0.33383	0.999995	2.17148e-06	0.46544	0.94789
ZMPSTE24	0.26486	0.999995	2.17148e-06	0.29905	0.95066
ASCC1	0.31924	0.999995	2.17148e-06	0.38807	0.95082
TOPORS	0.32774	0.999995	2.17148e-06	0.086959	0.95143
PRIMPOL	0.30189	0.999995	2.17148e-06	0.052652	0.95178
FANCL	0.075564	0.999995	2.17148e-06	0.59801	0.95285
RNF165	0.15604	0.999995	2.17148e-06	0.55089	0.9534
OR6N2	0.48126	0.999995	2.17148e-06	0.05152	0.95414
OR10Q1	0.41094	0.999995	2.17148e-06	0.3105	0.9542
OR6V1	0.35321	0.999995	2.17148e-06	0.22188	0.95431
HES1	0.27229	0.999995	2.17148e-06	0.3591	0.95531
DBF4	0.0091148	0.999995	2.17148e-06	0.86029	0.95542
KLHL15	0.23933	0.999995	2.17148e-06	0.34532	0.95561
BRAP	0.33514	0.999995	2.17148e-06	0.40586	0.95669
APITD1	0.34679	0.999995	2.17148e-06	0.029295	0.95714
CDK8	0.22318	0.999995	2.17148e-06	0.048824	0.95726
RNF7	0.42014	0.999995	2.17148e-06	0.13268	0.95786
SALL4	0.32188	0.999995	2.17148e-06	0.18606	0.95798
ERCC6L2	0.1914	0.999995	2.17148e-06	0.037077	0.9584
SPO11	0.51222	0.999995	2.17148e-06	0.091681	0.9588
OR4F15	0.33308	0.999995	2.17148e-06	0.41146	0.95896
MPZ	0.22311	0.999995	2.17148e-06	0.45294	0.95916
WRN	0.49563	0.999995	2.17148e-06	0.04971	0.95929
PARK7	0.2017	0.999995	2.17148e-06	0.43375	0.96037
OR1L4	0.43616	0.999995	2.17148e-06	0.086841	0.96044
C11orf30	0.3585	0.999995	2.17148e-06	0.21226	0.96067
UBE2B	0.33597	0.999995	2.17148e-06	0.44558	0.96141
PARP2	0.17937	0.999995	2.17148e-06	0.38964	0.96384
HDAC2	0.3523	0.999995	2.17148e-06	0.42603	0.96405
OR56B1	0.26897	0.999995	2.17148e-06	0.14722	0.96459
PARK2	0.47112	0.999995	2.17148e-06	0.21155	0.96596
OR2F2	0.42525	0.999995	2.17148e-06	0.17021	0.9664
SMUG1	0.34552	0.999995	2.17148e-06	0.39666	0.96721
PIAS4	0.33086	0.999995	2.17148e-06	0.23248	0.96796
AUNIP	0.29805	0.999995	2.17148e-06	0.50751	0.96797
BRD1	0.36667	0.999995	2.17148e-06	0.10757	0.96905
INO80D	0.058435	0.999995	2.17148e-06	0.41421	0.96962
OR1N1	0.27931	0.999995	2.17148e-06	0.10342	0.96973
OR6X1	0.52828	0.999995	2.17148e-06	0.14803	0.9699
OR10G2	0.25708	0.999995	2.17148e-06	0.37675	0.97052
OR5L2	0.25791	0.999995	2.17148e-06	0.46889	0.97069
CNOT4	0.33213	0.999995	2.17148e-06	0.059027	0.97176
MAPK8	0.27225	0.999995	2.17148e-06	0.34399	0.97292
RHNO1	0.32831	0.999995	2.17148e-06	0.25094	0.97308
DCUN1D5	0.27724	0.999995	2.17148e-06	0.078045	0.97354
OR51B4	0.43966	0.999995	2.17148e-06	0.2739	0.97373
PPP6R2	0.31267	0.999995	2.17148e-06	0.40813	0.97394
SMARCAD1	0.42672	0.999995	2.17148e-06	0.069003	0.97406
DLGAP5	0.38042	0.999995	2.17148e-06	0.20674	0.97459
PHF3	0.45512	0.999995	2.17148e-06	0.1902	0.97462
DCUN1D1	0.13568	0.999995	2.17148e-06	0.67948	0.97477
OR8G5	0.34213	0.999995	2.17148e-06	0.38746	0.97479
TRAPPC13	0.38322	0.999995	2.17148e-06	0.27792	0.97533
OR10R2	0.28662	0.999995	2.17148e-06	0.31688	0.97618
RHO	0.28402	0.999995	2.17148e-06	0.38204	0.97671
HPRT1	0.27376	0.999995	2.17148e-06	0.61686	0.97816
OR5M10	0.53725	0.999995	2.17148e-06	0.045597	0.97848
CUL4B	0.49343	0.999995	2.17148e-06	0.081351	0.97917
OR6K3	0.3824	0.999995	2.17148e-06	0.2471	0.97978
RNF2	0.25254	0.999995	2.17148e-06	0.069692	0.97994
MAPKAPK2	0.2092	0.999995	2.17148e-06	0.51171	0.98015
OR4A47	0.34861	0.999995	2.17148e-06	0.25529	0.98036
TRIM29	0.45963	0.092857	1.03219	0.00095927	0.98256
OR1I1	0.35071	0.999995	2.17148e-06	0.35288	0.9833
POLI	0.40013	0.999995	2.17148e-06	0.067469	0.98356
PER2	0.31752	0.999995	2.17148e-06	0.55982	0.98436
OR5B3	0.52926	0.999995	2.17148e-06	0.16869	0.98467
UHRF2	0.17606	0.999995	2.17148e-06	0.24646	0.98534
OR8K3	0.44512	0.999995	2.17148e-06	0.060611	0.98565
OR52N5	0.50223	0.999995	2.17148e-06	0.11169	0.98604
SUV420H2	0.1166	0.999995	2.17148e-06	0.61759	0.98661
PHF11	0.32497	0.999995	2.17148e-06	0.11408	0.98689
BAZ1A	0.3483	0.999995	2.17148e-06	0.13224	0.98724
ARID1A	0.42905	0.999995	2.17148e-06	0.22345	0.98736
USP26	0.46752	0.999995	2.17148e-06	0.057246	0.98761
C10orf12	0.26819	0.999995	2.17148e-06	0.52323	0.98783
MBD4	0.42258	0.999995	2.17148e-06	0.26293	0.98794
PTPN2	0.28256	0.999995	2.17148e-06	0.46467	0.98798
OR4C45	0.35485	0.999995	2.17148e-06	0.22259	0.98799
PRDM9	0.51701	0.999995	2.17148e-06	0.095991	0.98817
PAGR1	0.25843	0.999995	2.17148e-06	0.38635	0.98902
OR4B1	0.38718	0.999995	2.17148e-06	0.12581	0.98993
TCEB2	0.22866	0.999995	2.17148e-06	0.53031	0.99002
BOD1L1	0.28744	0.999995	2.17148e-06	0.51476	0.99072
OR4D5	0.51012	0.999995	2.17148e-06	0.1037	0.99073
OR7G3	0.42033	0.999995	2.17148e-06	0.26877	0.99085
SUV39H2	0.36678	0.999995	2.17148e-06	0.41899	0.99125
UIMC1	0.50915	0.999995	2.17148e-06	0.10586	0.99135
PER3	0.32596	0.999995	2.17148e-06	0.52585	0.99159
PARP15	0.36027	0.999995	2.17148e-06	0.20812	0.99188
CUL5	0.60066	0.999995	2.17148e-06	0.049739	0.99198
OR4P4	0.5257	0.999995	2.17148e-06	0.05456	0.99226
OR4L1	0.35356	0.999995	2.17148e-06	0.40948	0.99246
RNF146	0.91044	0.058929	1.22967	0.00038863	0.99248
SIRT5	0.35464	0.999995	2.17148e-06	0.16533	0.99249
TAOK2	0.47487	0.999995	2.17148e-06	0.19494	0.99254
RNF17	0.28862	0.999995	2.17148e-06	0.42855	0.99264
AMN1	0.27645	0.999995	2.17148e-06	0.075585	0.99279
OR4K1	0.40781	0.999995	2.17148e-06	0.15481	0.99303
USP15	0.39656	0.999995	2.17148e-06	0.11687	0.99317
OR8B3	0.54416	0.999995	2.17148e-06	0.042537	0.99336
OR5M9	0.43082	0.999995	2.17148e-06	0.26293	0.99488
ATF2	0.52537	0.999995	2.17148e-06	0.11319	0.99496
ASH1L	0.306	0.999995	2.17148e-06	0.49616	0.99624
STAG2	0.81861	0.066138	1.17955	0.00061492	0.99662
PMS1	0.37916	0.999995	2.17148e-06	0.32958	0.99774
DMC1	0.54039	0.999995	2.17148e-06	0.1068	0.99857
PRKCG	0.50973	0.999995	2.17148e-06	0.020705	0.99948
UBE2D2	0.40877	0.999995	2.17148e-06	0.13473	0.99981
LATS1	0.60097	0.999995	2.17148e-06	0.037274	0.99985
FBXW7	0.87344	0.058929	1.22967	0.00048701	0.99991
CREBBP	0.85464	0.000952	3.02136	4.9193e-06	0.99997
CCNC	0.5742	0.999995	2.17148e-06	0.099739	0.99999
CAND1	1.45	0.000952	3.02136	4.9193e-06	1
EP300	1.1361	0.000952	3.02136	4.9193e-06	1
KEAP1	0.74795	0.1	1	0.0011364	1
LATS2	1.2148	0.000952	3.02136	4.9193e-06	1
SMARCD1	1.2192	0.000952	3.02136	4.9193e-06	1

## Sheet: This paper, WT
Gene	lfc	fdr	fdr_log10	pos_p	neg_p
CDK4	-1.5595	0.052381	1.28083	1	6.3951e-05
CCNA2	-1.3724	0.052381	1.28083	0.99254	0.00012298
FAM178A	-1.0973	0.052381	1.28083	0.99994	0.00016234
POLR2B	-1.265	0.079762	1.0982	0.99993	0.00032959
PRPF19	-1.4176	0.109524	0.960491	0.99982	0.00056572
DNA2	-1.6217	0.111905	0.951151	0.99941	0.00069362
SMG1	-1.5025	0.131169	0.882169	0.99805	0.0013036
UBE2N	-0.7682	0.131169	0.882169	0.95489	0.0013135
NCAPG2	-1.4568	0.131169	0.882169	0.99955	0.0013528
POLR2E	-1.0573	0.131169	0.882169	0.99953	0.001402
GPS1	-0.96457	0.131169	0.882169	0.99947	0.0014906
CCND1	-1.2587	0.171709	0.765207	0.99933	0.0021596
POLR2J	-1.23	0.171709	0.765207	0.99697	0.0024744
MCM3	-1.0759	0.171709	0.765207	0.99906	0.0026318
DUT	-1.3396	0.171709	0.765207	0.99894	0.0028384
SUPT6H	-1.1082	0.171709	0.765207	0.9989	0.0028876
MASTL	-1.1227	0.171709	0.765207	0.99938	0.0030155
GTF2H4	-0.99269	0.193056	0.714317	0.98916	0.0036452
REV3L	-0.57128	0.193056	0.714317	0.99917	0.0039601
NHP2	-1.0801	0.193056	0.714317	0.99912	0.0043044
KAT8	-1.0749	0.193056	0.714317	0.9266	0.0045012
HNRNPK	-1.1765	0.193056	0.714317	0.99815	0.0046291
KAT5	-0.68805	0.193056	0.714317	0.99814	0.0046389
PLRG1	-1.0553	0.193056	0.714317	0.89298	0.0047865
CHAF1B	-0.96183	0.218864	0.659826	0.9978	0.0058196
SMC3	-0.98579	0.218864	0.659826	0.99779	0.0058786
ERCC3	-1.1156	0.220988	0.655631	0.99617	0.0061639
RTF1	-1.0725	0.22398	0.649791	0.99689	0.0064787
PSMD14	-0.78427	0.228407	0.641291	0.99836	0.0068428
POLR2C	-0.88658	0.231696	0.635081	0.99822	0.0074626
TOP2A	-0.78662	0.231696	0.635081	0.99821	0.0075118
POLD2	-0.93496	0.231696	0.635081	0.99695	0.0076594
UBC	-0.65607	0.233459	0.631789	0.99799	0.0081316
RFC3	-1.0342	0.233459	0.631789	0.90633	0.0082891
UBE2D3	-0.79547	0.233459	0.631789	0.99784	0.0085252
MDM2	-0.85165	0.233459	0.631789	0.93615	0.0088105
OR4F21	-0.8324	0.233459	0.631789	0.99653	0.0090663
COPS6	-0.78559	0.233459	0.631789	0.99648	0.0091647
MCM3AP	-1.0553	0.241376	0.617306	0.98263	0.0099124
POLR2I	-0.72929	0.241376	0.617306	0.99607	0.010178
PPM1G	-1.1197	0.241376	0.617306	0.99474	0.010276
RNF113A	-1.1948	0.241376	0.617306	0.97469	0.010513
SFPQ	-0.77954	0.241376	0.617306	0.99586	0.010857
HMGA1	-1.2223	0.241376	0.617306	0.95728	0.011064
MYBBP1A	-0.84664	0.241376	0.617306	0.9202	0.011221
CCDC101	-0.6688	0.262599	0.580707	0.99507	0.012785
MCM2	-0.74446	0.262599	0.580707	0.99499	0.012903
DDB1	-0.74486	0.262599	0.580707	0.99496	0.013021
POLD3	-0.26575	0.263585	0.579079	0.58862	0.013553
PPP4C	-1.0663	0.263585	0.579079	0.99471	0.01375
MCM7	-1.172	0.263585	0.579079	0.99467	0.013887
POLR2L	-1.6255	0.265714	0.575586	0.99442	0.014507
PRMT1	-1.1266	0.265714	0.575586	0.98736	0.014851
HUWE1	-0.94803	0.265714	0.575586	0.99656	0.014881
RAD51D	-0.91802	0.265714	0.575586	0.99467	0.015097
UBE2C	-0.97378	0.266249	0.574712	0.92794	0.015629
YBX1	-0.61295	0.266249	0.574712	0.99402	0.015678
GTF2H2	-0.39448	0.267554	0.572589	0.92253	0.016091
NPM1	-1.441	0.267554	0.572589	0.90916	0.016308
SSBP3	-0.59543	0.272937	0.563938	0.99543	0.016918
MDM4	-0.92761	0.282826	0.548481	0.99323	0.017823
NCAPD2	-0.67173	0.284301	0.546222	0.99501	0.018413
FEN1	-0.55076	0.284301	0.546222	0.99498	0.01862
OR11H1	-0.63668	0.284301	0.546222	0.93063	0.018797
TEN1	-0.57838	0.285201	0.544849	0.99483	0.019151
POLR2D	-0.67791	0.287345	0.541596	0.99251	0.019712
DROSHA	-0.67589	0.287345	0.541596	0.99246	0.020204
TERF2	-0.84023	0.287345	0.541596	0.99211	0.020322
USP37	-0.74404	0.287345	0.541596	0.99434	0.020942
NUDT16L1	-0.51683	0.287345	0.541596	0.99505	0.021158
MAU2	-0.9508	0.287345	0.541596	0.99212	0.021247
EP400	-0.88031	0.287345	0.541596	0.88504	0.021552
RBBP8	-0.60364	0.287345	0.541596	0.99189	0.02167
DCLRE1B	-0.98086	0.28861	0.539689	0.83685	0.022063
SMC2	-0.61296	0.28891	0.539237	0.99171	0.022496
POLR2A	-0.41261	0.28891	0.539237	0.99451	0.022683
PPM1D	-0.97474	0.304123	0.516951	0.98668	0.024779
WAPAL	-0.87899	0.304123	0.516951	0.88611	0.024985
RRM2	-1.4185	0.304123	0.516951	0.9904	0.025418
RTFDC1	-0.85208	0.304123	0.516951	0.98612	0.025507
POLR2H	-1.1121	0.304123	0.516951	0.96858	0.025684
SMC1A	-0.44408	0.304123	0.516951	0.9929	0.025762
THOC2	-1.3437	0.307843	0.511671	0.98545	0.026402
ERCC2	-0.61469	0.307843	0.511671	0.98012	0.026766
MCM5	-0.99443	0.307843	0.511671	0.72208	0.027032
RFC4	-0.74118	0.313234	0.504131	0.99237	0.027829
SUPT5H	-0.55388	0.316954	0.499004	0.86913	0.029245
HDAC3	-0.56721	0.316954	0.499004	0.99192	0.029442
SERBP1	-1.0116	0.316954	0.499004	0.96983	0.02955
POLE2	-0.81735	0.316954	0.499004	0.98863	0.029757
ERCC1	-0.64226	0.316954	0.499004	0.9922	0.029796
UBA1	-1.118	0.317716	0.497961	0.98847	0.030426
DDX1	-0.8852	0.317716	0.497961	0.98842	0.030524
SOD1	-0.71795	0.33378	0.47654	0.99103	0.03265
NDNL2	-0.86273	0.33378	0.47654	0.98708	0.032827
ERCC5	-0.49027	0.33378	0.47654	0.98736	0.033102
CDC5L	-1.4627	0.340844	0.467444	0.98462	0.034155
MCM6	0.03435	0.999995	2.17148e-06	0.73073	0.034598
ATMIN	-1.2439	0.351563	0.453997	0.98614	0.035955
THOC1	-0.42209	0.352048	0.453398	0.986	0.036369
NCAPH2	-0.29549	0.354597	0.450265	0.77777	0.036998
USP7	-0.53924	0.365844	0.436704	0.9849	0.039133
POLE	-0.59735	0.365844	0.436704	0.98478	0.039448
VCP	-0.77031	0.365844	0.436704	0.98724	0.040097
CHEK1	-0.88445	0.365844	0.436704	0.94728	0.040186
SLBP	-0.72835	0.365844	0.436704	0.98445	0.040442
TIPIN	-0.40458	0.365844	0.436704	0.98829	0.041012
TAF1	-1.0898	0.365844	0.436704	0.95923	0.041071
UBE2M	-0.36305	0.365844	0.436704	0.98819	0.041298
WDR70	-0.40697	0.365844	0.436704	0.98394	0.041573
UHRF1	-0.55948	0.37005	0.43174	0.9833	0.043059
MMS19	-0.89164	0.37005	0.43174	0.98323	0.043256
TRRAP	-0.95046	0.37005	0.43174	0.98315	0.043324
ARID1B	-0.71079	0.37005	0.43174	0.98299	0.04358
ACTL6A	-0.84138	0.396398	0.401869	0.97424	0.047093
INO80	-0.35683	0.409811	0.387416	0.98523	0.04911
DSCC1	0.23182	0.751391	0.124134	0.13817	0.050576
NAE1	-0.28948	0.415537	0.38139	0.98476	0.050654
METTL3	-0.47131	0.417967	0.378858	0.97978	0.051382
SIN3A	-0.065752	0.423731	0.37291	0.56869	0.052691
TELO2	-1.0024	0.423731	0.37291	0.70788	0.052966
XRCC5	-0.75991	0.424952	0.37166	0.73997	0.054186
RNASEH2A	-0.91861	0.424952	0.37166	0.96945	0.054403
RPS27L	-0.75216	0.424952	0.37166	0.67293	0.05456
NCAPD3	-0.93594	0.424952	0.37166	0.65927	0.054875
CBX5	-0.51432	0.432237	0.364278	0.62395	0.056262
BTG2	-0.18749	0.449381	0.347385	0.98196	0.058958
RAD51	-0.73987	0.471059	0.326925	0.97325	0.062515
POLE3	-0.77102	0.471059	0.326925	0.96491	0.062775
TERF1	-0.55798	0.48474	0.314491	0.97373	0.065393
SSRP1	-0.39248	0.48474	0.314491	0.97347	0.065944
RPA2	-0.41468	0.48474	0.314491	0.71778	0.066101
FANCM	-0.63253	0.486455	0.312957	0.9791	0.067144
TINF2	-0.47323	0.486455	0.312957	0.19252	0.067823
TTI2	-1.11	0.486455	0.312957	0.96177	0.067842
CDCA5	-0.56521	0.492752	0.307372	0.93651	0.06923
XRCC6	-0.59172	0.502261	0.299071	0.69225	0.071197
POLR2K	-0.64373	0.502261	0.299071	0.95939	0.071886
FOXM1	-0.31891	0.502261	0.299071	0.97744	0.072122
SLX4	-0.49858	0.503299	0.298174	0.97715	0.072791
TOPBP1	-0.78282	0.50412	0.297466	0.66403	0.073431
TCOF1	-0.26962	0.513179	0.289731	0.88258	0.07528
PPP4R2	-0.6033	0.517116	0.286412	0.96833	0.076392
PNN	-0.72609	0.51931	0.284573	0.92404	0.077366
BRD2	-0.68588	0.51931	0.284573	0.96776	0.077789
BRCA1	-0.32903	0.531256	0.274696	0.96647	0.080908
FANCF	-1.2326	0.531256	0.274696	0.96631	0.081302
TIMELESS	-0.71104	0.531256	0.274696	0.8775	0.08138
MEN1	-0.75924	0.531256	0.274696	0.85874	0.081774
TOP3A	-0.37654	0.542381	0.265696	0.96511	0.084047
ACD	-0.70218	0.549969	0.259662	0.96435	0.085916
MCM4	-0.64115	0.549969	0.259662	0.96422	0.086359
HINFP	-0.61217	0.560823	0.251174	0.86414	0.088769
RPA1	-0.56378	0.560823	0.251174	0.97187	0.089222
UBA2	-0.5896	0.563792	0.248881	0.65036	0.090953
COPS5	-0.095898	0.563792	0.248881	0.84746	0.091868
RNF4	-0.47006	0.563792	0.248881	0.61867	0.092282
RUVBL2	-0.6747	0.563792	0.248881	0.94744	0.09239
PARP1	-0.30469	0.563792	0.248881	0.78781	0.092606
OTUB1	-0.52658	0.569613	0.24442	0.96105	0.094151
NONO	-0.49221	0.586897	0.231438	0.78122	0.097614
CDK7	-0.61694	0.592563	0.227265	0.63584	0.099169
PCNA	-0.71551	0.592742	0.227134	0.94427	0.10116
CTC1	-0.36827	0.592742	0.227134	0.95593	0.10133
CSNK2B	0.33857	0.834434	0.078608	0.21637	0.10163
CHTF18	-0.30284	0.592742	0.227134	0.98628	0.10165
SENP6	-0.55553	0.592759	0.227122	0.94116	0.10249
NOP10	-0.55724	0.592759	0.227122	0.93163	0.10317
XRCC3	-0.40832	0.592759	0.227122	0.9571	0.10349
MORF4L1	-0.44945	0.595322	0.225248	0.83587	0.10455
TAF1L	-0.44591	0.601197	0.220983	0.88102	0.1062
SMG6	-0.44249	0.627547	0.202354	0.75122	0.11151
GTF2H1	-0.86472	0.630503	0.200313	0.65653	0.11314
PCID2	-0.27369	0.630503	0.200313	0.91845	0.11375
GTF2H5	-0.53667	0.630503	0.200313	0.92539	0.11399
UCHL5	-0.38319	0.634659	0.19746	0.66811	0.11539
PRMT6	-0.4136	0.647377	0.188843	0.48075	0.11837
RUVBL1	-0.78579	0.655886	0.183172	0.88092	0.12061
DNMT1	-0.64863	0.66881	0.174697	0.85799	0.12413
H3F3B	-0.61891	0.66881	0.174697	0.73109	0.12437
RAD9A	-0.46377	0.674819	0.170813	0.88079	0.12658
TRIP13	-0.69472	0.674819	0.170813	0.64284	0.12786
PRKDC	-0.32606	0.674819	0.170813	0.81749	0.12826
SETD2	-0.24922	0.674819	0.170813	0.46662	0.12827
ZBTB2	-0.35278	0.675861	0.170143	0.98605	0.12952
MTOR	-0.2411	0.675861	0.170143	0.901	0.13054
HMGN1	-0.72118	0.675861	0.170143	0.92456	0.13086
SWI5	-0.31318	0.675861	0.170143	0.94451	0.13126
USP10	-0.4409	0.681305	0.166658	0.94365	0.13302
MTA3	-0.13926	0.726052	0.139032	0.93851	0.14353
BUB1B	-0.54401	0.726052	0.139032	0.90145	0.14548
CDK9	-0.37329	0.726052	0.139032	0.83662	0.14574
C1orf86	-0.13044	0.726052	0.139032	0.9371	0.14644
SAE1	-0.40896	0.726052	0.139032	0.4114	0.14658
YTHDF2	-0.38105	0.726052	0.139032	0.91267	0.14741
PDS5A	-0.17391	0.726052	0.139032	0.91798	0.1475
NCAPG	-0.28157	0.726052	0.139032	0.93553	0.14985
WDR48	-0.65477	0.726052	0.139032	0.96697	0.15142
USP20	-0.3391	0.726052	0.139032	0.95575	0.15181
ORC2	-0.52357	0.726052	0.139032	0.55251	0.15302
SKP1	-0.31006	0.726052	0.139032	0.83584	0.15306
ERCC6L	-0.36673	0.726052	0.139032	0.68724	0.1533
UBE2NL	0.24635	0.999995	2.17148e-06	0.41931	0.15349
UBE2S	-0.71687	0.726052	0.139032	0.93384	0.15379
GPI	-0.46781	0.726052	0.139032	0.67692	0.15441
APOBEC3H	-0.1385	0.726052	0.139032	0.93353	0.15451
PNKP	-0.49868	0.729464	0.136996	0.9328	0.15617
OBFC1	-0.15352	0.729464	0.136996	0.88831	0.15674
RECQL4	-0.60454	0.735407	0.133472	0.89547	0.15878
DKC1	-0.43444	0.742005	0.129593	0.90568	0.1612
SUPT16H	-0.40741	0.742005	0.129593	0.9432	0.16356
DDX11	-0.28639	0.742005	0.129593	0.84197	0.16401
USP5	-0.65879	0.742005	0.129593	0.96212	0.16515
NELFB	-0.49969	0.742005	0.129593	0.26215	0.16525
PLK1	-0.47977	0.742005	0.129593	0.96572	0.1661
FANCG	-0.65846	0.742005	0.129593	0.90146	0.16626
SMARCB1	-0.77767	0.742005	0.129593	0.5914	0.16663
CUL1	-0.16698	0.742005	0.129593	0.79939	0.1671
RNF20	-0.36829	0.746836	0.126775	0.75999	0.16896
OR52I1	-0.73102	0.747814	0.126206	0.43345	0.16996
DAXX	-0.51327	0.748842	0.12561	0.82522	0.17171
FZR1	-0.50959	0.748842	0.12561	0.96789	0.17174
BCCIP	-0.37801	0.751121	0.12429	0.57116	0.17304
LIG4	-0.47351	0.758014	0.120323	0.90854	0.17541
RIF1	-0.2948	0.76091	0.118667	0.94024	0.17686
COPS8	-0.50722	0.761884	0.118111	0.89501	0.17788
KDM1A	-0.49242	0.762678	0.117659	0.70443	0.17937
ECT2	-0.20648	0.762678	0.117659	0.31523	0.17964
KDM2A	-0.5531	0.764837	0.116431	0.92915	0.18094
RNF8	-0.49563	0.765776	0.115898	0.50391	0.18195
UVRAG	-0.46644	0.773378	0.111608	0.87041	0.1849
MAD2L2	-0.4194	0.773378	0.111608	0.91778	0.18536
H3F3A	-0.33044	0.78179	0.10691	0.8877	0.18818
SLX1A	-0.22277	0.790212	0.102256	0.7493	0.19102
OR2T35	-0.21074	0.792563	0.100966	0.68215	0.19241
POLH	-0.27403	0.796434	0.0988502	0.75323	0.19571
EIF4A1	-0.61605	0.796434	0.0988502	0.91527	0.19631
FANCC	-0.17203	0.796434	0.0988502	0.95721	0.19661
COPS3	-0.38621	0.796434	0.0988502	0.6122	0.19664
TCEB3	-0.53477	0.802837	0.0953726	0.65563	0.19905
POLQ	-0.40319	0.819818	0.0862826	0.61391	0.20411
MCPH1	-0.37043	0.832338	0.0797003	0.79847	0.20851
HELLS	-0.37925	0.832338	0.0797003	0.6951	0.20911
CLSPN	-0.32715	0.832338	0.0797003	0.82754	0.2098
BRIP1	-0.4166	0.833162	0.0792705	0.92853	0.21118
HUS1	-0.43232	0.833162	0.0792705	0.64792	0.21301
PDS5B	-0.33297	0.833162	0.0792705	0.90846	0.21448
COPS7B	-0.38983	0.833162	0.0792705	0.87012	0.21457
SMC4	-0.3889	0.833162	0.0792705	0.89853	0.21477
SET	-0.4607	0.833162	0.0792705	0.36715	0.21518
DICER1	-0.40077	0.847752	0.0717312	0.55243	0.21982
PALB2	-0.13492	0.848432	0.071383	0.87593	0.22087
XRCC2	-0.26778	0.849106	0.0710381	0.81634	0.22193
POLL	-0.33281	0.856899	0.0670704	0.80711	0.22485
RAD50	0.40771	0.765645	0.115973	0.15349	0.22626
BRAT1	-0.19621	0.870081	0.0604403	0.85847	0.23051
RTEL1	-0.59676	0.870081	0.0604403	0.81411	0.23151
GAR1	-0.51919	0.870081	0.0604403	0.7034	0.2319
UBE2T	-0.62911	0.876208	0.0573928	0.85411	0.23627
DYNLL1	-0.055111	0.876208	0.0573928	0.88525	0.2375
TADA3	0.14875	0.999995	2.17148e-06	0.7331	0.23851
PXMP2	-0.29513	0.876208	0.0573928	0.92045	0.23946
RAD1	-0.2546	0.876208	0.0573928	0.16744	0.24033
BCAS2	-0.1043	0.876208	0.0573928	0.93061	0.24049
TOP1	-0.056695	0.876208	0.0573928	0.82728	0.24246
MNAT1	-0.48175	0.876208	0.0573928	0.67979	0.24285
APEX2	-0.37072	0.876208	0.0573928	0.83752	0.24358
C19orf40	-0.69961	0.876208	0.0573928	0.84079	0.24364
NIPBL	-0.50547	0.876208	0.0573928	0.66362	0.24412
UPF1	-0.69372	0.876208	0.0573928	0.84868	0.24462
TICRR	-0.5976	0.876208	0.0573928	0.81459	0.24607
POLE4	-0.61795	0.876208	0.0573928	0.91565	0.24629
CHD4	-0.40418	0.876208	0.0573928	0.73143	0.24711
L3MBTL1	-0.28939	0.88375	0.0536706	0.42964	0.25015
PSME3	-0.50322	0.891273	0.0499892	0.74607	0.2532
RAD17	-0.5308	0.901994	0.0447964	0.80249	0.25729
SIRT2	-0.35633	0.901994	0.0447964	0.77948	0.25811
ACTR5	-0.53231	0.909353	0.0412675	0.80682	0.26166
ANP32E	-0.21294	0.909353	0.0412675	0.87405	0.2621
NEIL1	-0.17743	0.923013	0.0347922	0.665	0.26735
TFPT	-0.2502	0.923013	0.0347922	0.46563	0.26794
HNRNPUL1	-0.40522	0.923421	0.0346003	0.72001	0.26901
NSMCE2	-0.49887	0.927347	0.0327577	0.81904	0.27115
BARD1	-0.2927	0.927347	0.0327577	0.95704	0.27207
POLR2F	-0.46606	0.950593	0.0220054	0.87497	0.27988
TRIM28	-0.42925	0.961522	0.0170408	0.86179	0.28409
RNF40	-0.25385	0.967894	0.0141722	0.8562	0.28697
SUV39H1	-0.19747	0.969825	0.0133066	0.82447	0.28854
ATRX	-0.26817	0.975307	0.0108587	0.93047	0.29119
HMGA2	-0.3462	0.975307	0.0108587	0.70975	0.29244
SPRTN	-0.17123	0.975307	0.0108587	0.80642	0.2932
OR10H5	-0.32886	0.975946	0.0105742	0.67739	0.2944
FAM35A	-0.45284	0.982724	0.00756844	0.90721	0.29746
OGG1	-0.26653	0.985666	0.00627022	0.91842	0.29937
ATR	-0.61059	0.986606	0.00585625	0.92319	0.30299
RAD23A	-0.1891	0.986606	0.00585625	0.42373	0.3032
TERT	-0.20856	0.986606	0.00585625	0.8902	0.30338
TONSL	-0.434	0.986606	0.00585625	0.88851	0.30378
OR7A5	-0.35339	0.986606	0.00585625	0.2681	0.30475
LMNA	-0.29666	0.988815	0.00488495	0.83616	0.30676
MPLKIP	-0.10161	0.988815	0.00488495	0.54806	0.30747
CHRAC1	-0.25505	0.991181	0.00384703	0.97093	0.31021
ATAD5	-0.42277	0.991181	0.00384703	0.40419	0.31082
TERF2IP	-0.47311	0.991181	0.00384703	0.90821	0.31128
WRAP53	-0.2567	0.998205	0.000780259	0.94367	0.31452
UBR5	-0.22931	0.999995	2.17148e-06	0.51981	0.31962
EYA3	-0.17393	0.999995	2.17148e-06	0.90405	0.3202
ERCC4	-0.28601	0.999995	2.17148e-06	0.53142	0.32078
POLA1	-0.072225	0.999995	2.17148e-06	0.60705	0.32104
BAZ1A	-0.13445	0.999995	2.17148e-06	0.89968	0.32123
RNF168	-0.2547	0.999995	2.17148e-06	0.85576	0.32435
UBE2I	-0.1918	0.999995	2.17148e-06	0.34409	0.32702
MBTD1	-0.28006	0.999995	2.17148e-06	0.83239	0.33028
MTA2	-0.19989	0.999995	2.17148e-06	0.58712	0.33555
MMS22L	-0.25149	0.999995	2.17148e-06	0.88594	0.337
BRD8	-0.28182	0.999995	2.17148e-06	0.74823	0.34246
ENDOV	-0.37863	0.999995	2.17148e-06	0.68288	0.34423
RBBP7	-0.30959	0.999995	2.17148e-06	0.87124	0.34488
FBXO22	-0.38976	0.999995	2.17148e-06	0.37586	0.34809
POLD1	-0.21023	0.999995	2.17148e-06	0.51394	0.34892
CHAF1A	-0.25618	0.999995	2.17148e-06	0.86529	0.35011
RNF138	0.059541	0.999995	2.17148e-06	0.62295	0.35066
ID3	-0.246	0.999995	2.17148e-06	0.65089	0.35262
OR5A2	-0.31053	0.999995	2.17148e-06	0.63766	0.35548
CSNK2A1	-0.36813	0.999995	2.17148e-06	0.52759	0.35633
C17orf70	-0.27662	0.999995	2.17148e-06	0.77783	0.35846
MVP	-0.16484	0.999995	2.17148e-06	0.82286	0.35936
CUL2	-0.3216	0.999995	2.17148e-06	0.8742	0.36098
ATRIP	-0.16731	0.999995	2.17148e-06	0.95624	0.36127
TOP2B	-0.20426	0.999995	2.17148e-06	0.66749	0.36662
RRM1	-0.17657	0.999995	2.17148e-06	0.93314	0.36881
NSMCE4A	-0.23186	0.999995	2.17148e-06	0.84781	0.3709
USP22	-0.23032	0.999995	2.17148e-06	0.98079	0.37282
MCRS1	-0.28131	0.999995	2.17148e-06	0.89695	0.37339
OR1D5	-0.17176	0.999995	2.17148e-06	0.87221	0.37591
UBB	-0.14895	0.999995	2.17148e-06	0.62431	0.37796
MDC1	-0.27852	0.999995	2.17148e-06	0.95611	0.37924
PPP6C	0.031603	0.681339	0.166637	0.10719	0.38149
TDP1	-0.1847	0.999995	2.17148e-06	0.1475	0.38417
CUL3	-0.19969	0.999995	2.17148e-06	0.11258	0.38523
PARP14	0.048037	0.89373	0.0487937	0.29415	0.388
SMC5	0.019259	0.999995	2.17148e-06	0.55418	0.39112
ARID1A	-0.036664	0.999995	2.17148e-06	0.39998	0.39196
MCM10	-0.16885	0.999995	2.17148e-06	0.72252	0.39325
NFE2L2	-0.12723	0.999995	2.17148e-06	0.59064	0.39668
GABBR1	-0.28798	0.999995	2.17148e-06	0.79757	0.39811
EEPD1	-0.35111	0.999995	2.17148e-06	0.63258	0.39916
PAXIP1	-0.27691	0.999995	2.17148e-06	0.55906	0.39934
SUMO2	-0.16609	0.999995	2.17148e-06	0.78306	0.39998
MARK3	-0.18581	0.999995	2.17148e-06	0.6743	0.40171
SETD8	-0.34923	0.999995	2.17148e-06	0.9096	0.40279
SLFN11	0.42217	0.779016	0.108454	0.1682	0.40514
CCNH	-0.16737	0.999995	2.17148e-06	0.96264	0.40665
BAP1	-0.19713	0.999995	2.17148e-06	0.87287	0.40839
KMT2A	-0.069677	0.999995	2.17148e-06	0.5487	0.41121
KDM4A	0.032924	0.999995	2.17148e-06	0.58619	0.41187
SMARCC2	0.11904	0.999995	2.17148e-06	0.50463	0.41428
HELQ	-0.17867	0.999995	2.17148e-06	0.76472	0.41467
DTX3	-0.14799	0.999995	2.17148e-06	0.40023	0.41628
RPAIN	-0.41046	0.999995	2.17148e-06	0.83522	0.41768
CXXC1	-0.22848	0.999995	2.17148e-06	0.95038	0.41963
OR6B2	-0.26563	0.999995	2.17148e-06	0.72546	0.42305
MUM1	-0.19454	0.999995	2.17148e-06	0.78447	0.42458
SKIV2L2	-0.21775	0.999995	2.17148e-06	0.75631	0.42722
UBE2D4	-0.17894	0.999995	2.17148e-06	0.7357	0.42811
ALKBH2	-0.14272	0.999995	2.17148e-06	0.33087	0.43169
NEK6	-0.16623	0.999995	2.17148e-06	0.62917	0.43229
INO80B	-0.17659	0.999995	2.17148e-06	0.7991	0.43583
NSMCE1	-0.19724	0.999995	2.17148e-06	0.58531	0.43618
NOTCH2	-0.19	0.999995	2.17148e-06	0.47446	0.44329
H2AFX	-0.11088	0.999995	2.17148e-06	0.66429	0.44551
BRAP	-0.20199	0.999995	2.17148e-06	0.90579	0.44958
DNAJC2	-0.17929	0.999995	2.17148e-06	0.23795	0.44995
CDC7	-0.016793	0.999995	2.17148e-06	0.59769	0.45031
CDKL5	-0.0030455	0.999995	2.17148e-06	0.44419	0.45043
DCAF11	-0.10307	0.999995	2.17148e-06	0.64976	0.4509
CRY2	-0.14448	0.999995	2.17148e-06	0.76309	0.45141
WHSC1	-0.1507	0.999995	2.17148e-06	0.69191	0.45588
POLG2	-0.14986	0.999995	2.17148e-06	0.69955	0.45992
ZBTB32	-0.078506	0.999995	2.17148e-06	0.81798	0.46072
TRAIP	-0.20114	0.999995	2.17148e-06	0.69994	0.46402
DTX2	-0.11757	0.999995	2.17148e-06	0.58085	0.46406
BPTF	-0.1145	0.999995	2.17148e-06	0.19511	0.47286
OTUD7B	-0.12572	0.999995	2.17148e-06	0.74343	0.47335
INO80C	-0.13536	0.999995	2.17148e-06	0.78442	0.4742
MSH5	-0.15062	0.999995	2.17148e-06	0.91144	0.47528
CDC25A	-0.12425	0.999995	2.17148e-06	0.8802	0.48317
XRCC6BP1	-0.15152	0.999995	2.17148e-06	0.51025	0.48469
NFRKB	-0.14706	0.999995	2.17148e-06	0.58405	0.48519
NTHL1	-0.12635	0.999995	2.17148e-06	0.87864	0.48615
SUPT4H1	-0.15667	0.999995	2.17148e-06	0.93773	0.48734
EXO1	-0.053907	0.999995	2.17148e-06	0.82783	0.48934
EXO5	0.13873	0.999995	2.17148e-06	0.42517	0.49158
NEIL2	-0.15108	0.999995	2.17148e-06	0.97368	0.49256
USP1	-0.12693	0.999995	2.17148e-06	0.88962	0.49372
PARK7	-0.11971	0.999995	2.17148e-06	0.58642	0.49415
CBX1	0.02836	0.999995	2.17148e-06	0.74312	0.49745
NLK	-0.10209	0.999995	2.17148e-06	0.91996	0.49783
OR52H1	-0.14058	0.999995	2.17148e-06	0.30853	0.49864
HIPK1	-0.14245	0.999995	2.17148e-06	0.56074	0.49915
Luciferase	0	0.999995	2.17148e-06	0.49992	0.49992
SF3B1	-0.086164	0.999995	2.17148e-06	0.23036	0.50044
PRDM10	-0.079024	0.999995	2.17148e-06	0.69793	0.50094
CSNK2A2	-0.10928	0.999995	2.17148e-06	0.42043	0.50113
CNOT7	-0.083006	0.999995	2.17148e-06	0.67365	0.50141
USP47	0.023191	0.999995	2.17148e-06	0.49786	0.5019
RINN1	-0.087365	0.999995	2.17148e-06	0.82665	0.50339
DCLRE1C	-0.11406	0.999995	2.17148e-06	0.75254	0.50441
GLG1	0.1622	0.785202	0.105019	0.17729	0.50533
OR13C2	-0.096283	0.999995	2.17148e-06	0.2338	0.50602
SMEK2	-0.15724	0.999995	2.17148e-06	0.77874	0.50684
CBX3	-0.024577	0.999995	2.17148e-06	0.5546	0.50697
SMARCA2	0.11802	0.999995	2.17148e-06	0.51123	0.51047
RAD21	0.20251	0.999995	2.17148e-06	0.38007	0.51394
BRD4	-0.084545	0.999995	2.17148e-06	0.76639	0.51565
OR8G1	0.25137	0.903323	0.0441569	0.29898	0.51599
RFC1	0.037435	0.999995	2.17148e-06	0.43846	0.51747
FIGNL1	-0.054899	0.999995	2.17148e-06	0.72834	0.51911
SIRT7	-0.093332	0.999995	2.17148e-06	0.67532	0.52024
RPA3	0.0235	0.999995	2.17148e-06	0.55117	0.52093
OR10H3	-0.1031	0.999995	2.17148e-06	0.62229	0.52608
TTI1	-0.14622	0.999995	2.17148e-06	0.79561	0.52839
SUMO4	-0.035473	0.999995	2.17148e-06	0.15149	0.53323
OR10AD1	0.32008	0.888095	0.0515406	0.2781	0.53401
WEE1	-0.047346	0.999995	2.17148e-06	0.81512	0.53891
SMARCE1	0.36525	0.765645	0.115973	0.14913	0.53926
TDG	-0.056522	0.999995	2.17148e-06	0.67145	0.54686
XAB2	-0.074079	0.999995	2.17148e-06	0.88675	0.55117
PARP3	-0.16594	0.999995	2.17148e-06	0.79864	0.55545
OR56A3	-0.1026	0.999995	2.17148e-06	0.79973	0.55651
ERCC6L2	-0.044601	0.999995	2.17148e-06	0.89711	0.55675
SMARCA5	0.032974	0.999995	2.17148e-06	0.46304	0.55849
OR4N5	-0.18056	0.999995	2.17148e-06	0.79937	0.5622
CDK2	-0.1144	0.999995	2.17148e-06	0.68319	0.56877
MCM9	-0.10701	0.999995	2.17148e-06	0.88642	0.56949
IGHMBP2	0.055112	0.999995	2.17148e-06	0.51166	0.57235
PPP6R2	0.1708	0.785202	0.105019	0.17173	0.5742
CXorf57	-0.011654	0.999995	2.17148e-06	0.53974	0.57518
UNG	-0.09841	0.999995	2.17148e-06	0.43219	0.57725
HERC2	0.045211	0.999995	2.17148e-06	0.79193	0.5788
ENY2	0.028107	0.999995	2.17148e-06	0.66745	0.58078
NFATC2IP	0.0068501	0.999995	2.17148e-06	0.87772	0.58154
RAD52	-0.11667	0.999995	2.17148e-06	0.45502	0.58162
WDR76	0.039454	0.999995	2.17148e-06	0.45595	0.58303
PER1	-0.12638	0.999995	2.17148e-06	0.54238	0.58458
C9orf142	0.072598	0.999995	2.17148e-06	0.78634	0.58692
MAPK14	0.0090943	0.999995	2.17148e-06	0.46502	0.58779
ALKBH3	0.53526	0.544165	0.264269	0.051097	0.58856
PGBD5	0.083791	0.999995	2.17148e-06	0.47827	0.58885
HELB	0.05499	0.999995	2.17148e-06	0.56612	0.59024
BLM	-0.055081	0.999995	2.17148e-06	0.90093	0.59096
RAD51AP1	0.24735	0.89373	0.0487937	0.29373	0.59103
BRD7	0.037662	0.983502	0.00722475	0.35767	0.59231
REV1	0.080357	0.999995	2.17148e-06	0.65793	0.59244
MTA1	0.057651	0.999995	2.17148e-06	0.51699	0.59353
CRY1	0.0018402	0.974636	0.0111576	0.34142	0.59433
PAPD7	0.068899	0.89373	0.0487937	0.28997	0.59824
OR1E1	-0.049894	0.999995	2.17148e-06	0.72485	0.59842
PMS2	0.15165	0.999995	2.17148e-06	0.47906	0.59957
NEDD8	-0.036094	0.999995	2.17148e-06	0.85596	0.60102
H2AFZ	0.14848	0.999995	2.17148e-06	0.47639	0.60164
BAZ1B	-0.022545	0.999995	2.17148e-06	0.61724	0.6017
RNF111	0.20222	0.556662	0.254408	0.056931	0.60335
ANKRD28	0.58004	0.601532	0.220741	0.0686	0.60357
OR6C74	0.0706	0.806066	0.0936294	0.19934	0.60639
NEK9	-0.11748	0.999995	2.17148e-06	0.70457	0.60901
OR2B11	0.18369	0.829164	0.0813596	0.21329	0.61868
RAD51B	0.03675	0.999995	2.17148e-06	0.68146	0.61893
NEIL3	0.094781	0.999995	2.17148e-06	0.44581	0.61964
OR8B8	0.072417	0.999995	2.17148e-06	0.81881	0.61997
MCM8	0.20371	0.806066	0.0936294	0.19818	0.62039
FANCL	0.089502	0.999995	2.17148e-06	0.41573	0.62276
FANCA	0.099727	0.999995	2.17148e-06	0.60835	0.62572
PARG	0.013983	0.934804	0.0292794	0.31579	0.62745
MUTYH	-0.019997	0.999995	2.17148e-06	0.59579	0.62873
PMP22	0.003211	0.982338	0.00773906	0.35214	0.63106
OR4P4	0.71587	0.364225	0.43863	0.013238	0.63299
ZMYM3	0.17106	0.999995	2.17148e-06	0.45836	0.63356
EME2	-0.13408	0.999995	2.17148e-06	0.92827	0.63477
TOP3B	-0.088188	0.999995	2.17148e-06	0.77453	0.63521
CHFR	0.15973	0.785202	0.105019	0.17713	0.63558
C15orf41	0.215	0.888095	0.0515406	0.27628	0.63578
TRIM65	0.015768	0.999995	2.17148e-06	0.61135	0.63647
FANCI	-0.091234	0.999995	2.17148e-06	0.753	0.63844
RMI1	0.091547	0.999995	2.17148e-06	0.57561	0.63916
APOBEC2	-0.11221	0.999995	2.17148e-06	0.70843	0.6417
PINX1	0.19638	0.999995	2.17148e-06	0.43883	0.64693
RFC5	-0.065859	0.999995	2.17148e-06	0.84806	0.64705
BRD1	0.16706	0.999995	2.17148e-06	0.46087	0.64721
XRCC4	0.32643	0.82379	0.0841835	0.21105	0.64753
XPC	0.1803	0.888095	0.0515406	0.26839	0.64817
SUV420H1	0.33694	0.765645	0.115973	0.16089	0.65301
CLK2	-0.055998	0.999995	2.17148e-06	0.77607	0.65305
OR5AN1	0.16892	0.999995	2.17148e-06	0.43259	0.65453
PRKCG	0.58331	0.672959	0.172011	0.097329	0.656
ZDHHC16	-0.10941	0.999995	2.17148e-06	0.93915	0.65832
C20orf196	-0.10042	0.999995	2.17148e-06	0.66624	0.65875
OR2V2	0.058224	0.999995	2.17148e-06	0.68696	0.66033
SUMO1	-0.056614	0.999995	2.17148e-06	0.90054	0.66065
UBA3	-0.010215	0.999995	2.17148e-06	0.71965	0.66344
TREX2	0.46644	0.688169	0.162305	0.11446	0.66585
APTX	-0.0868	0.999995	2.17148e-06	0.48032	0.66703
HDAC10	0.32296	0.888095	0.0515406	0.28441	0.66737
FBXO18	-0.094705	0.999995	2.17148e-06	0.69852	0.67013
MSH6	0.048246	0.999995	2.17148e-06	0.61334	0.67057
FAF1	-0.10657	0.999995	2.17148e-06	0.84103	0.67064
XRCC1	-0.017618	0.999995	2.17148e-06	0.71888	0.67101
APOBEC3C	0.39881	0.751391	0.124134	0.13785	0.67218
CCNO	-0.13921	0.999995	2.17148e-06	0.65624	0.67249
RBX1	-0.12565	0.999995	2.17148e-06	0.79556	0.67267
C4orf27	0.16726	0.999995	2.17148e-06	0.44323	0.67412
CDK1	-0.05401	0.999995	2.17148e-06	0.73277	0.67566
BCLAF1	0.052364	0.999995	2.17148e-06	0.58211	0.67945
OR1I1	0.40608	0.850835	0.0701547	0.2336	0.68131
SIRT1	0.058817	0.999995	2.17148e-06	0.79656	0.68714
KDM5A	-0.0010178	0.999995	2.17148e-06	0.69979	0.6882
OR6C6	0.59411	0.72157	0.141722	0.12104	0.6885
BEND3	0.10647	0.999995	2.17148e-06	0.70775	0.68955
MLH1	-0.074594	0.999995	2.17148e-06	0.81058	0.69051
GTF2H3	-0.016699	0.999995	2.17148e-06	0.2453	0.69054
TNP1	-0.074057	0.999995	2.17148e-06	0.82953	0.69163
ANKRD52	-0.06574	0.999995	2.17148e-06	0.94142	0.69191
OR8J3	0.042377	0.999995	2.17148e-06	0.78142	0.69199
DLGAP5	0.41239	0.785202	0.105019	0.17339	0.69404
BOD1L1	-0.013173	0.999995	2.17148e-06	0.79732	0.69449
OR51I2	0.020956	0.999995	2.17148e-06	0.66681	0.69514
XPA	0.040699	0.999995	2.17148e-06	0.57487	0.69598
STRA13	0.025177	0.999995	2.17148e-06	0.70262	0.69652
TADA2B	0.474	0.806066	0.0936294	0.20001	0.69732
OR5T1	0.39448	0.848951	0.0711174	0.2289	0.69928
SCAI	-0.07638	0.999995	2.17148e-06	0.59669	0.69973
TP53BP1	0.67275	0.324431	0.488878	0.0074429	0.70054
OR9I1	0.21709	0.806066	0.0936294	0.19388	0.70143
LIG1	-0.0038442	0.999995	2.17148e-06	0.7266	0.70569
APOBEC3B	0.15761	0.999995	2.17148e-06	0.44272	0.70829
FANCB	0.41051	0.834434	0.078608	0.21591	0.70958
CUL4A	0.01126	0.999995	2.17148e-06	0.70768	0.71272
SSBP2	-0.057481	0.999995	2.17148e-06	0.83536	0.71346
PARP9	0.14185	0.999995	2.17148e-06	0.49999	0.71455
APOBEC3G	-0.019821	0.999995	2.17148e-06	0.62474	0.71589
HMGB1	0.24187	0.903323	0.0441569	0.29955	0.71748
KAT2B	0.072163	0.999995	2.17148e-06	0.67313	0.71778
OR6K2	0.35172	0.958344	0.0184786	0.32968	0.7185
ERCC6	0.1531	0.999995	2.17148e-06	0.44612	0.71895
UBE2K	0.2913	0.785202	0.105019	0.17988	0.72102
CCNB2	-0.0064003	0.999995	2.17148e-06	0.78579	0.72115
AUNIP	0.039765	0.999995	2.17148e-06	0.60926	0.72168
USP13	0.0097759	0.999995	2.17148e-06	0.39434	0.72204
HUS1B	0.40006	0.681339	0.166637	0.10672	0.72257
MRE11A	0.14894	0.765645	0.115973	0.15512	0.72297
POLR2G	-0.014172	0.999995	2.17148e-06	0.83691	0.72361
OR10S1	0.14616	0.999995	2.17148e-06	0.45368	0.72503
PIAS3	-0.011367	0.999995	2.17148e-06	0.84031	0.72539
OR5AR1	0.5489	0.601532	0.220741	0.068118	0.72697
RNF113B	0.075649	0.999995	2.17148e-06	0.65305	0.72788
OR2T10	0.26284	0.974636	0.0111576	0.34333	0.72875
CCND3	-0.10635	0.999995	2.17148e-06	0.89083	0.72907
ADH5	0.02363	0.999995	2.17148e-06	0.81215	0.72943
OR8G2	0.039726	0.999995	2.17148e-06	0.83222	0.72975
HDAC2	0.16816	0.999995	2.17148e-06	0.4413	0.73033
OR2T29	0.030129	0.999995	2.17148e-06	0.65242	0.73191
USP44	0.048925	0.999995	2.17148e-06	0.74971	0.7372
TEP1	-0.037505	0.999995	2.17148e-06	0.77915	0.73855
OR4C46	0.34422	0.867503	0.061729	0.24963	0.73884
MSH2	0.091147	0.999995	2.17148e-06	0.63304	0.73902
CCNB1	0.25871	0.971698	0.0124687	0.33728	0.73923
H2AFY2	0.033262	0.858724	0.0661464	0.24145	0.73955
SHFM1	0.23659	0.969282	0.0135499	0.33544	0.74037
IP6K3	0.040177	0.999995	2.17148e-06	0.57788	0.74041
PIAS4	0.1098	0.999995	2.17148e-06	0.6287	0.74193
OR2F2	0.13608	0.999995	2.17148e-06	0.47349	0.74202
ASH2L	0.00042999	0.999995	2.17148e-06	0.69414	0.74348
WRN	0.15495	0.999995	2.17148e-06	0.46242	0.7445
USP51	0.10809	0.999995	2.17148e-06	0.43107	0.74459
FANCE	-0.089419	0.999995	2.17148e-06	0.91087	0.74607
OR52L1	-0.095192	0.999995	2.17148e-06	0.6961	0.74785
HMGB2	0.093944	0.999995	2.17148e-06	0.63965	0.74897
OR4A47	0.54774	0.848951	0.0711174	0.2273	0.7506
PIAS1	0.21815	0.867029	0.0619664	0.24721	0.75117
PPP4R4	0.29823	0.888095	0.0515406	0.28229	0.75134
CNOT4	0.48419	0.819686	0.0863525	0.20831	0.75223
OR52M1	0.096121	0.999995	2.17148e-06	0.65731	0.75245
POLM	0.10419	0.999995	2.17148e-06	0.72741	0.7528
OR4A5	-0.060568	0.999995	2.17148e-06	0.56139	0.75308
SMC1B	0.27169	0.601532	0.220741	0.067606	0.75453
OR4D1	0.34221	0.858724	0.0661464	0.24123	0.75454
FOXN3	0.24862	0.999995	2.17148e-06	0.37354	0.75482
RING1	0.31922	0.888095	0.0515406	0.26867	0.75504
TCEA1	0.01863	0.999995	2.17148e-06	0.82252	0.75923
NCAPH	0.058974	0.999995	2.17148e-06	0.81303	0.75932
RNF17	0.44683	0.498887	0.301998	0.037746	0.75969
CHEK2	0.6693	0.364225	0.43863	0.014015	0.7606
RNF169	0.29894	0.765645	0.115973	0.16151	0.76087
ZMPSTE24	-0.039219	0.999995	2.17148e-06	0.5823	0.76294
HES1	0.11973	0.999995	2.17148e-06	0.49451	0.7643
ALKBH1	0.099059	0.879637	0.0556965	0.25978	0.76495
MORF4L2	0.10193	0.999995	2.17148e-06	0.50467	0.76508
NHEJ1	0.46367	0.681339	0.166637	0.11195	0.76735
EYA1	0.24594	0.989685	0.00450301	0.36295	0.76768
OR11H6	0.078497	0.999995	2.17148e-06	0.64558	0.76927
USP3	0.1505	0.999995	2.17148e-06	0.44773	0.77109
USP48	0.35086	0.888095	0.0515406	0.28353	0.77144
CDKN2D	0.3307	0.681339	0.166637	0.11262	0.77157
ZSWIM7	0.057785	0.999995	2.17148e-06	0.39478	0.77192
PINK1	-0.018807	0.999995	2.17148e-06	0.89006	0.77212
ASH1L	0.19816	0.94901	0.0227292	0.32549	0.77224
UBE2V2	0.010987	0.999995	2.17148e-06	0.72777	0.77226
CASP3	0.047129	0.999995	2.17148e-06	0.87799	0.77243
ZNF827	0.27787	0.889251	0.0509756	0.2857	0.77362
SLX4IP	0.15178	0.999995	2.17148e-06	0.50752	0.77421
RFC2	0.09373	0.999995	2.17148e-06	0.69766	0.77522
CEP63	0.28116	0.785202	0.105019	0.17207	0.77604
UBE2V1	-0.032464	0.999995	2.17148e-06	0.62132	0.77691
OR2L13	0.30953	0.85776	0.0666342	0.23925	0.77783
NABP1	0.19114	0.888095	0.0515406	0.27479	0.77972
OR7D4	0.048195	0.999995	2.17148e-06	0.75712	0.77975
EID3	0.16519	0.983502	0.00722475	0.35757	0.78003
OR2L2	0.54721	0.601532	0.220741	0.070341	0.78049
NOTCH4	0.11133	0.999995	2.17148e-06	0.52998	0.78081
PARP4	0.24144	0.983502	0.00722475	0.3551	0.78114
CDKN1B	0.13687	0.999995	2.17148e-06	0.49004	0.78155
RECQL	0.30346	0.89373	0.0487937	0.29452	0.78175
APEX1	-0.038326	0.999995	2.17148e-06	0.90492	0.78217
AICDA	0.12276	0.999995	2.17148e-06	0.48364	0.78224
DMC1	0.35733	0.838528	0.0764824	0.21916	0.78256
ARID2	-0.092417	0.999995	2.17148e-06	0.68355	0.78258
HNRNPUL2	0.020461	0.999995	2.17148e-06	0.54374	0.78284
HDAC4	0.040226	0.934804	0.0292794	0.31479	0.78568
CDC25B	-0.077055	0.999995	2.17148e-06	0.79375	0.78868
ANKRD32	0.19952	0.888095	0.0515406	0.27538	0.78879
OR10R2	0.35561	0.817862	0.08732	0.20667	0.78955
ALDH2	0.39136	0.879637	0.0556965	0.25907	0.79049
RAD51C	0.4743	0.62696	0.20276	0.081685	0.79058
RASSF7	0.32302	0.806066	0.0936294	0.19523	0.79074
DBF4	-0.016836	0.999995	2.17148e-06	0.79908	0.7917
OR6K3	0.097604	0.999995	2.17148e-06	0.51543	0.79212
OR13J1	0.10367	0.999995	2.17148e-06	0.6584	0.7931
KDM4D	0.10296	0.888095	0.0515406	0.27826	0.79345
ING4	-0.029359	0.999995	2.17148e-06	0.28119	0.79548
POLK	0.34779	0.806066	0.0936294	0.19789	0.79595
BRDT	0.35772	0.888095	0.0515406	0.26937	0.79649
TAF6L	-0.038365	0.999995	2.17148e-06	0.64457	0.79755
MAPK8	0.33371	0.807623	0.0927913	0.20274	0.79854
KLHL15	0.13557	0.999995	2.17148e-06	0.51457	0.79874
FAM122A	0.0093146	0.999995	2.17148e-06	0.87006	0.80034
ESCO2	0.28238	0.934804	0.0292794	0.31271	0.80094
RPA4	0.08273	0.999995	2.17148e-06	0.61622	0.80364
RFWD3	-0.092525	0.999995	2.17148e-06	0.78485	0.80376
SENP2	0.046011	0.999995	2.17148e-06	0.67346	0.8041
CCND2	0.2128	0.999995	2.17148e-06	0.37772	0.80458
PHF11	0.35327	0.888095	0.0515406	0.28185	0.80502
TREX1	0.22409	0.983502	0.00722475	0.35366	0.80663
MLH3	0.095354	0.999995	2.17148e-06	0.67512	0.80697
UBE2A	-0.018495	0.999995	2.17148e-06	0.69162	0.80736
RAD23B	0.1674	0.999995	2.17148e-06	0.47518	0.80758
ASF1B	0.20204	0.976841	0.0101761	0.34714	0.80803
CUL5	0.71622	0.364225	0.43863	0.012716	0.80915
EME1	0.012641	0.999995	2.17148e-06	0.70358	0.8124
COPS4	0.20051	0.974636	0.0111576	0.33939	0.81512
SIRT6	0.18797	0.848951	0.0711174	0.2244	0.81646
POT1	-0.056584	0.999995	2.17148e-06	0.93376	0.81668
APOBEC3F	0.22417	0.999995	2.17148e-06	0.43652	0.81757
MSH3	0.49062	0.608611	0.21566	0.075448	0.81766
CCNB3	0.11315	0.806066	0.0936294	0.19904	0.8189
OR56B1	0.26854	0.948051	0.0231683	0.32418	0.81904
RNF2	0.33736	0.681215	0.166716	0.10204	0.81907
SMC6	0.30547	0.888095	0.0515406	0.28394	0.82066
ACTR8	0.00031337	0.999995	2.17148e-06	0.85732	0.8218
OR52R1	0.14688	0.999995	2.17148e-06	0.51934	0.82241
APAF1	0.16236	0.888095	0.0515406	0.28108	0.82273
TRIM34	-0.032683	0.999995	2.17148e-06	0.62569	0.82298
SMARCAL1	0.15213	0.888095	0.0515406	0.28064	0.82303
HFM1	0.2289	0.888095	0.0515406	0.27978	0.82368
H2AFY	0.15422	0.888095	0.0515406	0.27939	0.82395
WRNIP1	0.11119	0.999995	2.17148e-06	0.67805	0.82477
MGMT	0.077642	0.999995	2.17148e-06	0.62126	0.82585
HDAC9	0.16947	0.879637	0.0556965	0.25822	0.8259
KIAA1586	0.7598	0.18381	0.735631	0.0028483	0.82604
OR9G1	0.35767	0.850835	0.0701547	0.23556	0.82809
OR8G5	0.50113	0.765645	0.115973	0.1556	0.82926
LATS2	0.98578	0.098268	1.00759	0.0011167	0.83063
RMI2	-0.023559	0.999995	2.17148e-06	0.58123	0.8312
EYA2	0.43378	0.867503	0.061729	0.24825	0.83292
NBN	0.57375	0.498887	0.301998	0.030987	0.83513
OR8U1	0.26866	0.999995	2.17148e-06	0.49186	0.83691
ETAA1	0.18615	0.850835	0.0701547	0.23421	0.83719
NOTCH1	0.24609	0.879637	0.0556965	0.25989	0.83864
UBE2W	0.19291	0.888095	0.0515406	0.28044	0.84014
OR51G2	0.07414	0.999995	2.17148e-06	0.60247	0.84379
RAD18	0.35549	0.785202	0.105019	0.18089	0.84672
TAF9	0.15044	0.62696	0.20276	0.083456	0.84824
POLB	0.36087	0.529291	0.276305	0.046148	0.8483
SMUG1	0.33336	0.837812	0.0768534	0.21811	0.84921
NUDT1	0.083224	0.999995	2.17148e-06	0.52029	0.84966
RNF10	0.12611	0.999995	2.17148e-06	0.46033	0.84978
MPG	0.18193	0.999995	2.17148e-06	0.41876	0.8503
CCNE1	0.025687	0.999995	2.17148e-06	0.8679	0.85244
ASF1A	0.38736	0.888095	0.0515406	0.28345	0.8527
SFR1	0.051126	0.999995	2.17148e-06	0.83458	0.85388
CHD1L	0.089524	0.999995	2.17148e-06	0.61044	0.85508
UBE2U	0.26335	0.850835	0.0701547	0.23502	0.85513
SETMAR	0.19919	0.806066	0.0936294	0.19403	0.85598
RNF7	0.76644	0.364225	0.43863	0.012775	0.8561
RAD54B	0.11683	0.999995	2.17148e-06	0.48754	0.85708
ZMYND8	0.36271	0.848951	0.0711174	0.22683	0.85753
NEK1	0.19556	0.791725	0.101426	0.18403	0.85877
CEP57	0.16925	0.999995	2.17148e-06	0.44367	0.85902
SMARCAD1	0.19841	0.871582	0.0596917	0.25211	0.85916
CTCF	0.074042	0.999995	2.17148e-06	0.50538	0.8603
SAMHD1	0.45575	0.62696	0.20276	0.083958	0.86082
OR10V1	0.13676	0.999995	2.17148e-06	0.48008	0.86179
MUS81	0.04628	0.999995	2.17148e-06	0.59166	0.86244
PARP2	0.25376	0.785202	0.105019	0.17941	0.86323
DDB2	0.2809	0.785202	0.105019	0.17481	0.86345
OPRM1	0.37182	0.72157	0.141722	0.12324	0.86346
DCLRE1A	0.18107	0.999995	2.17148e-06	0.40864	0.86439
OR1L6	0.26652	0.845388	0.0729439	0.22183	0.86463
PIN1	0.082329	0.999995	2.17148e-06	0.65602	0.86482
COL1A1	0.1988	0.806066	0.0936294	0.19452	0.86636
CDKN2A	0.32479	0.817862	0.08732	0.207	0.86652
DCUN1D2	0.47373	0.659819	0.180575	0.093384	0.86677
AKAP8	0.033252	0.999995	2.17148e-06	0.4616	0.8679
NOTCH3	0.36372	0.62696	0.20276	0.086005	0.86928
OR1A2	0.27958	0.858724	0.0661464	0.24271	0.86972
ANKRD44	0.26345	0.879637	0.0556965	0.25746	0.87018
MB21D1	0.44227	0.806066	0.0936294	0.19663	0.87124
OR8B3	0.34657	0.785202	0.105019	0.17825	0.87449
CSNK1D	0.20136	0.999995	2.17148e-06	0.46533	0.87593
PER2	0.040955	0.999995	2.17148e-06	0.82777	0.87708
COPS7A	0.44523	0.498887	0.301998	0.036998	0.87814
SUMO3	0.23885	0.82379	0.0841835	0.211	0.87821
C11orf30	0.30032	0.858724	0.0661464	0.24307	0.87864
MPZ	0.35722	0.806592	0.0933461	0.20165	0.87933
NABP2	0.29942	0.765645	0.115973	0.15178	0.87977
HDAC1	0.0065888	0.999995	2.17148e-06	0.83211	0.87996
PMS1	0.45502	0.62696	0.20276	0.079137	0.88003
CIB1	0.2513	0.999995	2.17148e-06	0.39252	0.8802
CDC34	0.26285	0.974636	0.0111576	0.3446	0.88258
DNTT	0.08923	0.999995	2.17148e-06	0.5694	0.88258
POLG	0.027179	0.999995	2.17148e-06	0.59229	0.88408
BRCA2	0.08623	0.999995	2.17148e-06	0.44415	0.88477
RECQL5	0.14282	0.999995	2.17148e-06	0.47214	0.88545
GEN1	0.19653	0.999995	2.17148e-06	0.3916	0.88613
CEP164	0.25674	0.765645	0.115973	0.16215	0.88686
C7orf49	0.20185	0.999995	2.17148e-06	0.39066	0.88713
FAN1	0.17143	0.999995	2.17148e-06	0.48902	0.88821
PPP4R1	0.084439	0.999995	2.17148e-06	0.48027	0.88831
APC	0.14062	0.498887	0.301998	0.039163	0.89292
OR52B4	0.46785	0.785202	0.105019	0.18068	0.89308
CSNK1E	0.22138	0.983502	0.00722475	0.35631	0.89361
TP73	0.30325	0.785202	0.105019	0.17699	0.89549
SETX	0.18608	0.999995	2.17148e-06	0.39545	0.89634
SP140	0.46736	0.765645	0.115973	0.15402	0.89684
USP45	0.55553	0.498887	0.301998	0.039182	0.8976
PAK1	0.14628	0.999995	2.17148e-06	0.42342	0.89792
SSBP1	0.20714	0.974636	0.0111576	0.34535	0.89808
CDK8	0.19684	0.999995	2.17148e-06	0.41281	0.89824
INO80E	0.1986	0.765645	0.115973	0.15919	0.89847
OR13A1	0.17079	0.999995	2.17148e-06	0.42485	0.89921
EZH2	0.50777	0.566007	0.247178	0.058673	0.89968
CDK12	0.084343	0.999995	2.17148e-06	0.64862	0.89993
PML	0.44465	0.681339	0.166637	0.10999	0.90064
RNF126	0.18534	0.999995	2.17148e-06	0.42152	0.90131
ZRANB3	0.30587	0.934804	0.0292794	0.31508	0.90166
APITD1	0.076248	0.999995	2.17148e-06	0.55562	0.90197
ZNF451	0.31787	0.974636	0.0111576	0.34385	0.90284
APOBEC3D	0.30902	0.756541	0.121168	0.14113	0.90307
OR6B1	0.16032	0.879637	0.0556965	0.25923	0.90599
TNKS	0.15757	0.999995	2.17148e-06	0.46651	0.90616
OR1E2	0.094208	0.785202	0.105019	0.17357	0.90632
CBX4	0.088773	0.89373	0.0487937	0.29088	0.90663
UVSSA	0.19339	0.999995	2.17148e-06	0.437	0.90721
OR10Z1	0.25743	0.983502	0.00722475	0.35865	0.90742
COL21A1	0.05121	0.999995	2.17148e-06	0.81749	0.90846
SIRT3	0.25151	0.94798	0.0232008	0.32269	0.90907
BMI1	0.1889	0.806066	0.0936294	0.20068	0.90937
OR7G3	0.48376	0.765645	0.115973	0.16068	0.9096
CCNC	0.22154	0.848951	0.0711174	0.22808	0.91034
RAG1	0.31724	0.765645	0.115973	0.15339	0.91079
FANCD2	0.19606	0.999995	2.17148e-06	0.47058	0.91311
COPS2	0.13269	0.999995	2.17148e-06	0.51274	0.91395
TYMS	0.085245	0.999995	2.17148e-06	0.64075	0.91395
LIG3	0.21877	0.999995	2.17148e-06	0.40361	0.91485
RAG2	0.37522	0.89373	0.0487937	0.28911	0.91557
OR51B4	0.24396	0.848951	0.0711174	0.22843	0.91674
ASCC1	0.17935	0.999995	2.17148e-06	0.38905	0.91707
TPP1	0.22194	0.999995	2.17148e-06	0.43354	0.91744
POLN	0.29143	0.867503	0.061729	0.25003	0.91829
RHO	0.52385	0.681339	0.166637	0.10475	0.91966
PPP6R3	0.31535	0.756541	0.121168	0.1421	0.9211
C1orf115	0.16213	0.999995	2.17148e-06	0.4294	0.92373
APBB1	0.37345	0.608611	0.21566	0.075133	0.92411
SIRT4	0.37407	0.62696	0.20276	0.083525	0.92439
SENP8	0.56117	0.37712	0.42352	0.015609	0.92486
DCUN1D4	0.20496	0.98745	0.00548489	0.36111	0.92539
EXD2	0.34558	0.888095	0.0515406	0.27787	0.9266
DCUN1D5	0.36194	0.548251	0.261021	0.054914	0.92682
OR10G2	0.241	0.779016	0.108454	0.16814	0.92701
UIMC1	0.33675	0.724063	0.140224	0.12641	0.92745
PBRM1	0.15455	0.999995	2.17148e-06	0.50145	0.92775
FOXO3	0.49733	0.601532	0.220741	0.065314	0.92794
RAD9B	0.019915	0.999995	2.17148e-06	0.41447	0.92827
TCEB2	0.2998	0.768539	0.114334	0.16355	0.9299
UHRF2	0.19735	0.999995	2.17148e-06	0.43228	0.93025
STAG2	0.65635	0.524821	0.279989	0.043374	0.93063
HIPK2	0.18181	0.848951	0.0711174	0.22881	0.93088
MBD4	0.38254	0.488745	0.310918	0.02777	0.93109
OR52B6	0.22039	0.765645	0.115973	0.15945	0.93112
GADD45A	0.29263	0.790625	0.102029	0.18295	0.93163
PTEN	0.73088	0.096667	1.01472	0.00099862	0.93191
SP100	0.18083	0.765645	0.115973	0.15781	0.93199
OR51F1	0.4367	0.62696	0.20276	0.08565	0.93216
ATXN7	0.22254	0.765645	0.115973	0.15584	0.93293
TP63	0.32202	0.765645	0.115973	0.16179	0.93376
PIAS2	0.51367	0.751391	0.124134	0.13716	0.93384
SENP7	0.18824	0.765645	0.115973	0.15354	0.93391
OR4F6	0.23329	0.765645	0.115973	0.15187	0.93465
NEK8	0.27333	0.89373	0.0487937	0.2945	0.9353
SCAF11	0.13876	0.981076	0.00829735	0.35067	0.93598
POLD4	0.4046	0.681339	0.166637	0.11089	0.93673
OR52K1	0.46895	0.678671	0.168341	0.09968	0.9371
DTX4	0.25662	0.765645	0.115973	0.14567	0.93736
PIF1	0.33643	0.681339	0.166637	0.10836	0.93809
UCHL3	0.12797	0.888095	0.0515406	0.27752	0.93843
SUV39H2	0.18125	0.759225	0.119629	0.14353	0.93851
RAD54L	0.20119	0.756541	0.121168	0.14224	0.93904
USP15	0.40868	0.667386	0.175623	0.095833	0.94014
SUV420H2	0.22183	0.999995	2.17148e-06	0.42228	0.94032
SPIDR	0.22358	0.753365	0.122995	0.13931	0.94054
UBE2B	0.23052	0.751391	0.124134	0.13795	0.94122
DTX1	0.28609	0.800358	0.0967157	0.18686	0.94126
SIRT5	0.22346	0.751391	0.124134	0.13657	0.94188
SMARCA4	0.14533	0.999995	2.17148e-06	0.49841	0.94195
OR6N2	0.49714	0.678671	0.168341	0.10096	0.94212
RBM7	0.16572	0.999995	2.17148e-06	0.51567	0.94287
CETN2	0.39098	0.72157	0.141722	0.12494	0.94293
OR5L1	0.6027	0.62696	0.20276	0.080672	0.94344
OR6K6	0.3838	0.744214	0.128302	0.13224	0.94411
RAD54L2	0.39968	0.743052	0.128981	0.13126	0.94451
PPP6R1	0.20681	0.94798	0.0232008	0.32129	0.94472
PSIP1	0.098068	0.999995	2.17148e-06	0.52985	0.94532
TDP2	0.18035	0.731849	0.135579	0.12853	0.94557
SHPRH	0.23765	0.72157	0.141722	0.12523	0.94718
OR6C68	0.37236	0.657598	0.18204	0.09239	0.94744
FAM175A	0.38474	0.72157	0.141722	0.12422	0.94753
USP11	0.33339	0.72157	0.141722	0.1231	0.94807
SMARCD1	0.36548	0.72157	0.141722	0.12217	0.94849
PPP5C	0.20041	0.999995	2.17148e-06	0.55839	0.94903
INO80D	0.29498	0.850835	0.0701547	0.23284	0.94918
AMN1	0.37288	0.751391	0.124134	0.13666	0.95011
PER3	0.23049	0.89373	0.0487937	0.29223	0.95026
TOPORS	0.21895	0.94798	0.0232008	0.32317	0.95083
USP26	0.34152	0.601532	0.220741	0.071463	0.95104
OR1N1	0.56068	0.498887	0.301998	0.03386	0.95332
BABAM1	0.14787	0.678671	0.168341	0.10011	0.95387
PHIP	0.25614	0.681339	0.166637	0.11008	0.9542
ERCC8	0.23816	0.785202	0.105019	0.17681	0.95449
CUL9	0.3746	0.681339	0.166637	0.1088	0.9548
FBXW7	0.2975	0.681339	0.166637	0.10678	0.95561
PAGR1	0.14133	0.979807	0.00885946	0.34921	0.95575
OR5R1	0.54193	0.678671	0.168341	0.10077	0.95827
POLI	0.48248	0.529447	0.276178	0.047585	0.95938
USP4	0.6494	0.498887	0.301998	0.037707	0.95953
MAPKAPK2	0.33486	0.681339	0.166637	0.10784	0.96008
APOBEC1	0.10651	0.999995	2.17148e-06	0.60749	0.96069
OR5F1	0.41163	0.648501	0.188089	0.090442	0.96242
APLF	0.18371	0.999995	2.17148e-06	0.48803	0.96245
RHNO1	0.25566	0.640476	0.193497	0.088661	0.96325
TET2	0.6408	0.402922	0.394779	0.018315	0.96377
SETDB1	0.35214	0.765645	0.115973	0.15382	0.96418
HLTF	0.50895	0.62696	0.20276	0.086142	0.96431
OR5L2	0.49865	0.62696	0.20276	0.085483	0.96446
OR52B2	0.44802	0.62696	0.20276	0.085099	0.96465
STAG1	0.56489	0.62696	0.20276	0.084047	0.96511
KAT2A	0.32811	0.626879	0.202816	0.07836	0.96754
ATF2	0.53824	0.548251	0.261021	0.055377	0.96885
OR6X1	0.41284	0.608611	0.21566	0.07472	0.96905
PRMT8	0.30104	0.663665	0.178051	0.094613	0.96948
RNF165	0.5137	0.529291	0.276305	0.046945	0.96957
OR4C45	0.29541	0.602176	0.220277	0.072162	0.97052
CUL7	0.45949	0.601532	0.220741	0.071237	0.97062
OR5B3	0.52212	0.601532	0.220741	0.070892	0.97111
TCEB1	0.29533	0.601532	0.220741	0.0692	0.97201
RAP1A	0.28484	0.601532	0.220741	0.067478	0.97274
DCUN1D1	0.27848	0.806066	0.0936294	0.19415	0.97345
CUL4B	0.62266	0.529291	0.276305	0.046561	0.97387
PHF3	0.3613	0.599405	0.22228	0.064399	0.97407
OR4K1	0.57355	0.391473	0.407298	0.01739	0.97484
OR10A7	0.56666	0.528219	0.277186	0.0442	0.97515
CHD3	0.48192	0.681339	0.166637	0.10852	0.97606
UBE2F	0.51902	0.567087	0.24635	0.059755	0.97612
OR4C11	0.48827	0.519048	0.284792	0.042134	0.97627
EYA4	0.30324	0.566007	0.247178	0.059056	0.97639
USP34	0.18459	0.608611	0.21566	0.074857	0.97667
OR10Q1	0.3135	0.548251	0.261021	0.055298	0.97805
USP14	0.44564	0.601532	0.220741	0.069997	0.97816
OR4K14	0.44507	0.498887	0.301998	0.039468	0.97818
PARK2	0.61752	0.498887	0.301998	0.030495	0.97855
DCUN1D3	0.65119	0.317381	0.498419	0.0061934	0.97871
OR5AK2	0.4359	0.548251	0.261021	0.054108	0.97875
FAM175B	0.62438	0.498887	0.301998	0.038454	0.97878
SALL4	0.081955	0.999995	2.17148e-06	0.46126	0.97881
APOBEC3A	0.28695	0.548251	0.261021	0.053606	0.97897
PRIMPOL	0.60381	0.548251	0.261021	0.052976	0.97927
LATS1	0.5311	0.362081	0.441194	0.01005	0.97936
OR51I1	0.43727	0.498887	0.301998	0.036467	0.97977
OR56A1	0.34327	0.544165	0.264269	0.051156	0.97988
OR4D5	0.53445	0.498887	0.301998	0.036152	0.97993
OR6V1	0.34406	0.544165	0.264269	0.050999	0.97998
PARP15	0.3368	0.573509	0.24146	0.061024	0.98122
DTX3L	0.44361	0.681339	0.166637	0.10421	0.98142
OR52N5	0.35116	0.529291	0.276305	0.047024	0.98151
OR51M1	0.38393	0.529291	0.276305	0.046857	0.98156
OR4D6	0.57346	0.498887	0.301998	0.030879	0.98274
UBE2D2	0.31658	0.806066	0.0936294	0.18954	0.98441
OR10T2	0.40915	0.498887	0.301998	0.039684	0.98474
GADD45G	0.35116	0.544165	0.264269	0.049729	0.98496
PARPBP	0.74351	0.487213	0.312281	0.027179	0.98501
NEK11	0.35945	0.519048	0.284792	0.04236	0.98528
SPTBN1	0.47909	0.498887	0.301998	0.038356	0.98528
TRAPPC13	0.58312	0.48581	0.313534	0.025093	0.98641
TRIM29	0.49004	0.498887	0.301998	0.034617	0.98659
OR1F1	0.40672	0.498887	0.301998	0.034548	0.98666
OR1L4	0.4961	0.498887	0.301998	0.031666	0.98795
OTUB2	0.52234	0.437609	0.358914	0.021965	0.98822
PRDM9	1.0305	0.413678	0.383338	0.020086	0.98933
SCAF4	0.43878	0.498887	0.301998	0.036762	0.98963
CCNA1	0.38778	0.498887	0.301998	0.036624	0.98966
OR4L1	0.59678	0.487213	0.312281	0.025831	0.99031
ABL1	0.59762	0.487213	0.312281	0.026707	0.99075
PTPN2	0.34763	0.498887	0.301998	0.029846	0.99175
DPY30	0.36953	0.493793	0.306455	0.028567	0.99209
OR8D2	0.45566	0.413678	0.383338	0.019712	0.99251
OR5M10	0.67845	0.364225	0.43863	0.013986	0.99258
UBE2R2	0.30279	0.487213	0.312281	0.027061	0.99316
BRE	0.53459	0.391473	0.407298	0.017016	0.99349
TAOK3	0.47965	0.37712	0.42352	0.015973	0.9939
OR6C4	0.47618	0.364225	0.43863	0.01434	0.99445
MSH4	0.43521	0.413678	0.383338	0.019682	0.99466
SCAF8	0.29564	0.437609	0.358914	0.022152	0.99473
ATM	0.52912	0.364225	0.43863	0.014674	0.99477
ATXN3	0.72664	0.364225	0.43863	0.013071	0.99494
UBE2D1	0.73827	0.364225	0.43863	0.012785	0.99507
OR52A5	0.75919	0.317381	0.498419	0.0063312	0.99606
OR4F15	0.55296	0.362081	0.441194	0.0097452	0.99626
BRCC3	0.49805	0.362081	0.441194	0.0090073	0.99658
SPO11	0.48069	0.364225	0.43863	0.012441	0.99668
C10orf12	0.25963	0.364225	0.43863	0.012648	0.99701
OR13C4	0.53651	0.324431	0.488878	0.0071675	0.99718
CREBBP	0.50815	0.364225	0.43863	0.011801	0.99721
THRAP3	0.47426	0.362081	0.441194	0.010099	0.99732
OR4K17	0.47087	0.317381	0.498419	0.0065575	0.99754
RRM2B	0.63341	0.317381	0.498419	0.0063607	0.99764
HPRT1	0.56055	0.324431	0.488878	0.0077086	0.99828
Scrambled	0.33224	0.548251	0.261021	0.055505	0.99849
OR5M9	0.62247	0.20506	0.688119	0.0033894	0.99867
OR4B1	0.50552	0.167007	0.777265	0.0024154	0.99914
RNF146	1.147	0.06131	1.21247	0.00050669	0.99946
OR8K3	0.69551	0.105861	0.975264	0.0014217	0.9995
OR5AP2	0.64316	0.10119	0.994862	0.0012544	0.9996
TAOK2	0.91524	0.073545	1.13345	0.00068379	0.9998
TRIP12	1.1479	0.02619	1.58186	0.00016234	0.99989
KEAP1	0.94921	0.06131	1.21247	0.00047717	0.9999
CDKN1A	1.2086	0.01619	1.79075	8.3628e-05	0.99993
CAND1	1.1311	0.00119	2.92445	4.9193e-06	1
EP300	1.6413	0.00119	2.92445	4.9193e-06	1
TP53	2.1974	0.00119	2.92445	4.9193e-06	1
USP28	0.91893	0.00119	2.92445	4.9193e-06	1

## Sheet: LTRI|MDACC, WT
Gene	lfc	fdr	fdr_log10	pos_p	neg_p
ABL1	1.1709	0.743272	0.128852	0.057636	0.98362
ACD	-0.11695	0.999995	2.17148e-06	0.56609	0.72727
ACTL6A	-1.0683	0.43988	0.356666	0.97296	0.067132
ACTR5	-2.1288	0.477908	0.320656	0.96327	0.075868
ACTR8	-0.42306	0.999995	2.17148e-06	0.87723	0.49016
ADH5	0.20553	0.970234	0.0131235	0.30132	0.57776
AICDA	0.89132	0.792164	0.101185	0.12122	0.93856
AKAP8	0.60636	0.999995	2.17148e-06	0.41519	0.86578
ALDH2	-0.35077	0.999995	2.17148e-06	0.78242	0.72382
ALKBH1	-0.083203	0.999995	2.17148e-06	0.62566	0.83312
ALKBH2	-0.044427	0.999995	2.17148e-06	0.38912	0.81537
ALKBH3	0.91445	0.957987	0.0186404	0.25649	0.78592
AMN1	1.4762	0.533163	0.27314	0.027773	0.95847
ANKRD28	0.63288	0.999995	2.17148e-06	0.68404	0.90826
ANKRD32	0.70561	0.92928	0.0318534	0.23406	0.85218
ANKRD44	0.25911	0.999995	2.17148e-06	0.63319	0.82073
ANKRD52	-0.78747	0.57918	0.237186	0.95527	0.10817
ANP32E	0.34759	0.999995	2.17148e-06	0.37239	0.70194
APAF1	0.53036	0.999995	2.17148e-06	0.63637	0.94679
APBB1	1.2495	0.696627	0.157	0.052043	0.85603
APC	0.84468	0.896459	0.0474696	0.21239	0.93134
APEX1	-0.076054	0.999995	2.17148e-06	0.92486	0.76099
APEX2	-4.0375	0.078125	1.10721	0.99971	0.0013686
APITD1
APLF	0.42435	0.999995	2.17148e-06	0.73427	0.93831
APOBEC1	0.83688	0.999995	2.17148e-06	0.33882	0.98535
APOBEC2	0.95745	0.957987	0.0186404	0.25385	0.97955
APOBEC3A	0.59638	0.999995	2.17148e-06	0.34243	0.9626
APOBEC3B	0.688	0.999995	2.17148e-06	0.61408	0.60837
APOBEC3C	-0.17897	0.999995	2.17148e-06	0.88498	0.60011
APOBEC3D	0.88644	0.79318	0.100628	0.1292	0.77969
APOBEC3F	1.1225	0.839738	0.0758562	0.16308	0.96848
APOBEC3G	0.21409	0.960493	0.0175058	0.27568	0.91301
APOBEC3H	0.97641	0.839738	0.0758562	0.15516	0.93037
APTX	0.36664	0.948558	0.0229361	0.24411	0.63768
ARID1A	-0.28277	0.999995	2.17148e-06	0.8656	0.67464
ARID1B	0.42786	0.999995	2.17148e-06	0.65484	0.81292
ARID2	1.2783	0.789763	0.102503	0.10313	0.72896
ASCC1	0.14687	0.999995	2.17148e-06	0.40944	0.76654
ASF1A	0.030433	0.999995	2.17148e-06	0.73887	0.85293
ASF1B	0.68933	0.999995	2.17148e-06	0.39429	0.061183
ASH1L	0.51917	0.999995	2.17148e-06	0.42345	0.61308
ASH2L	-0.2874	0.999995	2.17148e-06	0.61122	0.5033
ATAD5	-0.95662	0.847203	0.0720125	0.72048	0.21881
ATF2	1.1433	0.765785	0.115893	0.067834	0.9772
ATM	0.92536	0.792164	0.101185	0.11651	0.79792
ATMIN	-0.30841	0.999995	2.17148e-06	0.69994	0.50216
ATR	-1.3365	0.813383	0.0897049	0.7527	0.20484
ATRIP	-0.86895	0.999995	2.17148e-06	0.60859	0.43925
ATRX	-1.5267	0.199074	0.700985	0.99587	0.01551
ATXN3	1.5008	0.491667	0.308329	0.023148	0.99367
ATXN7	0.79049	0.999995	2.17148e-06	0.38991	0.93741
AUNIP	-0.80434	0.999995	2.17148e-06	0.95787	0.37186
BABAM1	0.29349	0.957987	0.0186404	0.25846	0.90301
BAP1	-0.41749	0.999995	2.17148e-06	0.75855	0.58598
BARD1	-3.203	0.31129	0.506835	0.62975	0.036182
BAZ1A	-0.07236	0.999995	2.17148e-06	0.65306	0.63132
BAZ1B	-0.93906	0.880735	0.0551547	0.95163	0.23217
BCAS2	-0.60098	0.999995	2.17148e-06	0.91774	0.52227
BCCIP	-3.5712	0.147865	0.830135	0.91342	0.0077325
BCLAF1	-0.6202	0.999995	2.17148e-06	0.72015	0.51836
BEND3	1.1237	0.789763	0.102503	0.085749	0.70826
BLM	0.24306	0.753414	0.122966	0.064158	0.67165
BMI1	0.081434	0.999995	2.17148e-06	0.42949	0.70136
BOD1L1	-0.28066	0.999995	2.17148e-06	0.56004	0.34141
BPTF	0.34312	0.999995	2.17148e-06	0.70548	0.3881
BRAP	-1.1925	0.704346	0.152214	0.10452	0.15484
BRAT1	-0.96046	0.695522	0.157689	0.14221	0.14947
BRCA1	-2.8234	0.143015	0.844618	0.99834	0.0069716
BRCA2	-0.27804	0.999995	2.17148e-06	0.79563	0.74848
BRCC3	2.0948	0.249339	0.60321	0.0055289	0.97163
BRD1	1.2996	0.789763	0.102503	0.10353	0.64624
BRD2	-1.2834	0.918544	0.0369	0.90525	0.24858
BRD4	-1.0036	0.999995	2.17148e-06	0.94607	0.35656
BRD7	2.0957	0.225051	0.647719	0.0043035	0.99307
BRD8	-4.0536	0.161164	0.792732	0.87743	0.009116
BRDT	0.58826	0.960493	0.0175058	0.2669	0.89482
BRE	0.96837	0.789763	0.102503	0.091451	0.97624
BRIP1	-1.5434	0.778546	0.108716	0.78184	0.18482
BTG2	-0.16945	0.999995	2.17148e-06	0.31284	0.68851
BUB1B	-2.4695	0.14411	0.841306	0.99829	0.0072285
C10orf12	0.29634	0.909832	0.0410388	0.2243	0.73167
C11orf30	-0.64395	0.999995	2.17148e-06	0.81879	0.30702
C15orf41	-0.10426	0.999995	2.17148e-06	0.88561	0.58331
C17orf70	-2.1921	0.361073	0.442405	0.85578	0.047013
C19orf40	-1.0896	0.929344	0.0318235	0.91205	0.25391
C1orf115	1.1772	0.792164	0.101185	0.10704	0.98301
C1orf86	0.1083	0.999995	2.17148e-06	0.64572	0.49265
C20orf196	-0.48616	0.999995	2.17148e-06	0.96561	0.59523
C4orf27	0.34669	0.950124	0.0222197	0.25046	0.82878
C7orf49	-1.513	0.57291	0.241914	0.98065	0.10405
C9orf142	0.22508	0.999995	2.17148e-06	0.71562	0.9074
CAND1	4.1625	0.002315	2.63545	4.9409e-06	1
CASP3	1.105	0.743272	0.128852	0.056964	0.68398
CBX1	0.33152	0.979706	0.00890423	0.31383	0.79197
CBX3	-0.82	0.999995	2.17148e-06	0.4168	0.29179
CBX4	1.322	0.743272	0.128852	0.059493	0.8604
CBX5	-0.082359	0.999995	2.17148e-06	0.61331	0.35957
CCDC101	-1.2105	0.388709	0.410375	0.98381	0.053515
CCNA1	0.65079	0.999995	2.17148e-06	0.32711	0.95779
CCNA2	-4.8389	0.078125	1.10721	0.98255	0.0016651
CCNB1	-0.3214	0.999995	2.17148e-06	0.92403	0.67881
CCNB2	-0.1336	0.999995	2.17148e-06	0.81117	0.79095
CCNB3	-2.6315	0.535122	0.271547	0.7573	0.090512
CCNC	-0.07401	0.999995	2.17148e-06	0.66322	0.74457
CCND1	-1.7838	0.184199	0.734713	0.99681	0.011992
CCND2	-0.23036	0.999995	2.17148e-06	0.70714	0.4367
CCND3	-0.29275	0.999995	2.17148e-06	0.72133	0.47981
CCNE1	1.1334	0.436562	0.359954	0.015994	0.99575
CCNH	-3.1666	0.31129	0.506835	0.98686	0.035718
CCNO	1.0552	0.789763	0.102503	0.096363	0.81868
CDC25A	0.23626	0.960493	0.0175058	0.2901	0.67731
CDC25B	-0.18716	0.999995	2.17148e-06	0.3956	0.39745
CDC34	-0.053936	0.999995	2.17148e-06	0.41697	0.62241
CDC5L	-0.81189	0.999995	2.17148e-06	0.86897	0.31864
CDC7	-4.9623	0.029321	1.53282	0.99999	9.3877e-05
CDCA5	-2.9613	0.24763	0.606197	0.99399	0.022199
CDK1	-2.2334	0.394215	0.404267	0.61216	0.055442
CDK12	-1.0951	0.721854	0.141551	0.98092	0.16486
CDK2	0.27399	0.999995	2.17148e-06	0.55491	0.71213
CDK4	-2.2552	0.256892	0.590249	0.99334	0.024126
CDK7	-2.2298	0.481265	0.317616	0.91556	0.077044
CDK8	1.1829	0.689815	0.161267	0.050797	0.3064
CDK9	-2.5009	0.195183	0.709558	0.99635	0.01378
CDKL5	1.5315	0.205729	0.686704	0.003424	0.99932
CDKN1A	3.2196	0.002315	2.63545	4.9409e-06	1
CDKN1B	2.0676	0.145202	0.838027	0.0017046	0.99962
CDKN2A	0.98568	0.839738	0.0758562	0.16555	0.88678
CDKN2D	-0.016642	0.999995	2.17148e-06	0.79362	0.91486
CEP164	0.44091	0.999995	2.17148e-06	0.49491	0.81626
CEP57	-1.0874	0.361073	0.442405	0.98604	0.046993
CEP63	-0.11238	0.999995	2.17148e-06	0.5427	0.56605
CETN2	0.56613	0.999995	2.17148e-06	0.40194	0.55108
CHAF1A	-1.959	0.309736	0.509008	0.99087	0.033109
CHAF1B	-2.9411	0.318461	0.496944	0.53536	0.037971
CHD1L	0.88715	0.906743	0.0425158	0.22257	0.73918
CHD3	1.313	0.778314	0.108845	0.074128	0.96366
CHD4
CHEK1	-1.3252	0.701185	0.154167	0.50244	0.15266
CHEK2	1.0738	0.789763	0.102503	0.089267	0.59826
CHFR	0.065975	0.999995	2.17148e-06	0.72283	0.86233
CHRAC1	0.25337	0.814087	0.0893292	0.13814	0.57117
CHTF18	-0.84943	0.999995	2.17148e-06	0.13206	0.37501
CIB1	-0.7022	0.999995	2.17148e-06	0.4012	0.46267
CLK2	-0.21101	0.999995	2.17148e-06	0.7647	0.79689
CLSPN	-0.8078	0.999995	2.17148e-06	0.97715	0.46305
CNOT4	-0.033076	0.999995	2.17148e-06	0.6108	0.85578
CNOT7	-0.27713	0.999995	2.17148e-06	0.87687	0.54592
COL1A1	-0.70423	0.999995	2.17148e-06	0.65911	0.49108
COL21A1	0.83881	0.472994	0.325144	0.020865	0.99438
COPS2	-0.88468	0.829672	0.0810936	0.95633	0.21157
COPS3	-1.8586	0.309736	0.509008	0.99077	0.033524
COPS4	-0.90017	0.999995	2.17148e-06	0.95481	0.35423
COPS5	-2.5089	0.161164	0.792732	0.99773	0.0090073
COPS6	-1.9491	0.565853	0.247296	0.49348	0.099643
COPS7A	0.78221	0.863729	0.0636225	0.19727	0.98479
COPS7B	0.73937	0.957987	0.0186404	0.25969	0.88344
COPS8	-1.053	0.813383	0.0897049	0.5915	0.20352
CREBBP	-0.75197	0.999995	2.17148e-06	0.36919	0.30352
CRY1	0.5805	0.999995	2.17148e-06	0.46747	0.97527
CRY2	-0.58376	0.999995	2.17148e-06	0.82281	0.54551
CSNK1D	1.5197	0.326582	0.486008	0.0081574	0.99801
CSNK1E	1.0228	0.789763	0.102503	0.097548	0.98693
CSNK2A1	-0.0097704	0.999995	2.17148e-06	0.64632	0.75136
CSNK2A2	1.1146	0.500503	0.300593	0.024571	0.99325
CSNK2B	-1.0558	0.794706	0.0997935	0.94462	0.19219
CTC1	-1.6501	0.57918	0.237186	0.92254	0.10751
CTCF	-2.5535	0.394215	0.404267	0.97191	0.055956
CUL1	-1.0475	0.849623	0.0707737	0.64253	0.22034
CUL2	-3.841	0.137217	0.862592	0.99887	0.0051731
CUL3	2.6672	0.225051	0.647719	0.0043233	0.99831
CUL4A	-0.33415	0.999995	2.17148e-06	0.8195	0.80019
CUL4B	0.079515	0.999995	2.17148e-06	0.67371	0.79279
CUL5	1.8627	0.328333	0.483685	0.0087602	0.86997
CUL7	1.0869	0.789763	0.102503	0.091728	0.85534
CUL9	0.85527	0.960493	0.0175058	0.27612	0.88455
CXXC1	-1.3189	0.678205	0.168639	0.95405	0.13969
CXorf57	-0.80074	0.217963	0.661617	0.73119	0.017446
DAXX	-0.93966	0.999995	2.17148e-06	0.76314	0.29644
DBF4	-1.6174	0.318961	0.496262	0.98491	0.039147
DCAF11	1.458	0.476637	0.321812	0.021873	0.99408
DCLRE1A	0.023061	0.999995	2.17148e-06	0.53892	0.47204
DCLRE1B	-3.5634	0.166748	0.777939	0.994	0.010144
DCLRE1C	0.38492	0.999995	2.17148e-06	0.78822	0.67795
DCUN1D1	0.87555	0.835451	0.078079	0.14567	0.93089
DCUN1D2	0.93482	0.960493	0.0175058	0.27696	0.86772
DCUN1D3	2.3218	0.118981	0.924522	0.0012698	0.82045
DCUN1D4	-0.76914	0.952294	0.021229	0.79901	0.27034
DCUN1D5	0.8423	0.999995	2.17148e-06	0.33345	0.98454
DDB1	-2.7832	0.26817	0.57159	0.8222	0.026617
DDB2
DDX1	-2.1696	0.684782	0.164448	0.33756	0.14251
DDX11	-1.7145	0.264092	0.578245	0.99297	0.025648
DICER1	-1.0809	0.813383	0.0897049	0.94486	0.20486
DKC1	-5.6829	0.011574	1.93652	1	2.4705e-05
DLGAP5	-1.0015	0.945126	0.0245103	0.91157	0.26527
DMC1	0.97889	0.839738	0.0758562	0.17077	0.71355
DNA2	-0.057766	0.999995	2.17148e-06	0.76497	0.32035
DNAJC2	0.32036	0.79318	0.100628	0.12805	0.27828
DNMT1	-0.8121	0.971863	0.012395	0.26792	0.28036
DNTT	0.23665	0.999995	2.17148e-06	0.54953	0.84152
DPY30	0.20497	0.999995	2.17148e-06	0.57491	0.58468
DROSHA	-1.4394	0.721244	0.141918	0.78764	0.16333
DSCC1	-2.1334	0.169727	0.770249	0.99721	0.010687
DTX1	1.2151	0.789763	0.102503	0.090789	0.97583
DTX2	-0.45838	0.999995	2.17148e-06	0.84116	0.39568
DTX3	0.77775	0.999995	2.17148e-06	0.36682	0.92545
DTX3L	-0.18918	0.999995	2.17148e-06	0.39306	0.59662
DTX4	0.89925	0.637053	0.195824	0.038188	0.88281
DUT	-3.1064	0.37726	0.423359	0.88281	0.051084
DYNLL1	-2.3316	0.69372	0.158816	0.85525	0.14574
ECT2	-1.575	0.813383	0.0897049	0.59413	0.20358
EEPD1	0.77568	0.948558	0.0229361	0.24312	0.93421
EID3	0.36408	0.979706	0.00890423	0.31759	0.83355
EIF4A1	-1.5015	0.64522	0.190292	0.82313	0.12739
EME1	0.119	0.999995	2.17148e-06	0.69825	0.84703
EME2	0.42165	0.999995	2.17148e-06	0.44784	0.68744
ENDOV	-0.044226	0.999995	2.17148e-06	0.58489	0.54216
ENY2	0.14382	0.999995	2.17148e-06	0.78672	0.81839
EP300	1.9317	0.097222	1.01224	0.00093383	0.9998
EP400
ERCC1	-1.7362	0.163384	0.78679	0.99759	0.0094618
ERCC2	-2.0418	0.512296	0.290479	0.96756	0.084198
ERCC3	-2.9331	0.182948	0.737672	0.99696	0.011715
ERCC4	0.23234	0.999995	2.17148e-06	0.55822	0.75743
ERCC5	-1.5453	0.571307	0.24313	0.94179	0.10291
ERCC6	0.22597	0.84642	0.0724141	0.18236	0.8615
ERCC6L	-2.6362	0.37726	0.423359	0.97964	0.050639
ERCC6L2	-0.27544	0.999995	2.17148e-06	0.44542	0.81057
ERCC8	-1.8673	0.378074	0.422423	0.98443	0.051647
ESCO2	-1.4641	0.905641	0.0430439	0.97668	0.24013
ETAA1	0.7497	0.999995	2.17148e-06	0.4596	0.4614
EXD2	0.64047	0.960493	0.0175058	0.28703	0.93803
EXO1	-0.1878	0.999995	2.17148e-06	0.83011	0.83254
EXO5	0.13962	0.999995	2.17148e-06	0.52607	0.82132
EYA1	0.80089	0.950124	0.0222197	0.24789	0.52521
EYA2	0.11268	0.999995	2.17148e-06	0.6821	0.84002
EYA3	0.56023	0.999995	2.17148e-06	0.70882	0.94692
EYA4	0.44136	0.999995	2.17148e-06	0.58219	0.84467
EZH2	0.8199	0.999995	2.17148e-06	0.353	0.90324
FAF1	-1.1655	0.704346	0.152214	0.98008	0.15687
FAM122A	-0.17239	0.999995	2.17148e-06	0.72084	0.85268
FAM175A	-0.99344	0.778546	0.108716	0.7187	0.18477
FAM175B	0.91055	0.675028	0.170678	0.048268	0.88807
FAM178A	-1.0684	0.794706	0.0997935	0.47281	0.19492
FAM35A	-0.48004	0.999995	2.17148e-06	0.66568	0.51094
FAN1	0.48729	0.778314	0.108845	0.078121	0.77228
FANCA	-2.6167	0.31129	0.506835	0.98977	0.036212
FANCB	-0.58076	0.939851	0.026941	0.57808	0.25778
FANCC	-3.0848	0.195183	0.709558	0.42012	0.014373
FANCD2	-2.0437	0.512296	0.290479	0.92238	0.083931
FANCE	-1.9016	0.163384	0.78679	0.99757	0.0095903
FANCF	-2.5428	0.118364	0.92678	0.99923	0.0037897
FANCG	-0.49945	0.999995	2.17148e-06	0.68749	0.39653
FANCI	-0.43268	0.999995	2.17148e-06	0.63712	0.64709
FANCL	-1.6728	0.59785	0.223408	0.8876	0.11293
FANCM	-1.7615	0.637203	0.195722	0.20073	0.12502
FBXO18	0.26903	0.999995	2.17148e-06	0.62602	0.88389
FBXO22	0.78613	0.979706	0.00890423	0.31099	0.85695
FBXW7	1.1374	0.385536	0.413935	0.011932	0.99684
FEN1	-1.4251	0.704346	0.152214	0.85718	0.15689
FIGNL1	0.46049	0.905972	0.0428852	0.21986	0.86654
FOXM1	-0.036625	0.999995	2.17148e-06	0.04978	0.7778
FOXN3	-0.049863	0.999995	2.17148e-06	0.66734	0.54264
FOXO3	0.69039	0.979706	0.00890423	0.31492	0.80717
FZR1	-0.52205	0.999995	2.17148e-06	0.93665	0.73577
GABBR1	0.16267	0.999995	2.17148e-06	0.63163	0.90755
GADD45A	0.47888	0.999995	2.17148e-06	0.39965	0.8277
GADD45G	-0.27061	0.999995	2.17148e-06	0.91415	0.75778
GAR1	-2.0105	0.420994	0.375724	0.90567	0.062003
GEN1	-0.20755	0.999995	2.17148e-06	0.7965	0.74495
GLG1	0.45363	0.999995	2.17148e-06	0.59288	0.74953
GPI	0.066006	0.999995	2.17148e-06	0.59582	0.72043
GPS1	-1.8905	0.361073	0.442405	0.43388	0.047398
GTF2H1	-1.3789	0.257647	0.588975	0.99326	0.024472
GTF2H2
GTF2H3	-1.5339	0.373768	0.427398	0.98511	0.049463
GTF2H4	-2.0012	0.637203	0.195722	0.9301	0.12513
GTF2H5	-1.8734	0.256439	0.591016	0.99344	0.02381
H2AFX	-0.089602	0.999995	2.17148e-06	0.76294	0.71647
H2AFY	0.81106	0.839738	0.0758562	0.16411	0.7166
H2AFY2	-0.043197	0.999995	2.17148e-06	0.46068	0.51489
H2AFZ	1.7509	0.093254	1.03033	0.00069667	0.99986
H3F3A
H3F3B	-1.0543	0.999995	2.17148e-06	0.86462	0.40914
HDAC1	0.0079596	0.999995	2.17148e-06	0.66137	0.76724
HDAC10	0.1556	0.999995	2.17148e-06	0.62499	0.69535
HDAC2	0.09557	0.839738	0.0758562	0.1505	0.71271
HDAC3	-3.9381	0.255975	0.591802	0.85995	0.023494
HDAC4	0.41112	0.999995	2.17148e-06	0.41351	0.49928
HDAC9	0.59459	0.999995	2.17148e-06	0.37411	0.91044
HELB	0.84644	0.900525	0.0455042	0.21528	0.95333
HELLS	0.80981	0.999995	2.17148e-06	0.37881	0.91656
HELQ	0.46446	0.999995	2.17148e-06	0.66538	0.8794
HERC2	0.66459	0.999995	2.17148e-06	0.33817	0.87459
HES1	-0.40749	0.999995	2.17148e-06	0.10046	0.48808
HFM1	1.0249	0.789763	0.102503	0.097212	0.83471
HINFP	-6.3559	0.078125	1.10721	0.99929	0.0011908
HIPK1	0.82182	0.965625	0.0151915	0.29515	0.70702
HIPK2	0.92102	0.792164	0.101185	0.11897	0.91741
HLTF	1.2271	0.808222	0.0924693	0.13629	0.91342
HMGA1	0.84056	0.999995	2.17148e-06	0.42119	0.90342
HMGA2	0.66199	0.999995	2.17148e-06	0.47544	0.96854
HMGB1
HMGB2	0.46603	0.999995	2.17148e-06	0.39162	0.42387
HMGN1	2.396	0.611723	0.213445	0.034601	0.9659
HNRNPK	-1.9672	0.430589	0.365937	0.97262	0.064336
HNRNPUL1	0.44246	0.999995	2.17148e-06	0.33437	0.69138
HNRNPUL2	0.364	0.999995	2.17148e-06	0.54149	0.66512
HPRT1	-0.034144	0.999995	2.17148e-06	0.86868	0.88304
HUS1	-1.6116	0.778546	0.108716	0.80036	0.18529
HUS1B	0.80863	0.839738	0.0758562	0.17114	0.77471
HUWE1	-0.89659	0.942675	0.025638	0.061628	0.26046
ID3	0.22709	0.999995	2.17148e-06	0.62052	0.79997
IGHMBP2	-1.3531	0.704346	0.152214	0.70593	0.1555
ING4	-0.61284	0.999995	2.17148e-06	0.27322	0.43537
INO80	-1.2302	0.731246	0.135936	0.83663	0.16857
INO80B	-0.67769	0.999995	2.17148e-06	0.87808	0.42471
INO80C	-0.71418	0.999995	2.17148e-06	0.50563	0.48029
INO80D	0.35179	0.999995	2.17148e-06	0.46167	0.78035
INO80E	1.3286	0.318392	0.497038	0.0074756	0.99825
IP6K3	0.55133	0.999995	2.17148e-06	0.57451	0.95034
KAT2A	-1.0527	0.309736	0.509008	0.99056	0.034048
KAT2B	1.4569	0.205729	0.686704	0.003513	0.9993
KAT5	0.72802	0.857795	0.0666165	0.19042	0.33869
KAT8	-2.9842	0.434892	0.361619	0.96378	0.065759
KDM1A	-0.034414	0.999995	2.17148e-06	0.52838	0.44431
KDM2A	0.41978	0.979706	0.00890423	0.30562	0.91994
KDM4A	0.64407	0.999995	2.17148e-06	0.41237	0.78382
KDM4D	0.38771	0.598558	0.222894	0.033218	0.62988
KDM5A	0.77393	0.979706	0.00890423	0.3164	0.55629
KEAP1	3.3219	0.005787	2.23755	2.4705e-05	1
KIAA1586	-0.48205	0.999995	2.17148e-06	0.67087	0.72656
KLHL15	1.217	0.789763	0.102503	0.088892	0.61967
KMT2A	-1.1187	0.999995	2.17148e-06	0.9138	0.31058
L3MBTL1	0.39671	0.92928	0.0318534	0.2336	0.90579
LATS1	0.47256	0.999995	2.17148e-06	0.73059	0.93644
LATS2	1.5712	0.415621	0.381303	0.013375	0.99643
LIG1	0.74201	0.999995	2.17148e-06	0.45679	0.65653
LIG3	0.49698	0.999995	2.17148e-06	0.51869	0.9558
LIG4	0.70076	0.999995	2.17148e-06	0.42053	0.78973
LMNA	0.29273	0.999995	2.17148e-06	0.72947	0.37604
Luciferase
MAD2L2	-1.7137	0.69372	0.158816	0.96166	0.14638
MAPK14	0.51324	0.999995	2.17148e-06	0.39516	0.94706
MAPK8	0.73671	0.999995	2.17148e-06	0.36971	0.95294
MAPKAPK2	1.2934	0.59713	0.223931	0.031864	0.92282
MARK3	-0.34911	0.999995	2.17148e-06	0.96702	0.80868
MASTL	-1.2412	0.794706	0.0997935	0.92762	0.19507
MAU2	-1.537	0.571307	0.24313	0.58944	0.10235
MB21D1	0.63173	0.999995	2.17148e-06	0.48106	0.73525
MBD4	-0.40392	0.999995	2.17148e-06	0.67479	0.73804
MBTD1	-0.16694	0.999995	2.17148e-06	0.33925	0.55348
MCM10	-1.0536	0.31129	0.506835	0.98985	0.035846
MCM2	-1.4525	0.813383	0.0897049	0.93031	0.20189
MCM3	-1.502	0.361073	0.442405	0.98598	0.047092
MCM3AP	-1.2449	0.918544	0.0369	0.81015	0.24815
MCM4	-2.9817	0.118364	0.92678	0.99925	0.0037699
MCM5	-2.3442	0.243394	0.61369	0.99435	0.021053
MCM6	-2.6138	0.321799	0.492415	0.95607	0.039839
MCM7	-1.9505	0.671151	0.17318	0.75014	0.13681
MCM8	0.23347	0.792164	0.101185	0.1088	0.6426
MCM9	-1.1757	0.878557	0.0562301	0.9387	0.23021
MCPH1	-0.80517	0.999995	2.17148e-06	0.87583	0.4115
MCRS1	-1.066	0.999995	2.17148e-06	0.963	0.29987
MDC1	-0.58791	0.999995	2.17148e-06	0.64216	0.60154
MDM2	-3.3818	0.078125	1.10721	0.99959	0.0018528
MDM4	-1.1507	0.769607	0.113731	0.94114	0.17823
MEN1	-0.71952	0.999995	2.17148e-06	0.95193	0.4891
METTL3	-0.47475	0.999995	2.17148e-06	0.70781	0.39381
MGMT	0.89781	0.839738	0.0758562	0.16868	0.95743
MLH1	-0.747	0.999995	2.17148e-06	0.21069	0.38995
MLH3	0.76765	0.960493	0.0175058	0.27503	0.75263
MMS19	-1.8677	0.557729	0.253577	0.88656	0.097617
MMS22L	-2.2956	0.583202	0.234181	0.97327	0.10954
MNAT1	-0.75372	0.999995	2.17148e-06	0.81314	0.41666
MORF4L1	-0.04495	0.999995	2.17148e-06	0.89415	0.44933
MORF4L2	0.45184	0.999995	2.17148e-06	0.7371	0.82982
MPG	1.0173	0.792164	0.101185	0.12357	0.99183
MPLKIP	0.029183	0.999995	2.17148e-06	0.81976	0.4332
MPZ	0.41663	0.999995	2.17148e-06	0.53128	0.89583
MRE11A	-0.84847	0.999995	2.17148e-06	0.095009	0.35554
MSH2	0.9844	0.743272	0.128852	0.059088	0.85898
MSH3	-0.16732	0.999995	2.17148e-06	0.66234	0.75428
MSH4	0.46943	0.999995	2.17148e-06	0.42579	0.90207
MSH5	0.34016	0.999995	2.17148e-06	0.84436	0.66427
MSH6	1.3314	0.675028	0.170678	0.047596	0.93119
MTA1	-0.26745	0.999995	2.17148e-06	0.37504	0.39322
MTA2	0.098754	0.999995	2.17148e-06	0.83972	0.80898
MTA3	-0.56529	0.999995	2.17148e-06	0.073783	0.35784
MTOR	-4.4721	0.030556	1.5149	0.99997	0.0001334
MUM1	-0.14309	0.999995	2.17148e-06	0.93023	0.82471
MUS81	0.0020747	0.999995	2.17148e-06	0.87297	0.73138
MUTYH	-0.75978	0.999995	2.17148e-06	0.70927	0.31488
MVP	0.81743	0.84642	0.0724141	0.18247	0.92669
MYBBP1A	-2.2017	0.425493	0.371108	0.71453	0.06312
NABP1	0.12464	0.792164	0.101185	0.117	0.69049
NABP2	-0.079179	0.999995	2.17148e-06	0.080423	0.80608
NAE1	-0.50743	0.999995	2.17148e-06	0.95263	0.56592
NBN	-0.36947	0.999995	2.17148e-06	0.33391	0.31529
NCAPD2	-3.1083	0.137217	0.862592	0.99883	0.0052719
NCAPD3	-0.31911	0.999995	2.17148e-06	0.5452	0.53501
NCAPG	-2.6355	0.45514	0.341855	0.98044	0.070433
NCAPG2	-3.994	0.141144	0.850338	0.94835	0.0058747
NCAPH	-2.3663	0.472884	0.325245	0.73152	0.074188
NCAPH2	-1.9901	0.698937	0.155562	0.97707	0.15142
NDNL2	-3.1573	0.078125	1.10721	0.99972	0.0013489
NEDD8	-2.8088	0.535122	0.271547	0.87412	0.092024
NEIL1	-0.61502	0.999995	2.17148e-06	0.8352	0.38105
NEIL2	0.96702	0.870136	0.0604129	0.20151	0.61399
NEIL3	0.41602	0.999995	2.17148e-06	0.40008	0.90186
NEK1	-0.00036693	0.999995	2.17148e-06	0.53573	0.65775
NEK11	-0.14164	0.999995	2.17148e-06	0.67325	0.52954
NEK6	0.42885	0.999995	2.17148e-06	0.58174	0.87033
NEK8	0.46241	0.999995	2.17148e-06	0.34646	0.62189
NEK9	0.46341	0.999995	2.17148e-06	0.6572	0.87226
NELFB	-3.8403	0.078125	1.10721	0.9996	0.0018232
NFATC2IP	-0.36614	0.864356	0.0633073	0.76945	0.22508
NFE2L2	1.1312	0.778314	0.108845	0.074504	0.73727
NFRKB	0.024481	0.999995	2.17148e-06	0.40932	0.52432
NHEJ1	-0.77907	0.878557	0.0562301	0.91118	0.23066
NHP2	-3.2675	0.096536	1.01531	0.99942	0.0027817
NIPBL	-4.3275	0.078125	1.10721	0.99971	0.0013785
NLK	0.2801	0.999995	2.17148e-06	0.35222	0.9189
NONO	-3.9576	0.14294	0.844846	0.99631	0.006102
NOP10	-0.25675	0.999995	2.17148e-06	0.77907	0.47775
NOTCH1	1.186	0.789763	0.102503	0.10331	0.97948
NOTCH2	-0.27662	0.999995	2.17148e-06	0.78427	0.84091
NOTCH3	0.38751	0.999995	2.17148e-06	0.656	0.93929
NOTCH4	1.1917	0.839738	0.0758562	0.15588	0.96409
NPM1
NSMCE1	-1.5706	0.243394	0.61369	0.99438	0.020865
NSMCE2	-0.95651	0.945126	0.0245103	0.95116	0.26537
NSMCE4A	-0.40015	0.999995	2.17148e-06	0.71419	0.40841
NTHL1	-0.32554	0.999995	2.17148e-06	0.80072	0.53301
NUDT1	-0.49271	0.999995	2.17148e-06	0.59813	0.50008
NUDT16L1	0.074123	0.999995	2.17148e-06	0.43046	0.85222
OBFC1	-0.6427	0.999995	2.17148e-06	0.54922	0.36703
OGG1	1.0979	0.792164	0.101185	0.12141	0.43475
OPRM1	0.74761	0.999995	2.17148e-06	0.36075	0.57883
OR10A7	1.3094	0.436562	0.359954	0.015836	0.99582
OR10AD1	-0.49373	0.999995	2.17148e-06	0.89675	0.60329
OR10G2	0.04722	0.999995	2.17148e-06	0.38999	0.62949
OR10H3	1.0228	0.839738	0.0758562	0.17125	0.95469
OR10H5	0.67464	0.999995	2.17148e-06	0.70186	0.92378
OR10Q1	0.65099	0.999995	2.17148e-06	0.49194	0.63508
OR10R2	1.0685	0.533163	0.27314	0.027882	0.9924
OR10S1	1.2842	0.778314	0.108845	0.078911	0.90274
OR10T2	1.2908	0.675028	0.170678	0.045639	0.97861
OR10V1	-0.35233	0.999995	2.17148e-06	0.50525	0.76437
OR10Z1	0.89919	0.970234	0.0131235	0.30077	0.98519
OR11H1
OR11H6	1.2724	0.598558	0.222894	0.032605	0.91831
OR13A1	1.0206	0.863729	0.0636225	0.19594	0.9569
OR13C2
OR13C4	1.0156	0.839738	0.0758562	0.16119	0.80845
OR13J1	0.80463	0.893267	0.0490187	0.21021	0.9575
OR1A2	0.91636	0.800454	0.0966636	0.13412	0.70858
OR1D5	0.44454	0.999995	2.17148e-06	0.4747	0.83279
OR1E1	0.40817	0.999995	2.17148e-06	0.36627	0.90872
OR1E2	0.74475	0.979706	0.00890423	0.31873	0.83054
OR1F1	0.05604	0.999995	2.17148e-06	0.54773	0.51914
OR1I1	0.75422	0.886373	0.0523835	0.20717	0.96193
OR1L4	1.0317	0.789763	0.102503	0.093032	0.99165
OR1L6	1.1148	0.839884	0.0757807	0.17927	0.93023
OR1N1	0.67768	0.962229	0.0167216	0.29165	0.94211
OR2B11	0.68037	0.960493	0.0175058	0.27308	0.51759
OR2F2	0.74812	0.999995	2.17148e-06	0.42788	0.6933
OR2L13	1.3972	0.760002	0.119185	0.065699	0.86868
OR2L2	0.90079	0.950124	0.0222197	0.24956	0.94895
OR2T10	0.91267	0.857795	0.0666165	0.18724	0.98598
OR2T29
OR2T35
OR2V2	0.7711	0.999995	2.17148e-06	0.35619	0.91222
OR4A47	-0.1492	0.999995	2.17148e-06	0.87414	0.63378
OR4A5	-1.7862	0.69372	0.158816	0.91515	0.14659
OR4B1	-0.18123	0.999995	2.17148e-06	0.37806	0.82496
OR4C11	1.8238	0.352017	0.453436	0.010519	0.96859
OR4C45
OR4C46	0.59066	0.839738	0.0758562	0.16237	0.9322
OR4D1	-0.56965	0.999995	2.17148e-06	0.8907	0.49426
OR4D5	0.96679	0.789763	0.102503	0.090335	0.93513
OR4D6	1.4031	0.675028	0.170678	0.047042	0.89745
OR4F15	1.2335	0.789763	0.102503	0.08238	0.95537
OR4F21
OR4F6	0.615	0.979706	0.00890423	0.3189	0.90653
OR4K1	1.9116	0.46211	0.335255	0.018741	0.88498
OR4K14	1.3486	0.675028	0.170678	0.045026	0.94873
OR4K17	1.6891	0.637053	0.195824	0.039433	0.74037
OR4L1	0.87698	0.93583	0.028803	0.2367	0.92151
OR4N5	1.1772	0.839738	0.0758562	0.14793	0.96011
OR4P4	0.83573	0.79318	0.100628	0.13135	0.76549
OR51B4	0.70363	0.999995	2.17148e-06	0.46861	0.83016
OR51F1	1.1492	0.792164	0.101185	0.11808	0.73205
OR51G2	0.55498	0.999995	2.17148e-06	0.48375	0.9476
OR51I1	0.80686	0.672359	0.172399	0.043426	0.83972
OR51I2	0.38335	0.999995	2.17148e-06	0.62649	0.93057
OR51M1	1.0036	0.778314	0.108845	0.075887	0.86105
OR52A5	1.3051	0.778314	0.108845	0.072854	0.94734
OR52B2	0.50587	0.999995	2.17148e-06	0.6818	0.96155
OR52B4	0.33658	0.999995	2.17148e-06	0.69464	0.80635
OR52B6	0.95679	0.861354	0.0648183	0.19305	0.77865
OR52H1	0.057795	0.999995	2.17148e-06	0.46645	0.59234
OR52I1	0.44299	0.999995	2.17148e-06	0.44683	0.74516
OR52K1	1.3473	0.352017	0.453436	0.010302	0.99732
OR52L1	0.11443	0.999995	2.17148e-06	0.82394	0.69601
OR52M1	0.31537	0.999995	2.17148e-06	0.43271	0.74303
OR52N5	0.68477	0.999995	2.17148e-06	0.42249	0.87297
OR52R1	0.40442	0.999995	2.17148e-06	0.33085	0.87055
OR56A1	1.0862	0.789763	0.102503	0.094248	0.81315
OR56A3	0.53937	0.960493	0.0175058	0.27356	0.83929
OR56B1	1.1783	0.792164	0.101185	0.11467	0.61044
OR5A2	1.4588	0.637053	0.195824	0.039038	0.97738
OR5AK2	0.89933	0.79318	0.100628	0.1309	0.98287
OR5AN1	0.63165	0.963921	0.0159586	0.29319	0.62037
OR5AP2	-0.48961	0.999995	2.17148e-06	0.62461	0.44416
OR5AR1	0.28183	0.999995	2.17148e-06	0.36873	0.71431
OR5B3	-0.66044	0.999995	2.17148e-06	0.58161	0.41658
OR5F1	0.73249	0.857795	0.0666165	0.18688	0.93562
OR5L1	0.68047	0.905972	0.0428852	0.22102	0.81655
OR5L2	0.3015	0.999995	2.17148e-06	0.53699	0.91672
OR5M10
OR5M9	1.0906	0.79318	0.100628	0.13118	0.82369
OR5R1	0.60734	0.999995	2.17148e-06	0.38832	0.95099
OR5T1	0.81914	0.960493	0.0175058	0.26298	0.98511
OR6B1	0.40805	0.999995	2.17148e-06	0.63238	0.82794
OR6B2	0.98836	0.630573	0.200265	0.03634	0.98601
OR6C4	0.47423	0.999995	2.17148e-06	0.7833	0.96988
OR6C6	1.3089	0.205729	0.686704	0.0033351	0.99932
OR6C68	0.30916	0.999995	2.17148e-06	0.52427	0.94565
OR6C74	1.1692	0.789763	0.102503	0.094426	0.99049
OR6K2	0.50875	0.900525	0.0455042	0.21456	0.83047
OR6K3	0.10225	0.999995	2.17148e-06	0.67431	0.84324
OR6K6	-0.17993	0.999995	2.17148e-06	0.57082	0.5772
OR6N2	1.4292	0.753414	0.122966	0.064326	0.97204
OR6V1	0.73654	0.960493	0.0175058	0.27832	0.87898
OR6X1	-0.36436	0.999995	2.17148e-06	0.75526	0.39298
OR7A5	0.1119	0.999995	2.17148e-06	0.43334	0.89772
OR7D4	0.98527	0.905972	0.0428852	0.22142	0.95525
OR7G3	1.159	0.792164	0.101185	0.11518	0.91947
OR8B3
OR8B8	1.0763	0.789763	0.102503	0.09828	0.91019
OR8D2	0.32282	0.979706	0.00890423	0.3185	0.85101
OR8G1
OR8G2
OR8G5	0.19364	0.999995	2.17148e-06	0.37027	0.80819
OR8J3	0.64084	0.999995	2.17148e-06	0.42579	0.95213
OR8K3	0.7589	0.839884	0.0757807	0.17784	0.98945
OR8U1	0.35135	0.999995	2.17148e-06	0.80882	0.86436
OR9G1	0.14119	0.999995	2.17148e-06	0.45616	0.71321
OR9I1	0.49951	0.999995	2.17148e-06	0.77091	0.95668
ORC2	-1.9412	0.143015	0.844618	0.99845	0.0067345
OTUB1	-1.4718	0.646597	0.189366	0.82734	0.12973
OTUB2	0.12997	0.999995	2.17148e-06	0.72482	0.90042
OTUD7B	1.2794	0.778314	0.108845	0.074089	0.92323
PAGR1	-0.021812	0.999995	2.17148e-06	0.88425	0.83811
PAK1	0.081236	0.999995	2.17148e-06	0.61973	0.80936
PALB2	-2.1154	0.309736	0.509008	0.98746	0.032981
PAPD7	0.39126	0.999995	2.17148e-06	0.75446	0.77321
PARG
PARK2	0.33734	0.979706	0.00890423	0.30972	0.74548
PARK7	0.90988	0.792164	0.101185	0.12533	0.40571
PARP1	-0.51964	0.999995	2.17148e-06	0.28571	0.50325
PARP14	0.96927	0.870136	0.0604129	0.20067	0.86406
PARP15	0.41502	0.999995	2.17148e-06	0.60959	0.94224
PARP2	0.39303	0.999995	2.17148e-06	0.63276	0.8545
PARP3	-0.085297	0.999995	2.17148e-06	0.52627	0.65786
PARP4	-0.18057	0.999995	2.17148e-06	0.87171	0.73186
PARP9	0.071714	0.999995	2.17148e-06	0.491	0.85665
PARPBP	0.81144	0.839738	0.0758562	0.1723	0.70971
PAXIP1	-1.289	0.648222	0.188276	0.9278	0.13075
PBRM1	0.39863	0.960493	0.0175058	0.26589	0.8943
PCID2	-0.28802	0.999995	2.17148e-06	0.65477	0.42821
PCNA	-3.3216	0.330338	0.481041	0.98619	0.041953
PDS5A	-0.97636	0.999995	2.17148e-06	0.94528	0.33374
PDS5B	-0.71069	0.999995	2.17148e-06	0.82029	0.50155
PER1	0.43919	0.999995	2.17148e-06	0.60545	0.84518
PER2	0.77157	0.979706	0.00890423	0.31512	0.80196
PER3	-0.88652	0.813383	0.0897049	0.60249	0.20156
PGBD5	1.9271	0.249339	0.60321	0.0055882	0.9943
PHF11	0.83137	0.965625	0.0151915	0.29577	0.96684
PHF3	0.37436	0.999995	2.17148e-06	0.34126	0.8352
PHIP	0.96693	0.835451	0.078079	0.14494	0.87706
PIAS1	1.3732	0.778314	0.108845	0.076994	0.83781
PIAS2	0.016885	0.999995	2.17148e-06	0.38949	0.47293
PIAS3	0.99246	0.792164	0.101185	0.10594	0.98952
PIAS4	0.032396	0.999995	2.17148e-06	0.84677	0.88741
PIF1	0.70255	0.839738	0.0758562	0.16623	0.96411
PIN1	1.1276	0.792164	0.101185	0.12422	0.97855
PINK1	0.25877	0.839738	0.0758562	0.16416	0.54688
PINX1
PLK1	-8.4279	0.00463	2.33442	0.99593	4.9409e-06
PLRG1	-2.1981	0.514247	0.288828	0.46086	0.085068
PML	0.65292	0.999995	2.17148e-06	0.41822	0.96291
PMP22	0.53575	0.905972	0.0428852	0.21781	0.249
PMS1	0.64885	0.792164	0.101185	0.12363	0.71717
PMS2	0.31205	0.999995	2.17148e-06	0.71699	0.82947
PNKP	-0.80799	0.943999	0.0250285	0.75231	0.26194
PNN	-2.7059	0.26817	0.57159	0.54376	0.02638
POLA1	-2.8107	0.151688	0.819049	0.99794	0.0082563
POLB	1.0905	0.839884	0.0757807	0.17857	0.88622
POLD1	0.6637	0.839884	0.0757807	0.17752	0.65174
POLD2	-4.6111	0.030556	1.5149	0.99996	0.00016305
POLD3	-4.3315	0.137217	0.862592	0.99469	0.0051731
POLD4	1.1759	0.792164	0.101185	0.1246	0.96561
POLE	-2.555	0.141016	0.850732	0.99877	0.0055684
POLE2	-5.3005	0.078125	1.10721	0.99978	0.0010326
POLE3	-0.71518	0.999995	2.17148e-06	0.95187	0.3981
POLE4	-0.69959	0.999995	2.17148e-06	0.949	0.51441
POLG	0.29146	0.905972	0.0428852	0.22021	0.55722
POLG2	0.2086	0.999995	2.17148e-06	0.5695	0.62739
POLH	0.85345	0.960493	0.0175058	0.2895	0.38379
POLI	0.93321	0.839738	0.0758562	0.16349	0.87964
POLK	1.4953	0.415621	0.381303	0.013751	0.96965
POLL	0.025748	0.999995	2.17148e-06	0.50871	0.42809
POLM	1.1304	0.789763	0.102503	0.095868	0.97102
POLN	0.51821	0.960493	0.0175058	0.28327	0.91504
POLQ	-0.3717	0.999995	2.17148e-06	0.8287	0.50842
POLR2A	1.4393	0.164174	0.784696	0.0022382	0.87323
POLR2B	-5.4703	0.077381	1.11137	0.99988	0.00053856
POLR2C	-0.54696	0.999995	2.17148e-06	0.96617	0.36755
POLR2D	-3.7484	0.078125	1.10721	0.99938	0.0019714
POLR2E	-0.064616	0.279896	0.553003	0.31711	0.028079
POLR2F	-2.1634	0.57918	0.237186	0.85853	0.10811
POLR2G	-3.3583	0.219359	0.658845	0.81714	0.017792
POLR2H	-5.6993	0.096536	1.01531	0.92571	0.0027323
POLR2I	-2.0222	0.195183	0.709558	0.99629	0.014166
POLR2J	-0.58335	0.999995	2.17148e-06	0.81743	0.52421
POLR2K
POLR2L	-4.8345	0.078125	1.10721	0.99977	0.0011216
POT1	-4.5617	0.078125	1.10721	0.99979	0.00098324
PPM1D	-2.2871	0.444091	0.352528	0.59621	0.068249
PPM1G	-2.5171	0.434892	0.361619	0.92586	0.065907
PPP4C	-3.2525	0.243394	0.61369	0.98922	0.020945
PPP4R1	-0.12865	0.999995	2.17148e-06	0.64813	0.74523
PPP4R2	-0.0070975	0.999995	2.17148e-06	0.50127	0.49861
PPP4R4	-0.32826	0.999995	2.17148e-06	0.49942	0.80381
PPP5C	0.13345	0.999995	2.17148e-06	0.4343	0.70461
PPP6C	-1.5533	0.309736	0.509008	0.991	0.032882
PPP6R1	0.2519	0.352017	0.453436	0.010065	0.64739
PPP6R2	-0.4268	0.999995	2.17148e-06	0.67994	0.57414
PPP6R3	1.3855	0.778314	0.108845	0.075976	0.9873
PRDM10	-1.6578	0.695522	0.157689	0.92958	0.14958
PRDM9	1.071	0.839738	0.0758562	0.15759	0.91865
PRIMPOL	0.84019	0.999995	2.17148e-06	0.34891	0.94154
PRKCG	0.75696	0.957987	0.0186404	0.2552	0.90567
PRKDC
PRMT1	-1.5355	0.571307	0.24313	0.94913	0.1015
PRMT6	0.22602	0.999995	2.17148e-06	0.50783	0.90149
PRMT8	0.35466	0.999995	2.17148e-06	0.57933	0.91118
PRPF19	-3.0424	0.40431	0.393286	0.96744	0.058683
PSIP1	0.72921	0.915529	0.0383279	0.22668	0.97152
PSMD14	-2.6226	0.307799	0.511733	0.98816	0.031577
PSME3	-2.2945	0.551551	0.258414	0.80682	0.095947
PTEN	2.7463	0.005787	2.23755	2.4705e-05	1
PTPN2	-0.40379	0.999995	2.17148e-06	0.75417	0.81567
PXMP2	-0.20054	0.999995	2.17148e-06	0.44447	0.52176
RAD1	-0.93565	0.942675	0.025638	0.2492	0.26057
RAD17	-0.29058	0.999995	2.17148e-06	0.71051	0.34673
RAD18	1.002	0.839738	0.0758562	0.1669	0.7113
RAD21	-4.3415	0.078125	1.10721	0.93551	0.0018232
RAD23A	0.83847	0.880755	0.0551449	0.20491	0.79988
RAD23B	-1.3049	0.822922	0.0846413	0.87706	0.20815
RAD50	-0.12354	0.971863	0.012395	0.61188	0.28108
RAD51	-3.5229	0.148611	0.827949	0.73644	0.0079302
RAD51AP1	1.3734	0.789763	0.102503	0.086985	0.8148
RAD51B	-1.2391	0.318461	0.496944	0.98933	0.03804
RAD51C	-2.9094	0.40431	0.393286	0.90301	0.058644
RAD51D	-3.0131	0.083889	1.07629	0.99075	0.0022382
RAD52	0.58718	0.863729	0.0636225	0.19515	0.97907
RAD54B	0.19098	0.999995	2.17148e-06	0.35021	0.64138
RAD54L	1.1118	0.778314	0.108845	0.07819	0.96203
RAD54L2	1.0561	0.839884	0.0757807	0.17901	0.91547
RAD9A	-1.6445	0.794706	0.0997935	0.94274	0.19454
RAD9B	0.6404	0.839738	0.0758562	0.16243	0.73032
RAG1	-0.0084445	0.999995	2.17148e-06	0.83577	0.8656
RAG2	0.96953	0.839738	0.0758562	0.16876	0.92559
RAP1A	0.34985	0.999995	2.17148e-06	0.35446	0.79176
RASSF7	-0.36041	0.999995	2.17148e-06	0.81089	0.54948
RBBP7	0.074484	0.999995	2.17148e-06	0.58591	0.74606
RBBP8	-1.1998	0.778546	0.108716	0.97074	0.18315
RBM7	-0.32792	0.999995	2.17148e-06	0.66917	0.77749
RBX1	-0.78059	0.63369	0.198123	0.93282	0.12106
RECQL	0.31762	0.950124	0.0222197	0.24726	0.94502
RECQL4
RECQL5	-1.1767	0.778546	0.108716	0.90338	0.18433
REV1	0.91668	0.839738	0.0758562	0.14924	0.48367
REV3L	-1.7801	0.255937	0.591867	0.99366	0.023217
RFC1	-0.27199	0.999995	2.17148e-06	0.43195	0.48913
RFC2	-1.6718	0.782965	0.106258	0.73264	0.18718
RFC3	-3.6208	0.123507	0.908308	0.99916	0.0040861
RFC4	-0.79525	0.905641	0.0430439	0.91926	0.24067
RFC5	-2.8211	0.307799	0.511733	0.99147	0.031271
RFWD3	-0.64511	0.999995	2.17148e-06	0.61868	0.52366
RHNO1	1.4029	0.753414	0.122966	0.062221	0.70731
RHO	-0.20889	0.999995	2.17148e-06	0.67611	0.86897
RIF1	-0.61237	0.999995	2.17148e-06	0.17842	0.4325
RING1	0.82838	0.999995	2.17148e-06	0.35762	0.69886
RINN1
RMI1	-1.4004	0.264092	0.578245	0.99299	0.025549
RMI2	0.51997	0.999995	2.17148e-06	0.33825	0.89237
RNASEH2A	-1.9036	0.195183	0.709558	0.9964	0.013583
RNF10	1.3752	0.753414	0.122966	0.064148	0.88991
RNF111	0.56022	0.999995	2.17148e-06	0.75047	0.97663
RNF113A	-1.2732	0.704346	0.152214	0.88991	0.15711
RNF113B	0.62066	0.999995	2.17148e-06	0.44723	0.94665
RNF126	-0.39968	0.999995	2.17148e-06	0.60509	0.44604
RNF138	0.42353	0.999995	2.17148e-06	0.75309	0.90078
RNF146	1.3053	0.472994	0.325144	0.020945	0.99437
RNF165	0.90373	0.857795	0.0666165	0.18931	0.72754
RNF168	0.4279	0.999995	2.17148e-06	0.75163	0.77642
RNF169	0.6955	0.999995	2.17148e-06	0.48318	0.98094
RNF17	-0.51975	0.999995	2.17148e-06	0.7779	0.55862
RNF2	-0.67573	0.999995	2.17148e-06	0.86105	0.48758
RNF20	-1.2854	0.307799	0.511733	0.99128	0.031864
RNF4	0.28848	0.999995	2.17148e-06	0.55673	0.34307
RNF40	-0.73942	0.999995	2.17148e-06	0.9644	0.48365
RNF7	0.24775	0.839884	0.0757807	0.1744	0.41161
RNF8	-1.6237	0.571307	0.24313	0.80849	0.10304
RPA1	-4.3335	0.193359	0.713636	0.27109	0.013207
RPA2	-1.4482	0.646588	0.189372	0.92975	0.12904
RPA3	-1.8326	0.467497	0.330221	0.4825	0.072844
RPA4	0.81967	0.960493	0.0175058	0.28571	0.9344
RPAIN	-1.9614	0.535122	0.271547	0.66599	0.092518
RPS27L	-1.3339	0.326781	0.485743	0.98421	0.041153
RRM1	-1.2841	0.64648	0.189445	0.80502	0.12833
RRM2	-0.97762	0.637203	0.195722	0.65099	0.12315
RRM2B	0.49586	0.960493	0.0175058	0.28183	0.41651
RTEL1	-2.4515	0.141144	0.850338	0.99865	0.0058352
RTF1	-0.18822	0.999995	2.17148e-06	0.95304	0.86284
RTFDC1	-0.13494	0.999995	2.17148e-06	0.19032	0.38991
RUVBL1	-4.0901	0.126591	0.897597	0.99912	0.0043233
RUVBL2	-4.4791	0.143015	0.844618	0.90971	0.007021
SAE1	-2.6748	0.199074	0.700985	0.99589	0.01546
SALL4	0.66035	0.835451	0.078079	0.14424	0.90111
SAMHD1	0.8871	0.839738	0.0758562	0.16598	0.97126
SCAF11	0.12388	0.999995	2.17148e-06	0.77452	0.47538
SCAF4	2.3281	0.164174	0.784696	0.0022778	0.99284
SCAF8	0.79139	0.839738	0.0758562	0.15676	0.97144
SCAI	0.84888	0.960493	0.0175058	0.28899	0.9741
SENP2	0.5527	0.999995	2.17148e-06	0.44093	0.81178
SENP6	-0.73069	0.999995	2.17148e-06	0.86079	0.47927
SENP7	-0.17623	0.999995	2.17148e-06	0.5378	0.45699
SENP8	2.1157	0.462369	0.335011	0.019245	0.99247
SERBP1	-1.2456	0.730168	0.136577	0.93513	0.16754
SET	-0.91033	0.999995	2.17148e-06	0.60196	0.36105
SETD2	-0.21736	0.999995	2.17148e-06	0.58684	0.54889
SETD8	-0.74629	0.921623	0.0354467	0.84357	0.25082
SETDB1	0.61057	0.999995	2.17148e-06	0.38044	0.75403
SETMAR	0.56094	0.999995	2.17148e-06	0.73813	0.47111
SETX	0.92904	0.792164	0.101185	0.11628	0.93165
SF3B1	-2.1813	0.57918	0.237186	0.96584	0.10639
SFPQ	-2.35	0.318461	0.496944	0.41128	0.038406
SFR1	-1.405	0.715574	0.145345	0.81679	0.16114
SHFM1	-2.13	0.394215	0.404267	0.25963	0.055719
SHPRH	0.5357	0.999995	2.17148e-06	0.75976	0.92048
SIN3A	-0.89382	0.964888	0.0155231	0.64401	0.27495
SIRT1	0.62133	0.999995	2.17148e-06	0.37072	0.91061
SIRT2	0.42648	0.999995	2.17148e-06	0.6641	0.77144
SIRT3	0.31751	0.999995	2.17148e-06	0.49348	0.63102
SIRT4	0.24638	0.999995	2.17148e-06	0.59109	0.86914
SIRT5	-0.56433	0.999995	2.17148e-06	0.79801	0.42375
SIRT6	-0.50319	0.999995	2.17148e-06	0.23823	0.55261
SIRT7	0.89482	0.948558	0.0229361	0.24498	0.91573
SKIV2L2	-4.1418	0.097388	1.01149	0.99938	0.0029102
SKP1	-1.1166	0.533587	0.272795	0.75951	0.089406
SLBP	-2.6	0.243394	0.61369	0.74722	0.0213
SLFN11	0.80484	0.960493	0.0175058	0.2878	0.94813
SLX1A
SLX4	-3.1944	0.193342	0.713674	0.79164	0.013
SLX4IP	-0.45264	0.999995	2.17148e-06	0.43521	0.5521
SMARCA2	1.011	0.919905	0.036257	0.22875	0.45782
SMARCA4	1.1143	0.792164	0.101185	0.12111	0.82441
SMARCA5	-2.4768	0.37726	0.423359	0.98466	0.051133
SMARCAD1	1.4082	0.659526	0.180768	0.041528	0.81266
SMARCAL1	-0.18409	0.999995	2.17148e-06	0.64619	0.62489
SMARCB1	-0.43844	0.999995	2.17148e-06	0.89562	0.57939
SMARCC2	0.76974	0.999995	2.17148e-06	0.40548	0.97791
SMARCD1	0.74821	0.999995	2.17148e-06	0.34188	0.97595
SMARCE1	1.344	0.792164	0.101185	0.11538	0.92825
SMC1A	-1.5108	0.637203	0.195722	0.95469	0.12407
SMC1B	1.6052	0.637053	0.195824	0.038001	0.97484
SMC2	-1.9483	0.214652	0.668265	0.99547	0.016952
SMC3	-1.1673	0.394215	0.404267	0.98338	0.054809
SMC4	-4.234	0.143015	0.844618	0.9983	0.0068629
SMC5	-0.28937	0.999995	2.17148e-06	0.61612	0.53411
SMC6	-1.516	0.311031	0.507196	0.99041	0.034522
SMEK2	0.61053	0.999995	2.17148e-06	0.43914	0.73434
SMG1	-0.41745	0.966815	0.0146566	0.90813	0.27653
SMG6	-0.33908	0.999995	2.17148e-06	0.86299	0.49992
SMUG1	0.83699	0.839738	0.0758562	0.15901	0.90674
SOD1	-1.5526	0.794706	0.0997935	0.93608	0.1939
SP100	1.0503	0.792164	0.101185	0.1212	0.64398
SP140	1.3054	0.789763	0.102503	0.086046	0.94539
SPIDR	-0.50383	0.999995	2.17148e-06	0.7159	0.51528
SPO11	1.4195	0.436562	0.359954	0.017239	0.99536
SPRTN	-0.52835	0.999995	2.17148e-06	0.67716	0.41931
SPTBN1	2.2888	0.097222	1.01224	0.00090419	0.9998
SSBP1	-0.14728	0.999995	2.17148e-06	0.85171	0.88969
SSBP2	0.022157	0.999995	2.17148e-06	0.89583	0.85645
SSBP3	0.19066	0.999995	2.17148e-06	0.44166	0.53278
SSRP1	-2.76	0.128648	0.890597	0.99904	0.0045308
STAG1	0.55761	0.792164	0.101185	0.12597	0.97258
STAG2	0.28657	0.999995	2.17148e-06	0.76207	0.82021
STRA13	-0.019805	0.999995	2.17148e-06	0.89159	0.84386
SUMO1	0.25532	0.999995	2.17148e-06	0.44029	0.56054
SUMO2	-0.42238	0.999995	2.17148e-06	0.6046	0.39743
SUMO3	0.83281	0.789763	0.102503	0.10449	0.86331
SUMO4	0.81818	0.960493	0.0175058	0.2893	0.94868
SUPT16H	-1.7619	0.535122	0.271547	0.8601	0.092024
SUPT4H1	-2.4562	0.484149	0.315021	0.64185	0.078022
SUPT5H	-1.8468	0.695522	0.157689	0.60382	0.14876
SUPT6H	-3.9438	0.078125	1.10721	0.9997	0.0013884
SUV39H1	0.69145	0.999995	2.17148e-06	0.36311	0.74794
SUV39H2	-0.23566	0.999995	2.17148e-06	0.68478	0.60115
SUV420H1	-1.3921	0.829672	0.0810936	0.58328	0.21162
SUV420H2	1.3351	0.778314	0.108845	0.077528	0.92726
SWI5
Scrambled
TADA2B	4.033e-05	0.999995	2.17148e-06	0.6718	0.8174
TADA3	0.63105	0.792164	0.101185	0.11315	0.63163
TAF1	-0.60001	0.999995	2.17148e-06	0.85075	0.41284
TAF1L	-0.33819	0.999995	2.17148e-06	0.50848	0.32932
TAF6L	-0.586	0.999995	2.17148e-06	0.80642	0.36446
TAF9	0.78065	0.960493	0.0175058	0.28805	0.79068
TAOK2	1.1953	0.675028	0.170678	0.04807	0.98122
TAOK3	0.78805	0.999995	2.17148e-06	0.33295	0.92403
TCEA1	0.45918	0.999995	2.17148e-06	0.57891	0.89104
TCEB1
TCEB2	-3.3931	0.077381	1.11137	0.99987	0.00057809
TCEB3	-0.64	0.999995	2.17148e-06	0.27672	0.47321
TCOF1	-3.1944	0.143015	0.844618	0.99838	0.006853
TDG	-1.1409	0.786564	0.104266	0.97534	0.18888
TDP1	-0.25129	0.999995	2.17148e-06	0.6278	0.86602
TDP2	0.25366	0.999995	2.17148e-06	0.6688	0.57199
TELO2	-1.4095	0.659284	0.180927	0.88304	0.13369
TEN1	-0.84922	0.918544	0.0369	0.96697	0.24783
TEP1	0.29814	0.863729	0.0636225	0.19654	0.52902
TERF1	0.37322	0.999995	2.17148e-06	0.47731	0.7333
TERF2
TERF2IP	0.91655	0.960493	0.0175058	0.26826	0.97874
TERT	-0.43013	0.999995	2.17148e-06	0.93886	0.65541
TET2	1.2905	0.436562	0.359954	0.016191	0.9957
TFPT	1.3244	0.672359	0.172399	0.043771	0.89986
THOC1	-1.1953	0.721244	0.141918	0.66274	0.16395
THOC2	-6.3961	0.078125	1.10721	0.8319	0.0012599
THRAP3	1.9893	0.042438	1.37225	0.00027175	0.99993
TICRR	-2.8934	0.24763	0.606197	0.94643	0.02216
TIMELESS	-2.6559	0.40431	0.393286	0.98265	0.058318
TINF2	-1.066	0.322847	0.491003	0.98851	0.040313
TIPIN	-1.8189	0.477908	0.320656	0.7671	0.075996
TNKS	0.11124	0.999995	2.17148e-06	0.82814	0.84937
TNP1	1.0158	0.789763	0.102503	0.093902	0.9844
TONSL	-3.2662	0.165757	0.780528	0.99749	0.0099065
TOP1	-0.37904	0.999995	2.17148e-06	0.95875	0.6608
TOP2A	-3.7807	0.195183	0.709558	0.99199	0.014284
TOP2B	-0.11846	0.999995	2.17148e-06	0.34807	0.57951
TOP3A	-3.3807	0.193342	0.713674	0.55561	0.012911
TOP3B	-0.65441	0.999995	2.17148e-06	0.85772	0.51955
TOPBP1	-1.8268	0.63369	0.198123	0.97602	0.12105
TOPORS	1.2804	0.79318	0.100628	0.13157	0.88093
TP53	2.5827	0.042438	1.37225	0.00027175	0.75478
TP53BP1	1.637	0.522163	0.282194	0.026192	0.94326
TP63	0.43411	0.999995	2.17148e-06	0.76126	0.92926
TP73	-0.30736	0.999995	2.17148e-06	0.4269	0.36748
TPP1	0.15745	0.999995	2.17148e-06	0.61581	0.8035
TRAIP	-2.2232	0.521872	0.282436	0.9739	0.086886
TRAPPC13	0.81922	0.765785	0.115893	0.06731	0.843
TREX1	0.064571	0.999995	2.17148e-06	0.64769	0.88049
TREX2	0.30941	0.960493	0.0175058	0.26781	0.84182
TRIM28	0.2516	0.857795	0.0666165	0.18832	0.81416
TRIM29	0.40869	0.979706	0.00890423	0.31521	0.65506
TRIM34
TRIM65	-0.42926	0.999995	2.17148e-06	0.8354	0.53692
TRIP12	0.84419	0.839738	0.0758562	0.15303	0.85925
TRIP13	-1.2613	0.318461	0.496944	0.98929	0.038178
TRRAP	-0.94614	0.999995	2.17148e-06	0.63796	0.36049
TTI1	-0.48603	0.999995	2.17148e-06	0.9575	0.30244
TTI2	-0.68561	0.999995	2.17148e-06	0.53704	0.34228
TYMS	-0.51876	0.999995	2.17148e-06	0.6275	0.83577
UBA1	-1.6888	0.678205	0.168639	0.97831	0.13911
UBA2	-3.0272	0.078125	1.10721	0.99968	0.001507
UBA3	0.55623	0.969195	0.0135888	0.29893	0.90242
UBB
UBC	0.30446	0.999995	2.17148e-06	0.45681	0.67862
UBE2A	0.45431	0.999995	2.17148e-06	0.73455	0.83841
UBE2B	0.74527	0.999995	2.17148e-06	0.45195	0.68324
UBE2C	-2.667	0.309736	0.509008	0.91947	0.03384
UBE2D1	1.2562	0.792164	0.101185	0.11371	0.67349
UBE2D2	-0.72858	0.945126	0.0245103	0.95897	0.26673
UBE2D3	-1.1807	0.945126	0.0245103	0.56617	0.2673
UBE2D4	0.081335	0.999995	2.17148e-06	0.49866	0.83748
UBE2F	1.6596	0.436562	0.359954	0.016537	0.93938
UBE2I	-2.7872	0.169727	0.770249	0.99592	0.010519
UBE2K	0.63433	0.948558	0.0229361	0.24388	0.96617
UBE2M	0.17987	0.472994	0.325144	0.021201	0.76572
UBE2N	0.43337	0.999995	2.17148e-06	0.37636	0.68315
UBE2NL
UBE2R2	2.0445	0.326582	0.486008	0.008365	0.68512
UBE2S	-1.6527	0.242937	0.614506	0.99458	0.020223
UBE2T	-2.566	0.31129	0.506835	0.95281	0.035609
UBE2U	1.0167	0.491667	0.308329	0.023613	0.99352
UBE2V1
UBE2V2	0.14918	0.999995	2.17148e-06	0.45903	0.84958
UBE2W	-0.01053	0.999995	2.17148e-06	0.62164	0.76024
UBR5	-0.5065	0.999995	2.17148e-06	0.84703	0.35393
UCHL3	1.025	0.789763	0.102503	0.10261	0.96053
UCHL5	-1.1952	0.8395	0.0759793	0.95974	0.21592
UHRF1
UHRF2	0.22531	0.999995	2.17148e-06	0.8604	0.88425
UIMC1	-1.1452	0.695522	0.157689	0.28458	0.14994
UNG	-0.14065	0.999995	2.17148e-06	0.50332	0.48219
UPF1	-0.33204	0.778546	0.108716	0.91233	0.18463
USP1	-0.94029	0.945126	0.0245103	0.49711	0.26641
USP10	-3.4773	0.144965	0.838737	0.99826	0.0074262
USP11	0.68132	0.999995	2.17148e-06	0.70852	0.84603
USP13	0.20688	0.999995	2.17148e-06	0.60704	0.75566
USP14	1.3298	0.743272	0.128852	0.059187	0.93311
USP15	1.0468	0.839738	0.0758562	0.17255	0.28931
USP20	0.56902	0.999995	2.17148e-06	0.43865	0.8756
USP22	0.10383	0.999995	2.17148e-06	0.81815	0.87538
USP26	0.14701	0.999995	2.17148e-06	0.38767	0.65148
USP28	1.6243	0.249269	0.603332	0.0050545	0.99894
USP3	0.91666	0.92928	0.0318534	0.23325	0.93146
USP34	1.1498	0.839738	0.0758562	0.17297	0.91651
USP37	-2.6057	0.143015	0.844618	0.99835	0.0069123
USP4	1.1569	0.789763	0.102503	0.10183	0.88241
USP44	-0.44006	0.999995	2.17148e-06	0.91081	0.55816
USP45	1.0474	0.860469	0.0652648	0.19193	0.95367
USP47	0.91533	0.960493	0.0175058	0.27729	0.97602
USP48	0.13259	0.999995	2.17148e-06	0.87625	0.90516
USP5	-3.9594	0.23563	0.627769	0.84603	0.019363
USP51	0.16664	0.999995	2.17148e-06	0.83409	0.49843
USP7	-2.6613	0.318961	0.496262	0.98904	0.03891
UVRAG	0.91357	0.792164	0.101185	0.12492	0.37652
UVSSA	0.31125	0.999995	2.17148e-06	0.51027	0.62586
VCP	-1.7536	0.197685	0.704026	0.99606	0.014768
WAPAL	-5.0144	0.078125	1.10721	0.99949	0.0020011
WDR48	-0.85272	0.999995	2.17148e-06	0.51476	0.36319
WDR70	-0.6167	0.999995	2.17148e-06	0.97563	0.30466
WDR76	-0.21015	0.999995	2.17148e-06	0.57777	0.70101
WEE1	-3.3495	0.198944	0.701269	0.98479	0.015075
WHSC1	-0.95215	0.914167	0.0389745	0.86537	0.24391
WRAP53	0.21419	0.999995	2.17148e-06	0.52908	0.7056
WRN	0.2804	0.999995	2.17148e-06	0.77166	0.72918
WRNIP1	0.54315	0.999995	2.17148e-06	0.35009	0.89513
XAB2	-2.3686	0.637203	0.195722	0.29687	0.12463
XPA	0.080831	0.999995	2.17148e-06	0.92171	0.91811
XPC	-0.94388	0.999995	2.17148e-06	0.86335	0.33035
XRCC1	-0.98901	0.999995	2.17148e-06	0.78392	0.29956
XRCC2	-0.47414	0.999995	2.17148e-06	0.72512	0.36824
XRCC3	-2.5193	0.535122	0.271547	0.91044	0.091817
XRCC4	-1.5734	0.833623	0.0790303	0.97244	0.21352
XRCC5	-4.1276	0.078125	1.10721	0.99962	0.001754
XRCC6	-1.7771	0.705798	0.15132	0.96433	0.15818
XRCC6BP1	1.181	0.835451	0.078079	0.14623	0.98816
YBX1	-1.3339	0.683586	0.165207	0.76974	0.14153
YTHDF2	-0.16997	0.999995	2.17148e-06	0.79485	0.59179
ZBTB2	-0.29989	0.512296	0.290479	0.76237	0.083862
ZBTB32	0.58692	0.999995	2.17148e-06	0.36523	0.85122
ZDHHC16	0.54088	0.999995	2.17148e-06	0.6964	0.71157
ZMPSTE24	1.189	0.792164	0.101185	0.11096	0.77721
ZMYM3	0.75755	0.957987	0.0186404	0.25785	0.96185
ZMYND8	1.6014	0.436562	0.359954	0.017239	0.81079
ZNF451	0.38398	0.999995	2.17148e-06	0.44022	0.64194
ZNF827	-0.012274	0.999995	2.17148e-06	0.65637	0.89139
ZRANB3	0.081076	0.999995	2.17148e-06	0.39109	0.90128
ZSWIM7	-0.037335	0.999995	2.17148e-06	0.48751	0.39166

## Sheet: Hart (2015), WT
Gene	lfc	fdr	fdr_log10	pos_p	neg_p
ABL1	0.91118	0.670143	0.173833	0.08445	0.79972
ACD	-0.46489	0.999995	2.17148e-06	0.21403	0.35733
ACTL6A	-2.2966	0.072924	1.13713	0.99937	0.0034197
ACTR5	-1.9247	0.511853	0.290855	0.88435	0.1005
ACTR8	-0.16624	0.804591	0.0944248	0.18003	0.20283
ADH5	0.98687	0.898707	0.0463819	0.22775	0.86061
AICDA	0.4716	0.999995	2.17148e-06	0.48019	0.93285
AKAP8	0.68045	0.943056	0.0254625	0.25518	0.90423
ALDH2	-0.22069	0.999995	2.17148e-06	0.12654	0.52996
ALKBH1	-0.33555	0.999995	2.17148e-06	0.45862	0.54469
ALKBH2	-0.96858	0.999995	2.17148e-06	0.51799	0.33222
ALKBH3	0.67885	0.540917	0.266869	0.042606	0.92153
AMN1	0.58142	0.854689	0.0681919	0.19226	0.5701
ANKRD28	0.35592	0.999995	2.17148e-06	0.56551	0.77486
ANKRD32	1.2682	0.435143	0.361368	0.031791	0.86876
ANKRD44	-0.48589	0.999995	2.17148e-06	0.91872	0.59491
ANKRD52	-1.2027	0.509914	0.292503	0.84008	0.098956
ANP32E	0.50981	0.999995	2.17148e-06	0.45007	0.64829
APAF1	0.47713	0.999995	2.17148e-06	0.4164	0.85289
APBB1	0.27178	0.999995	2.17148e-06	0.39583	0.69709
APC	0.2813	0.999995	2.17148e-06	0.41635	0.81611
APEX1	0.12952	0.999995	2.17148e-06	0.54048	0.79783
APEX2	-1.8009	0.209158	0.679526	0.96599	0.023672
APITD1
APLF	0.55449	0.999995	2.17148e-06	0.39173	0.97337
APOBEC1	0.69318	0.765448	0.116084	0.14033	0.95993
APOBEC2	1.1861	0.761009	0.11861	0.13639	0.85555
APOBEC3A	0.53198	0.40467	0.392899	0.027717	0.91135
APOBEC3B	0.6675	0.943056	0.0254625	0.27812	0.72385
APOBEC3C
APOBEC3D	0.70819	0.943056	0.0254625	0.27733	0.9739
APOBEC3F
APOBEC3G	0.84034	0.813968	0.0893927	0.16451	0.9476
APOBEC3H	1.284	0.258769	0.587088	0.0085174	0.99451
APTX	-0.19099	0.999995	2.17148e-06	0.20623	0.54889
ARID1A	1.0075	0.684555	0.164592	0.10187	0.63697
ARID1B	0.87296	0.684555	0.164592	0.10237	0.9708
ARID2	0.29151	0.999995	2.17148e-06	0.40675	0.79883
ASCC1	0.63932	0.999995	2.17148e-06	0.36931	0.86312
ASF1A	0.21428	0.999995	2.17148e-06	0.75979	0.77526
ASF1B	0.94186	0.760417	0.118948	0.13336	0.97069
ASH1L	0.57669	0.999995	2.17148e-06	0.36981	0.92489
ASH2L	0.61446	0.899936	0.0457884	0.2329	0.78291
ATAD5	0.078895	0.999995	2.17148e-06	0.61774	0.82955
ATF2	0.88342	0.8018	0.0959339	0.15652	0.92479
ATM	0.79337	0.758763	0.119894	0.12733	0.98479
ATMIN	-4.1456	0.057425	1.2409	0.99933	0.0020322
ATR	-1.5357	0.511853	0.290855	0.79102	0.10004
ATRIP	-0.51521	0.914733	0.0387057	0.81357	0.2537
ATRX	-1.4783	0.311307	0.506811	0.34825	0.043
ATXN3	-0.097483	0.999995	2.17148e-06	0.77013	0.70157
ATXN7	1.0537	0.258769	0.587088	0.0071003	0.99848
AUNIP	0.92635	0.899936	0.0457884	0.23233	0.94173
BABAM1	0.68347	0.661719	0.179326	0.076312	0.9639
BAP1	-0.77282	0.699861	0.154988	0.96377	0.16247
BARD1	-1.041	0.915423	0.0383782	0.13001	0.25658
BAZ1A	0.52622	0.899936	0.0457884	0.23239	0.71822
BAZ1B	-0.54861	0.999995	2.17148e-06	0.90853	0.54737
BCAS2	-1.0526	0.878317	0.0563487	0.94263	0.23061
BCCIP	-0.023537	0.999995	2.17148e-06	0.71018	0.59456
BCLAF1
BEND3	0.36702	0.999995	2.17148e-06	0.46763	0.89793
BLM	-1.3204	0.52767	0.277638	0.9213	0.10481
BMI1	-0.075335	0.999995	2.17148e-06	0.73002	0.6839
BOD1L1	-1.2728	0.383469	0.41627	0.96856	0.061452
BPTF	-0.18576	0.999995	2.17148e-06	0.91762	0.53375
BRAP	-4.8979	0.072522	1.13953	0.99263	0.0032524
BRAT1	-1.7299	0.143731	0.84245	0.82128	0.01329
BRCA1	-1.4152	0.661062	0.179758	0.84529	0.14414
BRCA2	-1.4006	0.383469	0.41627	0.99545	0.06216
BRCC3	0.34506	0.999995	2.17148e-06	0.52441	0.74752
BRD1	1.1613	0.391803	0.406932	0.026389	0.98484
BRD2	-1.7429	0.26388	0.578594	0.87517	0.032834
BRD4	-1.3792	0.153752	0.813179	0.34378	0.015308
BRD7
BRD8	-1.1861	0.895291	0.0480358	0.88846	0.24026
BRDT	0.15031	0.999995	2.17148e-06	0.73259	0.83312
BRE	1.1989	0.661719	0.179326	0.078428	0.96925
BRIP1	-2.7768	0.160936	0.793347	0.97903	0.016351
BTG2	0.096747	0.999995	2.17148e-06	0.77113	0.8357
BUB1B	-2.1925	0.048538	1.31392	0.99977	0.0012744
C10orf12	0.50825	0.999995	2.17148e-06	0.46061	0.97089
C11orf30	-1.1248	0.285932	0.543737	0.94578	0.037863
C15orf41	-2.1603	0.072924	1.13713	0.99933	0.0036362
C17orf70	-0.013431	0.999995	2.17148e-06	0.7698	0.62125
C19orf40	-0.25917	0.999995	2.17148e-06	0.63081	0.71835
C1orf115	0.48064	0.990184	0.0042841	0.32455	0.99166
C1orf86	-0.0024515	0.999995	2.17148e-06	0.84024	0.8329
C20orf196	-0.22583	0.999995	2.17148e-06	0.41302	0.74455
C4orf27
C7orf49	1.2732	0.644281	0.190925	0.067051	0.98681
C9orf142	0.33744	0.999995	2.17148e-06	0.49209	0.84989
CAND1	3.1902	0.001078	2.96738	4.9205e-06	1
CASP3	-0.22935	0.999995	2.17148e-06	0.66145	0.83003
CBX1
CBX3
CBX4	0.90804	0.427135	0.369435	0.030719	0.97629
CBX5	1.2457	0.758763	0.119894	0.12722	0.92677
CCDC101	-0.93666	0.902365	0.0446178	0.95567	0.24516
CCNA1	-0.18796	0.999995	2.17148e-06	0.30392	0.92268
CCNA2	-2.0657	0.065493	1.18381	0.99954	0.0026521
CCNB1	-1.1085	0.476199	0.322212	0.959	0.087521
CCNB2	2.022	0.661719	0.179326	0.07705	0.92401
CCNB3	1.003	0.674891	0.170766	0.094331	0.96084
CCNC	1.6261	0.671708	0.172819	0.086832	0.91389
CCND1	-2.347	0.292336	0.534118	0.83145	0.039379
CCND2	0.40662	0.999995	2.17148e-06	0.48667	0.96372
CCND3	0.36089	0.999995	2.17148e-06	0.40633	0.9305
CCNE1	0.44683	0.999995	2.17148e-06	0.45761	0.96952
CCNH	-2.0443	0.072924	1.13713	0.99916	0.0040791
CCNO	0.43112	0.913699	0.0391969	0.23886	0.93271
CDC25A	-0.11559	0.999995	2.17148e-06	0.82929	0.61378
CDC25B	-0.64171	0.999995	2.17148e-06	0.90123	0.31636
CDC34	0.45565	0.943056	0.0254625	0.27493	0.86833
CDC5L	-2.3441	0.140571	0.852104	0.99721	0.012838
CDC7	-0.20939	0.999995	2.17148e-06	0.72157	0.59956
CDCA5	-1.2382	0.715205	0.145569	0.9785	0.16884
CDK1
CDK12	-0.081607	0.999995	2.17148e-06	0.95345	0.48253
CDK2	-0.65424	0.999995	2.17148e-06	0.84834	0.33795
CDK4	-2.4999	0.123128	0.909643	0.99166	0.010436
CDK7	0.24282	0.999995	2.17148e-06	0.37792	0.54893
CDK8	1.1305	0.619095	0.208243	0.051463	0.90985
CDK9	-2.5141	0.215392	0.66677	0.71775	0.025326
CDKL5	0.35322	0.884222	0.0534387	0.21668	0.96631
CDKN1A	1.5354	0.135536	0.867945	0.0013925	0.99975
CDKN1B	1.8954	0.258769	0.587088	0.0083599	0.96456
CDKN2A	0.69924	0.897078	0.0471698	0.22502	0.98499
CDKN2D	0.27222	0.999995	2.17148e-06	0.36392	0.94373
CEP164	1.2063	0.674891	0.170766	0.095856	0.97599
CEP57	-0.58225	0.999995	2.17148e-06	0.77488	0.59222
CEP63	0.051776	0.999995	2.17148e-06	0.71897	0.81225
CETN2	0.14334	0.999995	2.17148e-06	0.46136	0.53816
CHAF1A	-0.77819	0.999995	2.17148e-06	0.95479	0.36962
CHAF1B	-1.6585	0.67448	0.171031	0.75942	0.14937
CHD1L	0.15654	0.83446	0.0785945	0.18099	0.50027
CHD3	0.41851	0.999995	2.17148e-06	0.3849	0.87179
CHD4
CHEK1	-2.9046	0.081974	1.08632	0.99896	0.0052403
CHEK2	1.3815	0.369281	0.432643	0.021803	0.99386
CHFR	0.64602	0.970266	0.0131092	0.30459	0.96685
CHRAC1	-1.1676	0.740579	0.130429	0.4195	0.17754
CHTF18	0.41123	0.990184	0.0042841	0.31903	0.67954
CIB1	0.46198	0.758763	0.119894	0.1282	0.68129
CLK2	0.48844	0.999995	2.17148e-06	0.48919	0.97198
CLSPN	-1.228	0.40273	0.394986	0.91483	0.068921
CNOT4	0.083701	0.644281	0.190925	0.059464	0.875
CNOT7	-1.1506	0.999995	2.17148e-06	0.65827	0.30467
COL1A1	-0.4978	0.999995	2.17148e-06	0.83847	0.48115
COL21A1	0.55109	0.943056	0.0254625	0.2828	0.93383
COPS2	-0.62718	0.999995	2.17148e-06	0.77531	0.3378
COPS3	-2.3034	0.115107	0.938898	0.9704	0.0080155
COPS4	-0.10867	0.999995	2.17148e-06	0.54351	0.51889
COPS5	-0.67015	0.301108	0.521278	0.81937	0.040904
COPS6	-4.1736	0.072924	1.13713	0.91418	0.0040299
COPS7A	1.0738	0.644281	0.190925	0.067288	0.99434
COPS7B	-0.11652	0.999995	2.17148e-06	0.58337	0.75487
COPS8	-0.48249	0.999995	2.17148e-06	0.68461	0.31686
CREBBP	-5.6495e-05	0.999995	2.17148e-06	0.2674	0.7287
CRY1	0.8243	0.660179	0.180338	0.074609	0.92036
CRY2	-0.41663	0.999995	2.17148e-06	0.63797	0.59354
CSNK1D	1.3536	0.619095	0.208243	0.051591	0.98954
CSNK1E	-0.46101	0.999995	2.17148e-06	0.71507	0.86447
CSNK2A1
CSNK2A2	-0.0046544	0.999995	2.17148e-06	0.87292	0.74062
CSNK2B	-2.2125	0.196579	0.706463	0.67601	0.021094
CTC1	-2.1983	0.118824	0.925096	0.99375	0.0090881
CTCF	-1.4654	0.117228	0.930969	0.98899	0.008724
CUL1	-0.84008	0.999995	2.17148e-06	0.92945	0.29727
CUL2	-1.2185	0.500697	0.300425	0.94592	0.095216
CUL3	-0.43477	0.999995	2.17148e-06	0.32929	0.47917
CUL4A	0.24804	0.882771	0.0541519	0.21007	0.78408
CUL4B	0.16218	0.999995	2.17148e-06	0.78041	0.78423
CUL5	1.6545	0.372179	0.429248	0.022619	0.99453
CUL7	0.0090962	0.999995	2.17148e-06	0.48756	0.77156
CUL9	0.13335	0.661719	0.179326	0.078762	0.68537
CXXC1	-0.26018	0.999995	2.17148e-06	0.85272	0.80003
CXorf57	1.8176	0.228718	0.6407	0.0039807	0.87579
DAXX	-2.4013	0.40273	0.394986	0.91923	0.067258
DBF4
DCAF11	0.57279	0.999995	2.17148e-06	0.40458	0.9233
DCLRE1A	0.78071	0.884222	0.0534387	0.21702	0.79616
DCLRE1B	-4.7622	0.03125	1.50515	0.99996	0.00028047
DCLRE1C	0.90775	0.834405	0.0786231	0.17974	0.88414
DCUN1D1
DCUN1D2	0.39639	0.786549	0.104274	0.15174	0.95039
DCUN1D3	1.0136	0.671708	0.172819	0.088948	0.8318
DCUN1D4	0.17645	0.999995	2.17148e-06	0.66546	0.97343
DCUN1D5	0.58655	0.31045	0.508008	0.014087	0.93274
DDB1	-3.8361	0.068383	1.16505	0.9984	0.0028883
DDB2
DDX1	-2.7175	0.117228	0.930969	0.97589	0.0086158
DDX11
DICER1	-1.3331	0.910556	0.0406933	0.97475	0.25003
DKC1	0.32454	0.999995	2.17148e-06	0.39849	0.16226
DLGAP5	-0.47013	0.999995	2.17148e-06	0.096978	0.73074
DMC1	-0.55421	0.999995	2.17148e-06	0.65253	0.49855
DNA2	-1.863	0.117228	0.930969	0.99806	0.0088323
DNAJC2	-2.0995	0.302119	0.519822	0.79877	0.041386
DNMT1	-1.8892	0.378592	0.421829	0.69092	0.059435
DNTT	1.16	0.679991	0.167497	0.099359	0.69315
DPY30
DROSHA	-1.3973	0.614502	0.211477	0.92119	0.13048
DSCC1	-2.292	0.215642	0.666267	0.99028	0.025601
DTX1	-0.097501	0.999995	2.17148e-06	0.78642	0.90941
DTX2	0.2473	0.9923	0.00335701	0.33416	0.68405
DTX3	0.48293	0.999995	2.17148e-06	0.37257	0.90769
DTX3L	1.5208	0.228718	0.6407	0.0037543	0.9993
DTX4	-0.079919	0.999995	2.17148e-06	0.65798	0.70124
DUT	-0.84233	0.77842	0.108786	0.96482	0.19016
DYNLL1	0.14607	0.999995	2.17148e-06	0.53294	0.58731
ECT2	-2.4183	0.209158	0.679526	0.77699	0.023731
EEPD1	0.33179	0.999995	2.17148e-06	0.42887	0.95159
EID3	0.77241	0.943056	0.0254625	0.25401	0.90913
EIF4A1	-3.7794	0.140571	0.852104	0.33178	0.01268
EME1	-0.86235	0.999995	2.17148e-06	0.97484	0.34062
EME2	0.11669	0.817906	0.0872966	0.17086	0.53156
ENDOV	0.77831	0.943056	0.0254625	0.28532	0.84011
ENY2
EP300	1.4307	0.228718	0.6407	0.0034197	0.99937
EP400
ERCC1	-1.0429	0.757334	0.120713	0.90304	0.18242
ERCC2	-2.5986	0.420217	0.376526	0.92625	0.074353
ERCC3	-1.7329	0.084921	1.07098	0.99887	0.0055257
ERCC4	-1.8759	0.074052	1.13046	0.98532	0.0042267
ERCC5	-0.86471	0.862995	0.0639917	0.42305	0.22462
ERCC6	0.88359	0.765448	0.116084	0.14068	0.91796
ERCC6L	-0.95915	0.270051	0.568554	0.38183	0.034527
ERCC6L2	-0.12298	0.999995	2.17148e-06	0.66079	0.96062
ERCC8	1.0175	0.671861	0.172721	0.089735	0.76938
ESCO2	-1.7369	0.622879	0.205596	0.85269	0.13297
ETAA1	1.0518	0.897078	0.0471698	0.22561	0.86226
EXD2	0.72252	0.882771	0.0541519	0.21425	0.93699
EXO1	-0.70877	0.999995	2.17148e-06	0.61053	0.31456
EXO5	-0.055964	0.999995	2.17148e-06	0.1846	0.80715
EYA1	1.2503	0.674891	0.170766	0.097844	0.84409
EYA2	0.94309	0.774154	0.111173	0.14407	0.92583
EYA3	0.98189	0.644281	0.190925	0.058962	0.98848
EYA4	0.32451	0.999995	2.17148e-06	0.51974	0.91594
EZH2	0.076807	0.999995	2.17148e-06	0.63654	0.96943
FAF1	-0.11225	0.999995	2.17148e-06	0.88995	0.77922
FAM122A	-0.1914	0.999995	2.17148e-06	0.92946	0.71683
FAM175A	-0.44708	0.999995	2.17148e-06	0.7969	0.66406
FAM175B	0.64324	0.31045	0.508008	0.014038	0.97512
FAM178A	0.44728	0.999995	2.17148e-06	0.52093	0.95281
FAM35A
FAN1	0.53658	0.943056	0.0254625	0.27692	0.95573
FANCA	-0.68721	0.999995	2.17148e-06	0.96009	0.42682
FANCB	0.30383	0.999995	2.17148e-06	0.76249	0.73568
FANCC	-0.91549	0.845112	0.0730857	0.78015	0.219
FANCD2	-0.55477	0.999995	2.17148e-06	0.94028	0.52447
FANCE	-1.2718	0.383469	0.41627	0.80934	0.061767
FANCF	-2.2446	0.482679	0.316342	0.57425	0.089263
FANCG	-0.34116	0.999995	2.17148e-06	0.65304	0.67547
FANCI	-2.3255	0.271094	0.56688	0.97009	0.03497
FANCL	-1.3723	0.889592	0.0508091	0.4885	0.23458
FANCM	-0.15428	0.999995	2.17148e-06	0.4243	0.73355
FBXO18	0.87854	0.775679	0.110318	0.1461	0.93876
FBXO22	0.67453	0.649773	0.187238	0.070466	0.92755
FBXW7	0.21557	0.999995	2.17148e-06	0.48736	0.92569
FEN1	-3.9755	0.150031	0.823819	0.99244	0.014215
FIGNL1	0.38773	0.999995	2.17148e-06	0.50532	0.91178
FOXM1	-0.25623	0.999995	2.17148e-06	0.90422	0.71478
FOXN3	0.32996	0.999995	2.17148e-06	0.83392	0.97309
FOXO3
FZR1	0.57564	0.999995	2.17148e-06	0.5024	0.6465
GABBR1	0.39777	0.999995	2.17148e-06	0.58873	0.96409
GADD45A	0.76817	0.813968	0.0893927	0.16865	0.96709
GADD45G	0.30681	0.999995	2.17148e-06	0.54348	0.85142
GAR1	-2.2837	0.610031	0.214648	0.06652	0.12685
GEN1	0.15945	0.999995	2.17148e-06	0.53566	0.74694
GLG1	-0.1067	0.999995	2.17148e-06	0.39414	0.69934
GPI	-0.35888	0.999995	2.17148e-06	0.82416	0.57095
GPS1	-3.9008	0.153752	0.813179	0.99303	0.015445
GTF2H1	0.50226	0.973161	0.0118153	0.30883	0.69251
GTF2H2
GTF2H3	-0.48602	0.999995	2.17148e-06	0.52073	0.34112
GTF2H4	-1.4361	0.286951	0.542192	0.94406	0.038326
GTF2H5	-2.8338	0.612838	0.212654	0.87195	0.12942
H2AFX	-0.7877	0.452936	0.343963	0.96563	0.082728
H2AFY	0.69782	0.869296	0.0608323	0.19892	0.86983
H2AFY2	0.48537	0.992323	0.00334694	0.33629	0.96746
H2AFZ
H3F3A
H3F3B	-1.5761	0.662648	0.178717	0.91581	0.14524
HDAC1	0.45815	0.999995	2.17148e-06	0.53448	0.92861
HDAC10	1.2546	0.520094	0.283918	0.039428	0.98264
HDAC2	-0.91277	0.939326	0.0271837	0.78392	0.267
HDAC3	-2.9465	0.007184	2.14363	0.99999	2.4602e-05
HDAC4	1.2333	0.258769	0.587088	0.0083304	0.89922
HDAC9	0.93473	0.672667	0.1722	0.091378	0.96106
HELB	0.74712	0.812818	0.0900067	0.16168	0.85103
HELLS	-0.57463	0.999995	2.17148e-06	0.25528	0.54834
HELQ	0.46723	0.999995	2.17148e-06	0.56501	0.96128
HERC2	0.47825	0.999995	2.17148e-06	0.41027	0.94563
HES1	0.2547	0.999995	2.17148e-06	0.61347	0.9285
HFM1	0.92511	0.369281	0.432643	0.021399	0.99203
HINFP	-2.2605	0.393768	0.40476	0.99672	0.064729
HIPK1	0.51851	0.947816	0.023276	0.2943	0.97215
HIPK2	0.56909	0.943056	0.0254625	0.26484	0.90644
HLTF	0.021476	0.760417	0.118948	0.13519	0.7586
HMGA1
HMGA2	-0.001824	0.999995	2.17148e-06	0.74505	0.94482
HMGB1
HMGB2	0.38544	0.999995	2.17148e-06	0.55694	0.80271
HMGN1	-1.0557	0.942943	0.0255146	0.72978	0.27233
HNRNPK	-8.9461	0.077669	1.10975	0.99524	0.0046105
HNRNPUL1	-0.21227	0.999995	2.17148e-06	0.73278	0.59871
HNRNPUL2	0.67156	0.943056	0.0254625	0.28238	0.87871
HPRT1	-1.6622	0.832395	0.0796705	0.78773	0.2138
HUS1	-1.0393	0.40764	0.389723	0.99412	0.070732
HUS1B	1.7966	0.119073	0.924187	0.0010382	0.97015
HUWE1	-2.6678	0.048002	1.31874	0.9998	0.0012055
ID3	0.10596	0.85431	0.0683845	0.19017	0.75711
IGHMBP2	1.1669	0.282074	0.549637	0.010387	0.88873
ING4	1.1069	0.254898	0.593634	0.0063917	0.99861
INO80	0.091512	0.999995	2.17148e-06	0.43612	0.66929
INO80B	-0.47193	0.999995	2.17148e-06	0.94352	0.73944
INO80C	-0.22143	0.999995	2.17148e-06	0.59387	0.81161
INO80D	0.36601	0.999995	2.17148e-06	0.59535	0.82947
INO80E	0.62082	0.674891	0.170766	0.097066	0.93395
IP6K3	-0.36173	0.999995	2.17148e-06	0.10162	0.69516
KAT2A	-0.60816	0.839354	0.0760548	0.74462	0.21655
KAT2B	0.96519	0.760417	0.118948	0.13542	0.98134
KAT5	0.93264	0.943056	0.0254625	0.27493	0.92307
KAT8	-4.1274	0.119253	0.923531	0.81374	0.0093932
KDM1A	0.49982	0.943056	0.0254625	0.2768	0.89772
KDM2A	-0.82598	0.699861	0.154988	0.97233	0.15832
KDM4A	-0.2179	0.999995	2.17148e-06	0.64005	0.56895
KDM4D	0.80823	0.425959	0.370632	0.030148	0.99206
KDM5A	0.16342	0.999995	2.17148e-06	0.70265	0.72358
KEAP1	3.7035	0.001078	2.96738	4.9205e-06	1
KIAA1586	0.10255	0.999995	2.17148e-06	0.40557	0.50226
KLHL15	1.2606	0.661719	0.179326	0.080071	0.96358
KMT2A
L3MBTL1	0.34437	0.813968	0.0893927	0.16775	0.26989
LATS1	1.5389	0.258769	0.587088	0.0082812	0.85685
LATS2	1.6256	0.037069	1.43099	0.00021158	0.99777
LIG1	-2.0607	0.420217	0.376526	0.83777	0.074147
LIG3	0.081842	0.999995	2.17148e-06	0.64411	0.68795
LIG4	-0.16043	0.999995	2.17148e-06	0.72063	0.63834
LMNA	-1.5396	0.072522	1.13953	0.99943	0.0033115
Luciferase
MAD2L2	-0.39734	0.509462	0.292888	0.70061	0.098159
MAPK14	-0.8976	0.999995	2.17148e-06	0.28373	0.31406
MAPK8	0.33423	0.999995	2.17148e-06	0.52343	0.93158
MAPKAPK2	0.036377	0.999995	2.17148e-06	0.93055	0.68509
MARK3	-0.13288	0.999995	2.17148e-06	0.91303	0.76889
MASTL	-0.83969	0.072924	1.13713	0.80748	0.0037248
MAU2	-0.67338	0.549167	0.260296	0.48166	0.11096
MB21D1	1.0463	0.644281	0.190925	0.057643	0.96106
MBD4	1.2558	0.258769	0.587088	0.0083402	0.99583
MBTD1	-0.011324	0.999995	2.17148e-06	0.62439	0.683
MCM10	-0.9842	0.915423	0.0383782	0.57664	0.25707
MCM2	-1.1459	0.73796	0.131967	0.53033	0.17522
MCM3	-2.6584	0.178017	0.749539	0.93186	0.018289
MCM3AP	-1.8398	0.037716	1.42347	0.99984	0.00085124
MCM4	-1.3322	0.701829	0.153769	0.64265	0.16424
MCM5	-4.481	0.072924	1.13713	0.66836	0.0039905
MCM6	-2.1543	0.633185	0.198469	0.52257	0.13589
MCM7	-4.6644	0.019397	1.71227	0.99997	0.00013285
MCM8	-0.38092	0.999995	2.17148e-06	0.89249	0.43958
MCM9	0.23204	0.943056	0.0254625	0.279	0.73962
MCPH1	-1.1252	0.914733	0.0387057	0.54255	0.25374
MCRS1	-0.67812	0.999995	2.17148e-06	0.37773	0.43114
MDC1	-0.49336	0.999995	2.17148e-06	0.10944	0.63596
MDM2	-3.4263	0.150031	0.823819	0.99312	0.014048
MDM4	-1.9208	0.67448	0.171031	0.68138	0.14922
MEN1	-1.6327	0.207741	0.682478	0.98086	0.023003
METTL3	-0.52036	0.999995	2.17148e-06	0.84494	0.56945
MGMT	0.048682	0.999995	2.17148e-06	0.72098	0.70055
MLH1	0.36238	0.999995	2.17148e-06	0.51068	0.65209
MLH3	0.17484	0.999995	2.17148e-06	0.70895	0.97979
MMS19	-1.591	0.699861	0.154988	0.55906	0.16298
MMS22L	-2.6357	0.107256	0.969578	0.99786	0.0073463
MNAT1	-0.45444	0.999995	2.17148e-06	0.78742	0.73787
MORF4L1	0.39415	0.999995	2.17148e-06	0.62018	0.94482
MORF4L2	0.019716	0.999995	2.17148e-06	0.70551	0.64029
MPG	0.79907	0.943056	0.0254625	0.26515	0.8119
MPLKIP	0.096631	0.999995	2.17148e-06	0.60827	0.82626
MPZ	1.2478	0.380293	0.419882	0.024745	0.98397
MRE11A	-1.6075	0.325028	0.488079	0.83637	0.045637
MSH2	0.4285	0.882771	0.0541519	0.21465	0.80072
MSH3	0.3114	0.999995	2.17148e-06	0.57696	0.96135
MSH4	0.26805	0.999995	2.17148e-06	0.72679	0.70379
MSH5	-0.059648	0.999995	2.17148e-06	0.48486	0.73146
MSH6	0.60481	0.661719	0.179326	0.079382	0.90966
MTA1	-1.0183	0.993114	0.0030009	0.36409	0.29022
MTA2	0.48815	0.999995	2.17148e-06	0.47808	0.62456
MTA3	0.2489	0.999995	2.17148e-06	0.41165	0.75382
MTOR	-2.2093	0.123128	0.909643	0.86516	0.010141
MUM1	-0.0051511	0.999995	2.17148e-06	0.59388	0.61481
MUS81	-0.45291	0.999995	2.17148e-06	0.72711	0.65809
MUTYH	-0.78683	0.999995	2.17148e-06	0.50404	0.37933
MVP	0.41253	0.999995	2.17148e-06	0.6902	0.95063
MYBBP1A	-2.3586	0.378592	0.421829	0.99308	0.059218
NABP1	0.114	0.999995	2.17148e-06	0.94695	0.68693
NABP2	0.84225	0.758763	0.119894	0.12396	0.9409
NAE1	0.058186	0.999995	2.17148e-06	0.6452	0.28072
NBN	0.78483	0.882771	0.0541519	0.21151	0.62133
NCAPD2	-0.68795	0.789332	0.10274	0.15939	0.19463
NCAPD3	-1.186	0.610031	0.214648	0.64889	0.12761
NCAPG	-1.0021	0.431721	0.364797	0.67431	0.07704
NCAPG2	-2.2564	0.342399	0.465468	0.60085	0.049249
NCAPH	-1.5615	0.586231	0.231931	0.91169	0.11912
NCAPH2	-0.44098	0.999995	2.17148e-06	0.8968	0.43194
NDNL2	-2.2773	0.153752	0.813179	0.7836	0.014983
NEDD8
NEIL1	0.42219	0.999995	2.17148e-06	0.46191	0.98549
NEIL2	-0.50222	0.999995	2.17148e-06	0.57884	0.6224
NEIL3	0.76844	0.282074	0.549637	0.010948	0.99771
NEK1	0.76405	0.644281	0.190925	0.066058	0.97501
NEK11	0.49411	0.999995	2.17148e-06	0.39722	0.99076
NEK6	0.29323	0.999995	2.17148e-06	0.85799	0.96225
NEK8	0.42005	0.987577	0.00542903	0.31566	0.89867
NEK9	0.46153	0.999995	2.17148e-06	0.48563	0.90898
NELFB	-1.7704	0.26961	0.569264	0.97031	0.034163
NFATC2IP	0.39974	0.999995	2.17148e-06	0.43723	0.91574
NFE2L2	-0.21852	0.999995	2.17148e-06	0.64072	0.32054
NFRKB	0.96579	0.520094	0.283918	0.03991	0.87328
NHEJ1	0.49871	0.999995	2.17148e-06	0.36375	0.59452
NHP2	-4.6034	0.230221	0.637855	0.97241	0.028121
NIPBL	1.2583	0.644281	0.190925	0.068282	0.67377
NLK	1.4804	0.31045	0.508008	0.01453	0.7737
NONO	-1.1817	0.877748	0.0566302	0.85928	0.22946
NOP10	-2.8938	0.326578	0.486013	0.60487	0.046228
NOTCH1	0.50709	0.999995	2.17148e-06	0.47687	0.95373
NOTCH2	0.44802	0.999995	2.17148e-06	0.35762	0.83878
NOTCH3	1.1892	0.369281	0.432643	0.021921	0.9812
NOTCH4	-0.079581	0.999995	2.17148e-06	0.80113	0.71233
NPM1
NSMCE1	0.53099	0.943056	0.0254625	0.2896	0.1891
NSMCE2	-2.6838	0.686598	0.163297	0.91071	0.15362
NSMCE4A	-2.4128	0.534655	0.271926	0.97321	0.10681
NTHL1	-0.024004	0.999995	2.17148e-06	0.13072	0.74441
NUDT1	0.62342	0.674891	0.170766	0.09683	0.90589
NUDT16L1	-0.38754	0.999995	2.17148e-06	0.8476	0.3598
OBFC1	-0.827	0.895291	0.0480358	0.25318	0.2412
OGG1	0.60659	0.990184	0.0042841	0.32064	0.93026
OPRM1	0.73568	0.897078	0.0471698	0.22584	0.82331
OR10A7	0.98439	0.548337	0.260952	0.043817	0.98713
OR10AD1	0.76568	0.899936	0.0457884	0.23423	0.94247
OR10G2	-1.0077	0.981356	0.00817342	0.7156	0.28567
OR10H3
OR10H5	0.76549	0.897078	0.0471698	0.22535	0.77603
OR10Q1	0.24681	0.999995	2.17148e-06	0.60868	0.89047
OR10R2	0.23568	0.999995	2.17148e-06	0.53197	0.95012
OR10S1	-0.21344	0.999995	2.17148e-06	0.65523	0.52131
OR10T2	0.58519	0.999995	2.17148e-06	0.39078	0.81567
OR10V1	0.83325	0.670143	0.173833	0.08506	0.79841
OR10Z1	0.81429	0.35996	0.443746	0.019313	0.99559
OR11H1
OR11H6	0.91804	0.644281	0.190925	0.060999	0.97553
OR13A1	0.46605	0.999995	2.17148e-06	0.37359	0.94712
OR13C2
OR13C4	0.42154	0.999995	2.17148e-06	0.34327	0.69268
OR13J1	1.7633	0.357157	0.447141	0.017532	0.9735
OR1A2	0.83918	0.943056	0.0254625	0.28798	0.71309
OR1D5
OR1E1
OR1E2
OR1F1	0.48318	0.999995	2.17148e-06	0.37961	0.93421
OR1I1	-0.80697	0.999995	2.17148e-06	0.80118	0.32277
OR1L4	0.56574	0.674891	0.170766	0.097332	0.95958
OR1L6	-0.4107	0.999995	2.17148e-06	0.81585	0.59086
OR1N1	0.42413	0.999995	2.17148e-06	0.404	0.59701
OR2B11	0.24107	0.990184	0.0042841	0.33006	0.89653
OR2F2	0.24191	0.999995	2.17148e-06	0.40779	0.94673
OR2L13	0.50887	0.929344	0.0318235	0.24576	0.96964
OR2L2
OR2T10	0.6674	0.990184	0.0042841	0.32836	0.77947
OR2T29
OR2T35
OR2V2	0.51246	0.882621	0.0542257	0.20823	0.89752
OR4A47
OR4A5
OR4B1	1.6187	0.228718	0.6407	0.0032032	0.99878
OR4C11	0.51164	0.999995	2.17148e-06	0.43109	0.71453
OR4C45
OR4C46
OR4D1	0.73432	0.829417	0.0812271	0.17611	0.78164
OR4D5	0.056577	0.999995	2.17148e-06	0.79836	0.86894
OR4D6	0.23663	0.854689	0.0681919	0.19318	0.92838
OR4F15	0.62385	0.987577	0.00542903	0.31524	0.80781
OR4F21
OR4F6	1.2272	0.687178	0.162931	0.10441	0.80538
OR4K1	0.39891	0.999995	2.17148e-06	0.45759	0.8089
OR4K14	0.25144	0.999995	2.17148e-06	0.38476	0.85646
OR4K17	0.25691	0.999995	2.17148e-06	0.42564	0.63045
OR4L1	1.1653	0.369281	0.432643	0.021655	0.99409
OR4N5	1.2173	0.774154	0.111173	0.14466	0.91626
OR4P4
OR51B4	0.5901	0.999995	2.17148e-06	0.41281	0.64092
OR51F1	1.0006	0.943056	0.0254625	0.26456	0.94248
OR51G2	0.92479	0.644281	0.190925	0.067091	0.95595
OR51I1	1.8078	0.282074	0.549637	0.010299	0.99727
OR51I2	-0.37158	0.999995	2.17148e-06	0.6545	0.75542
OR51M1	1.3423	0.687178	0.162931	0.10512	0.93969
OR52A5	0.78693	0.854689	0.0681919	0.19124	0.88585
OR52B2	1.252	0.943056	0.0254625	0.25756	0.83298
OR52B4	0.73952	0.943056	0.0254625	0.28171	0.77472
OR52B6	0.60599	0.943056	0.0254625	0.26094	0.95977
OR52H1	0.81473	0.999995	2.17148e-06	0.35802	0.96645
OR52I1
OR52K1	0.37923	0.999995	2.17148e-06	0.49547	0.75298
OR52L1	2.2691	0.372179	0.429248	0.023023	0.97739
OR52M1	1.2164	0.644281	0.190925	0.063115	0.97459
OR52N5	1.3488	0.369281	0.432643	0.020996	0.99224
OR52R1	1.1469	0.275718	0.559535	0.0094424	0.99633
OR56A1
OR56A3	0.0043846	0.999995	2.17148e-06	0.52165	0.5607
OR56B1	0.59607	0.999995	2.17148e-06	0.3552	0.5896
OR5A2	1.0584	0.644281	0.190925	0.0684	0.97241
OR5AK2
OR5AN1	0.38585	0.999995	2.17148e-06	0.4167	0.58445
OR5AP2	1.3451	0.206466	0.685151	0.0023569	0.99948
OR5AR1	1.1789	0.7049	0.151872	0.10909	0.93471
OR5B3
OR5F1
OR5L1
OR5L2
OR5M10
OR5M9	0.10685	0.999995	2.17148e-06	0.83726	0.87797
OR5R1	0.32076	0.999995	2.17148e-06	0.44729	0.5715
OR5T1
OR6B1	0.19911	0.999995	2.17148e-06	0.40987	0.61146
OR6B2	0.0055188	0.999995	2.17148e-06	0.50255	0.49743
OR6C4	0.29341	0.999995	2.17148e-06	0.53888	0.75346
OR6C6
OR6C68	1.064	0.943056	0.0254625	0.26672	0.73515
OR6C74	1.1232	0.774154	0.111173	0.14493	0.85622
OR6K2	0.050185	0.999995	2.17148e-06	0.8353	0.86769
OR6K3	1.2781	0.31045	0.508008	0.014343	0.99444
OR6K6	1.294	0.758763	0.119894	0.12691	0.90456
OR6N2	0.59775	0.760417	0.118948	0.13486	0.92265
OR6V1	1.4378	0.31045	0.508008	0.014402	0.99687
OR6X1	0.49988	0.999995	2.17148e-06	0.43014	0.87661
OR7A5
OR7D4
OR7G3	-0.068148	0.999995	2.17148e-06	0.69853	0.66148
OR8B3
OR8B8	0.25112	0.999995	2.17148e-06	0.44456	0.57314
OR8D2	0.21531	0.999995	2.17148e-06	0.45857	0.54129
OR8G1
OR8G2
OR8G5
OR8J3	0.051216	0.999995	2.17148e-06	0.47568	0.77331
OR8K3	-0.3793	0.999995	2.17148e-06	0.58953	0.41166
OR8U1
OR9G1	0.032309	0.999995	2.17148e-06	0.71347	0.61404
OR9I1	1.2331	0.764704	0.116507	0.13793	0.94343
ORC2	-1.0717	0.715205	0.145569	0.97534	0.169
OTUB1	-0.60498	0.999995	2.17148e-06	0.63622	0.46302
OTUB2	0.27441	0.999995	2.17148e-06	0.78426	0.81082
OTUD7B	0.37009	0.999995	2.17148e-06	0.45815	0.8231
PAGR1	-0.20313	0.999995	2.17148e-06	0.71059	0.72329
PAK1	0.8134	0.943056	0.0254625	0.25631	0.71164
PALB2	-0.41799	0.999995	2.17148e-06	0.82685	0.5602
PAPD7	0.50469	0.999995	2.17148e-06	0.34224	0.96357
PARG
PARK2	0.76279	0.644281	0.190925	0.068282	0.93829
PARK7	-0.069465	0.999995	2.17148e-06	0.49891	0.41637
PARP1	-0.57615	0.999995	2.17148e-06	0.77288	0.30764
PARP14	0.65666	0.990184	0.0042841	0.32516	0.96887
PARP15	0.88022	0.834405	0.0786231	0.1787	0.92619
PARP2	0.54142	0.999995	2.17148e-06	0.39706	0.67108
PARP3	-0.17567	0.999995	2.17148e-06	0.55012	0.50573
PARP4	0.25053	0.999995	2.17148e-06	0.44091	0.98831
PARP9	0.45766	0.999995	2.17148e-06	0.46926	0.84456
PARPBP	0.99902	0.292488	0.533892	0.011686	0.99184
PAXIP1	0.73224	0.990184	0.0042841	0.32644	0.74206
PBRM1	0.67656	0.811416	0.0907564	0.16025	0.98947
PCID2	-1.4811	0.256346	0.591173	0.92986	0.031604
PCNA	-4.8091	0.056034	1.25155	0.9441	0.0018255
PDS5A	-0.22403	0.999995	2.17148e-06	0.87969	0.88372
PDS5B	-0.39976	0.999995	2.17148e-06	0.94702	0.76947
PER1	0.73071	0.372179	0.429248	0.023367	0.99425
PER2	0.82177	0.670143	0.173833	0.08568	0.98532
PER3	-0.25964	0.999995	2.17148e-06	0.70161	0.55175
PGBD5	0.58075	0.899936	0.0457884	0.23003	0.98475
PHF11	1.3075	0.670143	0.173833	0.08264	0.9534
PHF3	0.043783	0.999995	2.17148e-06	0.85321	0.9805
PHIP	1.1608	0.644281	0.190925	0.060064	0.90032
PIAS1	0.63766	0.943056	0.0254625	0.28649	0.98633
PIAS2	0.44918	0.999995	2.17148e-06	0.57103	0.73348
PIAS3	0.15851	0.999995	2.17148e-06	0.93831	0.73408
PIAS4	0.69931	0.9923	0.00335701	0.33376	0.87684
PIF1	0.65532	0.943056	0.0254625	0.26978	0.91322
PIN1	0.14106	0.999995	2.17148e-06	0.50726	0.74908
PINK1	0.55104	0.943056	0.0254625	0.27354	0.88783
PINX1
PLK1	-1.6776	0.40273	0.394986	0.46038	0.068754
PLRG1	-1.7089	0.057786	1.23818	0.9996	0.0021109
PML	0.14566	0.999995	2.17148e-06	0.48942	0.96325
PMP22	0.12878	0.999995	2.17148e-06	0.72377	0.90845
PMS1	0.12763	0.999995	2.17148e-06	0.69102	0.82741
PMS2	-0.023453	0.999995	2.17148e-06	0.5366	0.56167
PNKP	-1.4427	0.699861	0.154988	0.82822	0.16297
PNN	-3.7489	0.037716	1.42347	0.99986	0.00081188
POLA1	-1.7439	0.40273	0.394986	0.52649	0.068439
POLB	-0.073012	0.999995	2.17148e-06	0.83984	0.93613
POLD1	-1.6181	0.371889	0.429587	0.4837	0.055469
POLD2	-2.3186	0.204517	0.689271	0.95405	0.022413
POLD3	-0.81822	0.999995	2.17148e-06	0.91315	0.32296
POLD4	0.78249	0.990184	0.0042841	0.3229	0.47356
POLE	-1.3139	0.280772	0.551646	0.97161	0.036741
POLE2	-5.2708	0.054757	1.26156	0.99964	0.0016877
POLE3	-3.4679	0.136532	0.864766	0.99527	0.012001
POLE4	-0.17653	0.999995	2.17148e-06	0.88808	0.51465
POLG	-1.0889	0.606568	0.217121	0.83523	0.12533
POLG2	-0.047455	0.999995	2.17148e-06	0.96207	0.95249
POLH	-0.96218	0.684328	0.164736	0.654	0.15233
POLI	0.37652	0.999995	2.17148e-06	0.6746	0.94903
POLK	0.20767	0.999995	2.17148e-06	0.46991	0.81423
POLL	-0.63028	0.999995	2.17148e-06	0.12167	0.39372
POLM	-0.10476	0.999995	2.17148e-06	0.76432	0.72106
POLN	0.91698	0.579711	0.236788	0.046986	0.83267
POLQ	0.83946	0.685835	0.16378	0.10334	0.71623
POLR2A	-4.7393	0.037716	1.42347	0.95136	0.00077252
POLR2B	-1.7119	0.370656	0.431029	0.99485	0.053963
POLR2C	-7.9501	0.05704	1.24382	0.65774	0.0019534
POLR2D	-6.6115	0.107256	0.969578	0.99628	0.0073069
POLR2E	-3.1616	0.196579	0.706463	0.94924	0.020622
POLR2F	-0.52199	0.999995	2.17148e-06	0.95968	0.45153
POLR2G	-2.7535	0.153752	0.813179	0.9622	0.014894
POLR2H	-2.2394	0.431721	0.364797	0.97897	0.077375
POLR2I	-3.2257	0.033621	1.47339	0.99984	0.00056586
POLR2J
POLR2K
POLR2L	-5.4198	0.03125	1.50515	0.9993	0.00034935
POT1	-0.33596	0.999995	2.17148e-06	0.46773	0.36374
PPM1D	-1.7569	0.153752	0.813179	0.91681	0.015101
PPM1G	-1.4176	0.519857	0.284116	0.94641	0.10267
PPP4C	-1.0426	0.699861	0.154988	0.86762	0.16135
PPP4R1	-0.51913	0.999995	2.17148e-06	0.70037	0.52157
PPP4R2	-0.73071	0.895291	0.0480358	0.76392	0.23765
PPP4R4	-0.16941	0.999995	2.17148e-06	0.46293	0.73208
PPP5C	0.23304	0.999995	2.17148e-06	0.72731	0.96727
PPP6C	-1.1282	0.376319	0.424444	0.98249	0.057565
PPP6R1	0.6642	0.661719	0.179326	0.077493	0.92164
PPP6R2	0.25075	0.999995	2.17148e-06	0.59211	0.89118
PPP6R3	1.3399	0.119073	0.924187	0.0010579	0.99981
PRDM10	-0.6326	0.999995	2.17148e-06	0.76776	0.37816
PRDM9
PRIMPOL
PRKCG	0.56257	0.999995	2.17148e-06	0.34453	0.92798
PRKDC
PRMT1	-3.6118	0.037716	1.42347	0.86076	0.00086108
PRMT6	0.2107	0.999995	2.17148e-06	0.65462	0.89024
PRMT8	1.8857	0.228718	0.6407	0.0034689	0.99916
PRPF19	-3.8581	0.080799	1.09259	0.99892	0.0050337
PSIP1	0.049491	0.999995	2.17148e-06	0.59632	0.63608
PSMD14	-4.1891	0.080799	1.09259	0.99891	0.005073
PSME3	-3.0892	0.07044	1.15218	0.99947	0.0030556
PTEN
PTPN2	-0.27921	0.999995	2.17148e-06	0.70932	0.44087
PXMP2	-0.46502	0.999995	2.17148e-06	0.91235	0.48759
RAD1	-1.3452	0.928504	0.0322162	0.73972	0.2618
RAD17	0.17109	0.999995	2.17148e-06	0.45098	0.62666
RAD18	-0.56266	0.999995	2.17148e-06	0.7737	0.52197
RAD21	0.71407	0.999995	2.17148e-06	0.37873	0.78586
RAD23A	-0.37355	0.999995	2.17148e-06	0.67818	0.83669
RAD23B
RAD50	-1.1782	0.43499	0.361521	0.93722	0.078457
RAD51	-1.5417	0.813432	0.0896787	0.45992	0.20614
RAD51AP1	0.8231	0.780557	0.107595	0.14948	0.96661
RAD51B	-1.0031	0.791897	0.101331	0.36728	0.19707
RAD51C	-3.5427	0.21108	0.675553	0.99382	0.024578
RAD51D	-1.7924	0.389468	0.409528	0.63398	0.063578
RAD52	-0.11075	0.999995	2.17148e-06	0.74495	0.60968
RAD54B	0.94449	0.720771	0.142203	0.11272	0.72555
RAD54L	-0.0065591	0.999995	2.17148e-06	0.847	0.89975
RAD54L2	-0.090596	0.999995	2.17148e-06	0.87994	0.68486
RAD9A	-1.6801	0.229953	0.638361	0.99646	0.027825
RAD9B	0.95302	0.357269	0.447005	0.017945	0.99512
RAG1	0.53118	0.943056	0.0254625	0.29067	0.9704
RAG2	-0.27174	0.999995	2.17148e-06	0.11638	0.80896
RAP1A
RASSF7	0.26124	0.999995	2.17148e-06	0.53744	0.77278
RBBP7	-0.57929	0.999995	2.17148e-06	0.76377	0.51671
RBBP8	-1.5396	0.804591	0.0944248	0.8203	0.20298
RBM7
RBX1	1.1856	0.873035	0.0589683	0.20331	0.7983
RECQL	0.061523	0.999995	2.17148e-06	0.81273	0.81884
RECQL4
RECQL5	0.30692	0.788362	0.103274	0.15299	0.96451
REV1	1.0755	0.671708	0.172819	0.087964	0.66325
REV3L	-0.71153	0.791897	0.101331	0.99132	0.19695
RFC1	-1.334	0.123128	0.909643	0.99782	0.010299
RFC2	-3.1316	0.196579	0.706463	0.86527	0.021074
RFC3	-2.8866	0.123128	0.909643	0.97952	0.010682
RFC4	-1.1291	0.999995	2.17148e-06	0.26965	0.29856
RFC5	-2.0007	0.03125	1.50515	0.99996	0.00029031
RFWD3	-2.2564	0.072924	1.13713	0.9419	0.0036166
RHNO1	0.86554	0.990184	0.0042841	0.32782	0.76636
RHO	0.75349	0.943056	0.0254625	0.2897	0.97694
RIF1	-0.30917	0.999995	2.17148e-06	0.96527	0.50676
RING1	1.3373	0.425959	0.370632	0.030089	0.99158
RINN1
RMI1	0.9471	0.895215	0.0480726	0.22074	0.78086
RMI2	0.21209	0.943056	0.0254625	0.26867	0.74993
RNASEH2A	-2.2638	0.123128	0.909643	0.88167	0.010564
RNF10	-0.15353	0.999995	2.17148e-06	0.70978	0.78614
RNF111	1.0342	0.670143	0.173833	0.082384	0.93034
RNF113A	-0.86338	0.999995	2.17148e-06	0.97814	0.2935
RNF113B	0.60766	0.973161	0.0118153	0.30816	0.87177
RNF126	0.036563	0.999995	2.17148e-06	0.68134	0.68622
RNF138	1.2002	0.648615	0.188013	0.0696	0.77623
RNF146	2.511	0.001078	2.96738	4.9205e-06	0.98215
RNF165	1.0898	0.31045	0.508008	0.01332	0.93354
RNF168	-0.50845	0.999995	2.17148e-06	0.24602	0.34649
RNF169	-0.14921	0.999995	2.17148e-06	0.46478	0.42827
RNF17	0.72467	0.758763	0.119894	0.13079	0.98055
RNF2	0.44647	0.999995	2.17148e-06	0.43428	0.74103
RNF20	-1.0968	0.370656	0.431029	0.99482	0.054583
RNF4	-0.31568	0.999995	2.17148e-06	0.61987	0.483
RNF40	-1.2882	0.699861	0.154988	0.97954	0.16002
RNF7	0.020975	0.999995	2.17148e-06	0.42917	0.57089
RNF8	-1.7597	0.371889	0.429587	0.98951	0.056463
RPA1	-1.861	0.209158	0.679526	0.96417	0.023899
RPA2	-1.0743	0.789332	0.10274	0.60049	0.19439
RPA3
RPA4	0.93104	0.660179	0.180338	0.07457	0.96908
RPAIN	-0.40549	0.999995	2.17148e-06	0.19946	0.42857
RPS27L
RRM1	-2.4391	0.325028	0.488079	0.98869	0.045578
RRM2	-0.90974	0.898316	0.0465709	0.81606	0.24304
RRM2B	0.44273	0.947816	0.023276	0.29422	0.83475
RTEL1	-2.7159	0.037716	1.42347	0.99933	0.00077252
RTF1	-1.5369	0.90804	0.041895	0.96472	0.24774
RTFDC1	-1.9721	0.119253	0.923531	0.99795	0.0093538
RUVBL1	-2.6655	0.019397	1.71227	0.99998	0.00013285
RUVBL2	-2.191	0.378592	0.421829	0.88819	0.05846
SAE1	-2.1886	0.280772	0.551646	0.89962	0.036859
SALL4	0.40805	0.999995	2.17148e-06	0.5641	0.84151
SAMHD1	0.15525	0.999995	2.17148e-06	0.65482	0.65426
SCAF11	0.12447	0.999995	2.17148e-06	0.83564	0.84287
SCAF4	1.2399	0.250761	0.60074	0.0048664	0.99808
SCAF8	0.29394	0.870031	0.0604653	0.20162	0.76817
SCAI	0.14527	0.882621	0.0542257	0.20856	0.88355
SENP2	-0.33607	0.999995	2.17148e-06	0.92572	0.85996
SENP6	-1.4379	0.610031	0.214648	0.97721	0.12813
SENP7	-0.32395	0.999995	2.17148e-06	0.3805	0.68418
SENP8	1.2551	0.380293	0.419882	0.024489	0.9908
SERBP1
SET	0.22957	0.842527	0.0744162	0.18563	0.44124
SETD2	-0.1728	0.999995	2.17148e-06	0.70104	0.83378
SETD8
SETDB1	-0.07955	0.999995	2.17148e-06	0.89109	0.76916
SETMAR	0.70484	0.931423	0.030853	0.24774	0.99189
SETX	0.17102	0.813968	0.0893927	0.16724	0.71075
SF3B1	-3.2613	0.077669	1.10975	0.99911	0.0045908
SFPQ	-3.2347	0.062304	1.20548	0.75159	0.0023471
SFR1	0.18303	0.999995	2.17148e-06	0.46088	0.53854
SHFM1	-0.40625	0.999995	2.17148e-06	0.5609	0.42727
SHPRH	0.20102	0.999995	2.17148e-06	0.56275	0.93132
SIN3A	-1.6846	0.371889	0.429587	0.98134	0.056236
SIRT1	-0.34787	0.999995	2.17148e-06	0.76083	0.60487
SIRT2	-0.38328	0.999995	2.17148e-06	0.42182	0.50376
SIRT3	0.13064	0.999995	2.17148e-06	0.93274	0.80085
SIRT4	-0.70705	0.942943	0.0255146	0.91694	0.27073
SIRT5	1.1898	0.35996	0.443746	0.019096	0.99563
SIRT6	-0.12861	0.999995	2.17148e-06	0.58827	0.46645
SIRT7	0.19529	0.869303	0.0608288	0.20046	0.9499
SKIV2L2	-1.0046	0.93637	0.0285525	0.98773	0.26509
SKP1
SLBP	0.15358	0.999995	2.17148e-06	0.74381	0.80693
SLFN11	0.092716	0.999995	2.17148e-06	0.84209	0.8254
SLX1A
SLX4	-2.3323	0.40273	0.394986	0.59904	0.068488
SLX4IP	0.25464	0.999995	2.17148e-06	0.36999	0.75465
SMARCA2	-0.095223	0.999995	2.17148e-06	0.6123	0.89847
SMARCA4	-0.50393	0.999995	2.17148e-06	0.67092	0.43215
SMARCA5	-1.1317	0.895291	0.0480358	0.49765	0.23814
SMARCAD1	0.97654	0.672667	0.1722	0.0913	0.98956
SMARCAL1	0.18857	0.999995	2.17148e-06	0.3482	0.82926
SMARCB1	-1.0688	0.500697	0.300425	0.99439	0.095452
SMARCC2	1.1835	0.35996	0.443746	0.019116	0.95973
SMARCD1	0.26903	0.999995	2.17148e-06	0.6277	0.87447
SMARCE1	-0.32424	0.999995	2.17148e-06	0.6129	0.45948
SMC1A	-2.1744	0.452936	0.343963	0.99072	0.082649
SMC1B	0.53471	0.828914	0.0814905	0.17506	0.98132
SMC2	-3.2581	0.048906	1.31064	0.99934	0.0013827
SMC3	-1.172	0.509462	0.292888	0.38322	0.098287
SMC4	-1.3603	0.639687	0.194032	0.95315	0.13801
SMC5	-0.86107	0.699861	0.154988	0.99262	0.15755
SMC6	-0.26056	0.999995	2.17148e-06	0.61607	0.66151
SMEK2	0.27567	0.999995	2.17148e-06	0.70946	0.71244
SMG1	-2.6784	0.123128	0.909643	0.99785	0.010141
SMG6	-0.21887	0.999995	2.17148e-06	0.45322	0.77446
SMUG1	0.057826	0.999995	2.17148e-06	0.45796	0.81741
SOD1	-0.98227	0.116379	0.934125	0.95095	0.0083107
SP100	0.85425	0.765448	0.116084	0.13956	0.71797
SP140	1.4377	0.323173	0.490565	0.015495	0.97505
SPIDR
SPO11	0.70027	0.644281	0.190925	0.066983	0.97294
SPRTN	-1.388	0.056034	1.25155	0.99966	0.001855
SPTBN1	1.4414	0.252802	0.597219	0.0057717	0.66735
SSBP1	-0.6074	0.999995	2.17148e-06	0.66003	0.34344
SSBP2	0.27743	0.999995	2.17148e-06	0.72019	0.91031
SSBP3	0.29926	0.999995	2.17148e-06	0.40215	0.91033
SSRP1	-2.2559	0.263989	0.578414	0.7328	0.033149
STAG1	0.49608	0.929344	0.0318235	0.24613	0.80303
STAG2	0.21384	0.780557	0.107595	0.1497	0.91144
STRA13	-0.37057	0.999995	2.17148e-06	0.50532	0.72177
SUMO1
SUMO2
SUMO3	0.88074	0.670143	0.173833	0.083752	0.99137
SUMO4
SUPT16H	-0.3191	0.802964	0.0953039	0.6038	0.20074
SUPT4H1	-1.5833	0.829992	0.0809261	0.87185	0.21224
SUPT5H	-0.44437	0.999995	2.17148e-06	0.51851	0.51493
SUPT6H	-3.7256	0.03125	1.50515	0.99994	0.00042808
SUV39H1	0.4235	0.999995	2.17148e-06	0.55028	0.72235
SUV39H2	-0.37175	0.999995	2.17148e-06	0.69131	0.51138
SUV420H1	-1.8474	0.342399	0.465468	0.79931	0.049003
SUV420H2	0.70514	0.899936	0.0457884	0.23348	0.9849
SWI5
Scrambled
TADA2B	1.6199	0.282074	0.549637	0.010643	0.75581
TADA3	0.57847	0.966859	0.0146369	0.30132	0.73264
TAF1	-1.1999	0.59102	0.228398	0.94538	0.12144
TAF1L	0.070577	0.999995	2.17148e-06	0.48492	0.52809
TAF6L	0.47603	0.943056	0.0254625	0.27477	0.90342
TAF9	-1.7306	0.760796	0.118732	0.81632	0.18412
TAOK2	1.7879	0.119073	0.924187	0.0010874	0.96241
TAOK3	0.82263	0.841871	0.0747545	0.18356	0.98802
TCEA1	0.45141	0.999995	2.17148e-06	0.36221	0.6403
TCEB1
TCEB2	-0.76382	0.999995	2.17148e-06	0.74941	0.37518
TCEB3	0.036551	0.999995	2.17148e-06	0.79521	0.89401
TCOF1	0.6283	0.780557	0.107595	0.14829	0.43472
TDG
TDP1	0.24946	0.999995	2.17148e-06	0.83237	0.96876
TDP2	-0.82269	0.895291	0.0480358	0.71299	0.23936
TELO2	-0.2559	0.999995	2.17148e-06	0.75908	0.51016
TEN1	-1.6079	0.419568	0.377198	0.97919	0.073281
TEP1	0.40807	0.999995	2.17148e-06	0.647	0.7078
TERF1	-0.64094	0.999995	2.17148e-06	0.56995	0.41693
TERF2
TERF2IP	1.9574	0.644281	0.190925	0.060606	0.96616
TERT	-0.10584	0.999995	2.17148e-06	0.88002	0.82449
TET2	0.008002	0.999995	2.17148e-06	0.44564	0.78993
TFPT	1.347	0.383249	0.416519	0.025375	0.9421
THOC1	-0.63072	0.942943	0.0255146	0.61768	0.27136
THOC2	-3.6349	0.048906	1.31064	0.99975	0.0014515
THRAP3	1.2514	0.436141	0.360373	0.032362	0.98897
TICRR	-6.9491	0.006466	2.18936	0.99966	1.4761e-05
TIMELESS	-2.1005	0.494139	0.306151	0.62181	0.09251
TINF2	-2.087	0.140571	0.852104	0.9955	0.012818
TIPIN	-0.59707	0.999995	2.17148e-06	0.65845	0.34515
TNKS	0.11807	0.999995	2.17148e-06	0.86334	0.73531
TNP1	0.75364	0.943056	0.0254625	0.27704	0.72246
TONSL	-0.41364	0.59102	0.228398	0.94559	0.12129
TOP1	-1.8117	0.072924	1.13713	0.99929	0.0038921
TOP2A	-3.1963	0.065493	1.18381	0.82026	0.0026915
TOP2B	0.7557	0.820441	0.0859526	0.17233	0.97368
TOP3A	-1.6215	0.378592	0.421829	0.69627	0.059641
TOP3B	0.45436	0.723068	0.140821	0.11508	0.63989
TOPBP1	-1.5799	0.500601	0.300508	0.89166	0.094291
TOPORS	0.56521	0.990184	0.0042841	0.32142	0.77157
TP53	3.3576	0.001078	2.96738	4.9205e-06	1
TP53BP1	1.1935	0.258769	0.587088	0.0085666	0.9981
TP63	0.27054	0.999995	2.17148e-06	0.36618	0.88118
TP73	0.65376	0.520094	0.283918	0.040373	0.93073
TPP1	0.75734	0.252802	0.597219	0.0055552	0.99887
TRAIP	-1.8313	0.370656	0.431029	0.69369	0.054504
TRAPPC13	-1.169	0.915423	0.0383782	0.88846	0.25581
TREX1	0.27817	0.999995	2.17148e-06	0.55552	0.6394
TREX2	1.1264	0.644281	0.190925	0.062908	0.80986
TRIM28	-0.43957	0.999995	2.17148e-06	0.71199	0.33337
TRIM29	0.54857	0.999995	2.17148e-06	0.4672	0.93255
TRIM34
TRIM65	0.24483	0.999995	2.17148e-06	0.43779	0.90388
TRIP12	0.75155	0.723068	0.140821	0.11563	0.98889
TRIP13	-3.1422	0.116379	0.934125	0.064207	0.0083697
TRRAP	-1.6679	0.123128	0.909643	0.99777	0.0098459
TTI1	-3.3864	0.03125	1.50515	0.99994	0.00042808
TTI2	-2.4482	0.226232	0.645446	0.98005	0.027117
TYMS	0.12033	0.852982	0.0690601	0.1889	0.82434
UBA1	-3.1226	0.006466	2.18936	1	1.4761e-05
UBA2	-2.7292	0.086281	1.06408	0.8106	0.0057127
UBA3	-2.1861	0.048002	1.31874	0.56731	0.0011662
UBB
UBC	-0.82734	0.999995	2.17148e-06	0.69206	0.30935
UBE2A	0.2402	0.999995	2.17148e-06	0.5677	0.85396
UBE2B	0.70067	0.812818	0.0900067	0.16331	0.96014
UBE2C	-1.8887	0.659596	0.180722	0.85852	0.14306
UBE2D1	1.4121	0.254898	0.593634	0.0064016	0.97387
UBE2D2
UBE2D3
UBE2D4	0.5783	0.990184	0.0042841	0.32296	0.67867
UBE2F	0.5826	0.992323	0.00334694	0.33644	0.90672
UBE2I	-1.7368	0.198775	0.701638	0.99411	0.021557
UBE2K	1.5157	0.660179	0.180338	0.072621	0.91205
UBE2M
UBE2N	0.66075	0.973161	0.0118153	0.30826	0.69319
UBE2NL
UBE2R2	1.2618	0.660179	0.180338	0.074383	0.95612
UBE2S
UBE2T	-1.7921	0.545087	0.263534	0.97235	0.10952
UBE2U
UBE2V1
UBE2V2	0.34015	0.999995	2.17148e-06	0.39843	0.60353
UBE2W
UBR5	0.72591	0.897078	0.0471698	0.22632	0.72146
UCHL3	-0.22347	0.999995	2.17148e-06	0.64338	0.69375
UCHL5	-0.92527	0.740579	0.130429	0.54711	0.17734
UHRF1
UHRF2	0.20376	0.999995	2.17148e-06	0.67618	0.94754
UIMC1	0.13961	0.999995	2.17148e-06	0.65795	0.64167
UNG	0.22483	0.999995	2.17148e-06	0.81883	0.91116
UPF1	-2.2635	0.079131	1.10165	0.99904	0.0047876
USP1	-1.7532	0.820145	0.0861094	0.87416	0.20878
USP10	-2.0527	0.371889	0.429587	0.50615	0.056325
USP11	0.41154	0.999995	2.17148e-06	0.5645	0.95938
USP13	0.24646	0.999995	2.17148e-06	0.62014	0.88022
USP14	0.53267	0.644281	0.190925	0.067917	0.87719
USP15	0.58161	0.674891	0.170766	0.094193	0.99559
USP20	-0.47016	0.999995	2.17148e-06	0.6752	0.47224
USP22	0.46991	0.999995	2.17148e-06	0.54972	0.92839
USP26	-0.0065816	0.999995	2.17148e-06	0.57067	0.82495
USP28	0.77652	0.228718	0.6407	0.0041775	0.97644
USP3	0.37383	0.999995	2.17148e-06	0.39195	0.82296
USP34	0.065962	0.999995	2.17148e-06	0.41232	0.72099
USP37	-1.8532	0.196579	0.706463	0.76227	0.020828
USP4	0.6304	0.943056	0.0254625	0.26721	0.88471
USP44	0.67842	0.812818	0.0900067	0.16299	0.71013
USP45	-0.051948	0.999995	2.17148e-06	0.50047	0.83793
USP47	-0.1506	0.999995	2.17148e-06	0.80693	0.93776
USP48	0.029948	0.999995	2.17148e-06	0.37433	0.83287
USP5	-2.8182	0.072924	1.13713	0.9992	0.0040004
USP51	0.77042	0.813968	0.0893927	0.16782	0.97743
USP7	-2.6599	0.033621	1.47339	0.9999	0.00053633
UVRAG	-0.082067	0.999995	2.17148e-06	0.28512	0.31211
UVSSA	-0.051516	0.999995	2.17148e-06	0.57222	0.59915
VCP	-3.8668	0.048906	1.31064	0.99975	0.0014122
WAPAL	-0.34993	0.999995	2.17148e-06	0.58535	0.35176
WDR48	-0.58834	0.999995	2.17148e-06	0.9885	0.31741
WDR70	-5.7474	0.0625	1.20412	0.94186	0.0024258
WDR76	-0.5056	0.999995	2.17148e-06	0.7392	0.41693
WEE1	-1.9038	0.40273	0.394986	0.827	0.068961
WHSC1	-0.66215	0.999995	2.17148e-06	0.93451	0.48934
WRAP53	-2.4973	0.209158	0.679526	0.84965	0.024115
WRN	0.22514	0.999995	2.17148e-06	0.58225	0.96433
WRNIP1	0.90394	0.813968	0.0893927	0.16911	0.98192
XAB2	-1.5977	0.494139	0.306151	0.19916	0.09251
XPA	-0.7911	0.999995	2.17148e-06	0.87271	0.31947
XPC	-0.31097	0.999995	2.17148e-06	0.56062	0.5925
XRCC1	0.35143	0.999995	2.17148e-06	0.58422	0.93573
XRCC2	-0.73993	0.999995	2.17148e-06	0.67071	0.36105
XRCC3	-3.3561	0.03125	1.50515	0.90897	0.00042808
XRCC4	0.39565	0.999995	2.17148e-06	0.43677	0.70773
XRCC5	-0.53179	0.999995	2.17148e-06	0.088465	0.41009
XRCC6
XRCC6BP1	-0.90006	0.999995	2.17148e-06	0.50712	0.3055
YBX1
YTHDF2	0.057093	0.999995	2.17148e-06	0.74844	0.72043
ZBTB2	0.6279	0.723068	0.140821	0.11554	0.85199
ZBTB32	0.81342	0.882771	0.0541519	0.21266	0.99624
ZDHHC16	0.34892	0.999995	2.17148e-06	0.94247	0.9582
ZMPSTE24	-0.7849	0.910556	0.0406933	0.85569	0.25051
ZMYM3	0.053609	0.999995	2.17148e-06	0.71009	0.95327
ZMYND8	0.16671	0.999995	2.17148e-06	0.82189	0.8032
ZNF451	0.20474	0.999995	2.17148e-06	0.44685	0.97329
ZNF827	-0.35712	0.999995	2.17148e-06	0.67946	0.64192
ZRANB3	0.39083	0.999995	2.17148e-06	0.62786	0.92284
ZSWIM7	0.43562	0.999995	2.17148e-06	0.44037	0.76088

## Sheet: UBC, WT
Gene	lfc	fdr	fdr_log10	pos_p	neg_p
ABL1	1.1272	0.473717	0.324481	0.045866	0.98218
ACD	0.42797	0.999995	2.17148e-06	0.52438	0.87237
ACTL6A	0.63881	0.999995	2.17148e-06	0.38106	0.13008
ACTR5	-0.8686	0.999995	2.17148e-06	0.81115	0.38309
ACTR8	-1.1827	0.919855	0.0362806	0.91971	0.28222
ADH5	0.072778	0.999995	2.17148e-06	0.53729	0.67278
AICDA	0.50951	0.999995	2.17148e-06	0.48769	0.95844
AKAP8	0.68987	0.832709	0.0795067	0.19107	0.85261
ALDH2	0.27201	0.999995	2.17148e-06	0.69735	0.88967
ALKBH1	0.79831	0.758896	0.119818	0.15168	0.9256
ALKBH2	0.40017	0.999995	2.17148e-06	0.61393	0.93385
ALKBH3	0.33255	0.999995	2.17148e-06	0.39987	0.78121
AMN1	-0.15856	0.999995	2.17148e-06	0.86504	0.88001
ANKRD28	-0.15725	0.999995	2.17148e-06	0.47477	0.55591
ANKRD32	0.63593	0.880972	0.0550379	0.22377	0.97169
ANKRD44	0.99093	0.331173	0.479945	0.015905	0.99581
ANKRD52	-2.2933	0.242684	0.614959	0.98802	0.031469
ANP32E	0.54061	0.899417	0.0460389	0.26973	0.97925
APAF1	0.49303	0.999995	2.17148e-06	0.53283	0.96034
APBB1	0.53196	0.999995	2.17148e-06	0.46903	0.70521
APC	0.6447	0.990179	0.00428629	0.35265	0.9623
APEX1	-0.084137	0.999995	2.17148e-06	0.8808	0.80889
APEX2	-3.98	0.03035	1.51784	0.99993	0.00029151
APITD1
APLF	0.6643	0.804151	0.0946624	0.1725	0.9774
APOBEC1	0.36223	0.900916	0.0453157	0.27458	0.73292
APOBEC2	1.0756	0.54682	0.262156	0.067112	0.85033
APOBEC3A	0.59629	0.999995	2.17148e-06	0.45025	0.97331
APOBEC3B	1.3269	0.231978	0.634553	0.0068333	0.99839
APOBEC3C	0.31306	0.990179	0.00428629	0.34641	0.87867
APOBEC3D	0.71215	0.771788	0.112502	0.15942	0.97468
APOBEC3F	0.98386	0.556259	0.254723	0.074207	0.90815
APOBEC3G	0.71748	0.791082	0.101778	0.16717	0.88629
APOBEC3H	0.86534	0.771788	0.112502	0.15832	0.84881
APTX	0.48835	0.999995	2.17148e-06	0.44657	0.37531
ARID1A	0.24925	0.999995	2.17148e-06	0.60614	0.87698
ARID1B	0.45389	0.999995	2.17148e-06	0.44076	0.9414
ARID2	0.17689	0.999995	2.17148e-06	0.6732	0.91837
ASCC1	0.29479	0.936346	0.0285636	0.29879	0.72458
ASF1A	0.26306	0.946111	0.0240579	0.3152	0.92876
ASF1B	0.60495	0.895765	0.0478059	0.25472	0.70765
ASH1L	0.18711	0.999995	2.17148e-06	0.56235	0.882
ASH2L	-0.3003	0.999995	2.17148e-06	0.38545	0.59813
ATAD5	0.21271	0.999995	2.17148e-06	0.85008	0.88801
ATF2	0.52807	0.808041	0.0925666	0.17506	0.91591
ATM	1.0267	0.473717	0.324481	0.048535	0.98543
ATMIN	-1.4182	0.242684	0.614959	0.99123	0.032091
ATR	-1.0302	0.916877	0.0376889	0.29879	0.27982
ATRIP	-1.433	0.627632	0.202295	0.9821	0.13013
ATRX	-1.9592	0.749336	0.125323	0.98265	0.18394
ATXN3	1.2957	0.452825	0.34407	0.03802	0.8221
ATXN7	0.52915	0.898198	0.0466279	0.26006	0.83402
AUNIP	-0.8943	0.796794	0.0986539	0.94088	0.21344
BABAM1	0.68891	0.894982	0.0481857	0.24102	0.94705
BAP1	-2.6092	0.121914	0.913946	0.99754	0.0097583
BARD1	-1.5556	0.505124	0.296602	0.87162	0.095957
BAZ1A	0.68859	0.946111	0.0240579	0.3149	0.9242
BAZ1B	-0.82101	0.999995	2.17148e-06	0.93694	0.40082
BCAS2	-1.3315	0.242684	0.614959	0.9911	0.032496
BCCIP	-2.1656	0.456368	0.340685	0.89972	0.083773
BCLAF1	-1.146	0.919855	0.0362806	0.7605	0.28371
BEND3	1.0686	0.54682	0.262156	0.065986	0.8722
BLM	-0.58716	0.999995	2.17148e-06	0.91731	0.5704
BMI1	0.69032	0.946111	0.0240579	0.30957	0.75566
BOD1L1	0.42126	0.895765	0.0478059	0.25245	0.65176
BPTF	-0.84766	0.999995	2.17148e-06	0.97011	0.42555
BRAP	-1.0689	0.796794	0.0986539	0.86167	0.21174
BRAT1	-0.24501	0.999995	2.17148e-06	0.52976	0.47595
BRCA1	-2.2803	0.333535	0.476859	0.54922	0.05731
BRCA2	-0.48589	0.999995	2.17148e-06	0.59971	0.36366
BRCC3	1.0318	0.601682	0.220633	0.087331	0.87405
BRD1	0.98833	0.666146	0.176431	0.1136	0.97338
BRD2	-2.2103	0.281569	0.550415	0.98825	0.041232
BRD4	-1.3075	0.627632	0.202295	0.67836	0.13115
BRD7	0.58351	0.900916	0.0453157	0.27499	0.93927
BRD8	-3.5857	0.242684	0.614959	0.98643	0.032506
BRDT	1.1979	0.473717	0.324481	0.045017	0.98678
BRE	0.59135	0.999995	2.17148e-06	0.42643	0.93967
BRIP1	-0.74063	0.999995	2.17148e-06	0.77078	0.46202
BTG2	1.7195	0.090278	1.04442	0.0013489	0.93089
BUB1B	-3.5542	0.314175	0.502828	0.9569	0.050965
C10orf12	0.97512	0.666146	0.176431	0.1114	0.97148
C11orf30	-0.003193	0.999995	2.17148e-06	0.87911	0.5957
C15orf41	-1.2402	0.796794	0.0986539	0.72513	0.21108
C17orf70	-0.15107	0.999995	2.17148e-06	0.79215	0.58451
C19orf40	0.2411	0.999995	2.17148e-06	0.68953	0.82799
C1orf115	0.94259	0.6167	0.209926	0.091886	0.76682
C1orf86	-1.0673	0.763869	0.116981	0.95479	0.19353
C20orf196	-0.48811	0.999995	2.17148e-06	0.87835	0.49671
C4orf27	0.86132	0.738793	0.131477	0.14429	0.88849
C7orf49	-0.26001	0.999995	2.17148e-06	0.55414	0.47396
C9orf142	0.8572	0.473717	0.324481	0.044019	0.98713
CAND1	2.2724	0.011243	1.94912	8.3995e-05	0.99969
CASP3	0.81112	0.736497	0.132829	0.14105	0.89782
CBX1	0.19394	0.999995	2.17148e-06	0.75643	0.6459
CBX3	-0.03894	0.999995	2.17148e-06	0.74659	0.71212
CBX4	0.59988	0.460243	0.337013	0.039295	0.98889
CBX5	0.084188	0.999995	2.17148e-06	0.84669	0.87499
CCDC101	-0.8434	0.849071	0.071056	0.94956	0.24236
CCNA1	0.42949	0.999995	2.17148e-06	0.71436	0.95031
CCNA2	-3.1293	0.074764	1.12631	0.99925	0.0037501
CCNB1	-1.6189	0.678284	0.168588	0.7545	0.15418
CCNB2	-0.083355	0.999995	2.17148e-06	0.62777	0.65176
CCNB3	1.4684	0.473717	0.324481	0.047467	0.97329
CCNC	-0.12357	0.999995	2.17148e-06	0.7097	0.71183
CCND1	-4.779	0.033249	1.47822	0.99992	0.00038045
CCND2	0.43781	0.999995	2.17148e-06	0.49635	0.94088
CCND3	-0.26809	0.999995	2.17148e-06	0.52022	0.82375
CCNE1	1.1952	0.476291	0.322128	0.049908	0.97857
CCNH	-3.6445	0.149358	0.825772	0.99632	0.014027
CCNO	0.22568	0.999995	2.17148e-06	0.52119	0.61943
CDC25A	0.68182	0.990808	0.0040105	0.3627	0.64334
CDC25B	-1.5298	0.689794	0.161281	0.97908	0.1649
CDC34	-0.1769	0.999995	2.17148e-06	0.55157	0.53232
CDC5L	-1.9318	0.678284	0.168588	0.9447	0.1503
CDC7	-3.9031	0.281569	0.550415	0.85593	0.041469
CDCA5	-2.1675	0.311117	0.507076	0.88817	0.049473
CDK1	-5.5002	0.071025	1.14859	0.99937	0.00293
CDK12	-1.335	0.326506	0.486109	0.98329	0.055057
CDK2	-1.3783	0.275343	0.560126	0.98871	0.039671
CDK4	-2.3869	0.075328	1.12304	0.99919	0.0038588
CDK7	-5.8247	0.071025	1.14859	0.99649	0.0030683
CDK8	1.6781	0.258558	0.587442	0.0088788	0.93356
CDK9	-5.0066	0.05609	1.25111	0.97713	0.0015564
CDKL5	0.80317	0.473717	0.324481	0.04722	0.98593
CDKN1A	2.426	0.010185	1.99204	5.435e-05	0.99756
CDKN1B	0.94554	0.606819	0.216941	0.088724	0.96934
CDKN2A	1.1084	0.601682	0.220633	0.086915	0.97456
CDKN2D	-0.015055	0.999995	2.17148e-06	0.62337	0.90119
CEP164	0.31003	0.999995	2.17148e-06	0.75553	0.80327
CEP57	-0.65592	0.999995	2.17148e-06	0.71041	0.33197
CEP63	0.41994	0.999995	2.17148e-06	0.43568	0.91875
CETN2	0.73186	0.550098	0.25956	0.069197	0.67505
CHAF1A	-2.5036	0.072421	1.14014	0.99933	0.0032462
CHAF1B	-3.0241	0.145295	0.837749	0.99651	0.013326
CHD1L	0.6834	0.84772	0.0717476	0.20145	0.87956
CHD3	0.50218	0.999995	2.17148e-06	0.44129	0.94326
CHD4
CHEK1	-4.1938	0.11657	0.933413	0.42976	0.0083353
CHEK2	1.3426	0.419458	0.377312	0.02881	0.91767
CHFR	-0.6704	0.999995	2.17148e-06	0.89456	0.38624
CHRAC1	0.32517	0.999995	2.17148e-06	0.83074	0.73701
CHTF18	-0.71779	0.999995	2.17148e-06	0.14798	0.47103
CIB1	1.0303	0.550098	0.25956	0.071816	0.92716
CLK2	-0.50339	0.999995	2.17148e-06	0.97237	0.59521
CLSPN	-0.74505	0.999995	2.17148e-06	0.91641	0.432
CNOT4	-0.14616	0.999995	2.17148e-06	0.94355	0.86006
CNOT7	-0.55873	0.999995	2.17148e-06	0.94797	0.56576
COL1A1	-0.82233	0.999995	2.17148e-06	0.91402	0.42073
COL21A1	0.73178	0.857307	0.0668636	0.20797	0.88833
COPS2	-1.3005	0.684566	0.164585	0.11604	0.15854
COPS3	-1.3537	0.646835	0.189206	0.90047	0.13876
COPS4	-0.91926	0.799438	0.0972152	0.78614	0.215
COPS5	-1.9335	0.119364	0.923127	0.99786	0.0086812
COPS6	-1.3013	0.810417	0.0912915	0.97701	0.2207
COPS7A	0.71646	0.407164	0.390231	0.02467	0.99321
COPS7B	0.50175	0.991828	0.00356364	0.36425	0.75713
COPS8	-0.0067786	0.999995	2.17148e-06	0.75796	0.76521
CREBBP	1.0529	0.54146	0.266434	0.064721	0.78338
CRY1	0.23498	0.946111	0.0240579	0.31105	0.81755
CRY2	-0.77769	0.999995	2.17148e-06	0.23883	0.35821
CSNK1D	-0.6951	0.919855	0.0362806	0.13041	0.28357
CSNK1E	0.85841	0.419458	0.377312	0.030352	0.99167
CSNK2A1	0.75814	0.569516	0.244494	0.078407	0.96764
CSNK2A2	0.62503	0.990179	0.00428629	0.35383	0.97299
CSNK2B	-3.1702	0.102289	0.990171	0.99866	0.0057858
CTC1	-0.4901	0.999995	2.17148e-06	0.96052	0.55291
CTCF	-2.5951	0.223938	0.649872	0.99246	0.027723
CUL1	-3.7572	0.177929	0.749753	0.73745	0.018998
CUL2	-1.5538	0.763869	0.116981	0.97844	0.1915
CUL3	2.4044	0.046875	1.32906	0.00040021	0.99984
CUL4A	0.27443	0.999995	2.17148e-06	0.71223	0.82318
CUL4B	0.90551	0.666146	0.176431	0.12015	0.84432
CUL5	0.91603	0.452825	0.34407	0.038178	0.98929
CUL7	0.13008	0.999995	2.17148e-06	0.85499	0.89518
CUL9	0.65995	0.895765	0.0478059	0.25641	0.9569
CXXC1	-0.16909	0.999995	2.17148e-06	0.92751	0.54841
CXorf57	-0.27601	0.914327	0.0388985	0.72823	0.27615
DAXX	-1.2932	0.695617	0.15763	0.88708	0.16704
DBF4	-0.94688	0.999995	2.17148e-06	0.96096	0.36276
DCAF11	0.19842	0.999995	2.17148e-06	0.43698	0.87353
DCLRE1A	-0.319	0.999995	2.17148e-06	0.85551	0.55634
DCLRE1B	-3.4027	0.108145	0.965994	0.99834	0.0069222
DCLRE1C	0.31452	0.999995	2.17148e-06	0.44392	0.73274
DCUN1D1	-0.34345	0.999995	2.17148e-06	0.78987	0.56992
DCUN1D2	0.31028	0.999995	2.17148e-06	0.59259	0.93421
DCUN1D3	0.36093	0.999995	2.17148e-06	0.63645	0.91252
DCUN1D4	0.25826	0.999995	2.17148e-06	0.56333	0.81272
DCUN1D5	-0.33218	0.999995	2.17148e-06	0.94873	0.7821
DDB1	-4.0859	0.138949	0.857145	0.79796	0.011418
DDB2
DDX1	-1.2573	0.678284	0.168588	0.49417	0.15387
DDX11	-2.2374	0.302804	0.518838	0.98403	0.046212
DICER1	-1.1718	0.689794	0.161281	0.96162	0.16323
DKC1	-4.0082	0.071025	1.14859	0.99936	0.0031078
DLGAP5	-0.56257	0.999995	2.17148e-06	0.66049	0.52181
DMC1	0.43473	0.666146	0.176431	0.11821	0.8473
DNA2	-2.7556	0.307195	0.512586	0.92212	0.04721
DNAJC2	-0.57362	0.999995	2.17148e-06	0.79926	0.41627
DNMT1	-0.57497	0.999995	2.17148e-06	0.33357	0.32616
DNTT	0.85476	0.693347	0.159049	0.12741	0.6853
DPY30	0.40026	0.999995	2.17148e-06	0.43152	0.67217
DROSHA	-1.4733	0.177929	0.749753	0.99501	0.018593
DSCC1	-2.5193	0.108145	0.965994	0.99833	0.0070803
DTX1	1.1214	0.506498	0.295422	0.05892	0.89225
DTX2	-0.94586	0.999995	2.17148e-06	0.88251	0.40581
DTX3	0.42568	0.999995	2.17148e-06	0.46652	0.92629
DTX3L	-0.094973	0.999995	2.17148e-06	0.37999	0.85763
DTX4	0.22445	0.999995	2.17148e-06	0.80848	0.86857
DUT	-6.2043	0.033249	1.47822	0.75881	0.00039033
DYNLL1	0.36074	0.999995	2.17148e-06	0.38631	0.61602
ECT2	-2.5262	0.627632	0.202295	0.64053	0.12672
EEPD1	0.85865	0.830196	0.0808194	0.18628	0.97672
EID3	0.68933	0.873125	0.0589236	0.22084	0.88359
EIF4A1	-4.0346	0.145295	0.837749	0.99637	0.013286
EME1	0.22012	0.999995	2.17148e-06	0.7148	0.65224
EME2	-0.70864	0.31227	0.50547	0.98491	0.050323
ENDOV	0.56818	0.895765	0.0478059	0.24591	0.96696
ENY2	-1.8275	0.627632	0.202295	0.76347	0.12742
EP300	2.7984	0.001157	2.93667	4.9409e-06	1
EP400
ERCC1	-0.96976	0.999995	2.17148e-06	0.97266	0.35505
ERCC2	-4.4063	0.042901	1.36753	0.99987	0.00057809
ERCC3	-2.6733	0.297388	0.526677	0.9703	0.044434
ERCC4	0.47595	0.999995	2.17148e-06	0.5355	0.79963
ERCC5	0.068274	0.999995	2.17148e-06	0.87309	0.89129
ERCC6	0.16758	0.999995	2.17148e-06	0.55167	0.84898
ERCC6L	-0.99123	0.92856	0.03219	0.35875	0.28739
ERCC6L2	0.73234	0.857307	0.0668636	0.21044	0.94245
ERCC8	-0.040553	0.999995	2.17148e-06	0.65282	0.88138
ESCO2	-1.1447	0.322501	0.491469	0.98376	0.053643
ETAA1	0.71653	0.88921	0.0509957	0.23135	0.32917
EXD2	1.0574	0.550098	0.25956	0.070107	0.93803
EXO1	0.19461	0.999995	2.17148e-06	0.86673	0.80602
EXO5	0.2008	0.999995	2.17148e-06	0.73453	0.88646
EYA1	1.0065	0.314696	0.502109	0.013098	0.99655
EYA2	0.77516	0.898198	0.0466279	0.2665	0.8201
EYA3	0.69367	0.866153	0.0624054	0.21676	0.92065
EYA4	0.60488	0.917992	0.0371611	0.28412	0.64653
EZH2	0.79077	0.895765	0.0478059	0.24969	0.78028
FAF1	-0.0802	0.999995	2.17148e-06	0.75072	0.64417
FAM122A	-0.65731	0.999995	2.17148e-06	0.95068	0.5509
FAM175A	-0.20824	0.999995	2.17148e-06	0.4178	0.43447
FAM175B	1.2529	0.316509	0.499614	0.01381	0.99635
FAM178A	-0.048783	0.999995	2.17148e-06	0.51505	0.68032
FAM35A	-0.42801	0.999995	2.17148e-06	0.8915	0.45376
FAN1	0.011404	0.999995	2.17148e-06	0.66951	0.83131
FANCA	-0.62194	0.891947	0.049661	0.97956	0.26083
FANCB	0.34079	0.999995	2.17148e-06	0.61955	0.91321
FANCC	-0.4076	0.999995	2.17148e-06	0.58536	0.43252
FANCD2	-0.52711	0.999995	2.17148e-06	0.97951	0.81361
FANCE	-0.56318	0.999995	2.17148e-06	0.73294	0.52092
FANCF	-1.2376	0.820346	0.0860029	0.97481	0.22856
FANCG	-1.2239	0.689794	0.161281	0.67072	0.16112
FANCI	-0.17343	0.999995	2.17148e-06	0.76585	0.54534
FANCL	0.035353	0.999995	2.17148e-06	0.85734	0.61374
FANCM	-0.9301	0.971192	0.0126949	0.59933	0.30266
FBXO18	0.81808	0.692143	0.159804	0.12631	0.95914
FBXO22	1.2868	0.483082	0.315979	0.055057	0.98329
FBXW7	0.79746	0.830196	0.0808194	0.18542	0.86946
FEN1	-6.6362	0.054591	1.26288	0.85355	0.00125
FIGNL1	0.25626	0.900266	0.0456292	0.27094	0.76387
FOXM1	-1.0379	0.999995	2.17148e-06	0.91617	0.34867
FOXN3	0.12078	0.999995	2.17148e-06	0.51614	0.58868
FOXO3	1.0057	0.666146	0.176431	0.11419	0.97522
FZR1	0.40024	0.999995	2.17148e-06	0.74672	0.89659
GABBR1	0.466	0.999995	2.17148e-06	0.42908	0.71614
GADD45A	0.82213	0.791551	0.101521	0.16866	0.97138
GADD45G	0.29735	0.999995	2.17148e-06	0.83719	0.76963
GAR1	-1.0073	0.796794	0.0986539	0.87814	0.2122
GEN1	0.50201	0.999995	2.17148e-06	0.41889	0.87835
GLG1	-0.76956	0.810417	0.0912915	0.31608	0.22346
GPI	-1.3781	0.159873	0.796225	0.99584	0.015697
GPS1	-2.0599	0.224636	0.648521	0.59304	0.02805
GTF2H1	-3.6146	0.142391	0.846517	0.99496	0.011853
GTF2H2
GTF2H3	-1.6993	0.228434	0.641239	0.99198	0.029255
GTF2H4	-1.4413	0.791874	0.101344	0.97832	0.2079
GTF2H5	-0.52308	0.999995	2.17148e-06	0.8949	0.50691
H2AFX	-0.054509	0.999995	2.17148e-06	0.86358	0.73136
H2AFY	0.62602	0.990267	0.00424769	0.36098	0.8818
H2AFY2	-0.17893	0.999995	2.17148e-06	0.65697	0.76417
H2AFZ	0.68029	0.655885	0.183172	0.10236	0.71083
H3F3A
H3F3B	-1.095	0.763869	0.116981	0.88388	0.19402
HDAC1	0.55345	0.895765	0.0478059	0.24806	0.6989
HDAC10	0.81533	0.550098	0.25956	0.071589	0.9426
HDAC2	0.27672	0.999995	2.17148e-06	0.52102	0.89249
HDAC3	-4.3623	0.057374	1.24128	0.99962	0.0016848
HDAC4	0.71441	0.791082	0.101778	0.16672	0.92946
HDAC9	0.58778	0.91742	0.0374318	0.28246	0.91971
HELB	-0.72129	0.999995	2.17148e-06	0.90168	0.44732
HELLS	-0.47858	0.999995	2.17148e-06	0.84881	0.47998
HELQ	-0.10804	0.999995	2.17148e-06	0.77145	0.70965
HERC2	0.23698	0.999995	2.17148e-06	0.8143	0.89932
HES1	0.46777	0.999995	2.17148e-06	0.53249	0.95177
HFM1	0.32335	0.999995	2.17148e-06	0.53142	0.86835
HINFP	-5.6757	0.108145	0.965994	0.99726	0.0073867
HIPK1	0.90714	0.6167	0.209926	0.092143	0.82826
HIPK2	0.61977	0.832176	0.0797848	0.18828	0.91577
HLTF	1.65	0.098669	1.00582	0.0016848	0.99962
HMGA1	0.29452	0.999995	2.17148e-06	0.4665	0.69188
HMGA2	-0.44659	0.999995	2.17148e-06	0.83668	0.55145
HMGB1
HMGB2	-0.52737	0.999995	2.17148e-06	0.20691	0.46862
HMGN1	1.2289	0.7121	0.147459	0.13452	0.86698
HNRNPK	-4.6998	0.054591	1.26288	0.99268	0.0012995
HNRNPUL1	0.23744	0.999995	2.17148e-06	0.48498	0.80772
HNRNPUL2	-0.27994	0.999995	2.17148e-06	0.93773	0.87162
HPRT1	0.69617	0.776472	0.109874	0.16159	0.9528
HUS1	-1.9735	0.11657	0.933413	0.99795	0.0082464
HUS1B	1.102	0.524116	0.280573	0.061529	0.68604
HUWE1	-3.2949	0.071025	1.14859	0.9994	0.0028509
ID3	0.17683	0.999995	2.17148e-06	0.77905	0.74649
IGHMBP2	-0.30198	0.999995	2.17148e-06	0.935	0.68444
ING4	0.41239	0.666146	0.176431	0.12009	0.89548
INO80	-0.50187	0.999995	2.17148e-06	0.84898	0.48096
INO80B	-0.60325	0.999995	2.17148e-06	0.63998	0.49117
INO80C	1.044	0.550098	0.25956	0.072211	0.80295
INO80D	0.32765	0.895765	0.0478059	0.25585	0.68105
INO80E	-0.031307	0.999995	2.17148e-06	0.70582	0.75998
IP6K3	0.18385	0.999995	2.17148e-06	0.74568	0.69159
KAT2A	-0.14195	0.999995	2.17148e-06	0.88465	0.60239
KAT2B	1.1195	0.370471	0.431246	0.018187	0.99514
KAT5	-0.43103	0.999995	2.17148e-06	0.86477	0.58501
KAT8	-6.4108	0.144188	0.841071	0.99103	0.012772
KDM1A	-0.28106	0.999995	2.17148e-06	0.61348	0.48474
KDM2A	0.68501	0.655885	0.183172	0.1043	0.84565
KDM4A	0.45193	0.908166	0.0418348	0.27817	0.90096
KDM4D	-0.8759	0.999995	2.17148e-06	0.61691	0.37952
KDM5A	0.14757	0.999995	2.17148e-06	0.69858	0.80433
KEAP1	3.1931	0.001157	2.93667	4.9409e-06	1
KIAA1586	0.79883	0.666146	0.176431	0.10811	0.95528
KLHL15	1.6834	0.16886	0.772473	0.003424	0.6579
KMT2A	-4.9551	0.020833	1.68125	0.99997	0.00012352
L3MBTL1	0.59594	0.999995	2.17148e-06	0.38773	0.92928
LATS1	1.3882	0.231978	0.634553	0.006853	0.84319
LATS2	2.6753	0.001157	2.93667	4.9409e-06	0.99991
LIG1	0.61665	0.968689	0.0138156	0.33186	0.68065
LIG3	0.26115	0.88921	0.0509957	0.23209	0.79404
LIG4	-0.54613	0.999995	2.17148e-06	0.9596	0.56224
LMNA	-0.36729	0.999995	2.17148e-06	0.89359	0.46922
Luciferase
MAD2L2	-1.7472	0.689794	0.161281	0.97537	0.16288
MAPK14	-0.15755	0.999995	2.17148e-06	0.49818	0.50375
MAPK8	0.95247	0.666146	0.176431	0.11456	0.97986
MAPKAPK2	0.80503	0.6167	0.209926	0.090918	0.95649
MARK3	-1.502	0.496765	0.303849	0.97285	0.093309
MASTL	-3.5968	0.145295	0.837749	0.94771	0.013336
MAU2	-1.1266	0.770728	0.113099	0.082795	0.19823
MB21D1	0.024101	0.999995	2.17148e-06	0.82757	0.80053
MBD4	0.52013	0.999995	2.17148e-06	0.39893	0.77812
MBTD1	-1.2678	0.610542	0.214284	0.75589	0.12185
MCM10	-2.7018	0.120434	0.919251	0.9976	0.0093828
MCM2	-3.9026	0.153344	0.814333	0.75529	0.014729
MCM3	-1.8244	0.672335	0.172414	0.97647	0.1471
MCM3AP	-0.61686	0.3533	0.451856	0.81054	0.06146
MCM4	-2.6582	0.074764	1.12631	0.99929	0.0036118
MCM5	-3.3128	0.242684	0.614959	0.9906	0.033929
MCM6	-2.7955	0.203157	0.692168	0.99344	0.02385
MCM7	-2.268	0.525005	0.279837	0.41385	0.10169
MCM8	-0.039539	0.999995	2.17148e-06	0.83326	0.74815
MCM9	-1.0851	0.832372	0.0796825	0.48543	0.23484
MCPH1	-2.0866	0.464586	0.332934	0.63379	0.086273
MCRS1	-1.1302	0.999995	2.17148e-06	0.97614	0.32405
MDC1	-0.56101	0.999995	2.17148e-06	0.90308	0.44821
MDM2	-4.3195	0.242684	0.614959	0.99035	0.032901
MDM4	-4.5806	0.144188	0.841071	0.98798	0.012654
MEN1	-2.3775	0.119364	0.923127	0.99783	0.0087899
METTL3	-1.2212	0.916877	0.0376889	0.8818	0.27986
MGMT	-0.14265	0.999995	2.17148e-06	0.9156	0.8765
MLH1	0.8558	0.895765	0.0478059	0.24884	0.80466
MLH3	1.3905	0.084491	1.07319	0.001003	0.99979
MMS19	-1.2955	0.849071	0.071056	0.95756	0.24285
MMS22L	-1.2675	0.365404	0.437227	0.97418	0.064345
MNAT1	-2.2534	0.302263	0.519615	0.98648	0.045807
MORF4L1	0.42908	0.999995	2.17148e-06	0.54389	0.17651
MORF4L2	0.63417	0.999995	2.17148e-06	0.39038	0.94664
MPG	-0.25967	0.999995	2.17148e-06	0.77776	0.86367
MPLKIP	-0.72749	0.911937	0.0400352	0.97578	0.26959
MPZ	0.68224	0.820563	0.0858881	0.18128	0.91509
MRE11A	-0.61382	0.866766	0.0620981	0.099535	0.25069
MSH2	0.58967	0.898198	0.0466279	0.26432	0.8587
MSH3	0.68921	0.866153	0.0624054	0.21549	0.9651
MSH4	0.57112	0.936708	0.0283958	0.30091	0.91268
MSH5	-0.28314	0.999995	2.17148e-06	0.63355	0.60667
MSH6	0.40301	0.999995	2.17148e-06	0.38861	0.89837
MTA1	-0.19476	0.999995	2.17148e-06	0.38893	0.82601
MTA2	-0.49783	0.999995	2.17148e-06	0.83241	0.47743
MTA3	0.22494	0.999995	2.17148e-06	0.56075	0.85118
MTOR	-5.7026	0.042901	1.36753	0.99982	0.00068679
MUM1	0.4607	0.928623	0.0321606	0.29434	0.86393
MUS81	-0.45934	0.999995	2.17148e-06	0.79515	0.48975
MUTYH	-0.50623	0.999995	2.17148e-06	0.63173	0.44237
MVP	0.81472	0.758896	0.119818	0.15344	0.68966
MYBBP1A	-2.7781	0.472037	0.326024	0.6854	0.088161
NABP1	0.48255	0.990179	0.00428629	0.34946	0.87933
NABP2	-0.54447	0.999995	2.17148e-06	0.6682	0.80112
NAE1	-1.7858	0.750862	0.12444	0.86218	0.18511
NBN	0.4793	0.999995	2.17148e-06	0.56638	0.81496
NCAPD2	-4.3115	0.054591	1.26288	0.99975	0.0012105
NCAPD3	-0.40086	0.999995	2.17148e-06	0.13242	0.44871
NCAPG	-5.7956	0.054591	1.26288	0.97932	0.0013093
NCAPG2	-4.2455	0.074764	1.12631	0.99928	0.0036612
NCAPH	-1.7639	0.328121	0.483966	0.98308	0.055679
NCAPH2	-2.7451	0.144188	0.841071	0.99672	0.012367
NDNL2	-2.7716	0.15205	0.818014	0.9962	0.014442
NEDD8	-2.3191	0.678284	0.168588	0.72723	0.15139
NEIL1	-0.67307	0.618868	0.208402	0.96371	0.12417
NEIL2	0.34385	0.999995	2.17148e-06	0.54281	0.88869
NEIL3	0.82489	0.452825	0.34407	0.036746	0.98965
NEK1	-1.2878	0.911938	0.0400347	0.76968	0.27203
NEK11	0.50936	0.999995	2.17148e-06	0.43322	0.92803
NEK6	0.39034	0.791082	0.101778	0.16712	0.88394
NEK8	1.4484	0.322674	0.491236	0.014808	0.98825
NEK9	0.80949	0.473717	0.324481	0.045807	0.98648
NELFB	-3.0014	0.177929	0.749753	0.99495	0.018909
NFATC2IP	-0.54964	0.967911	0.0141646	0.95858	0.3006
NFE2L2	0.67638	0.990179	0.00428629	0.34384	0.74225
NFRKB	-0.20437	0.999995	2.17148e-06	0.26745	0.66886
NHEJ1	-0.70523	0.892374	0.0494531	0.96991	0.2619
NHP2	-3.0122	0.054591	1.26288	0.99971	0.0013489
NIPBL	-0.16247	0.999995	2.17148e-06	0.45988	0.80268
NLK	0.3934	0.999995	2.17148e-06	0.58353	0.90377
NONO	-4.106	0.088796	1.05161	0.99899	0.0047383
NOP10	-0.69185	0.911938	0.0400347	0.35718	0.27348
NOTCH1	0.51046	0.898198	0.0466279	0.26205	0.91894
NOTCH2	0.5725	0.999995	2.17148e-06	0.44843	0.83309
NOTCH3	1.0562	0.586125	0.23201	0.081945	0.93452
NOTCH4	0.76332	0.483082	0.315979	0.054147	0.97878
NPM1
NSMCE1	-3.4892	0.082483	1.08364	0.99912	0.0043134
NSMCE2	-2.6884	0.275343	0.560126	0.57098	0.039433
NSMCE4A	-2.083	0.375998	0.424814	0.9278	0.067014
NTHL1	-1.1482	0.689794	0.161281	0.94556	0.16424
NUDT1	0.46934	0.999995	2.17148e-06	0.60251	0.95623
NUDT16L1	-0.7658	0.867153	0.0619043	0.77676	0.25172
OBFC1	-0.18735	0.999995	2.17148e-06	0.59517	0.50483
OGG1	1.1362	0.655885	0.183172	0.10302	0.631
OPRM1	1.1102	0.595551	0.225081	0.084534	0.9136
OR10A7	1.0244	0.3222	0.491874	0.014442	0.9962
OR10AD1	0.68607	0.962538	0.0165821	0.32461	0.73744
OR10G2	0.36497	0.857307	0.0668636	0.21004	0.59841
OR10H3	0.95489	0.474847	0.323446	0.049157	0.9458
OR10H5	1.361	0.0901	1.04528	0.00125	0.99974
OR10Q1	0.087051	0.999995	2.17148e-06	0.53827	0.60521
OR10R2	0.75978	0.419458	0.377312	0.029769	0.99178
OR10S1	1.4158	0.231978	0.634553	0.0067345	0.93478
OR10T2	0.74405	0.452825	0.34407	0.036212	0.98977
OR10V1	0.36403	0.999995	2.17148e-06	0.78898	0.77386
OR10Z1	0.71339	0.666146	0.176431	0.11951	0.94653
OR11H1
OR11H6	0.80189	0.840779	0.0753181	0.19455	0.96385
OR13A1	0.85632	0.791551	0.101521	0.16895	0.97647
OR13C2
OR13C4	1.0109	0.473717	0.324481	0.048396	0.9855
OR13J1	0.78008	0.84772	0.0717476	0.20028	0.95778
OR1A2	0.78299	0.866153	0.0624054	0.21816	0.96274
OR1D5	-0.41707	0.999995	2.17148e-06	0.94967	0.57237
OR1E1	0.87386	0.840779	0.0753181	0.19472	0.98139
OR1E2	0.94648	0.830196	0.0808194	0.18695	0.65405
OR1F1	-0.41793	0.999995	2.17148e-06	0.77169	0.74749
OR1I1	0.076749	0.71689	0.144547	0.13619	0.75468
OR1L4	1.3328	0.129902	0.886384	0.0023568	0.99949
OR1L6	-1.0708	0.999995	2.17148e-06	0.59986	0.3149
OR1N1	1.08	0.452825	0.34407	0.03724	0.98952
OR2B11	0.74299	0.739407	0.131116	0.1452	0.90612
OR2F2	0.51308	0.990179	0.00428629	0.35082	0.8845
OR2L13	1.2315	0.251344	0.599731	0.0083155	0.99791
OR2L2	1.2561	0.432251	0.364264	0.032753	0.9875
OR2T10	0.82606	0.832709	0.0795067	0.19065	0.94617
OR2T29
OR2T35
OR2V2	0.58999	0.891563	0.049848	0.23756	0.96809
OR4A47	-0.23832	0.999995	2.17148e-06	0.57428	0.58147
OR4A5	0.55982	0.990179	0.00428629	0.3537	0.72089
OR4B1	-0.52255	0.999995	2.17148e-06	0.73249	0.38927
OR4C11	1.1052	0.569516	0.244494	0.077933	0.89375
OR4C45
OR4C46	-0.60095	0.999995	2.17148e-06	0.80457	0.52226
OR4D1	0.21256	0.999995	2.17148e-06	0.50624	0.68549
OR4D5	0.49486	0.946311	0.0239661	0.31813	0.90938
OR4D6	-0.11383	0.999995	2.17148e-06	0.8321	0.79322
OR4F15	1.1206	0.231978	0.634553	0.0062898	0.99855
OR4F21
OR4F6	0.98941	0.750423	0.124694	0.14896	0.82936
OR4K1	1.0802	0.405748	0.391744	0.022951	0.99374
OR4K14	1.6861	0.210648	0.676443	0.004936	0.99643
OR4K17	1.1476	0.5724	0.2423	0.079415	0.9737
OR4L1	1.1577	0.473717	0.324481	0.046746	0.86421
OR4N5	1.0414	0.240278	0.619286	0.0075448	0.99822
OR4P4	1.1664	0.427447	0.369118	0.031933	0.99127
OR51B4	1.0439	0.210648	0.676443	0.0049458	0.99895
OR51F1	0.71206	0.898198	0.0466279	0.26351	0.73781
OR51G2	0.73881	0.895765	0.0478059	0.25281	0.95558
OR51I1	0.69008	0.891563	0.049848	0.23714	0.75133
OR51I2	-0.057494	0.999995	2.17148e-06	0.63699	0.38432
OR51M1	0.25113	0.999995	2.17148e-06	0.55366	0.66449
OR52A5	0.5341	0.857307	0.0668636	0.21031	0.85807
OR52B2	0.51872	0.999995	2.17148e-06	0.38637	0.61537
OR52B4	0.52758	0.946111	0.0240579	0.31354	0.59351
OR52B6	0.97668	0.623358	0.205262	0.093803	0.90477
OR52H1	0.3192	0.999995	2.17148e-06	0.51027	0.94316
OR52I1	1.1651	0.666146	0.176431	0.11699	0.9334
OR52K1	1.7295	0.231978	0.634553	0.0069321	0.94401
OR52L1	0.012397	0.999995	2.17148e-06	0.5097	0.79047
OR52M1	1.0795	0.666146	0.176431	0.11265	0.92212
OR52N5	1.1901	0.473717	0.324481	0.043426	0.98734
OR52R1	0.4646	0.999995	2.17148e-06	0.4845	0.8599
OR56A1	0.65103	0.476291	0.322128	0.050323	0.98491
OR56A3	0.87768	0.419458	0.377312	0.028761	0.99205
OR56B1	0.26624	0.999995	2.17148e-06	0.49342	0.7487
OR5A2	0.69498	0.832709	0.0795067	0.19039	0.76795
OR5AK2	0.69428	0.887204	0.0519765	0.2263	0.91434
OR5AN1	0.44954	0.999995	2.17148e-06	0.58243	0.935
OR5AP2	0.40846	0.999995	2.17148e-06	0.37297	0.59279
OR5AR1	0.74232	0.830196	0.0808194	0.18668	0.9057
OR5B3	1.0667	0.738106	0.131881	0.14258	0.4546
OR5F1	0.50413	0.999995	2.17148e-06	0.43058	0.78619
OR5L1	0.58397	0.866153	0.0624054	0.21733	0.85212
OR5L2	0.99985	0.473717	0.324481	0.04304	0.82401
OR5M10
OR5M9	0.98596	0.473717	0.324481	0.042032	0.98798
OR5R1	1.2212	0.449396	0.347371	0.034532	0.9904
OR5T1	1.8346	0.0643	1.19179	0.00061761	0.99986
OR6B1	0.8476	0.857307	0.0668636	0.2059	0.79298
OR6B2	0.94665	0.473717	0.324481	0.047843	0.98132
OR6C4	1.0293	0.658796	0.181249	0.10546	0.8131
OR6C6	0.9167	0.403579	0.394071	0.021804	0.9941
OR6C68	0.65576	0.473717	0.324481	0.046845	0.9861
OR6C74	1.2106	0.452825	0.34407	0.036508	0.98969
OR6K2	0.81365	0.894982	0.0481857	0.24165	0.94829
OR6K3	0.24299	0.999995	2.17148e-06	0.39409	0.84806
OR6K6	0.26699	0.999995	2.17148e-06	0.41133	0.63339
OR6N2	0.70183	0.473717	0.324481	0.042457	0.98775
OR6V1	1.3501	0.409084	0.388188	0.025322	0.85525
OR6X1	-0.48061	0.999995	2.17148e-06	0.64981	0.47547
OR7A5	1.1009	0.550098	0.25956	0.07149	0.86348
OR7D4	0.95597	0.640812	0.193269	0.097114	0.95503
OR7G3	0.84125	0.84772	0.0717476	0.19936	0.86702
OR8B3
OR8B8	0.26528	0.999995	2.17148e-06	0.87978	0.73249
OR8D2	1.0392	0.240278	0.619286	0.007693	0.99816
OR8G1
OR8G2
OR8G5	1.0618	0.641879	0.192547	0.09822	0.8397
OR8J3	0.47151	0.999995	2.17148e-06	0.37042	0.93533
OR8K3	1.3596	0.094753	1.02341	0.0015169	0.99968
OR8U1	0.40598	0.999995	2.17148e-06	0.60213	0.96785
OR9G1	0.3066	0.999995	2.17148e-06	0.53973	0.76989
OR9I1	0.89546	0.316509	0.499614	0.013849	0.99634
ORC2	-1.601	0.756924	0.120948	0.94565	0.18741
OTUB1	-1.7753	0.514406	0.288694	0.96114	0.09827
OTUB2	0.83914	0.88921	0.0509957	0.23213	0.92914
OTUD7B	0.76523	0.895765	0.0478059	0.24775	0.94339
PAGR1	0.65361	0.866153	0.0624054	0.21637	0.7989
PAK1	0.78112	0.758896	0.119818	0.15255	0.89894
PALB2	-1.0369	0.999194	0.000350182	0.8299	0.31245
PAPD7	-1.0054	0.30754	0.512098	0.98581	0.047596
PARG
PARK2	0.84712	0.483082	0.315979	0.053485	0.98381
PARK7	0.46133	0.999995	2.17148e-06	0.4835	0.93998
PARP1	-0.53515	0.999995	2.17148e-06	0.89206	0.58852
PARP14	0.6547	0.990179	0.00428629	0.35631	0.85064
PARP15	0.5687	0.88921	0.0509957	0.23009	0.92153
PARP2	0.65675	0.990179	0.00428629	0.35668	0.81129
PARP3	0.20284	0.999995	2.17148e-06	0.5286	0.89912
PARP4	0.20111	0.999995	2.17148e-06	0.80098	0.89409
PARP9	1.1254	0.550098	0.25956	0.069237	0.97821
PARPBP	0.85729	0.419458	0.377312	0.030441	0.99165
PAXIP1	1.1774	0.373488	0.427723	0.019433	0.99473
PBRM1	-0.46286	0.999995	2.17148e-06	0.88869	0.54191
PCID2	-3.3509	0.389409	0.409594	0.95659	0.070235
PCNA	-4.111	0.03035	1.51784	0.99993	0.00028163
PDS5A	-1.0836	0.776075	0.110096	0.94234	0.20044
PDS5B	-0.31916	0.999995	2.17148e-06	0.95675	0.74555
PER1	0.10629	0.999995	2.17148e-06	0.69955	0.78312
PER2	0.94756	0.666146	0.176431	0.11469	0.93478
PER3	0.42568	0.999995	2.17148e-06	0.41004	0.87611
PGBD5	1.4842	0.403579	0.394071	0.022397	0.91533
PHF11	0.31291	0.666146	0.176431	0.11205	0.93485
PHF3	1.2252	0.417957	0.378868	0.026992	0.99069
PHIP	0.85976	0.666146	0.176431	0.11225	0.92959
PIAS1	0.19107	0.999995	2.17148e-06	0.72657	0.91209
PIAS2	1.0417	0.666146	0.176431	0.11935	0.82721
PIAS3	0.7268	0.922458	0.0350534	0.29042	0.87771
PIAS4	0.81113	0.895765	0.0478059	0.25241	0.97387
PIF1	0.13987	0.999995	2.17148e-06	0.64182	0.87016
PIN1	0.69549	0.805808	0.0937684	0.17372	0.95579
PINK1	-0.25529	0.999995	2.17148e-06	0.9049	0.87309
PINX1
PLK1	-3.4919	0.177929	0.749753	0.99481	0.019284
PLRG1	-2.8595	0.322501	0.491469	0.3009	0.053693
PML	1.2222	0.483082	0.315979	0.055086	0.74991
PMP22	0.92438	0.419458	0.377312	0.028642	0.99209
PMS1	0.81809	0.693347	0.159049	0.12801	0.94274
PMS2	0.43293	0.999995	2.17148e-06	0.44479	0.6009
PNKP	-1.6149	0.525005	0.279837	0.9653	0.10198
PNN	-2.9885	0.074764	1.12631	0.99927	0.0036909
POLA1	-0.7643	0.999995	2.17148e-06	0.87752	0.33614
POLB	0.35874	0.999995	2.17148e-06	0.37381	0.89613
POLD1	0.0045422	0.988983	0.00481117	0.34197	0.50786
POLD2	-4.2014	0.177929	0.749753	0.99104	0.019097
POLD3	-3.1366	0.177929	0.749753	0.96428	0.019749
POLD4	-0.067239	0.999995	2.17148e-06	0.36519	0.83775
POLE	-2.9761	0.242684	0.614959	0.98968	0.032872
POLE2	-5.812	0.020833	1.68125	0.99997	0.0001334
POLE3	-2.2107	0.207217	0.683575	0.99319	0.024769
POLE4	-0.90329	0.763869	0.116981	0.70786	0.19024
POLG	0.14793	0.990179	0.00428629	0.35171	0.73166
POLG2	-1.0683	0.810417	0.0912915	0.98262	0.22156
POLH	-0.65708	0.999995	2.17148e-06	0.4095	0.47946
POLI	0.068728	0.999995	2.17148e-06	0.45804	0.4738
POLK	1.2002	0.407164	0.390231	0.024769	0.99319
POLL	0.048953	0.999995	2.17148e-06	0.76713	0.60124
POLM	0.37894	0.815244	0.0887124	0.17836	0.6709
POLN	0.51687	0.999995	2.17148e-06	0.57678	0.97358
POLQ	-2.4858	0.357978	0.446144	0.97544	0.062656
POLR2A	-1.2518	0.810417	0.0912915	0.70766	0.22114
POLR2B	-5.8573	0.0625	1.20412	0.9726	0.0020011
POLR2C	-3.7203	0.054591	1.26288	0.9997	0.0013983
POLR2D	-5.5901	0.042901	1.36753	0.99979	0.0006769
POLR2E	-3.7589	0.108052	0.966367	0.99853	0.0063787
POLR2F	-4.849	0.071025	1.14859	0.9985	0.0027224
POLR2G	-3.6225	0.068764	1.16264	0.99948	0.0024952
POLR2H	-4.9853	0.023148	1.63549	0.99995	0.00017293
POLR2I	-1.8049	0.521116	0.283066	0.97904	0.10011
POLR2J	-1.6393	0.591007	0.228407	0.93385	0.11606
POLR2K
POLR2L	-6.4577	0.013889	1.85733	1	4.4468e-05
POT1	-3.6023	0.057374	1.24128	0.99962	0.0017145
PPM1D	-2.6789	0.102452	0.98948	0.99864	0.0059044
PPM1G	-0.54467	0.999995	2.17148e-06	0.91191	0.57479
PPP4C	-3.4232	0.112749	0.947887	0.99807	0.0078215
PPP4R1	-0.87919	0.810417	0.0912915	0.97105	0.22483
PPP4R2	0.044036	0.999995	2.17148e-06	0.48803	0.51181
PPP4R4	0.61482	0.692143	0.159804	0.126	0.96457
PPP5C	0.39969	0.943085	0.0254492	0.3045	0.93025
PPP6C	-3.7262	0.042901	1.36753	0.99987	0.00060773
PPP6R1	0.36263	0.999995	2.17148e-06	0.41758	0.62386
PPP6R2	0.59675	0.999995	2.17148e-06	0.42216	0.93773
PPP6R3	1.2057	0.37303	0.428256	0.018711	0.99499
PRDM10	-1.0006	0.810417	0.0912915	0.36144	0.22306
PRDM9	1.2858	0.262888	0.580229	0.010381	0.996
PRIMPOL	0.7533	0.895765	0.0478059	0.25812	0.93311
PRKCG	0.54726	0.999995	2.17148e-06	0.36963	0.96845
PRKDC
PRMT1	-5.3556	0.054591	1.26288	0.99971	0.0013686
PRMT6	0.54596	0.918761	0.0367974	0.28828	0.98077
PRMT8	0.49857	0.999995	2.17148e-06	0.37426	0.93732
PRPF19	-4.4801	0.108145	0.965994	0.99787	0.0072088
PSIP1	0.62921	0.999995	2.17148e-06	0.43268	0.98084
PSMD14	-3.8897	0.184888	0.733091	0.81844	0.021488
PSME3	-1.3206	0.681434	0.166576	0.9777	0.15686
PTEN	1.4013	0.262888	0.580229	0.0097583	0.99754
PTPN2	0.94986	0.666146	0.176431	0.1183	0.65082
PXMP2	0.048379	0.999995	2.17148e-06	0.39495	0.74202
RAD1	-1.6736	0.786523	0.104289	0.96385	0.20398
RAD17	-2.2259	0.627632	0.202295	0.63025	0.12898
RAD18	0.56268	0.999995	2.17148e-06	0.43724	0.86477
RAD21	-1.1172	0.999995	2.17148e-06	0.77503	0.332
RAD23A	0.8145	0.758896	0.119818	0.15469	0.95161
RAD23B	-0.39528	0.999995	2.17148e-06	0.82192	0.84146
RAD50	-1.2428	0.916877	0.0376889	0.63189	0.27975
RAD51	-3.4697	0.30754	0.512098	0.98556	0.048248
RAD51AP1	0.56331	0.999995	2.17148e-06	0.49856	0.81696
RAD51B	-1.4376	0.242684	0.614959	0.99078	0.033376
RAD51C	-1.5615	0.804842	0.0942894	0.82859	0.21732
RAD51D	-3.218	0.176264	0.753836	0.99515	0.018059
RAD52	-0.045822	0.999995	2.17148e-06	0.74095	0.7596
RAD54B	0.30753	0.999995	2.17148e-06	0.51796	0.74756
RAD54L	0.29703	0.999995	2.17148e-06	0.6225	0.95699
RAD54L2	0.63871	0.891563	0.049848	0.2385	0.93938
RAD9A	-1.9744	0.664774	0.177326	0.94631	0.14402
RAD9B	1.0812	0.56397	0.248744	0.075838	0.96861
RAG1	0.44244	0.990179	0.00428629	0.35577	0.92446
RAG2	0.35578	0.999995	2.17148e-06	0.56905	0.91347
RAP1A	0.94031	0.505101	0.296622	0.058219	0.98231
RASSF7	-0.66074	0.873609	0.0586829	0.86194	0.25453
RBBP7	-0.92302	0.788878	0.10299	0.94042	0.20543
RBBP8	-0.5135	0.999995	2.17148e-06	0.97187	0.60766
RBM7	-0.60679	0.999995	2.17148e-06	0.94834	0.60201
RBX1	-1.8179	0.207217	0.683575	0.93165	0.024571
RECQL	0.7574	0.812931	0.0899463	0.17699	0.825
RECQL4
RECQL5	0.0073444	0.999995	2.17148e-06	0.81149	0.89856
REV1	0.28551	0.999995	2.17148e-06	0.40183	0.34303
REV3L	-1.5488	0.763869	0.116981	0.97925	0.19204
RFC1	-0.60543	0.999995	2.17148e-06	0.38463	0.59049
RFC2	-3.1574	0.253963	0.59523	0.8587	0.035777
RFC3	-2.0869	0.184888	0.733091	0.9942	0.021478
RFC4	-0.64172	0.911937	0.0400352	0.85763	0.26898
RFC5	-3.1047	0.05609	1.25111	0.99965	0.0015465
RFWD3	-1.5869	0.325814	0.48703	0.98344	0.054592
RHNO1	0.36928	0.899417	0.0460389	0.26912	0.90959
RHO	0.41723	0.999995	2.17148e-06	0.54766	0.9702
RIF1	-0.64878	0.999995	2.17148e-06	0.51953	0.46244
RING1	1.0019	0.736497	0.132829	0.14148	0.96589
RINN1
RMI1	-1.6314	0.632616	0.19886	0.88514	0.1344
RMI2	-0.098779	0.999995	2.17148e-06	0.90247	0.8235
RNASEH2A	-1.8733	0.242684	0.614959	0.99128	0.031864
RNF10	-0.0029524	0.999995	2.17148e-06	0.31705	0.58806
RNF111	1.6966	0.084491	1.07319	0.0010821	0.99977
RNF113A	-1.3012	0.678284	0.168588	0.67521	0.15129
RNF113B	0.73071	0.88921	0.0509957	0.2325	0.98062
RNF126	0.82779	0.866153	0.0624054	0.2157	0.96952
RNF138	0.74848	0.473717	0.324481	0.047823	0.98576
RNF146	1.4151	0.262888	0.580229	0.010203	0.98106
RNF165	0.53893	0.999995	2.17148e-06	0.45982	0.77558
RNF168	0.050112	0.999995	2.17148e-06	0.908	0.79779
RNF169	-0.19874	0.999995	2.17148e-06	0.84408	0.75099
RNF17	0.33977	0.999995	2.17148e-06	0.55002	0.89108
RNF2	-0.53652	0.999995	2.17148e-06	0.97659	0.60611
RNF20	-1.4254	0.790079	0.102329	0.94223	0.20658
RNF4	-1.0113	0.733645	0.134514	0.89097	0.1793
RNF40	-1.7556	0.184888	0.733091	0.99418	0.021498
RNF7	-1.084	0.999995	2.17148e-06	0.95381	0.35553
RNF8	-1.4774	0.627632	0.202295	0.80679	0.13196
RPA1	-4.4845	0.091776	1.03727	0.64534	0.0049953
RPA2	-3.714	0.177929	0.749753	0.99159	0.01967
RPA3	-4.7606	0.176264	0.753836	0.47553	0.01799
RPA4	0.56551	0.857307	0.0668636	0.20507	0.89701
RPAIN	-1.5311	0.860134	0.0654339	0.95211	0.24785
RPS27L	-0.96534	0.464007	0.333475	0.96455	0.08567
RRM1	-7.0698	0.013889	1.85733	0.99999	4.4468e-05
RRM2	-1.1875	0.34165	0.466419	0.10394	0.059069
RRM2B	1.1627	0.403579	0.394071	0.022358	0.99394
RTEL1	-4.1977	0.108145	0.965994	0.96687	0.0068728
RTF1	-0.72953	0.999995	2.17148e-06	0.9718	0.49026
RTFDC1	-0.35945	0.999995	2.17148e-06	0.72246	0.54419
RUVBL1	-6.4347	0.013889	1.85733	1	3.4586e-05
RUVBL2	-4.2512	0.066358	1.17811	0.9995	0.002337
SAE1	-2.1105	0.666235	0.176373	0.80892	0.14505
SALL4	-0.16727	0.999995	2.17148e-06	0.49789	0.88483
SAMHD1	-0.17695	0.999995	2.17148e-06	0.93119	0.79117
SCAF11	-0.079	0.999995	2.17148e-06	0.2924	0.70872
SCAF4	0.58947	0.999995	2.17148e-06	0.43011	0.92848
SCAF8	0.93669	0.483082	0.315979	0.055165	0.98321
SCAI	0.25853	0.999995	2.17148e-06	0.52308	0.92123
SENP2	-0.15252	0.999995	2.17148e-06	0.69425	0.82531
SENP6	-1.4435	0.632616	0.19886	0.62658	0.13503
SENP7	-0.044818	0.999995	2.17148e-06	0.82965	0.54611
SENP8	1.3965	0.231978	0.634553	0.0062898	0.9977
SERBP1	0.12684	0.999995	2.17148e-06	0.49267	0.40697
SET	-0.57306	0.999995	2.17148e-06	0.84758	0.51714
SETD2	-1.3829	0.30754	0.512098	0.98569	0.047991
SETD8	-1.9066	0.579716	0.236785	0.97202	0.11322
SETDB1	0.31692	0.999995	2.17148e-06	0.48212	0.9086
SETMAR	0.18537	0.999995	2.17148e-06	0.58176	0.7277
SETX	0.21214	0.999995	2.17148e-06	0.62231	0.78538
SF3B1	-5.5862	0.054591	1.26288	0.9998	0.00094371
SFPQ	-0.10643	0.999995	2.17148e-06	0.61203	0.35449
SFR1	-0.091467	0.999995	2.17148e-06	0.93329	0.86882
SHFM1	-1.0693	0.849071	0.071056	0.97086	0.24147
SHPRH	1.2444	0.327125	0.485286	0.015361	0.9959
SIN3A	-1.3162	0.820346	0.0860029	0.95844	0.22938
SIRT1	0.89603	0.417957	0.378868	0.026844	0.83159
SIRT2	-0.11471	0.999995	2.17148e-06	0.88551	0.86143
SIRT3	-0.34853	0.999995	2.17148e-06	0.92199	0.8191
SIRT4	0.43751	0.999995	2.17148e-06	0.46948	0.75545
SIRT5	-0.41573	0.999995	2.17148e-06	0.3499	0.65566
SIRT6	-0.2281	0.999995	2.17148e-06	0.74881	0.53733
SIRT7	-0.37233	0.999995	2.17148e-06	0.84037	0.55686
SKIV2L2	-2.7272	0.505124	0.296602	0.75054	0.095611
SKP1	-3.6231	0.281569	0.550415	0.98417	0.041232
SLBP	-1.1941	0.832372	0.0796825	0.97722	0.23541
SLFN11	0.32716	0.968393	0.0139484	0.32773	0.86651
SLX1A
SLX4	-1.7897	0.678284	0.168588	0.85593	0.15491
SLX4IP	-0.082658	0.999995	2.17148e-06	0.66906	0.8524
SMARCA2	1.0859	0.641879	0.192547	0.098645	0.97976
SMARCA4	0.72655	0.738793	0.131477	0.14393	0.93694
SMARCA5	-1.3373	0.627632	0.202295	0.95764	0.13056
SMARCAD1	1.0454	0.698228	0.156003	0.13033	0.89589
SMARCAL1	0.59662	0.918761	0.0367974	0.28781	0.84598
SMARCB1	-0.55775	0.999995	2.17148e-06	0.90745	0.43848
SMARCC2	0.53817	0.895765	0.0478059	0.25735	0.64484
SMARCD1	0.1881	0.999995	2.17148e-06	0.49734	0.74797
SMARCE1	0.128	0.895765	0.0478059	0.24392	0.68128
SMC1A	-3.73	0.071025	1.14859	0.97635	0.0029892
SMC1B	1.2439	0.297636	0.526315	0.012071	0.99678
SMC2	-3.1272	0.375976	0.42484	0.41709	0.066608
SMC3	-3.3808	0.258041	0.588311	0.74442	0.036627
SMC4	-3.4321	0.108145	0.965994	0.99848	0.0065862
SMC5	-2.1993	0.302263	0.519615	0.9866	0.04555
SMC6	-3.7683	0.108145	0.965994	0.9983	0.0072088
SMEK2	0.77088	0.891563	0.049848	0.23743	0.64679
SMG1	-2.283	0.678284	0.168588	0.96034	0.15447
SMG6	-1.3261	0.664774	0.177326	0.46085	0.14339
SMUG1	0.36843	0.999995	2.17148e-06	0.41299	0.74592
SOD1	-4.5853	0.14305	0.844512	0.93282	0.012061
SP100	1.1035	0.483082	0.315979	0.053357	0.98388
SP140	0.36276	0.999995	2.17148e-06	0.5301	0.90831
SPIDR	0.18629	0.999995	2.17148e-06	0.67811	0.90448
SPO11	0.75234	0.452825	0.34407	0.03551	0.99002
SPRTN	0.32867	0.999995	2.17148e-06	0.66068	0.80243
SPTBN1	1.1257	0.262888	0.580229	0.010242	0.99734
SSBP1	0.29837	0.999995	2.17148e-06	0.38283	0.68837
SSBP2	0.078999	0.999995	2.17148e-06	0.71381	0.79529
SSBP3	0.49466	0.758896	0.119818	0.15394	0.44794
SSRP1	-4.1844	0.108052	0.966367	0.99852	0.0064578
STAG1	1.2247	0.550098	0.25956	0.070956	0.97806
STAG2	1.2655	0.54682	0.262156	0.066934	0.84643
STRA13	0.59726	0.986398	0.00594782	0.34003	0.88218
SUMO1	0.65096	0.946111	0.0240579	0.31255	0.68901
SUMO2	-1.8638	0.770728	0.113099	0.80343	0.19818
SUMO3	0.22517	0.990179	0.00428629	0.3531	0.81966
SUMO4	1.0231	0.419458	0.377312	0.029166	0.98881
SUPT16H	-3.3929	0.162634	0.788789	0.99572	0.016142
SUPT4H1	-4.1546	0.120434	0.919251	0.86348	0.0092741
SUPT5H	-1.9728	0.592367	0.227409	0.62085	0.11696
SUPT6H	-3.0664	0.071025	1.14859	0.99944	0.002762
SUV39H1	-0.36096	0.999995	2.17148e-06	0.91305	0.50271
SUV39H2	0.72386	0.771788	0.112502	0.15979	0.6301
SUV420H1	-0.87303	0.999995	2.17148e-06	0.49716	0.34834
SUV420H2	0.43217	0.943549	0.0252355	0.30616	0.90529
SWI5
Scrambled
TADA2B	1.0555	0.407164	0.390231	0.023919	0.99341
TADA3	-0.39898	0.999995	2.17148e-06	0.19776	0.58756
TAF1	1.151	0.601682	0.220633	0.086481	0.75886
TAF1L	-1.1428	0.689794	0.161281	0.92709	0.16358
TAF6L	-0.59737	0.999995	2.17148e-06	0.84761	0.42922
TAF9	-0.41474	0.999995	2.17148e-06	0.64824	0.47756
TAOK2	1.965	0.06713	1.17308	0.00071643	0.99977
TAOK3	1.1836	0.179398	0.746182	0.0038292	0.71456
TCEA1	-0.42388	0.999995	2.17148e-06	0.37911	0.55241
TCEB1
TCEB2	-3.9836	0.073105	1.13605	0.99932	0.0033549
TCEB3	-0.67554	0.999995	2.17148e-06	0.83529	0.54144
TCOF1	-2.3883	0.120434	0.919251	0.99764	0.0092049
TDG	-1.3395	0.627632	0.202295	0.78158	0.13171
TDP1	0.16895	0.999995	2.17148e-06	0.63872	0.9149
TDP2	0.21962	0.999995	2.17148e-06	0.72062	0.88535
TELO2	-2.627	0.144188	0.841071	0.99661	0.012733
TEN1	-0.98355	0.850871	0.0701363	0.9227	0.24427
TEP1	0.36572	0.968533	0.0138856	0.33077	0.92285
TERF1	0.61022	0.999995	2.17148e-06	0.37693	0.78093
TERF2
TERF2IP	-0.060045	0.999995	2.17148e-06	0.67552	0.70736
TERT	-1.0847	0.770728	0.113099	0.97693	0.19792
TET2	0.66784	0.88921	0.0509957	0.22967	0.93717
TFPT	0.1979	0.999995	2.17148e-06	0.43235	0.88894
THOC1	-3.4414	0.184888	0.733091	0.91106	0.021508
THOC2	-3.3183	0.242684	0.614959	0.99007	0.033732
THRAP3	0.42126	0.900916	0.0453157	0.27216	0.75044
TICRR	-1.5001	0.681434	0.166576	0.96914	0.15709
TIMELESS	-4.2833	0.209058	0.679733	0.86272	0.02548
TINF2	-2.3181	0.376185	0.424599	0.86946	0.067448
TIPIN	-1.7088	0.675094	0.170636	0.7084	0.14842
TNKS	0.16848	0.999995	2.17148e-06	0.66744	0.8933
TNP1	1.4438	0.258558	0.587442	0.0091061	0.97992
TONSL	-6.773	0.020833	1.68125	0.99998	0.00010376
TOP1	-0.99528	0.999995	2.17148e-06	0.69136	0.31969
TOP2A	-4.4808	0.065538	1.18351	0.99953	0.0021987
TOP2B	0.10569	0.999995	2.17148e-06	0.82419	0.90069
TOP3A	-2.2626	0.454164	0.342787	0.59593	0.082884
TOP3B	0.72314	0.84772	0.0717476	0.2011	0.95548
TOPBP1	-1.9516	0.678284	0.168588	0.61739	0.15407
TOPORS	-1.3968	0.911938	0.0400347	0.78951	0.27345
TP53	4.0225	0.001157	2.93667	4.9409e-06	0.99993
TP53BP1	1.8074	0.146862	0.833091	0.0028213	0.99917
TP63	0.7023	0.567695	0.245885	0.076945	0.93106
TP73	0.61012	0.918761	0.0367974	0.28654	0.91287
TPP1	-0.46955	0.999995	2.17148e-06	0.90911	0.59575
TRAIP	-3.5966	0.097667	1.01025	0.9988	0.0054202
TRAPPC13	-0.40695	0.999995	2.17148e-06	0.92096	0.57133
TREX1	0.69737	0.820563	0.0858881	0.18086	0.96658
TREX2	1.1915	0.483082	0.315979	0.05391	0.97084
TRIM28	-1.0407	0.999995	2.17148e-06	0.75095	0.34251
TRIM29	0.67623	0.895765	0.0478059	0.25588	0.71405
TRIM34
TRIM65	0.41093	0.999995	2.17148e-06	0.43242	0.69669
TRIP12	1.2448	0.417957	0.378868	0.02721	0.92727
TRIP13	-2.6546	0.311117	0.507076	0.86249	0.049305
TRRAP	-4.4286	0.208743	0.680388	0.70277	0.025174
TTI1	-2.3487	0.156034	0.806781	0.99594	0.015154
TTI2	-2.3196	0.315934	0.500404	0.984	0.051588
TYMS	1.0379	0.531073	0.274846	0.062913	0.89505
UBA1	-3.606	0.120434	0.919251	0.99761	0.009284
UBA2	-1.3971	0.177929	0.749753	0.99473	0.019433
UBA3	-1.2858	0.763869	0.116981	0.97652	0.19272
UBB
UBC	0.67907	0.918761	0.0367974	0.28565	0.77911
UBE2A	0.79485	0.898198	0.0466279	0.26299	0.92438
UBE2B	0.65036	0.999995	2.17148e-06	0.40225	0.97378
UBE2C	-3.3781	0.108145	0.965994	0.99829	0.0072878
UBE2D1	1.0553	0.552457	0.257702	0.073111	0.95441
UBE2D2	-0.14959	0.999995	2.17148e-06	0.80964	0.6795
UBE2D3	-2.9216	0.129081	0.889138	0.30497	0.01047
UBE2D4	-0.48632	0.999995	2.17148e-06	0.79356	0.55794
UBE2F	1.124	0.666146	0.176431	0.11273	0.97413
UBE2I	-5.3717	0.060504	1.21822	0.9994	0.0018726
UBE2K	1.4371	0.373488	0.427723	0.019531	0.9794
UBE2M	-3.3552	0.180996	0.742331	0.99145	0.020282
UBE2N	-0.34395	0.999995	2.17148e-06	0.72962	0.54021
UBE2NL
UBE2R2	0.60028	0.891563	0.049848	0.23639	0.8919
UBE2S	-2.0903	0.22697	0.644032	0.99212	0.028583
UBE2T	-0.96676	0.999995	2.17148e-06	0.94072	0.34971
UBE2U	1.337	0.407164	0.390231	0.023534	0.96774
UBE2V1
UBE2V2	0.42121	0.999995	2.17148e-06	0.61864	0.92547
UBE2W	0.040817	0.999995	2.17148e-06	0.56851	0.83806
UBR5	-2.5071	0.627923	0.202094	0.97347	0.13269
UCHL3	0.62277	0.900916	0.0453157	0.27369	0.90507
UCHL5	0.27419	0.999995	2.17148e-06	0.59447	0.79804
UHRF1
UHRF2	0.57752	0.91742	0.0374318	0.28296	0.84175
UIMC1	-1.2766	0.810417	0.0912915	0.97049	0.22488
UNG	0.25452	0.968393	0.0139484	0.32865	0.92474
UPF1	-1.642	0.31227	0.50547	0.98032	0.050264
USP1	-0.56009	0.999995	2.17148e-06	0.54064	0.56094
USP10	-0.78512	0.999995	2.17148e-06	0.96641	0.41686
USP11	0.67174	0.898198	0.0466279	0.26737	0.95068
USP13	0.39533	0.999995	2.17148e-06	0.57287	0.61791
USP14	1.038	0.427447	0.369118	0.031617	0.99134
USP15	0.037721	0.999995	2.17148e-06	0.5207	0.16488
USP20	0.17011	0.999995	2.17148e-06	0.83044	0.80817
USP22	-0.22735	0.999995	2.17148e-06	0.90448	0.79666
USP26	0.77408	0.84772	0.0717476	0.20175	0.93579
USP28	1.7939	0.011243	1.94912	8.3995e-05	0.99999
USP3	0.0058002	0.999995	2.17148e-06	0.6523	0.77364
USP34	0.53294	0.895765	0.0478059	0.25664	0.75697
USP37	-1.1891	0.911938	0.0400347	0.98147	0.27203
USP4	0.3597	0.999995	2.17148e-06	0.52924	0.91691
USP44	0.2219	0.999995	2.17148e-06	0.84858	0.80408
USP45	0.73293	0.895765	0.0478059	0.25603	0.91674
USP47	0.54138	0.999995	2.17148e-06	0.39231	0.8904
USP48	0.38872	0.999995	2.17148e-06	0.59598	0.95731
USP5	-3.4385	0.290068	0.5375	0.60258	0.04303
USP51	0.88091	0.662405	0.178876	0.10675	0.91191
USP7	-3.2662	0.164352	0.784225	0.95831	0.016488
UVRAG	-1.0478	0.796794	0.0986539	0.30713	0.21303
UVSSA	0.54267	0.898198	0.0466279	0.26682	0.91106
VCP	-4.2363	0.054591	1.26288	0.99974	0.0012303
WAPAL	-3.3922	0.321519	0.492793	0.9458	0.052843
WDR48	-0.22134	0.999995	2.17148e-06	0.67294	0.56116
WDR70	-1.9733	0.065538	1.18351	0.98222	0.0022382
WDR76	-0.13581	0.999995	2.17148e-06	0.76503	0.68935
WEE1	-3.3403	0.149358	0.825772	0.98181	0.014007
WHSC1	-1.3144	0.699727	0.155071	0.89932	0.16952
WRAP53	-2.9227	0.328328	0.483692	0.97378	0.056064
WRN	0.62086	0.990267	0.00424769	0.35973	0.93562
WRNIP1	0.35203	0.999995	2.17148e-06	0.6228	0.94035
XAB2	-3.6511	0.398775	0.399272	0.94953	0.07235
XPA	0.53999	0.999995	2.17148e-06	0.50616	0.8645
XPC	0.20873	0.999995	2.17148e-06	0.72961	0.90131
XRCC1	-0.31912	0.999995	2.17148e-06	0.83349	0.5124
XRCC2	-1.3545	0.823212	0.0844883	0.7677	0.23106
XRCC3	-3.6446	0.242684	0.614959	0.88688	0.033564
XRCC4	-0.59244	0.999995	2.17148e-06	0.61554	0.38088
XRCC5	-4.0909	0.120808	0.917904	0.99759	0.0095409
XRCC6	-2.5448	0.227474	0.643068	0.99203	0.028889
XRCC6BP1	0.50819	0.999995	2.17148e-06	0.42262	0.77873
YBX1	-0.50683	0.601329	0.220888	0.97716	0.11937
YTHDF2	-0.78874	0.999995	2.17148e-06	0.77943	0.32524
ZBTB2	-0.17214	0.999995	2.17148e-06	0.82393	0.5508
ZBTB32	0.42779	0.999995	2.17148e-06	0.59205	0.9301
ZDHHC16	-0.69894	0.914327	0.0388985	0.91837	0.27539
ZMPSTE24	0.063925	0.999995	2.17148e-06	0.73832	0.55237
ZMYM3	0.31357	0.999995	2.17148e-06	0.40394	0.75289
ZMYND8	-0.015475	0.999995	2.17148e-06	0.31318	0.49632
ZNF451	0.17962	0.999995	2.17148e-06	0.72943	0.82659
ZNF827	0.44339	0.999995	2.17148e-06	0.54447	0.94211
ZRANB3	-0.24752	0.999995	2.17148e-06	0.70091	0.77456
ZSWIM7	1.0442	0.483082	0.315979	0.05475	0.98339

## Sheet: MSKCC, WT
Gene	lfc	fdr	fdr_log10	pos_p	neg_p
ABL1	2.7898	0.44892	0.347831	0.014373	0.99621
ACD	1.5735	0.946073	0.0240754	0.34733	0.64819
ACTL6A	-3.5154	0.68425	0.164785	0.76274	0.14094
ACTR5	-1.3992	0.775838	0.110229	0.97607	0.18382
ACTR8	-3.5169	0.442534	0.354053	0.96858	0.067537
ADH5	1.3186	0.964778	0.0155726	0.39077	0.70697
AICDA	1.2626	0.999995	2.17148e-06	0.50566	0.88265
AKAP8	1.6182	0.918843	0.0367587	0.3012	0.86937
ALDH2	2.1101	0.886476	0.052333	0.26662	0.84841
ALKBH1	1.2371	0.999995	2.17148e-06	0.59581	0.62926
ALKBH2	1.9509	0.918843	0.0367587	0.30754	0.72152
ALKBH3	1.0112	0.999995	2.17148e-06	0.55619	0.86902
AMN1	2.757	0.530519	0.275299	0.036627	0.79107
ANKRD28	0.98558	0.999995	2.17148e-06	0.53103	0.52686
ANKRD32	0.66448	0.999995	2.17148e-06	0.50779	0.81608
ANKRD44	2.3296	0.654494	0.184094	0.081026	0.97464
ANKRD52	-1.4071	0.384396	0.415221	0.97868	0.054335
ANP32E	1.9759	0.701905	0.153722	0.11761	0.91843
APAF1	1.5298	0.912397	0.0398162	0.28823	0.82925
APBB1	1.9794	0.786323	0.104399	0.15777	0.79782
APC	1.8534	0.918843	0.0367587	0.31052	0.63293
APEX1	-0.57802	0.999995	2.17148e-06	0.9387	0.50151
APEX2	-3.5049	0.282937	0.54831	0.99133	0.031627
APITD1
APLF	1.9018	0.822142	0.0850532	0.18984	0.80395
APOBEC1	0.48993	0.999995	2.17148e-06	0.77621	0.69146
APOBEC2	1.8918	0.779905	0.107958	0.15398	0.80421
APOBEC3A	2.285	0.764759	0.116475	0.14547	0.78428
APOBEC3B	2.2821	0.841173	0.0751147	0.21366	0.95761
APOBEC3C	2.5291	0.763126	0.117404	0.14334	0.75046
APOBEC3D	2.1379	0.841173	0.0751147	0.21359	0.94763
APOBEC3F	2.5728	0.513692	0.289297	0.025204	0.99305
APOBEC3G	2.0734	0.678	0.16877	0.093941	0.96976
APOBEC3H	1.3315	0.999995	2.17148e-06	0.4687	0.73488
APTX	0.86989	0.920125	0.0361532	0.32141	0.52221
ARID1A	1.3358	0.955195	0.019908	0.36375	0.9591
ARID1B	2.1764	0.862333	0.064325	0.24756	0.86488
ARID2	0.69223	0.999995	2.17148e-06	0.52156	0.5518
ASCC1	2.2878	0.530519	0.275299	0.041884	0.98802
ASF1A	1.8308	0.849166	0.0710074	0.22022	0.68383
ASF1B	1.1159	0.994119	0.00256163	0.42014	0.87491
ASH1L	2.409	0.683602	0.165197	0.11308	0.82118
ASH2L	0.36221	0.999995	2.17148e-06	0.69593	0.62006
ATAD5	1.0253	0.999995	2.17148e-06	0.68515	0.61616
ATF2	2.3267	0.530519	0.275299	0.034038	0.99057
ATM	2.787	0.678	0.16877	0.1097	0.51895
ATMIN	-1.7018	0.816646	0.0879662	0.9681	0.1961
ATR	1.3226	0.98147	0.00812297	0.40746	0.29543
ATRIP	-0.89519	0.882477	0.0542966	0.89318	0.22171
ATRX	-1.2457	0.999995	2.17148e-06	0.93543	0.35979
ATXN3	2.0261	0.821748	0.0852613	0.1828	0.95782
ATXN7	2.0725	0.894635	0.0483541	0.27307	0.93164
AUNIP	0.53385	0.999995	2.17148e-06	0.81747	0.86356
BABAM1	4.0245	0.117063	0.93158	0.00083501	0.92706
BAP1	-2.9694	0.456034	0.341003	0.97891	0.070571
BARD1	-2.5393	0.529153	0.276419	0.94411	0.092864
BAZ1A	1.6741	0.978742	0.00933177	0.40351	0.8904
BAZ1B	-2.052	0.894337	0.0484988	0.9647	0.23388
BCAS2	-0.46835	0.999995	2.17148e-06	0.9179	0.44749
BCCIP	-1.4349	0.529153	0.276419	0.97672	0.093181
BCLAF1	0.6627	0.999995	2.17148e-06	0.7305	0.75444
BEND3	1.0223	0.999995	2.17148e-06	0.56729	0.84091
BLM	-0.94206	0.999995	2.17148e-06	0.80945	0.41341
BMI1	1.2991	0.818332	0.0870705	0.17716	0.66126
BOD1L1	-0.38989	0.623855	0.204916	0.80107	0.12002
BPTF	-1.9477	0.72996	0.136701	0.97211	0.1636
BRAP	-4.6087	0.225014	0.64779	0.99149	0.01633
BRAT1	-0.89635	0.999995	2.17148e-06	0.55156	0.38291
BRCA1	-1.9993	0.353147	0.452044	0.9871	0.044187
BRCA2	-2.2891	0.239442	0.6208	0.99437	0.020954
BRCC3	2.8918	0.530519	0.275299	0.036192	0.95459
BRD1	0.1268	0.999995	2.17148e-06	0.71781	0.63113
BRD2	-1.901	0.328622	0.483303	0.98872	0.039631
BRD4	-2.3399	0.711328	0.14793	0.54188	0.15212
BRD7	1.4577	0.976743	0.0102197	0.3997	0.9075
BRD8	-2.3342	0.256868	0.59029	0.99344	0.02385
BRDT	0.92163	0.999995	2.17148e-06	0.73242	0.89821
BRE	2.839	0.530519	0.275299	0.039601	0.92389
BRIP1	-0.71994	0.894337	0.0484988	0.54434	0.2335
BTG2	1.2211	0.993455	0.0028518	0.41774	0.84435
BUB1B	-0.59496	0.999995	2.17148e-06	0.79937	0.33364
C10orf12	2.3709	0.786323	0.104399	0.15656	0.88909
C11orf30	0.24325	0.999995	2.17148e-06	0.69283	0.56021
C15orf41	-0.98269	0.999995	2.17148e-06	0.48241	0.42197
C17orf70	-2.6054	0.168885	0.772409	0.99786	0.0086515
C19orf40	1.5049	0.951014	0.0218131	0.35117	0.82523
C1orf115	-0.59813	0.999995	2.17148e-06	0.64068	0.49827
C1orf86	0.87915	0.999995	2.17148e-06	0.8575	0.76736
C20orf196	1.3601	0.938675	0.0274847	0.3336	0.65802
C4orf27	2.5053	0.678	0.16877	0.093339	0.92075
C7orf49	-0.060206	0.999995	2.17148e-06	0.86228	0.77132
C9orf142	1.9484	0.678	0.16877	0.10182	0.96678
CAND1	6.9329	0.001543	2.81163	4.9409e-06	1
CASP3	2.1111	0.833886	0.0788933	0.20113	0.78759
CBX1	2.0838	0.543396	0.264884	0.049325	0.9852
CBX3	1.5972	0.918053	0.0371322	0.29785	0.81017
CBX4	3.1345	0.144943	0.838803	0.0020109	0.99954
CBX5	0.39853	0.999995	2.17148e-06	0.83105	0.59497
CCDC101	-2.5603	0.486051	0.313318	0.97389	0.080206
CCNA1	1.4295	0.920125	0.0361532	0.32209	0.92353
CCNA2	-3.3385	0.435415	0.361097	0.46141	0.065521
CCNB1	-0.0051125	0.999995	2.17148e-06	0.86494	0.58579
CCNB2	1.0023	0.999995	2.17148e-06	0.67435	0.84958
CCNB3	2.9516	0.513692	0.289297	0.023899	0.72597
CCNC	-0.91217	0.857428	0.0668023	0.97911	0.21047
CCND1	-5.4678	0.083606	1.07776	0.99968	0.0014872
CCND2	0.62335	0.999995	2.17148e-06	0.47607	0.52318
CCND3	2.2233	0.543396	0.264884	0.04804	0.80283
CCNE1	2.383	0.838042	0.0767342	0.20923	0.94248
CCNH	-1.5906	0.894337	0.0484988	0.98276	0.23693
CCNO	1.6911	0.560827	0.251171	0.05975	0.98179
CDC25A	1.9619	0.543396	0.264884	0.046884	0.98609
CDC25B	-1.4685	0.717458	0.144204	0.959	0.1565
CDC34	2.3685	0.826317	0.0828533	0.19665	0.93626
CDC5L	-2.4598	0.681785	0.166353	0.91756	0.13853
CDC7	-5.6128	0.230967	0.63645	0.712	0.019363
CDCA5	-1.6947	0.947306	0.0235097	0.93717	0.25679
CDK1	-5.4487	0.083606	1.07776	0.9997	0.0013983
CDK12	-1.8701	0.759538	0.11945	0.90452	0.17468
CDK2	-3.0377	0.593056	0.226904	0.97618	0.1076
CDK4	-5.5262	0.083606	1.07776	0.99795	0.00125
CDK7	-6.2747	0.130855	0.88321	0.99913	0.0042245
CDK8	3.0291	0.587651	0.230881	0.065008	0.7179
CDK9	-4.8963	0.384396	0.415221	0.51898	0.052952
CDKL5	1.9545	0.826317	0.0828533	0.19842	0.69298
CDKN1A	3.9952	0.127525	0.894405	0.0013686	0.99937
CDKN1B	3.2001	0.530519	0.275299	0.034917	0.94126
CDKN2A	2.5474	0.530519	0.275299	0.029897	0.99176
CDKN2D	2.3352	0.838042	0.0767342	0.20344	0.92206
CEP164	0.073052	0.999995	2.17148e-06	0.80426	0.58722
CEP57	0.60283	0.999995	2.17148e-06	0.61664	0.59034
CEP63	1.5658	0.951014	0.0218131	0.3508	0.92847
CETN2	0.46741	0.999995	2.17148e-06	0.45743	0.49267
CHAF1A	-4.7614	0.282937	0.54831	0.98695	0.031706
CHAF1B	-4.1025	0.205146	0.687937	0.99647	0.013355
CHD1L	2.2861	0.712082	0.14747	0.12336	0.9624
CHD3	2.4254	0.747106	0.126618	0.13395	0.85171
CHD4
CHEK1	-5.6598	0.199242	0.700619	0.85487	0.011695
CHEK2	2.4793	0.560827	0.251171	0.060215	0.98154
CHFR	-0.18217	0.999995	2.17148e-06	0.78606	0.57423
CHRAC1	1.8245	0.914855	0.0386477	0.29014	0.56544
CHTF18	1.4725	0.920125	0.0361532	0.31727	0.79745
CIB1	0.92749	0.999995	2.17148e-06	0.70498	0.92637
CLK2	0.26219	0.999995	2.17148e-06	0.47226	0.77177
CLSPN	-1.3893	0.339998	0.468524	0.98795	0.042092
CNOT4	1.9296	0.875916	0.0575375	0.25988	0.85719
CNOT7	-1.4783	0.999995	2.17148e-06	0.3959	0.30182
COL1A1	0.059693	0.999995	2.17148e-06	0.54398	0.39771
COL21A1	1.4975	0.822077	0.0850875	0.18512	0.88799
COPS2	-2.5395	0.485743	0.313593	0.68632	0.078279
COPS3	-2.2173	0.816646	0.0879662	0.83024	0.19457
COPS4	-0.51761	0.999995	2.17148e-06	0.41929	0.40843
COPS5	-6.6113	0.147262	0.831909	0.96127	0.0065072
COPS6	-1.1248	0.882477	0.0542966	0.78939	0.22505
COPS7A	3.274	0.402037	0.395734	0.010727	0.99617
COPS7B	2.0007	0.678	0.16877	0.11143	0.96295
COPS8	-0.17508	0.999995	2.17148e-06	0.72319	0.74349
CREBBP	2.5056	0.530519	0.275299	0.040392	0.80873
CRY1	1.1474	0.919442	0.0364757	0.31423	0.80936
CRY2	0.16545	0.999995	2.17148e-06	0.77238	0.84355
CSNK1D	1.2537	0.964778	0.0155726	0.38097	0.93543
CSNK1E	0.12224	0.999995	2.17148e-06	0.59493	0.44016
CSNK2A1	1.1774	0.999995	2.17148e-06	0.5307	0.70087
CSNK2A2	1.7779	0.924649	0.0340231	0.32565	0.70984
CSNK2B	-5.4839	0.147262	0.831909	0.99827	0.0073867
CTC1	-4.806	0.361149	0.442314	0.98591	0.047408
CTCF	-6.9339	0.051768	1.28594	0.99916	0.0005682
CUL1	-1.416	0.882477	0.0542966	0.69503	0.22509
CUL2	-2.7754	0.256868	0.59029	0.99325	0.024512
CUL3	1.1065	0.613931	0.21188	0.07148	0.43165
CUL4A	0.77789	0.678	0.16877	0.098952	0.7851
CUL4B	2.5774	0.587651	0.230881	0.065225	0.97977
CUL5	3.6183	0.306217	0.513971	0.0068629	0.76433
CUL7	2.5183	0.678	0.16877	0.099139	0.96786
CUL9	1.8528	0.764759	0.116475	0.14665	0.88178
CXXC1	-2.6421	0.758242	0.120192	0.97714	0.17317
CXorf57	1.7161	0.907518	0.0421448	0.28378	0.1299
DAXX	0.1531	0.904973	0.0433644	0.28105	0.20482
DBF4	-1.2121	0.999995	2.17148e-06	0.89918	0.30587
DCAF11	1.4354	0.999995	2.17148e-06	0.49298	0.92019
DCLRE1A	0.5696	0.751508	0.124066	0.13884	0.23307
DCLRE1B	-5.9839	0.147262	0.831909	0.99858	0.0062107
DCLRE1C	1.3353	0.999995	2.17148e-06	0.49862	0.83274
DCUN1D1	1.9813	0.678	0.16877	0.10383	0.8933
DCUN1D2	1.8324	0.792098	0.101221	0.16315	0.92974
DCUN1D3	2.9912	0.530519	0.275299	0.042003	0.82087
DCUN1D4	1.5623	0.999995	2.17148e-06	0.42924	0.41392
DCUN1D5	1.5102	0.894546	0.0483973	0.27113	0.8236
DDB1	-1.7169	0.987304	0.0055491	0.6781	0.27396
DDB2
DDX1	-2.9821	0.747794	0.126218	0.66946	0.16858
DDX11	-4.7719	0.147262	0.831909	0.99831	0.0071594
DICER1	-1.7508	0.623855	0.204916	0.98044	0.12118
DKC1	-7.0182	0.006944	2.15839	1	1.4823e-05
DLGAP5	-0.1275	0.999995	2.17148e-06	0.29193	0.36007
DMC1	0.25506	0.999995	2.17148e-06	0.65415	0.51468
DNA2	-2.0195	0.608583	0.21568	0.95794	0.11301
DNAJC2	-0.41578	0.933593	0.0298424	0.43465	0.25208
DNMT1	-0.56665	0.999995	2.17148e-06	0.24717	0.38702
DNTT	1.573	0.560827	0.251171	0.060314	0.98152
DPY30	-1.758	0.978126	0.0096052	0.97866	0.26932
DROSHA	-0.14047	0.999995	2.17148e-06	0.89624	0.68179
DSCC1	-2.4887	0.256868	0.59029	0.99319	0.024779
DTX1	1.5407	0.786531	0.104284	0.15967	0.917
DTX2	1.0916	0.964778	0.0155726	0.37965	0.82241
DTX3	0.49959	0.999995	2.17148e-06	0.49313	0.86065
DTX3L	1.122	0.999995	2.17148e-06	0.55174	0.87676
DTX4	1.5013	0.98073	0.00845054	0.40611	0.82809
DUT	-5.5592	0.256868	0.59029	0.83266	0.024324
DYNLL1	-1.2418	0.999995	2.17148e-06	0.71933	0.2821
ECT2	-2.7118	0.709948	0.148773	0.92002	0.14775
EEPD1	2.0407	0.526944	0.278236	0.028119	0.95376
EID3	2.8835	0.530519	0.275299	0.037388	0.98914
EIF4A1	-4.8298	0.205146	0.687937	0.99668	0.012565
EME1	2.2976	0.673264	0.171815	0.086224	0.97269
EME2	-0.38052	0.999995	2.17148e-06	0.51284	0.51775
ENDOV	1.9644	0.660792	0.179935	0.083566	0.97362
ENY2	-3.3298	0.503863	0.297688	0.71949	0.083902
EP300	4.1228	0.127525	0.894405	0.0013291	0.94695
EP400
ERCC1	-3.4227	0.361149	0.442314	0.98594	0.04721
ERCC2	-5.6734	0.205146	0.687937	0.92471	0.013355
ERCC3	-3.3004	0.230668	0.637013	0.99512	0.018217
ERCC4	1.0032	0.999995	2.17148e-06	0.44391	0.29945
ERCC5	-0.33452	0.999995	2.17148e-06	0.88719	0.56493
ERCC6	1.4367	0.956623	0.0192592	0.36754	0.87328
ERCC6L	0.23428	0.999995	2.17148e-06	0.65819	0.43067
ERCC6L2	1.4459	0.999995	2.17148e-06	0.42612	0.73315
ERCC8	1.52	0.999995	2.17148e-06	0.47241	0.69957
ESCO2	-4.2285	0.292771	0.533472	0.94596	0.034058
ETAA1	1.0832	0.999995	2.17148e-06	0.72402	0.81483
EXD2	3.1607	0.51328	0.289646	0.020816	0.66472
EXO1	1.375	0.964778	0.0155726	0.38167	0.90557
EXO5	1.6522	0.918843	0.0367587	0.30743	0.79908
EYA1	3.2409	0.127525	0.894405	0.0012797	0.99972
EYA2	1.4702	0.678	0.16877	0.10516	0.96543
EYA3	0.55198	0.999995	2.17148e-06	0.71427	0.86606
EYA4	2.1803	0.838042	0.0767342	0.21018	0.93201
EZH2	0.39937	0.999995	2.17148e-06	0.62229	0.76783
FAF1	0.94911	0.999995	2.17148e-06	0.56087	0.63009
FAM122A	0.41521	0.955195	0.019908	0.36127	0.79272
FAM175A	0.71791	0.999995	2.17148e-06	0.57345	0.72977
FAM175B	2.4739	0.543396	0.264884	0.051687	0.82308
FAM178A	-0.05277	0.999995	2.17148e-06	0.88561	0.69355
FAM35A	-2.3257	0.549762	0.259825	0.1277	0.097983
FAN1	1.7553	0.918843	0.0367587	0.30913	0.77206
FANCA	-1.5275	0.672995	0.171988	0.59877	0.13503
FANCB	-2.3284	0.760518	0.118891	0.1888	0.17613
FANCC	0.28675	0.999995	2.17148e-06	0.78423	0.63184
FANCD2	0.58653	0.999995	2.17148e-06	0.67965	0.75319
FANCE	0.63261	0.999995	2.17148e-06	0.84323	0.82754
FANCF	-0.30484	0.999995	2.17148e-06	0.7015	0.39877
FANCG	-0.56898	0.999995	2.17148e-06	0.92222	0.45079
FANCI	-3.5746	0.269861	0.56886	0.99212	0.028593
FANCL	-0.38763	0.999995	2.17148e-06	0.20485	0.32249
FANCM	-0.17053	0.999995	2.17148e-06	0.41557	0.37081
FBXO18	2.1041	0.857565	0.066733	0.23665	0.9485
FBXO22	2.4027	0.526944	0.278236	0.02803	0.99239
FBXW7	0.26315	0.999995	2.17148e-06	0.91183	0.83186
FEN1	-6.4593	0.175109	0.756692	0.73331	0.009531
FIGNL1	1.1816	0.999995	2.17148e-06	0.4748	0.84269
FOXM1	-0.61792	0.926459	0.0331738	0.96304	0.24916
FOXN3	0.15944	0.999995	2.17148e-06	0.70742	0.51517
FOXO3	-1.6177	0.967068	0.014543	0.23851	0.26421
FZR1	-0.5484	0.999995	2.17148e-06	0.80383	0.4616
GABBR1	-0.25886	0.999995	2.17148e-06	0.8674	0.69561
GADD45A	3.557	0.326196	0.486521	0.0082266	0.78365
GADD45G	2.9787	0.530519	0.275299	0.041518	0.74331
GAR1	-2.69	0.711328	0.14793	0.95408	0.1509
GEN1	0.76022	0.999995	2.17148e-06	0.65656	0.75071
GLG1	2.444	0.779905	0.107958	0.1533	0.81281
GPI	-1.3509	0.717458	0.144204	0.95573	0.15575
GPS1	-6.2834	0.084064	1.07539	0.99032	0.0016354
GTF2H1	-2.2913	0.256868	0.59029	0.99311	0.024947
GTF2H2
GTF2H3	-2.3893	0.177411	0.751019	0.99745	0.0099658
GTF2H4	-4.8521	0.256868	0.59029	0.94681	0.02466
GTF2H5	1.7461	0.918053	0.0371322	0.29774	0.9554
H2AFX	1.4769	0.786323	0.104399	0.15759	0.93221
H2AFY	2.69	0.543396	0.264884	0.050867	0.93451
H2AFY2	-1.2667	0.999995	2.17148e-06	0.74453	0.34469
H2AFZ	1.9223	0.764759	0.116475	0.14488	0.67385
H3F3A
H3F3B	-0.77347	0.999995	2.17148e-06	0.31376	0.27973
HDAC1	1.3602	0.822142	0.0850532	0.18823	0.40955
HDAC10	1.2162	0.964778	0.0155726	0.37583	0.70171
HDAC2	0.5074	0.999995	2.17148e-06	0.699	0.82157
HDAC3	-6.0379	0.079416	1.10009	0.99977	0.0011018
HDAC4	1.0616	0.999995	2.17148e-06	0.7228	0.90808
HDAC9	0.93287	0.999995	2.17148e-06	0.54628	0.77302
HELB	1.1113	0.999995	2.17148e-06	0.70365	0.78608
HELLS	0.16304	0.999995	2.17148e-06	0.9204	0.42117
HELQ	2.0093	0.826317	0.0828533	0.1941	0.52298
HERC2	1.4978	0.678	0.16877	0.10039	0.96728
HES1	2.2867	0.678	0.16877	0.10011	0.96749
HFM1	2.8059	0.543396	0.264884	0.045106	0.85928
HINFP	-2.6076	0.169352	0.77121	0.99772	0.0090369
HIPK1	1.2763	0.999995	2.17148e-06	0.47363	0.87301
HIPK2	1.7243	0.94312	0.025433	0.34121	0.93678
HLTF	2.075	0.678	0.16877	0.10767	0.96427
HMGA1	0.10664	0.978742	0.00933177	0.40424	0.40474
HMGA2	0.10769	0.999995	2.17148e-06	0.78164	0.74376
HMGB1
HMGB2	-0.20641	0.999995	2.17148e-06	0.87098	0.48633
HMGN1	2.5903	0.810723	0.0911275	0.17132	0.82931
HNRNPK	-4.5239	0.40244	0.395299	0.94736	0.058841
HNRNPUL1	1.0564	0.999995	2.17148e-06	0.67083	0.75484
HNRNPUL2	1.4465	0.999995	2.17148e-06	0.4591	0.75351
HPRT1	1.2015	0.999995	2.17148e-06	0.46742	0.82502
HUS1	-0.72825	0.882477	0.0542966	0.96953	0.22464
HUS1B	1.9689	0.861232	0.0648798	0.24491	0.9275
HUWE1	-4.9972	0.083606	1.07776	0.99968	0.0015169
ID3	-0.76888	0.999995	2.17148e-06	0.86332	0.36963
IGHMBP2	0.21144	0.999995	2.17148e-06	0.7699	0.85219
ING4	2.2971	0.826317	0.0828533	0.19694	0.80654
INO80	-3.3337	0.461944	0.335411	0.88152	0.073951
INO80B	-1.1995	0.999995	2.17148e-06	0.88323	0.28579
INO80C	1.3729	0.822142	0.0850532	0.18768	0.65288
INO80D	-0.79656	0.999995	2.17148e-06	0.69273	0.30631
INO80E	3.0036	0.560827	0.251171	0.059049	0.54112
IP6K3	1.0037	0.999995	2.17148e-06	0.46369	0.7244
KAT2A	-0.39564	0.999995	2.17148e-06	0.90017	0.31646
KAT2B	2.0167	0.764759	0.116475	0.14717	0.83539
KAT5	1.4276	0.933241	0.0300062	0.32967	0.71179
KAT8	-5.8255	0.230967	0.63645	0.99297	0.018642
KDM1A	-0.73839	0.999995	2.17148e-06	0.4332	0.41451
KDM2A	-1.2788	0.754195	0.122516	0.95	0.17144
KDM4A	1.6932	0.875916	0.0575375	0.25521	0.79597
KDM4D	1.1129	0.999995	2.17148e-06	0.55902	0.90232
KDM5A	1.2704	0.999995	2.17148e-06	0.4926	0.61611
KEAP1	6.7065	0.001543	2.81163	4.9409e-06	1
KIAA1586	1.5444	0.999995	2.17148e-06	0.4274	0.82249
KLHL15	2.1409	0.748843	0.125609	0.13746	0.86539
KMT2A	-3.8326	0.353147	0.452044	0.987	0.044473
L3MBTL1	1.0983	0.875916	0.0575375	0.2585	0.85505
LATS1	2.4775	0.543396	0.264884	0.051993	0.9843
LATS2	4.9189	0.071296	1.14693	0.00038045	0.99974
LIG1	0.87986	0.964778	0.0155726	0.38993	0.7288
LIG3	0.67423	0.999995	2.17148e-06	0.56209	0.81807
LIG4	0.74794	0.999995	2.17148e-06	0.73011	0.71924
LMNA	-0.78226	0.999995	2.17148e-06	0.76857	0.35866
Luciferase
MAD2L2	-1.0136	0.486051	0.313318	0.91962	0.080235
MAPK14	0.90871	0.560827	0.251171	0.060452	0.93409
MAPK8	2.9432	0.543396	0.264884	0.052369	0.8859
MAPKAPK2	2.5611	0.678	0.16877	0.095384	0.90988
MARK3	-1.9155	0.623855	0.204916	0.97997	0.11892
MASTL	-4.005	0.214193	0.669195	0.99614	0.01463
MAU2	-5.5888	0.254464	0.594374	0.84245	0.022812
MB21D1	2.1029	0.805532	0.0939172	0.16936	0.84647
MBD4	1.4825	0.955195	0.019908	0.35485	0.80905
MBTD1	-1.6544	0.999995	2.17148e-06	0.7549	0.27913
MCM10	-2.835	0.599388	0.222292	0.95363	0.10939
MCM2	-2.6365	0.610397	0.214388	0.85613	0.114
MCM3	-0.88512	0.999995	2.17148e-06	0.86132	0.32842
MCM3AP	0.12788	0.999995	2.17148e-06	0.67331	0.46967
MCM4	-3.6218	0.50753	0.294538	0.66521	0.085581
MCM5	-5.5111	0.206616	0.684836	0.80345	0.013671
MCM6	-4.3003	0.503863	0.297688	0.8335	0.084425
MCM7	-3.9934	0.334267	0.475906	0.73874	0.040669
MCM8	1.8185	0.857565	0.066733	0.23426	0.91295
MCM9	0.17201	0.999995	2.17148e-06	0.93451	0.76697
MCPH1	-2.6789	0.461627	0.335709	0.79535	0.072933
MCRS1	-1.093	0.774321	0.111079	0.98265	0.1822
MDC1	-1.4833	0.759538	0.11945	0.54377	0.17509
MDM2	-6.1987	0.095139	1.02164	0.99954	0.0020307
MDM4	-0.80637	0.999995	2.17148e-06	0.8668	0.37039
MEN1	-0.57154	0.999995	2.17148e-06	0.88158	0.52661
METTL3	-4.4971	0.130855	0.88321	0.99915	0.0041257
MGMT	2.4426	0.751508	0.124066	0.14036	0.82273
MLH1	1.789	0.735045	0.133686	0.12944	0.8294
MLH3	2.5899	0.678	0.16877	0.11138	0.94964
MMS19	-1.903	0.623855	0.204916	0.46925	0.12002
MMS22L	-3.1986	0.717458	0.144204	0.94241	0.1585
MNAT1	-1.8452	0.619397	0.208031	0.96667	0.11634
MORF4L1	0.60946	0.999995	2.17148e-06	0.53005	0.5574
MORF4L2	1.4158	0.988148	0.005178	0.41234	0.7046
MPG	1.7371	0.613931	0.21188	0.071352	0.9778
MPLKIP	0.90935	0.999995	2.17148e-06	0.5786	0.82416
MPZ	-0.01792	0.999995	2.17148e-06	0.4453	0.50202
MRE11A	-0.24523	0.999995	2.17148e-06	0.15041	0.29153
MSH2	-0.55502	0.999995	2.17148e-06	0.85572	0.37877
MSH3	1.2858	0.999995	2.17148e-06	0.61836	0.46475
MSH4	2.3335	0.530519	0.275299	0.041677	0.97182
MSH5	0.56527	0.999995	2.17148e-06	0.54157	0.54138
MSH6	1.4067	0.999995	2.17148e-06	0.53715	0.91442
MTA1	0.37023	0.999995	2.17148e-06	0.74268	0.38529
MTA2	1.9525	0.918053	0.0371322	0.2968	0.90549
MTA3	-0.011289	0.999995	2.17148e-06	0.73401	0.59371
MTOR	-6.5481	0.075231	1.1236	0.99979	0.00096348
MUM1	0.85881	0.999995	2.17148e-06	0.68444	0.86958
MUS81	1.1672	0.999995	2.17148e-06	0.59879	0.90333
MUTYH	0.72014	0.999995	2.17148e-06	0.67893	0.78035
MVP	1.1264	0.887924	0.0516242	0.26818	0.74749
MYBBP1A	-3.139	0.275623	0.559685	0.87625	0.02971
NABP1	1.5862	0.678	0.16877	0.10796	0.53749
NABP2	-0.89341	0.826216	0.0829064	0.97348	0.20016
NAE1	-5.3758	0.230668	0.637013	0.83494	0.018128
NBN	0.049362	0.701916	0.153715	0.11836	0.32513
NCAPD2	0.60379	0.999995	2.17148e-06	0.6871	0.71219
NCAPD3	-0.73517	0.999995	2.17148e-06	0.44745	0.41505
NCAPG	-3.9073	0.435415	0.361097	0.81342	0.065393
NCAPG2	-6.6753	0.147262	0.831909	0.96696	0.0073669
NCAPH	-1.2777	0.721358	0.141849	0.97959	0.1609
NCAPH2	-5.5502	0.269861	0.56886	0.98092	0.027921
NDNL2	-5.193	0.132143	0.878956	0.99896	0.004936
NEDD8	-4.4364	0.265936	0.575223	0.86479	0.026963
NEIL1	-0.22694	0.999995	2.17148e-06	0.97034	0.3201
NEIL2	1.6627	0.971992	0.0123373	0.39627	0.78779
NEIL3	0.86585	0.999995	2.17148e-06	0.80327	0.80711
NEK1	0.45392	0.999995	2.17148e-06	0.73438	0.771
NEK11	1.7921	0.944809	0.024656	0.34547	0.73436
NEK6	2.8334	0.530519	0.275299	0.033722	0.85339
NEK8	2.2668	0.63763	0.195431	0.076599	0.97618
NEK9	2.1953	0.849166	0.0710074	0.21894	0.79517
NELFB	-3.8276	0.282937	0.54831	0.99156	0.030955
NFATC2IP	0.60243	0.999995	2.17148e-06	0.46659	0.7795
NFE2L2	-1.1305	0.774321	0.111079	0.98395	0.18263
NFRKB	0.87433	0.999995	2.17148e-06	0.58705	0.82973
NHEJ1	0.17519	0.999995	2.17148e-06	0.91992	0.79937
NHP2	-6.8489	0.051768	1.28594	0.99991	0.00044962
NIPBL	-3.4127	0.566441	0.246845	0.98268	0.10156
NLK	1.894	0.63763	0.195431	0.077577	0.97581
NONO	-0.45632	0.999995	2.17148e-06	0.98321	0.34955
NOP10	-0.28823	0.999995	2.17148e-06	0.13157	0.49134
NOTCH1	1.7833	0.779675	0.108086	0.15227	0.76089
NOTCH2	2.5065	0.530519	0.275299	0.042546	0.9877
NOTCH3	1.2124	0.999995	2.17148e-06	0.4923	0.86128
NOTCH4	1.9734	0.918843	0.0367587	0.30512	0.77647
NPM1
NSMCE1	-3.1188	0.514741	0.288411	0.9813	0.089544
NSMCE2	-1.9027	0.711328	0.14793	0.54495	0.14995
NSMCE4A	-3.2913	0.486051	0.313318	0.81957	0.080403
NTHL1	0.15717	0.999995	2.17148e-06	0.76569	0.52997
NUDT1	2.0312	0.854656	0.0682087	0.22408	0.85367
NUDT16L1	0.04544	0.999995	2.17148e-06	0.62087	0.71097
OBFC1	-0.84059	0.999995	2.17148e-06	0.58208	0.31501
OGG1	1.4021	0.999995	2.17148e-06	0.48152	0.72719
OPRM1	1.4096	0.964778	0.0155726	0.38091	0.89206
OR10A7	3.3594	0.446594	0.350087	0.013197	0.97249
OR10AD1	-0.88938	0.322958	0.490854	0.9892	0.038584
OR10G2	1.0457	0.999995	2.17148e-06	0.60356	0.91825
OR10H3	2.3436	0.613931	0.21188	0.072073	0.97749
OR10H5	1.3529	0.964778	0.0155726	0.38563	0.93903
OR10Q1	0.36715	0.999995	2.17148e-06	0.92737	0.87995
OR10R2	2.9486	0.280945	0.551379	0.0056969	0.9987
OR10S1	2.6676	0.513692	0.289297	0.02549	0.993
OR10T2	1.8922	0.821759	0.0852555	0.18417	0.77751
OR10V1	3.1972	0.479658	0.319068	0.016715	0.95596
OR10Z1	1.5048	0.999995	2.17148e-06	0.42844	0.71093
OR11H1
OR11H6	2.4569	0.678	0.16877	0.1034	0.91668
OR13A1	2.4126	0.530519	0.275299	0.036074	0.98981
OR13C2
OR13C4	0.76664	0.999995	2.17148e-06	0.54559	0.88352
OR13J1	1.7008	0.916713	0.0377666	0.29448	0.92399
OR1A2	2.11	0.530519	0.275299	0.039236	0.9889
OR1D5	0.82832	0.999995	2.17148e-06	0.81054	0.86179
OR1E1	1.8403	0.838042	0.0767342	0.20502	0.94411
OR1E2	0.22461	0.999995	2.17148e-06	0.72287	0.72796
OR1F1	0.60304	0.964778	0.0155726	0.38339	0.4631
OR1I1	0.15845	0.943112	0.0254367	0.3392	0.71512
OR1L4	2.3931	0.678	0.16877	0.11066	0.96322
OR1L6	-0.56681	0.999995	2.17148e-06	0.38495	0.40384
OR1N1	1.9918	0.543396	0.264884	0.048653	0.98541
OR2B11	2.0757	0.678	0.16877	0.091856	0.97062
OR2F2	1.1557	0.999995	2.17148e-06	0.45254	0.79567
OR2L13	2.0696	0.802255	0.0956876	0.16675	0.89273
OR2L2	3.5268	0.513692	0.289297	0.024937	0.9793
OR2T10	1.3851	0.919442	0.0364757	0.31597	0.81898
OR2T29
OR2T35
OR2V2	1.5205	0.964778	0.0155726	0.38335	0.95387
OR4A47	-0.27952	0.999995	2.17148e-06	0.64298	0.3073
OR4A5	2.0386	0.818332	0.0870705	0.17816	0.89488
OR4B1	1.1635	0.999995	2.17148e-06	0.65609	0.80836
OR4C11	2.7155	0.530519	0.275299	0.040965	0.98833
OR4C45
OR4C46	-0.36142	0.999995	2.17148e-06	0.7716	0.79326
OR4D1	1.736	0.875916	0.0575375	0.25936	0.55898
OR4D5	3.0769	0.479658	0.319068	0.016893	0.9955
OR4D6	0.62213	0.999995	2.17148e-06	0.67742	0.68048
OR4F15	0.59727	0.999995	2.17148e-06	0.74835	0.84572
OR4F21
OR4F6	1.7776	0.866855	0.0620535	0.24979	0.94568
OR4K1	0.72176	0.999995	2.17148e-06	0.84626	0.9179
OR4K14	0.94015	0.999995	2.17148e-06	0.55737	0.87281
OR4K17	1.809	0.530519	0.275299	0.04303	0.98753
OR4L1	1.4412	0.999995	2.17148e-06	0.5225	0.79169
OR4N5	1.2525	0.857565	0.066733	0.22961	0.3771
OR4P4	1.852	0.907518	0.0421448	0.283	0.88232
OR51B4	2.1528	0.826317	0.0828533	0.19347	0.92737
OR51F1	1.668	0.678	0.16877	0.10122	0.967
OR51G2	2.0781	0.29838	0.52523	0.0063688	0.83626
OR51I1	2.1535	0.822142	0.0850532	0.19094	0.78334
OR51I2	1.0908	0.999995	2.17148e-06	0.65232	0.74933
OR51M1	1.7	0.660792	0.179935	0.083921	0.97345
OR52A5	2.6274	0.560827	0.251171	0.056983	0.78271
OR52B2	1.877	0.920125	0.0361532	0.31905	0.84067
OR52B4	1.8173	0.955195	0.019908	0.35374	0.95691
OR52B6	-1.7095	0.894337	0.0484988	0.78681	0.23746
OR52H1	1.9116	0.908714	0.0415728	0.28512	0.94403
OR52I1	0.28765	0.999995	2.17148e-06	0.68667	0.57529
OR52K1	2.1202	0.857565	0.066733	0.23808	0.91808
OR52L1	2.8095	0.543396	0.264884	0.051667	0.92858
OR52M1	2.2032	0.555904	0.255	0.055175	0.98321
OR52N5	2.8624	0.643116	0.191711	0.078931	0.71333
OR52R1	1.6551	0.955195	0.019908	0.36043	0.76117
OR56A1	1.4188	0.999995	2.17148e-06	0.51035	0.92956
OR56A3	2.7729	0.678	0.16877	0.091412	0.43067
OR56B1	3.278	0.530519	0.275299	0.031627	0.72568
OR5A2	-0.15207	0.999995	2.17148e-06	0.3327	0.58158
OR5AK2	1.2874	0.678	0.16877	0.095453	0.96934
OR5AN1	0.45114	0.820528	0.0859066	0.17952	0.9082
OR5AP2	1.742	0.944809	0.024656	0.34586	0.51822
OR5AR1	3.542	0.530519	0.275299	0.035214	0.98122
OR5B3	2.3289	0.857565	0.066733	0.23213	0.705
OR5F1	1.8498	0.818332	0.0870705	0.17755	0.84151
OR5L1	2.3591	0.543396	0.264884	0.052774	0.9841
OR5L2	2.6482	0.786531	0.104284	0.16101	0.56499
OR5M10
OR5M9	2.3064	0.530519	0.275299	0.030095	0.99169
OR5R1	1.5653	0.904973	0.0433644	0.27973	0.76864
OR5T1	1.6036	0.941584	0.0261409	0.33623	0.75259
OR6B1	0.96203	0.999995	2.17148e-06	0.69061	0.68323
OR6B2	1.8635	0.690379	0.160912	0.11494	0.95179
OR6C4	1.681	0.955195	0.019908	0.36093	0.82779
OR6C6	1.692	0.678	0.16877	0.10304	0.96633
OR6C68	2.7845	0.678	0.16877	0.096323	0.91165
OR6C74	2.7398	0.227941	0.642178	0.0041355	0.99915
OR6K2	1.6507	0.918843	0.0367587	0.31086	0.9437
OR6K3	0.84241	0.999995	2.17148e-06	0.7282	0.79842
OR6K6	1.2787	0.999995	2.17148e-06	0.58016	0.34727
OR6N2	2.1878	0.822142	0.0850532	0.18875	0.94317
OR6V1	2.2663	0.513692	0.289297	0.024314	0.99329
OR6X1	0.036228	0.999995	2.17148e-06	0.87038	0.51964
OR7A5	2.0646	0.786531	0.104284	0.16048	0.88248
OR7D4	1.2955	0.999995	2.17148e-06	0.45318	0.89783
OR7G3	1.3476	0.826317	0.0828533	0.19774	0.76154
OR8B3
OR8B8	1.885	0.857565	0.066733	0.2377	0.91425
OR8D2	1.6085	0.904973	0.0433644	0.27952	0.84603
OR8G1
OR8G2
OR8G5	1.5495	0.964778	0.0155726	0.38931	0.8139
OR8J3	0.6303	0.999995	2.17148e-06	0.86777	0.56706
OR8K3	3.344	0.324285	0.489073	0.0076139	0.9982
OR8U1	0.89545	0.999995	2.17148e-06	0.71402	0.83008
OR9G1	0.9935	0.999995	2.17148e-06	0.63715	0.60346
OR9I1	1.8699	0.838042	0.0767342	0.20877	0.95184
ORC2	-0.35863	0.644097	0.191049	0.22004	0.12648
OTUB1	-0.93934	0.894337	0.0484988	0.98403	0.23308
OTUB2	-0.0563	0.999995	2.17148e-06	0.77095	0.55471
OTUD7B	2.8232	0.530519	0.275299	0.033119	0.88744
PAGR1	1.8721	0.857565	0.066733	0.2423	0.87228
PAK1	2.97	0.569581	0.244445	0.062003	0.89548
PALB2	-1.4327	0.711328	0.14793	0.38872	0.15259
PAPD7	1.7863	0.942088	0.0259085	0.33782	0.89172
PARG
PARK2	1.5941	0.955195	0.019908	0.35777	0.95295
PARK7	0.61598	0.999995	2.17148e-06	0.61455	0.76666
PARP1	-0.52828	0.999995	2.17148e-06	0.78725	0.3858
PARP14	1.6066	0.941584	0.0261409	0.33664	0.90766
PARP15	1.7942	0.857565	0.066733	0.24237	0.93105
PARP2	2.1254	0.530519	0.275299	0.041439	0.98817
PARP3	1.2523	0.999995	2.17148e-06	0.57485	0.56152
PARP4	1.571	0.999995	2.17148e-06	0.44926	0.72847
PARP9	2.1689	0.803501	0.0950136	0.16807	0.75585
PARPBP	1.4949	0.999995	2.17148e-06	0.51732	0.96056
PAXIP1	0.042392	0.999995	2.17148e-06	0.8695	0.5697
PBRM1	-0.11419	0.999995	2.17148e-06	0.73387	0.73723
PCID2	-3.4015	0.361149	0.442314	0.77541	0.047032
PCNA	-5.3877	0.130855	0.88321	0.99903	0.0045703
PDS5A	-0.25048	0.999995	2.17148e-06	0.67256	0.38336
PDS5B	0.60716	0.999995	2.17148e-06	0.88897	0.7601
PER1	1.9709	0.63763	0.195431	0.076312	0.9763
PER2	0.0168	0.999995	2.17148e-06	0.71118	0.52618
PER3	1.8824	0.918843	0.0367587	0.30782	0.9403
PGBD5	1.612	0.976996	0.0101072	0.40143	0.83247
PHF11	2.7818	0.678	0.16877	0.090463	0.95647
PHF3	2.8721	0.530519	0.275299	0.038149	0.9893
PHIP	2.0682	0.854656	0.0682087	0.22391	0.94924
PIAS1	0.31372	0.999995	2.17148e-06	0.83087	0.86013
PIAS2	2.2075	0.821748	0.0852613	0.18227	0.92021
PIAS3	2.191	0.480105	0.318664	0.018958	0.99492
PIAS4	2.6594	0.678	0.16877	0.10409	0.88214
PIF1	2.2349	0.678	0.16877	0.090651	0.97106
PIN1	2.0955	0.678	0.16877	0.088714	0.84215
PINK1	-2.4607	0.605465	0.217911	0.96976	0.11179
PINX1
PLK1	-5.3633	0.098274	1.00756	0.99952	0.0023074
PLRG1	-1.0542	0.999995	2.17148e-06	0.36393	0.36052
PML	1.5331	0.955195	0.019908	0.36179	0.87256
PMP22	1.1875	0.999995	2.17148e-06	0.6008	0.7443
PMS1	1.9058	0.857565	0.066733	0.23735	0.93056
PMS2	1.4444	0.748843	0.125609	0.13651	0.94203
PNKP	-2.0775	0.712986	0.146919	0.93976	0.15371
PNN	-4.6717	0.125686	0.900713	0.99928	0.0036217
POLA1	-3.7412	0.130855	0.88321	0.99902	0.0046099
POLB	2.6321	0.678	0.16877	0.094653	0.81779
POLD1	-0.064209	0.999995	2.17148e-06	0.65914	0.74255
POLD2	-4.592	0.12411	0.906193	0.99931	0.0034438
POLD3	-3.1246	0.284023	0.546646	0.99119	0.032131
POLD4	1.6767	0.543396	0.264884	0.047971	0.9857
POLE	-6.1118	0.130855	0.88321	0.9844	0.0042344
POLE2	-5.5092	0.119074	0.924183	0.99934	0.003177
POLE3	-0.059628	0.999995	2.17148e-06	0.93221	0.5892
POLE4	-1.0918	0.999995	2.17148e-06	0.86191	0.34611
POLG	-0.5177	0.999995	2.17148e-06	0.21003	0.48739
POLG2	0.28071	0.999995	2.17148e-06	0.81614	0.64279
POLH	0.47886	0.802255	0.0956876	0.16696	0.61497
POLI	1.7544	0.964778	0.0155726	0.37433	0.81323
POLK	2.1956	0.841173	0.0751147	0.21331	0.93439
POLL	0.020817	0.999995	2.17148e-06	0.81216	0.52622
POLM	2.1666	0.712082	0.14747	0.12319	0.72503
POLN	-1.0503	0.999995	2.17148e-06	0.2552	0.3941
POLQ	-0.024814	0.999995	2.17148e-06	0.38496	0.56659
POLR2A	0.79364	0.999995	2.17148e-06	0.59359	0.73032
POLR2B	-5.8917	0.208333	0.681242	0.97325	0.014007
POLR2C	-4.1531	0.384396	0.415221	0.92353	0.054296
POLR2D	-3.4878	0.457985	0.339149	0.97099	0.071362
POLR2E	-6.5774	0.051768	1.28594	0.99992	0.00037057
POLR2F	-5.4665	0.256868	0.59029	0.98065	0.023583
POLR2G	-4.3892	0.3008	0.521722	0.99011	0.035313
POLR2H	-5.0536	0.339573	0.469067	0.77783	0.041677
POLR2I	-1.6751	0.225644	0.646576	0.99559	0.016616
POLR2J	-4.4609	0.384396	0.415221	0.96901	0.055284
POLR2K
POLR2L	-6.2834	0.107446	0.96881	0.99947	0.0026928
POT1	-2.484	0.847829	0.0716917	0.60768	0.20721
PPM1D	-4.2951	0.254464	0.594374	0.99386	0.022545
PPM1G	-4.6059	0.147262	0.831909	0.99847	0.0066258
PPP4C	-4.4585	0.393144	0.405448	0.97155	0.057063
PPP4R1	-1.6155	0.721358	0.141849	0.95018	0.16049
PPP4R2	2.2751	0.842108	0.0746322	0.2148	0.78673
PPP4R4	1.4128	0.988148	0.005178	0.41196	0.87971
PPP5C	1.8295	0.857565	0.066733	0.23392	0.93485
PPP6C	-5.1874	0.107446	0.96881	0.99945	0.0027521
PPP6R1	0.55301	0.999995	2.17148e-06	0.68835	0.69734
PPP6R2	1.0163	0.885103	0.0530062	0.26449	0.55848
PPP6R3	2.709	0.660792	0.179935	0.083319	0.97221
PRDM10	0.93831	0.918843	0.0367587	0.30435	0.45434
PRDM9	2.4348	0.818332	0.0870705	0.17536	0.90418
PRIMPOL	-0.83927	0.999995	2.17148e-06	0.36539	0.33893
PRKCG	0.35371	0.748165	0.126003	0.13494	0.49324
PRKDC
PRMT1	-4.7842	0.384396	0.415221	0.95329	0.053189
PRMT6	1.7742	0.894635	0.0483541	0.2722	0.79024
PRMT8	1.1092	0.999995	2.17148e-06	0.48273	0.29645
PRPF19	-4.3542	0.322958	0.490854	0.94357	0.038603
PSIP1	0.44693	0.999995	2.17148e-06	0.836	0.89025
PSMD14	-3.7545	0.601502	0.220763	0.96934	0.11041
PSME3	-3.0476	0.514741	0.288411	0.98008	0.089317
PTEN	4.1703	0.117063	0.93158	0.00087454	0.99946
PTPN2	1.3434	0.678	0.16877	0.09243	0.97038
PXMP2	1.1248	0.999995	2.17148e-06	0.66362	0.31646
RAD1	-0.17303	0.999995	2.17148e-06	0.88873	0.57999
RAD17	-5.2913	0.205146	0.687937	0.96903	0.012743
RAD18	-0.089977	0.999995	2.17148e-06	0.89394	0.47888
RAD21	-5.0546	0.230967	0.63645	0.99467	0.019966
RAD23A	0.48549	0.999995	2.17148e-06	0.58413	0.71392
RAD23B	0.43499	0.999995	2.17148e-06	0.58718	0.77048
RAD50	-2.2229	0.880687	0.0551784	0.58357	0.21806
RAD51	-5.3429	0.230967	0.63645	0.96828	0.019788
RAD51AP1	1.6097	0.678	0.16877	0.1079	0.96418
RAD51B	-3.4965	0.230967	0.63645	0.99495	0.018899
RAD51C	-2.1731	0.711328	0.14793	0.96852	0.15181
RAD51D	-7.1517	0.032407	1.48936	0.99994	0.00017293
RAD52	0.76736	0.857565	0.066733	0.2359	0.68925
RAD54B	0.69462	0.999995	2.17148e-06	0.64854	0.54603
RAD54L	-1.0141	0.999995	2.17148e-06	0.3731	0.40342
RAD54L2	2.8909	0.143904	0.841927	0.001843	0.99959
RAD9A	-3.0271	0.585607	0.232394	0.87725	0.10562
RAD9B	1.0903	0.999995	2.17148e-06	0.44195	0.8273
RAG1	0.86344	0.999995	2.17148e-06	0.59728	0.88134
RAG2	1.8234	0.613931	0.21188	0.069365	0.97842
RAP1A	0.90918	0.999995	2.17148e-06	0.5253	0.59605
RASSF7	1.5918	0.964778	0.0155726	0.38523	0.91352
RBBP7	-0.54072	0.999995	2.17148e-06	0.97811	0.53157
RBBP8	0.96312	0.999995	2.17148e-06	0.74076	0.71608
RBM7	-1.1667	0.999995	2.17148e-06	0.67551	0.31112
RBX1	-1.0442	0.514741	0.288411	0.74895	0.088813
RECQL	1.3015	0.918843	0.0367587	0.30858	0.63601
RECQL4
RECQL5	1.7813	0.857565	0.066733	0.22701	0.77681
REV1	-1.6158	0.987304	0.0055491	0.80122	0.27353
REV3L	-1.7826	0.420497	0.376237	0.975	0.062379
RFC1	-2.6517	0.765411	0.116105	0.97581	0.17884
RFC2	-7.0191	0.084064	1.07539	0.89994	0.0017046
RFC3	-2.9427	0.681785	0.166353	0.45277	0.1397
RFC4	-3.0122	0.461627	0.335709	0.87272	0.073111
RFC5	-4.2414	0.147262	0.831909	0.80819	0.0063688
RFWD3	0.96517	0.999995	2.17148e-06	0.70198	0.56461
RHNO1	1.31	0.999995	2.17148e-06	0.58914	0.69374
RHO	3.0592	0.457139	0.339952	0.015124	0.87463
RIF1	0.62465	0.999995	2.17148e-06	0.70203	0.81455
RING1	2.1915	0.560827	0.251171	0.05811	0.98238
RINN1
RMI1	-1.9255	0.640887	0.193219	0.95049	0.12517
RMI2	1.2276	0.999995	2.17148e-06	0.60203	0.87154
RNASEH2A	-3.7873	0.508357	0.293831	0.95287	0.086263
RNF10	1.5906	0.999995	2.17148e-06	0.43423	0.65561
RNF111	2.6412	0.513692	0.289297	0.023751	0.99346
RNF113A	-0.23552	0.999995	2.17148e-06	0.50011	0.31437
RNF113B	2.6266	0.513692	0.289297	0.021616	0.99415
RNF126	0.39899	0.999995	2.17148e-06	0.47886	0.447
RNF138	1.4365	0.999995	2.17148e-06	0.45286	0.91275
RNF146	2.949	0.417201	0.379655	0.011577	0.99701
RNF165	1.0987	0.999995	2.17148e-06	0.53667	0.57608
RNF168	0.60238	0.999995	2.17148e-06	0.63434	0.69789
RNF169	2.0079	0.543396	0.264884	0.050679	0.9848
RNF17	1.3842	0.884425	0.053339	0.26335	0.89096
RNF2	-1.1296	0.886092	0.0525212	0.12031	0.22696
RNF20	-2.068	0.21916	0.659239	0.99592	0.015203
RNF4	-0.9422	0.999995	2.17148e-06	0.78981	0.36177
RNF40	-4.031	0.353447	0.451676	0.97257	0.044888
RNF7	2.812	0.530519	0.275299	0.03552	0.26643
RNF8	-0.20821	0.999995	2.17148e-06	0.96322	0.57313
RPA1	-5.6966	0.262329	0.581154	0.99266	0.025757
RPA2	-0.58457	0.269861	0.56886	0.17752	0.028119
RPA3	0.42371	0.999995	2.17148e-06	0.53581	0.44873
RPA4	3.2057	0.513692	0.289297	0.021992	0.6275
RPAIN	-1.8816	0.765411	0.116105	0.91902	0.1789
RPS27L	-0.93334	0.999995	2.17148e-06	0.934	0.34104
RRM1	-7.033	0.006944	2.15839	1	1.4823e-05
RRM2	-4.1546	0.205146	0.687937	0.82834	0.01299
RRM2B	1.61	0.918843	0.0367587	0.30207	0.78931
RTEL1	-3.4206	0.227431	0.64315	0.86794	0.017476
RTF1	-1.2035	0.999995	2.17148e-06	0.79657	0.2841
RTFDC1	-1.2618	0.999995	2.17148e-06	0.38629	0.36215
RUVBL1	-6.1055	0.177411	0.751019	0.99271	0.010035
RUVBL2	-1.8213	0.717458	0.144204	0.86028	0.15711
SAE1	-3.7246	0.367741	0.434458	0.91153	0.0489
SALL4	1.1926	0.999995	2.17148e-06	0.51284	0.89224
SAMHD1	0.7988	0.999995	2.17148e-06	0.72777	0.91072
SCAF11	0.85383	0.999995	2.17148e-06	0.72973	0.92666
SCAF4	-2.3845	0.672089	0.172573	0.67758	0.13413
SCAF8	3.0206	0.168827	0.772558	0.0027027	0.99946
SCAI	1.6317	0.552184	0.257916	0.054217	0.98353
SENP2	0.63582	0.999995	2.17148e-06	0.91165	0.90251
SENP6	-2.7178	0.698812	0.15564	0.80497	0.14468
SENP7	0.008912	0.999995	2.17148e-06	0.95971	0.81246
SENP8	1.1383	0.999995	2.17148e-06	0.53466	0.82654
SERBP1	-0.52717	0.999995	2.17148e-06	0.97038	0.5531
SET	0.35114	0.999995	2.17148e-06	0.9048	0.65678
SETD2	-3.6758	0.367741	0.434458	0.94875	0.049058
SETD8	-2.4677	0.711328	0.14793	0.66238	0.15025
SETDB1	1.9812	0.854656	0.0682087	0.22438	0.93594
SETMAR	-0.87296	0.999995	2.17148e-06	0.70787	0.39015
SETX	1.4402	0.955195	0.019908	0.35675	0.93188
SF3B1	-3.8545	0.384396	0.415221	0.75009	0.055027
SFPQ	0.30292	0.999995	2.17148e-06	0.9437	0.41373
SFR1	0.31918	0.999995	2.17148e-06	0.76648	0.71821
SHFM1	0.64029	0.999995	2.17148e-06	0.64855	0.52983
SHPRH	1.9177	0.543396	0.264884	0.051212	0.98459
SIN3A	-0.933	0.999995	2.17148e-06	0.84751	0.39677
SIRT1	1.2289	0.999995	2.17148e-06	0.44903	0.76263
SIRT2	2.0929	0.747106	0.126618	0.13334	0.8941
SIRT3	1.7684	0.854795	0.068138	0.22533	0.93845
SIRT4	1.7244	0.896229	0.047581	0.27451	0.60024
SIRT5	2.0313	0.886476	0.052333	0.26679	0.67769
SIRT6	1.4934	0.838042	0.0767342	0.20577	0.82389
SIRT7	1.4359	0.920125	0.0361532	0.31955	0.61969
SKIV2L2	-1.6982	0.926459	0.0331738	0.85682	0.24869
SKP1	-4.6359	0.486051	0.313318	0.9669	0.080226
SLBP	-0.16649	0.999995	2.17148e-06	0.76589	0.49551
SLFN11	2.3228	0.712082	0.14747	0.12387	0.80077
SLX1A
SLX4	-0.6136	0.999995	2.17148e-06	0.80353	0.40199
SLX4IP	1.3241	0.875916	0.0575375	0.25685	0.79539
SMARCA2	0.16285	0.999995	2.17148e-06	0.60171	0.5453
SMARCA4	3.2007	0.127525	0.894405	0.0014971	0.99968
SMARCA5	-1.1423	0.999995	2.17148e-06	0.65025	0.31374
SMARCAD1	1.3039	0.857565	0.066733	0.23074	0.43279
SMARCAL1	1.5753	0.964778	0.0155726	0.39127	0.75226
SMARCB1	1.1435	0.958205	0.0185416	0.36917	0.66651
SMARCC2	1.2752	0.999995	2.17148e-06	0.52277	0.90037
SMARCD1	1.742	0.919442	0.0364757	0.31584	0.94983
SMARCE1	2.3485	0.678	0.16877	0.10379	0.94902
SMC1A	-5.7327	0.205146	0.687937	0.99664	0.012683
SMC1B	2.5776	0.613931	0.21188	0.070018	0.94974
SMC2	-6.4817	0.169352	0.77121	0.86426	0.0088887
SMC3	-3.3001	0.384396	0.415221	0.52211	0.055383
SMC4	-5.0279	0.26581	0.575429	0.99269	0.026666
SMC5	-3.434	0.66012	0.180377	0.90071	0.13104
SMC6	-6.1728	0.051768	1.28594	0.99988	0.00054844
SMEK2	1.0291	0.999995	2.17148e-06	0.66532	0.89375
SMG1	-3.705	0.384396	0.415221	0.73998	0.052141
SMG6	-1.457	0.882477	0.0542966	0.78954	0.22089
SMUG1	2.5155	0.678	0.16877	0.1101	0.53053
SOD1	-6.2049	0.147262	0.831909	0.99865	0.0058154
SP100	1.401	0.920125	0.0361532	0.32057	0.55026
SP140	1.7107	0.914855	0.0386477	0.29138	0.91153
SPIDR	0.91242	0.918843	0.0367587	0.3002	0.55579
SPO11	2.5539	0.543396	0.264884	0.048525	0.98544
SPRTN	-0.49134	0.999995	2.17148e-06	0.87414	0.44218
SPTBN1	3.56	0.156415	0.805722	0.002337	0.9995
SSBP1	1.7575	0.923492	0.0345669	0.32426	0.84764
SSBP2	2.2953	0.748843	0.125609	0.13677	0.95933
SSBP3	0.30901	0.999995	2.17148e-06	0.74468	0.72662
SSRP1	-6.0624	0.18287	0.737858	0.99281	0.010539
STAG1	2.2622	0.764759	0.116475	0.14773	0.91984
STAG2	1.173	0.999995	2.17148e-06	0.5707	0.84703
STRA13	1.4748	0.943426	0.0252922	0.34333	0.91036
SUMO1	0.86072	0.999995	2.17148e-06	0.47325	0.5265
SUMO2	-2.2919	0.880687	0.0551784	0.78381	0.21799
SUMO3	2.0063	0.875916	0.0575375	0.25771	0.93911
SUMO4	2.193	0.678	0.16877	0.11031	0.95423
SUPT16H	-2.2852	0.534053	0.272416	0.87333	0.094613
SUPT4H1	-4.5054	0.384396	0.415221	0.92278	0.051964
SUPT5H	-2.7101	0.403616	0.394032	0.80582	0.059444
SUPT6H	-3.4622	0.227431	0.64315	0.99531	0.017367
SUV39H1	-0.16309	0.999995	2.17148e-06	0.898	0.52856
SUV39H2	1.5967	0.999995	2.17148e-06	0.43797	0.73528
SUV420H1	1.3976	0.678	0.16877	0.10577	0.96509
SUV420H2	1.3899	0.919442	0.0364757	0.31449	0.90463
SWI5
Scrambled
TADA2B	1.1611	0.999995	2.17148e-06	0.68839	0.82866
TADA3	-0.30445	0.999995	2.17148e-06	0.5552	0.60688
TAF1	1.1545	0.999995	2.17148e-06	0.69153	0.76761
TAF1L	0.6965	0.999995	2.17148e-06	0.67218	0.35221
TAF6L	2.5293	0.826317	0.0828533	0.19599	0.49743
TAF9	2.3087	0.751508	0.124066	0.14008	0.91912
TAOK2	1.2716	0.875916	0.0575375	0.25502	0.71883
TAOK3	2.1531	0.857565	0.066733	0.24119	0.78009
TCEA1	-0.59643	0.999995	2.17148e-06	0.90729	0.4742
TCEB1
TCEB2	-6.9495	0.023148	1.63549	0.99999	7.4114e-05
TCEB3	-0.034586	0.999995	2.17148e-06	0.71624	0.45449
TCOF1	-3.2687	0.439	0.357535	0.97791	0.066529
TDG	0.5731	0.999995	2.17148e-06	0.85437	0.39375
TDP1	0.99221	0.999995	2.17148e-06	0.69671	0.91333
TDP2	-0.57571	0.999995	2.17148e-06	0.9154	0.3848
TELO2	-4.6555	0.354514	0.450367	0.73842	0.045402
TEN1	-6.1854	0.051768	1.28594	0.99987	0.00060773
TEP1	0.89512	0.999995	2.17148e-06	0.88066	0.73345
TERF1	-3.127	0.446984	0.349708	0.93576	0.068693
TERF2
TERF2IP	1.4228	0.94312	0.025433	0.34027	0.87585
TERT	-3.5181	0.147262	0.831909	0.99834	0.0069222
TET2	2.725	0.44892	0.347831	0.014027	0.99632
TFPT	2.4797	0.613931	0.21188	0.072033	0.83776
THOC1	-0.046347	0.999995	2.17148e-06	0.85382	0.30527
THOC2	-5.0175	0.147262	0.831909	0.99848	0.0065862
THRAP3	2.2748	0.513692	0.289297	0.025767	0.99295
TICRR	-2.5934	0.292771	0.533472	0.99057	0.034038
TIMELESS	-2.336	0.882477	0.0542966	0.97261	0.22246
TINF2	-3.0922	0.461627	0.335709	0.98417	0.073407
TIPIN	-3.2254	0.621861	0.206307	0.94074	0.11747
TNKS	2.1588	0.480105	0.318664	0.018276	0.99509
TNP1	0.93948	0.999995	2.17148e-06	0.48099	0.86751
TONSL	-3.3474	0.225014	0.64779	0.9957	0.016191
TOP1	-1.4989	0.999995	2.17148e-06	0.90174	0.29751
TOP2A	-4.9224	0.147262	0.831909	0.99859	0.0061811
TOP2B	0.72877	0.999995	2.17148e-06	0.73349	0.7461
TOP3A	-1.8719	0.678008	0.168765	0.92974	0.13676
TOP3B	1.4241	0.999995	2.17148e-06	0.43702	0.69409
TOPBP1	-3.6665	0.623855	0.204916	0.96336	0.12056
TOPORS	1.2128	0.999995	2.17148e-06	0.51625	0.52725
TP53	5.1354	0.001543	2.81163	4.9409e-06	0.99984
TP53BP1	1.9454	0.904973	0.0433644	0.28043	0.95877
TP63	1.7137	0.956218	0.0194431	0.36636	0.93831
TP73	1.5105	0.999995	2.17148e-06	0.50559	0.80132
TPP1	0.99619	0.999995	2.17148e-06	0.47279	0.68233
TRAIP	-6.8014	0.051768	1.28594	0.99988	0.00055832
TRAPPC13	0.80647	0.999995	2.17148e-06	0.66575	0.92582
TREX1	0.53117	0.999995	2.17148e-06	0.69914	0.65344
TREX2	1.6194	0.943426	0.0252922	0.34334	0.87176
TRIM28	-1.5564	0.717458	0.144204	0.87067	0.15821
TRIM29	1.4114	0.955195	0.019908	0.36224	0.79299
TRIM34
TRIM65	0.1667	0.999995	2.17148e-06	0.53798	0.46626
TRIP12	3.6706	0.182581	0.738544	0.0031177	0.99768
TRIP13	-1.0654	0.999995	2.17148e-06	0.77064	0.39726
TRRAP	-0.054174	0.999995	2.17148e-06	0.94646	0.51361
TTI1	-4.601	0.130855	0.88321	0.99899	0.0047482
TTI2	-1.1567	0.292771	0.533472	0.99068	0.033761
TYMS	0.94296	0.999995	2.17148e-06	0.6732	0.64852
UBA1	0.0081607	0.999995	2.17148e-06	0.79795	0.49453
UBA2	-6.328	0.130855	0.88321	0.999	0.0046988
UBA3	-0.13887	0.999995	2.17148e-06	0.51221	0.40143
UBB
UBC	1.0687	0.999995	2.17148e-06	0.4591	0.6379
UBE2A	3.9908	0.326196	0.486521	0.0083551	0.99474
UBE2B	1.3544	0.821748	0.0852613	0.18329	0.72594
UBE2C	-7.116	0.03125	1.50515	0.99997	0.0001334
UBE2D1	2.4236	0.707552	0.150242	0.12082	0.93398
UBE2D2	1.9934	0.821748	0.0852613	0.18327	0.89078
UBE2D3	-1.6598	0.956082	0.0195049	0.50969	0.26019
UBE2D4	1.2619	0.999995	2.17148e-06	0.5875	0.55569
UBE2F	4.6124	0.019676	1.70606	8.3995e-05	0.99996
UBE2I	-4.2562	0.224677	0.648441	0.99397	0.015826
UBE2K	3.0058	0.446594	0.350087	0.013345	0.9965
UBE2M	-2.7008	0.384396	0.415221	0.74683	0.053396
UBE2N	0.40775	0.999995	2.17148e-06	0.75123	0.67843
UBE2NL
UBE2R2	1.9955	0.786531	0.104284	0.16117	0.94503
UBE2S	-1.4741	0.824791	0.0836561	0.89585	0.19894
UBE2T	-4.7693	0.269861	0.56886	0.83197	0.028326
UBE2U	2.2196	0.822142	0.0850532	0.19128	0.71848
UBE2V1
UBE2V2	0.68772	0.999995	2.17148e-06	0.50287	0.69695
UBE2W	0.76445	0.999995	2.17148e-06	0.68595	0.74572
UBR5	0.23183	0.999995	2.17148e-06	0.95485	0.3443
UCHL3	1.5052	0.918843	0.0367587	0.3008	0.74041
UCHL5	-0.94843	0.816646	0.0879662	0.5632	0.19539
UHRF1
UHRF2	-0.014048	0.999995	2.17148e-06	0.55719	0.51384
UIMC1	1.3785	0.999995	2.17148e-06	0.5276	0.93297
UNG	1.8578	0.480105	0.318664	0.017476	0.89976
UPF1	0.34684	0.999995	2.17148e-06	0.8858	0.7706
USP1	-1.249	0.999995	2.17148e-06	0.59703	0.34427
USP10	-4.5421	0.230967	0.63645	0.99476	0.019363
USP11	1.5322	0.838042	0.0767342	0.20844	0.84466
USP13	0.96556	0.999995	2.17148e-06	0.48855	0.87418
USP14	2.131	0.63763	0.195431	0.077014	0.94044
USP15	1.9127	0.861232	0.0648798	0.24541	0.33597
USP20	2.4719	0.526944	0.278236	0.027051	0.92222
USP22	0.63315	0.916713	0.0377666	0.29402	0.44501
USP26	1.2849	0.976743	0.0102197	0.40029	0.75756
USP28	3.6803	0.23894	0.621711	0.0045901	0.99367
USP3	0.71046	0.999995	2.17148e-06	0.59007	0.84543
USP34	0.52411	0.857565	0.066733	0.24253	0.40602
USP37	-1.1625	0.894337	0.0484988	0.95871	0.23766
USP4	-0.010781	0.999995	2.17148e-06	0.81362	0.76067
USP44	0.84567	0.999995	2.17148e-06	0.61146	0.70521
USP45	1.4337	0.999995	2.17148e-06	0.5023	0.8548
USP47	3.0719	0.480105	0.318664	0.01882	0.84885
USP48	1.468	0.999995	2.17148e-06	0.47562	0.73087
USP5	-4.9092	0.098274	1.00756	0.99905	0.0022481
USP51	1.5937	0.989713	0.00449073	0.41405	0.88566
USP7	-4.3024	0.230967	0.63645	0.99469	0.019788
UVRAG	-0.65139	0.999995	2.17148e-06	0.96615	0.52164
UVSSA	1.9074	0.560827	0.251171	0.057586	0.89344
VCP	-1.3189	0.747794	0.126218	0.9786	0.16919
WAPAL	-1.2418	0.999995	2.17148e-06	0.92892	0.30708
WDR48	-0.060412	0.999995	2.17148e-06	0.21818	0.53533
WDR70	-1.8522	0.282937	0.54831	0.96794	0.031627
WDR76	1.5203	0.998192	0.000785915	0.42293	0.8788
WEE1	-4.5552	0.227431	0.64315	0.96598	0.017061
WHSC1	0.035959	0.9121	0.0399575	0.28716	0.54963
WRAP53	-3.3634	0.513802	0.289204	0.86476	0.087736
WRN	0.99167	0.999995	2.17148e-06	0.68289	0.73277
WRNIP1	2.9084	0.530519	0.275299	0.038722	0.9572
XAB2	-5.6175	0.265482	0.575965	0.96733	0.02635
XPA	0.12956	0.999995	2.17148e-06	0.7939	0.5838
XPC	0.67458	0.999995	2.17148e-06	0.80432	0.83959
XRCC1	0.038702	0.999995	2.17148e-06	0.80309	0.8247
XRCC2	-0.036515	0.999995	2.17148e-06	0.91497	0.61246
XRCC3	-5.788	0.147262	0.831909	0.85303	0.0071297
XRCC4	1.0366	0.999995	2.17148e-06	0.50521	0.64962
XRCC5	-1.679	0.894337	0.0484988	0.86702	0.2319
XRCC6	-3.928	0.269861	0.56886	0.99204	0.028801
XRCC6BP1	1.1878	0.857565	0.066733	0.22917	0.69505
YBX1	-1.4751	0.894337	0.0484988	0.97879	0.23484
YTHDF2	0.70835	0.999995	2.17148e-06	0.71038	0.6788
ZBTB2	0.30979	0.999995	2.17148e-06	0.6437	0.3261
ZBTB32	1.256	0.999995	2.17148e-06	0.43698	0.81676
ZDHHC16	0.9501	0.999995	2.17148e-06	0.58461	0.85389
ZMPSTE24	-0.66611	0.999995	2.17148e-06	0.9618	0.49684
ZMYM3	2.2767	0.815257	0.0887055	0.17314	0.90729
ZMYND8	-1.7178	0.681785	0.166353	0.44119	0.1397
ZNF451	0.93194	0.999995	2.17148e-06	0.45338	0.82574
ZNF827	1.9758	0.857565	0.066733	0.23921	0.94544
ZRANB3	0.73938	0.999995	2.17148e-06	0.5625	0.83334
ZSWIM7	0.9867	0.999995	2.17148e-06	0.56118	0.83926

## Sheet: Noordermeer, TP53-KO
Gene	lfc	fdr	fdr_log10	pos_p	neg_p
ABL1	0.6162	0.897342	0.047042	0.27478	0.68342
ACD	-0.6079	0.866995	0.0619834	0.95871	0.24294
ACTL6A	-2.293	0.27596	0.559154	0.9847	0.039825
ACTR5	-0.93288	0.189186	0.723111	0.99465	0.020049
ACTR8	-1.0334	0.377741	0.422806	0.95487	0.070177
ADH5	0.25768	0.999995	2.17148e-06	0.46905	0.69355
AICDA	0.46144	0.907049	0.0423693	0.28812	0.93086
AKAP8	0.89986	0.673316	0.171781	0.067692	0.86663
ALDH2	0.27392	0.999995	2.17148e-06	0.38575	0.51406
ALKBH1	-0.11051	0.999995	2.17148e-06	0.73073	0.78921
ALKBH2	0.17897	0.999995	2.17148e-06	0.76339	0.83024
ALKBH3	0.043295	0.999995	2.17148e-06	0.63173	0.87296
AMN1	0.81857	0.169092	0.771877	0.0037978	0.98924
ANKRD28	0.32582	0.999995	2.17148e-06	0.55112	0.69453
ANKRD32	0.55718	0.864125	0.0634234	0.21702	0.94111
ANKRD44	0.089335	0.919398	0.0364964	0.31171	0.85483
ANKRD52	-1.2913	0.239172	0.62129	0.99165	0.030516
ANP32E	-0.48077	0.999995	2.17148e-06	0.80448	0.40335
APAF1	0.44371	0.889932	0.0506432	0.23731	0.97448
APBB1	0.62148	0.817894	0.087303	0.19264	0.87552
APC	0.53722	0.817894	0.087303	0.15921	0.78214
APEX1	0.11111	0.999995	2.17148e-06	0.56483	0.84526
APEX2	0.087087	0.999995	2.17148e-06	0.80727	0.83198
APITD1
APLF	0.55447	0.745649	0.127466	0.10358	0.94573
APOBEC1	0.53593	0.890337	0.0504456	0.24196	0.94461
APOBEC2	0.36053	0.971009	0.0127767	0.34479	0.95709
APOBEC3A	1.3321	0.086516	1.0629	0.0012923	0.99972
APOBEC3B	0.59932	0.809503	0.0917815	0.12721	0.91468
APOBEC3C	0.099266	0.999995	2.17148e-06	0.61175	0.73816
APOBEC3D	0.14682	0.999995	2.17148e-06	0.54763	0.92288
APOBEC3F	0.025973	0.811504	0.0907093	0.14701	0.41301
APOBEC3G	-0.12203	0.999995	2.17148e-06	0.66841	0.82661
APOBEC3H	0.71053	0.289875	0.537789	0.0096108	0.99756
APTX	-0.39935	0.999995	2.17148e-06	0.83846	0.47353
ARID1A	0.8094	0.745649	0.127466	0.10219	0.83691
ARID1B	-0.70063	0.689936	0.161191	0.98175	0.16898
ARID2	-0.2156	0.999995	2.17148e-06	0.80432	0.43275
ASCC1	0.56923	0.911659	0.0401676	0.29744	0.57055
ASF1A	0.12018	0.999995	2.17148e-06	0.48511	0.65208
ASF1B	0.55861	0.940864	0.0264731	0.32402	0.92134
ASH1L	0.325	0.999995	2.17148e-06	0.53792	0.8859
ASH2L	-0.55327	0.999995	2.17148e-06	0.42907	0.36337
ATAD5	-0.79259	0.596241	0.224578	0.7383	0.13838
ATF2	0.33732	0.892575	0.0493553	0.25604	0.94363
ATM	0.10464	0.999995	2.17148e-06	0.64584	0.66578
ATMIN	-0.75137	0.441482	0.355087	0.96385	0.087517
ATR	-0.65973	0.863116	0.0639308	0.66976	0.24093
ATRIP	-0.61055	0.999995	2.17148e-06	0.68765	0.37577
ATRX	-1.8158	0.3876	0.411616	0.64344	0.07296
ATXN3	0.45379	0.817894	0.087303	0.16224	0.95752
ATXN7	0.20901	0.999995	2.17148e-06	0.79225	0.78803
AUNIP	-0.075355	0.999995	2.17148e-06	0.54921	0.80792
BABAM1	1.192	0.086516	1.0629	0.00085661	0.99869
BAP1	-1.0912	0.183577	0.736182	0.99499	0.018652
BARD1	-0.91938	0.778167	0.108927	0.075564	0.20807
BAZ1A	1.0933	0.169686	0.770354	0.0041741	0.90848
BAZ1B	0.027899	0.999995	2.17148e-06	0.79523	0.69693
BCAS2	-1.7869	0.083826	1.07662	0.99911	0.0042137
BCCIP	-0.97898	0.417046	0.379816	0.82523	0.081239
BCLAF1	-0.76667	0.714096	0.146243	0.89637	0.18372
BEND3	0.93583	0.583817	0.233723	0.037082	0.9896
BLM	0.29567	0.999995	2.17148e-06	0.50864	0.81529
BMI1	0.42228	0.892575	0.0493553	0.25775	0.58911
BOD1L1	-1.389	0.714096	0.146243	0.97833	0.18132
BPTF	-1.5173	0.189186	0.723111	0.9947	0.019662
BRAP	0.21601	0.809503	0.0917815	0.12837	0.57952
BRAT1	-3.3167	0.124506	0.90481	0.9913	0.0098089
BRCA1	-0.30382	0.999995	2.17148e-06	0.94503	0.4799
BRCA2	-0.42214	0.999995	2.17148e-06	0.93719	0.56179
BRCC3	0.52779	0.817894	0.087303	0.18372	0.75437
BRD1	0.31105	0.999995	2.17148e-06	0.3849	0.5872
BRD2	-1.9522	0.239172	0.62129	0.85991	0.030793
BRD4	-2.3979	0.064931	1.18755	0.99919	0.0023024
BRD7	0.23056	0.999995	2.17148e-06	0.81613	0.65882
BRD8	-2.2184	0.271359	0.566456	0.98534	0.038141
BRDT	0.033807	0.999995	2.17148e-06	0.79678	0.72688
BRE	0.5702	0.811504	0.0907093	0.14035	0.94949
BRIP1	-0.14184	0.999995	2.17148e-06	0.59824	0.58757
BTG2	0.73957	0.620885	0.206989	0.053164	0.89337
BUB1B	-1.6779	0.67794	0.168809	0.93149	0.16169
C10orf12	-0.15045	0.999995	2.17148e-06	0.90653	0.71798
C11orf30	0.24141	0.998093	0.00082899	0.37398	0.78489
C15orf41	-1.9969	0.681698	0.166408	0.93312	0.16504
C17orf70	-0.25799	0.999995	2.17148e-06	0.17575	0.63219
C19orf40	-0.12285	0.999995	2.17148e-06	0.93408	0.64607
C1orf115	0.64436	0.844156	0.0735773	0.20585	0.89823
C1orf86	-0.61241	0.681698	0.166408	0.4325	0.1655
C20orf196	0.37431	0.999995	2.17148e-06	0.46171	0.92225
C4orf27	-0.1429	0.999995	2.17148e-06	0.34615	0.41257
C7orf49	0.42916	0.892575	0.0493553	0.25554	0.47347
C9orf142	0.45581	0.817894	0.087303	0.1941	0.74661
CAND1	2.6355	0.002315	2.63545	4.9515e-06	1
CASP3	0.30067	0.889932	0.0506432	0.23969	0.96443
CBX1	-0.2293	0.999995	2.17148e-06	0.69474	0.46896
CBX3	0.36556	0.998093	0.00082899	0.37392	0.74506
CBX4	0.46561	0.817894	0.087303	0.18171	0.96142
CBX5	0.20139	0.999995	2.17148e-06	0.5965	0.90932
CCDC101	-0.4937	0.734237	0.134164	0.97656	0.19351
CCNA1	0.70584	0.817894	0.087303	0.19151	0.89753
CCNA2	-3.2041	0.064931	1.18755	0.99953	0.0021737
CCNB1	-0.47466	0.999995	2.17148e-06	0.93734	0.44385
CCNB2	0.55881	0.745649	0.127466	0.10488	0.92561
CCNB3	1.3152	0.406687	0.39074	0.019573	0.74346
CCNC	0.91755	0.583817	0.233723	0.039448	0.98888
CCND1	-3.6101	0.033565	1.47411	0.99996	0.00014359
CCND2	0.6522	0.809503	0.0917815	0.13181	0.74511
CCND3	-0.14347	0.999995	2.17148e-06	0.80924	0.58285
CCNE1	0.14358	0.817894	0.087303	0.16735	0.83958
CCNH	-1.1433	0.590461	0.228809	0.94018	0.13577
CCNO	-0.23335	0.999995	2.17148e-06	0.53374	0.4392
CDC25A	0.035854	0.999995	2.17148e-06	0.89674	0.65654
CDC25B	0.086006	0.999995	2.17148e-06	0.5872	0.75454
CDC34	0.49292	0.771999	0.112383	0.11312	0.96771
CDC5L	-3.5931	0.06239	1.20489	0.9997	0.0014013
CDC7	-1.9141	0.120572	0.918754	0.99795	0.008264
CDCA5	-0.76011	0.722203	0.141341	0.86463	0.18847
CDK1	-2.8801	0.120572	0.918754	0.9978	0.0088978
CDK12	-0.21229	0.999995	2.17148e-06	0.91851	0.47712
CDK2	-0.65207	0.543056	0.265155	0.91211	0.12197
CDK4	-2.4335	0.124695	0.904151	0.99651	0.010136
CDK7	-2.9162	0.09838	1.00709	0.99591	0.0054714
CDK8	0.64833	0.817894	0.087303	0.17437	0.90915
CDK9	-3.5428	0.090042	1.04555	0.99898	0.0047188
CDKL5	0.30844	0.999995	2.17148e-06	0.75824	0.91874
CDKN1A	-0.076918	0.999995	2.17148e-06	0.69626	0.75759
CDKN1B	1.109	0.086516	1.0629	0.0014805	0.99969
CDKN2A	0.96671	0.282253	0.549361	0.0090562	0.99772
CDKN2D	0.63933	0.811504	0.0907093	0.14262	0.88631
CEP164	-0.15036	0.999995	2.17148e-06	0.94612	0.51067
CEP57	-0.58613	0.999995	2.17148e-06	0.4565	0.32031
CEP63	-0.15686	0.999995	2.17148e-06	0.84552	0.74112
CETN2	-0.44118	0.999995	2.17148e-06	0.94178	0.42725
CHAF1A	-0.69777	0.999995	2.17148e-06	0.82189	0.35133
CHAF1B	-2.89	0.23615	0.626812	0.98862	0.029773
CHD1L	0.50852	0.911659	0.0401676	0.29836	0.94411
CHD3	0.31595	0.999995	2.17148e-06	0.48435	0.69842
CHD4
CHEK1	-4.2475	0.079207	1.10124	0.99917	0.0038968
CHEK2	0.093386	0.999995	2.17148e-06	0.82029	0.77418
CHFR	0.52594	0.913972	0.0390671	0.30401	0.55861
CHRAC1	0.28367	0.999995	2.17148e-06	0.55361	0.74428
CHTF18	-0.31405	0.999995	2.17148e-06	0.51605	0.45595
CIB1	-0.5279	0.999995	2.17148e-06	0.696	0.6379
CLK2	-0.49237	0.90451	0.0435866	0.66215	0.2612
CLSPN	-0.54059	0.999995	2.17148e-06	0.58382	0.34205
CNOT4	0.26871	0.87101	0.0599769	0.22078	0.84592
CNOT7	0.96009	0.769787	0.113629	0.11115	0.93557
COL1A1	-0.05424	0.999995	2.17148e-06	0.19817	0.85102
COL21A1	0.20549	0.817894	0.087303	0.1937	0.7572
COPS2	-0.51941	0.999995	2.17148e-06	0.088765	0.3059
COPS3	-0.86405	0.319822	0.495092	0.98493	0.050084
COPS4	-0.62036	0.999995	2.17148e-06	0.94836	0.35961
COPS5	-1.7741	0.217176	0.663188	0.99035	0.025782
COPS6	-1.8095	0.324401	0.488918	0.98289	0.053372
COPS7A	0.52074	0.664028	0.177814	0.06579	0.91235
COPS7B	0.10876	0.999995	2.17148e-06	0.60427	0.65859
COPS8	-0.33777	0.999995	2.17148e-06	0.89196	0.41576
CREBBP	0.46503	0.817894	0.087303	0.15943	0.60663
CRY1	0.23228	0.999995	2.17148e-06	0.44583	0.85539
CRY2	0.31729	0.999995	2.17148e-06	0.51618	0.7239
CSNK1D	0.5364	0.911659	0.0401676	0.296	0.87439
CSNK1E	-0.22702	0.999995	2.17148e-06	0.21053	0.69491
CSNK2A1	-0.34338	0.507512	0.294554	0.45227	0.11073
CSNK2A2	-1.5911	0.120572	0.918754	0.99785	0.00867
CSNK2B	-1.5463	0.324401	0.488918	0.98395	0.053313
CTC1	-2.2861	0.084394	1.07369	0.99786	0.0043325
CTCF	-1.2028	0.651144	0.186323	0.28951	0.15389
CUL1	-0.47226	0.999995	2.17148e-06	0.78469	0.42696
CUL2	-1.1115	0.365963	0.436563	0.71163	0.065364
CUL3	0.68085	0.356847	0.447518	0.014503	0.99538
CUL4A	0.91814	0.392011	0.406702	0.018028	0.99514
CUL4B	-0.86456	0.651144	0.186323	0.8918	0.15391
CUL5	1.0672	0.391645	0.407107	0.017573	0.91856
CUL7	0.088181	0.999995	2.17148e-06	0.7136	0.9298
CUL9	0.51601	0.745649	0.127466	0.10552	0.89965
CXXC1	-0.12834	0.999995	2.17148e-06	0.51578	0.73094
CXorf57	0.86077	0.169092	0.771877	0.0036789	0.99927
DAXX	-0.15644	0.999995	2.17148e-06	0.40073	0.47882
DBF4	-0.62566	0.714096	0.146243	0.89466	0.17835
DCAF11	-0.24857	0.999995	2.17148e-06	0.88906	0.50797
DCLRE1A	0.21236	0.999995	2.17148e-06	0.55095	0.87134
DCLRE1B	-1.589	0.584268	0.233388	0.93002	0.1331
DCLRE1C	0.80858	0.709362	0.149132	0.08312	0.69516
DCUN1D1	0.38605	0.999995	2.17148e-06	0.50631	0.94817
DCUN1D2	-0.036397	0.999995	2.17148e-06	0.54562	0.79104
DCUN1D3	1.1207	0.087706	1.05697	0.0016885	0.99963
DCUN1D4	0.68101	0.809503	0.0917815	0.1316	0.97946
DCUN1D5	0.58464	0.809503	0.0917815	0.12659	0.86194
DDB1	-2.2221	0.333304	0.477159	0.93368	0.056689
DDB2
DDX1	-2.758	0.225455	0.64694	0.83664	0.027763
DDX11	-1.6321	0.324401	0.488918	0.79553	0.053788
DICER1	-2.3018	0.256234	0.591363	0.18042	0.034527
DKC1	-4.334	0.129095	0.889091	0.98859	0.010769
DLGAP5	0.34948	0.999995	2.17148e-06	0.54162	0.87037
DMC1	0.65287	0.897342	0.047042	0.2812	0.90129
DNA2	-2.0145	0.256234	0.591363	0.98666	0.034626
DNAJC2	-1.9145	0.505228	0.296513	0.98315	0.10861
DNMT1	0.298	0.999995	2.17148e-06	0.5992	0.932
DNTT	-0.038765	0.999995	2.17148e-06	0.33521	0.84147
DPY30	-1.0946	0.587595	0.230922	0.80612	0.13449
DROSHA	-0.97305	0.714096	0.146243	0.96542	0.17893
DSCC1	-0.97823	0.221126	0.65536	0.99264	0.026961
DTX1	0.75019	0.588097	0.230551	0.042914	0.69586
DTX2	-0.029341	0.999995	2.17148e-06	0.52008	0.4518
DTX3	0.19039	0.999995	2.17148e-06	0.53912	0.89442
DTX3L	0.18092	0.999995	2.17148e-06	0.75518	0.92547
DTX4	0.19267	0.999995	2.17148e-06	0.39258	0.91291
DUT	-0.43411	0.999995	2.17148e-06	0.79331	0.31426
DYNLL1	-1.1908	0.362422	0.440785	0.9364	0.064344
ECT2	-1.7402	0.564398	0.248415	0.98272	0.12737
EEPD1	0.90183	0.456633	0.340433	0.02393	0.98732
EID3	0.5948	0.811504	0.0907093	0.14855	0.76035
EIF4A1	-1.9428	0.169412	0.771056	0.99584	0.015582
EME1	-0.57253	0.795506	0.0993565	0.65125	0.21368
EME2	0.46351	0.817894	0.087303	0.19786	0.93368
ENDOV	-0.094089	0.999995	2.17148e-06	0.51864	0.43465
ENY2	-0.099943	0.999995	2.17148e-06	0.56254	0.44805
EP300	0.21199	0.999995	2.17148e-06	0.43514	0.78947
EP400
ERCC1	-0.52035	0.927202	0.0328256	0.67055	0.26973
ERCC2	-0.99277	0.377741	0.422806	0.85016	0.070296
ERCC3	-1.9021	0.324401	0.488918	0.78152	0.053956
ERCC4	-0.28735	0.999995	2.17148e-06	0.93454	0.45863
ERCC5	-0.44813	0.999995	2.17148e-06	0.46327	0.41161
ERCC6	0.60145	0.897342	0.047042	0.28038	0.72104
ERCC6L	-1.4417	0.319822	0.495092	0.98491	0.050282
ERCC6L2	-0.0558	0.999995	2.17148e-06	0.62628	0.78449
ERCC8	0.14039	0.999995	2.17148e-06	0.46638	0.83008
ESCO2	-1.3142	0.308234	0.511119	0.9864	0.046113
ETAA1	0.82796	0.732863	0.134977	0.097004	0.9599
EXD2	0.20313	0.999995	2.17148e-06	0.69405	0.83725
EXO1	-0.20168	0.999995	2.17148e-06	0.73921	0.7941
EXO5	-1.0944	0.654008	0.184417	0.97682	0.15528
EYA1	0.036243	0.999995	2.17148e-06	0.65375	0.70871
EYA2	0.70201	0.664028	0.177814	0.065196	0.82916
EYA3	-0.37239	0.999995	2.17148e-06	0.77947	0.66077
EYA4	0.20283	0.999995	2.17148e-06	0.51767	0.6661
EZH2	0.087479	0.999995	2.17148e-06	0.7868	0.75958
FAF1	-0.080132	0.999995	2.17148e-06	0.76492	0.90095
FAM122A	-0.26334	0.999995	2.17148e-06	0.6598	0.64377
FAM175A	-0.34768	0.999995	2.17148e-06	0.61716	0.52003
FAM175B	1.266	0.02662	1.57479	0.00011388	0.99997
FAM178A	-0.40846	0.999995	2.17148e-06	0.96655	0.57662
FAM35A	-0.1702	0.999995	2.17148e-06	0.87732	0.5403
FAN1	0.45175	0.817894	0.087303	0.17512	0.81267
FANCA	0.49063	0.783744	0.105826	0.11903	0.97527
FANCB	-0.030692	0.999995	2.17148e-06	0.69672	0.67162
FANCC	-0.060437	0.999995	2.17148e-06	0.60829	0.65053
FANCD2	-0.21189	0.999995	2.17148e-06	0.95031	0.77484
FANCE	0.80885	0.817894	0.087303	0.18989	0.93476
FANCF	0.22063	0.999995	2.17148e-06	0.4914	0.81398
FANCG	1.2818	0.470833	0.327133	0.025178	0.97479
FANCI	0.85755	0.583817	0.233723	0.041835	0.98386
FANCL	0.75944	0.890337	0.0504456	0.24401	0.88832
FANCM	0.40261	0.919398	0.0364964	0.31011	0.96583
FBXO18	0.40749	0.980095	0.00873183	0.35713	0.73236
FBXO22	0.47285	0.817894	0.087303	0.19449	0.90447
FBXW7	1.844	0.086516	1.0629	0.00067835	0.99973
FEN1	-2.0514	0.193421	0.713496	0.88933	0.021514
FIGNL1	-0.22333	0.999995	2.17148e-06	0.83571	0.55145
FOXM1	-0.56376	0.999995	2.17148e-06	0.98011	0.49408
FOXN3	0.63111	0.588776	0.23005	0.045153	0.97826
FOXO3	1.0361	0.588776	0.23005	0.046153	0.93245
FZR1	-0.90763	0.681698	0.166408	0.97926	0.16419
GABBR1	-0.351	0.999995	2.17148e-06	0.41085	0.52412
GADD45A	0.14781	0.999995	2.17148e-06	0.50473	0.71019
GADD45G	0.68147	0.538973	0.268433	0.031397	0.93798
GAR1	-0.80364	0.734237	0.134164	0.22816	0.19396
GEN1	0.20371	0.999995	2.17148e-06	0.4748	0.88719
GLG1	0.32708	0.912112	0.0399518	0.3003	0.6773
GPI	-0.63461	0.171195	0.766509	0.99558	0.016513
GPS1	-1.1984	0.319822	0.495092	0.74321	0.050084
GTF2H1	-1.2927	0.523864	0.280781	0.96204	0.11598
GTF2H2
GTF2H3	-1.8429	0.366375	0.436074	0.97358	0.06583
GTF2H4	-1.756	0.124506	0.90481	0.99743	0.0099673
GTF2H5	-0.61475	0.90451	0.0435866	0.8581	0.26115
H2AFX	0.48918	0.87101	0.0599769	0.2222	0.94008
H2AFY	0.88974	0.218839	0.659875	0.0060854	0.9986
H2AFY2	0.52346	0.875984	0.0575038	0.22485	0.87084
H2AFZ	0.71358	0.641419	0.192858	0.058997	0.97852
H3F3A
H3F3B	0.23867	0.999995	2.17148e-06	0.57274	0.85092
HDAC1	0.43494	0.817894	0.087303	0.16505	0.88438
HDAC10	0.35369	0.893484	0.0489132	0.25897	0.89538
HDAC2	0.015517	0.999995	2.17148e-06	0.67652	0.76337
HDAC3	-6.4359	0.046717	1.33053	0.99982	0.00054961
HDAC4	0.50415	0.891532	0.0498631	0.24887	0.89479
HDAC9	0.049322	0.999995	2.17148e-06	0.5393	0.88298
HELB	0.06409	0.999995	2.17148e-06	0.55992	0.81526
HELLS	-0.31053	0.999995	2.17148e-06	0.91893	0.59702
HELQ	0.19778	0.889932	0.0506432	0.23452	0.88986
HERC2	0.52711	0.709362	0.149132	0.085804	0.96447
HES1	1.3836	0.408112	0.389221	0.020078	0.93369
HFM1	0.031603	0.999995	2.17148e-06	0.83726	0.65492
HINFP	-3.9873	0.06239	1.20489	0.99972	0.0013518
HIPK1	0.78494	0.815517	0.088567	0.15455	0.94846
HIPK2	0.52393	0.919398	0.0364964	0.31097	0.89405
HLTF	0.5046	0.864125	0.0634234	0.21719	0.8681
HMGA1	0.29815	0.999995	2.17148e-06	0.56399	0.76556
HMGA2	0.47362	0.817894	0.087303	0.18342	0.89406
HMGB1
HMGB2	0.89169	0.769787	0.113629	0.11113	0.9652
HMGN1	0.69509	0.706528	0.150871	0.075317	0.92595
HNRNPK	-1.5383	0.324401	0.488918	0.96165	0.054125
HNRNPUL1	0.2293	0.999995	2.17148e-06	0.61114	0.5876
HNRNPUL2	0.1833	0.999995	2.17148e-06	0.41892	0.70631
HPRT1	0.29813	0.912112	0.0399518	0.30112	0.87923
HUS1	-0.98664	0.714096	0.146243	0.9686	0.18406
HUS1B	0.73325	0.651989	0.18576	0.061037	0.90285
HUWE1	-0.95715	0.210227	0.677312	0.9932	0.024733
ID3	-0.31745	0.999995	2.17148e-06	0.55331	0.5166
IGHMBP2	-0.96521	0.396249	0.402032	0.96873	0.075436
ING4	-0.0063877	0.999995	2.17148e-06	0.4307	0.81878
INO80	-0.99249	0.171195	0.766509	0.99569	0.016206
INO80B	-0.55619	0.859148	0.065932	0.96343	0.23615
INO80C	-0.22037	0.999995	2.17148e-06	0.35287	0.36239
INO80D	0.087944	0.999995	2.17148e-06	0.63105	0.94082
INO80E	0.67727	0.583817	0.233723	0.041776	0.91391
IP6K3	0.054969	0.999995	2.17148e-06	0.87364	0.71577
KAT2A	0.18099	0.999995	2.17148e-06	0.48261	0.72649
KAT2B	0.49428	0.745649	0.127466	0.10579	0.66522
KAT5	-1.4889	0.171195	0.766509	0.99557	0.016582
KAT8	-1.6897	0.102289	0.990171	0.99865	0.0057982
KDM1A	0.77029	0.709362	0.149132	0.084457	0.91019
KDM2A	-1.6031	0.171195	0.766509	0.99556	0.016662
KDM4A	-0.75039	0.705001	0.15181	0.63331	0.17493
KDM4D	-0.19126	0.999995	2.17148e-06	0.75578	0.74988
KDM5A	0.88332	0.086516	1.0629	0.001322	0.99972
KEAP1	1.4161	0.145955	0.835781	0.0029659	0.87214
KIAA1586	0.19612	0.999995	2.17148e-06	0.77762	0.70075
KLHL15	1.0255	0.169402	0.771081	0.0039859	0.99915
KMT2A	-1.5987	0.50883	0.293427	0.98295	0.11156
L3MBTL1	0.31971	0.999995	2.17148e-06	0.56033	0.97876
LATS1	0.27296	0.911659	0.0401676	0.29637	0.87391
LATS2	1.9484	0.002315	2.63545	4.9515e-06	1
LIG1	0.47643	0.897342	0.047042	0.2676	0.93165
LIG3	-0.22425	0.999995	2.17148e-06	0.97163	0.56393
LIG4	-0.0019551	0.999995	2.17148e-06	0.35903	0.8394
LMNA	-1.6941	0.189186	0.723111	0.99441	0.020841
Luciferase
MAD2L2	-0.15974	0.999995	2.17148e-06	0.59309	0.3285
MAPK14	-0.099856	0.999995	2.17148e-06	0.81801	0.6985
MAPK8	0.33122	0.999995	2.17148e-06	0.47687	0.68101
MAPKAPK2	-0.62619	0.90451	0.0435866	0.58776	0.26082
MARK3	-0.13434	0.999995	2.17148e-06	0.52051	0.49887
MASTL	-5.5733	0.064931	1.18755	0.9987	0.0027481
MAU2	-1.6051	0.3876	0.411616	0.98153	0.072584
MB21D1	0.45741	0.811504	0.0907093	0.14423	0.77209
MBD4	0.65281	0.745649	0.127466	0.10607	0.76564
MBTD1	0.34798	0.999995	2.17148e-06	0.47118	0.90971
MCM10	-0.55218	0.999995	2.17148e-06	0.69376	0.59566
MCM2	-2.2177	0.064931	1.18755	0.9995	0.0023718
MCM3	-3.0122	0.070521	1.15168	0.99933	0.0032432
MCM3AP	-1.0122	0.476319	0.322102	0.95748	0.097301
MCM4	-1.9678	0.09838	1.00709	0.99879	0.0053724
MCM5	-1.1092	0.377741	0.422806	0.75102	0.06993
MCM6	-3.1023	0.112021	0.950701	0.99846	0.0066696
MCM7	-0.80024	0.999995	2.17148e-06	0.64662	0.36949
MCM8	-0.34735	0.999995	2.17148e-06	0.4992	0.53034
MCM9	0.43602	0.897342	0.047042	0.27684	0.97908
MCPH1	-1.3648	0.183577	0.736182	0.99298	0.018523
MCRS1	0.36589	0.999995	2.17148e-06	0.52878	0.58062
MDC1	0.45395	0.896044	0.0476707	0.26354	0.72909
MDM2	-0.19976	0.999995	2.17148e-06	0.83101	0.5998
MDM4	0.16106	0.999995	2.17148e-06	0.7716	0.89305
MEN1	-2.0483	0.048225	1.31673	0.99986	0.00061893
METTL3	-1.4824	0.483594	0.315519	0.90326	0.10086
MGMT	-0.028332	0.999995	2.17148e-06	0.85736	0.70698
MLH1	-0.064828	0.999995	2.17148e-06	0.37494	0.76893
MLH3	0.18659	0.999995	2.17148e-06	0.40675	0.63833
MMS19	-1.9962	0.48604	0.313328	0.92361	0.10189
MMS22L	-1.7251	0.189186	0.723111	0.99233	0.020722
MNAT1	-1.0296	0.90451	0.0435866	0.92334	0.25896
MORF4L1	0.48179	0.988239	0.00513801	0.36479	0.71756
MORF4L2	0.28603	0.974394	0.0112654	0.35328	0.89062
MPG	0.30426	0.999995	2.17148e-06	0.44476	0.96714
MPLKIP	0.083872	0.998098	0.000826815	0.37682	0.92456
MPZ	0.26771	0.999995	2.17148e-06	0.56303	0.8935
MRE11A	-2.1358	0.360354	0.443271	0.85295	0.063245
MSH2	-1.205	0.714096	0.146243	0.89153	0.18291
MSH3	-0.14735	0.999995	2.17148e-06	0.7657	0.64412
MSH4	0.57818	0.897342	0.047042	0.27962	0.95535
MSH5	0.25917	0.972485	0.0121171	0.34843	0.77727
MSH6	-0.34411	0.999995	2.17148e-06	0.84355	0.3554
MTA1	-0.11898	0.999995	2.17148e-06	0.76138	0.70824
MTA2	-0.4063	0.999995	2.17148e-06	0.51457	0.39467
MTA3	0.56099	0.732863	0.134977	0.097193	0.86404
MTOR	-3.2705	0.058951	1.22951	0.99983	0.00088631
MUM1	0.17683	0.999995	2.17148e-06	0.75544	0.78745
MUS81	-0.09233	0.999995	2.17148e-06	0.74911	0.55977
MUTYH	-0.18322	0.999995	2.17148e-06	0.93571	0.83371
MVP	0.52469	0.929268	0.031859	0.31804	0.90616
MYBBP1A	-0.79163	0.748903	0.125574	0.21106	0.19944
NABP1	0.15677	0.999995	2.17148e-06	0.54406	0.79776
NABP2	0.77005	0.620885	0.206989	0.053788	0.93703
NAE1	-0.83366	0.860128	0.0654369	0.3581	0.23826
NBN	0.050393	0.999995	2.17148e-06	0.76728	0.62097
NCAPD2	-2.7016	0.167266	0.776592	0.90915	0.015206
NCAPD3	-1.7324	0.417046	0.379816	0.77854	0.081298
NCAPG	-2.1735	0.116413	0.933999	0.98159	0.0077194
NCAPG2	-1.839	0.06696	1.17418	0.99938	0.0029362
NCAPH	-2.1171	0.495417	0.305029	0.89679	0.10544
NCAPH2	-2.3521	0.044753	1.34918	0.99992	0.00036146
NDNL2	-2.0299	0.256234	0.591363	0.88645	0.034804
NEDD8	-2.2264	0.377741	0.422806	0.93066	0.069959
NEIL1	0.38178	0.928959	0.0320035	0.31694	0.85333
NEIL2	0.51866	0.817894	0.087303	0.18508	0.91951
NEIL3	-0.086171	0.999995	2.17148e-06	0.53667	0.86795
NEK1	0.45229	0.999995	2.17148e-06	0.81775	0.91575
NEK11	0.18224	0.999995	2.17148e-06	0.78436	0.93487
NEK6	0.26763	0.999995	2.17148e-06	0.62815	0.93397
NEK8	0.14136	0.999995	2.17148e-06	0.73051	0.90744
NEK9	0.42274	0.894279	0.048527	0.26196	0.74179
NELFB	-2.051	0.12015	0.920276	0.91953	0.0080957
NFATC2IP	-0.038062	0.999995	2.17148e-06	0.71446	0.7087
NFE2L2	-0.70365	0.704966	0.151832	0.95319	0.17417
NFRKB	-0.23457	0.806013	0.093658	0.46984	0.2181
NHEJ1	0.09226	0.999995	2.17148e-06	0.51705	0.66483
NHP2	-4.0199	0.124506	0.90481	0.99621	0.0098881
NIPBL	-0.93736	0.679253	0.167968	0.81177	0.16273
NLK	0.23173	0.999995	2.17148e-06	0.59358	0.97114
NONO	-1.3314	0.183244	0.73697	0.99512	0.018226
NOP10	-1.4243	0.491279	0.308672	0.94249	0.10402
NOTCH1	0.77035	0.817894	0.087303	0.18032	0.98298
NOTCH2	0.52672	0.709362	0.149132	0.087953	0.63735
NOTCH3	-0.091847	0.999995	2.17148e-06	0.12592	0.81436
NOTCH4	0.49423	0.897342	0.047042	0.27832	0.86539
NPM1	-5.1095	0.324401	0.488918	0.94633	0.054045
NSMCE1	-2.1802	0.157012	0.804067	0.9947	0.01377
NSMCE2	-0.39323	0.795506	0.0993565	0.58151	0.2144
NSMCE4A	-0.57794	0.681875	0.166295	0.54665	0.16628
NTHL1	0.46523	0.538973	0.268433	0.031704	0.99133
NUDT1	0.50385	0.817894	0.087303	0.19857	0.85974
NUDT16L1	0.15719	0.999995	2.17148e-06	0.45183	0.91208
OBFC1	-2.0955	0.073971	1.13094	0.81551	0.0035601
OGG1	0.85716	0.664028	0.177814	0.066048	0.83845
OPRM1	-0.27485	0.999995	2.17148e-06	0.84803	0.54757
OR10A7	0.43076	0.817894	0.087303	0.19365	0.83132
OR10AD1	-0.27425	0.999995	2.17148e-06	0.92368	0.53238
OR10G2	-0.071416	0.999995	2.17148e-06	0.88887	0.79677
OR10H3	0.44355	0.999995	2.17148e-06	0.42387	0.94392
OR10H5	0.52896	0.712302	0.147336	0.090657	0.96238
OR10Q1	0.23821	0.999995	2.17148e-06	0.70692	0.78368
OR10R2	0.42713	0.776612	0.109796	0.11538	0.96664
OR10S1	0.64186	0.20537	0.687463	0.0054912	0.9979
OR10T2	-0.17631	0.999995	2.17148e-06	0.94224	0.67424
OR10V1	0.070367	0.999995	2.17148e-06	0.38987	0.84835
OR10Z1	0.5652	0.583817	0.233723	0.04135	0.98405
OR11H1
OR11H6	0.36861	0.712302	0.147336	0.090617	0.71543
OR13A1	0.43071	0.817894	0.087303	0.16724	0.84674
OR13C2
OR13C4	0.45253	0.897342	0.047042	0.27871	0.97285
OR13J1	0.51089	0.709362	0.149132	0.077961	0.8886
OR1A2	-0.20573	0.999995	2.17148e-06	0.96216	0.81756
OR1D5	0.36023	0.890337	0.0504456	0.24611	0.75178
OR1E1	-0.26043	0.999995	2.17148e-06	0.71762	0.55509
OR1E2	0.20319	0.999995	2.17148e-06	0.54346	0.50643
OR1F1	0.86916	0.673492	0.171668	0.069553	0.97191
OR1I1	0.35315	0.999995	2.17148e-06	0.39088	0.73941
OR1L4	0.73552	0.414795	0.382166	0.020851	0.99231
OR1L6	0.23085	0.999995	2.17148e-06	0.5257	0.76592
OR1N1	0.47518	0.897342	0.047042	0.27684	0.79245
OR2B11	0.95079	0.600469	0.221509	0.049421	0.98062
OR2F2	-0.36773	0.999995	2.17148e-06	0.30902	0.74658
OR2L13	0.5595	0.856222	0.0674136	0.21245	0.77958
OR2L2	0.85422	0.60203	0.220382	0.050223	0.95596
OR2T10	0.65788	0.811504	0.0907093	0.14535	0.96479
OR2T29
OR2T35
OR2V2	0.65791	0.241255	0.617524	0.0069667	0.99833
OR4A47	-0.7602	0.319822	0.495092	0.98518	0.04954
OR4A5	-0.62698	0.999995	2.17148e-06	0.19679	0.31044
OR4B1	-0.27999	0.999995	2.17148e-06	0.82243	0.78973
OR4C11	0.58459	0.709362	0.149132	0.07911	0.94003
OR4C45
OR4C46	-0.11546	0.999995	2.17148e-06	0.93165	0.88202
OR4D1	0.19777	0.999995	2.17148e-06	0.86795	0.71251
OR4D5	0.62026	0.817894	0.087303	0.17181	0.9266
OR4D6	0.53269	0.817894	0.087303	0.18114	0.97664
OR4F15	0.44183	0.817894	0.087303	0.18514	0.9755
OR4F21
OR4F6	0.56645	0.620885	0.206989	0.052659	0.98415
OR4K1	-0.0069017	0.999995	2.17148e-06	0.58491	0.59148
OR4K14	0.435	0.817894	0.087303	0.19531	0.91059
OR4K17	0.50394	0.745649	0.127466	0.10521	0.81934
OR4L1	-0.22433	0.999995	2.17148e-06	0.79305	0.58316
OR4N5	0.089293	0.999995	2.17148e-06	0.84782	0.74711
OR4P4	0.50658	0.780897	0.107406	0.11702	0.97163
OR51B4	0.74694	0.477215	0.321286	0.02603	0.95959
OR51F1	0.19794	0.673492	0.171668	0.06987	0.80481
OR51G2	0.8427	0.343468	0.464114	0.013592	0.99637
OR51I1	0.27774	0.999995	2.17148e-06	0.43308	0.93044
OR51I2	0.37398	0.907049	0.0423693	0.2874	0.97534
OR51M1	0.10012	0.999995	2.17148e-06	0.75383	0.87267
OR52A5	0.28946	0.999995	2.17148e-06	0.5704	0.9531
OR52B2	0.72741	0.673492	0.171668	0.068662	0.9595
OR52B4	0.3513	0.894279	0.048527	0.26207	0.70796
OR52B6	-0.20601	0.999995	2.17148e-06	0.29741	0.70029
OR52H1	1.027	0.29784	0.526017	0.010512	0.99728
OR52I1	0.7269	0.892575	0.0493553	0.25229	0.57326
OR52K1	0.59628	0.999995	2.17148e-06	0.40312	0.97469
OR52L1	-0.055032	0.999995	2.17148e-06	0.68022	0.86463
OR52M1	0.071205	0.999995	2.17148e-06	0.60615	0.88163
OR52N5	0.40881	0.776612	0.109796	0.11545	0.97934
OR52R1	0.22242	0.999995	2.17148e-06	0.43762	0.92517
OR56A1	0.14441	0.87101	0.0599769	0.22264	0.87585
OR56A3	0.51381	0.892575	0.0493553	0.25711	0.73329
OR56B1	0.43239	0.811504	0.0907093	0.1398	0.8018
OR5A2	0.15741	0.999995	2.17148e-06	0.60387	0.66414
OR5AK2	0.026347	0.999995	2.17148e-06	0.64058	0.75207
OR5AN1	0.85415	0.709362	0.149132	0.087913	0.96372
OR5AP2	0.24259	0.999995	2.17148e-06	0.55169	0.94664
OR5AR1	0.48976	0.897342	0.047042	0.28003	0.76125
OR5B3	0.076708	0.999995	2.17148e-06	0.56973	0.6129
OR5F1	-0.15129	0.999995	2.17148e-06	0.5993	0.55894
OR5L1	0.49588	0.889932	0.0506432	0.2398	0.73343
OR5L2	0.33423	0.999995	2.17148e-06	0.4502	0.83176
OR5M10
OR5M9	0.53376	0.815104	0.088787	0.15246	0.95748
OR5R1	0.60171	0.912112	0.0399518	0.30165	0.85719
OR5T1	0.42184	0.999995	2.17148e-06	0.47445	0.77304
OR6B1	0.68155	0.771999	0.112383	0.1125	0.68711
OR6B2	0.20394	0.999995	2.17148e-06	0.54544	0.71826
OR6C4	0.24428	0.999995	2.17148e-06	0.72688	0.95813
OR6C6	0.068027	0.999995	2.17148e-06	0.676	0.90703
OR6C68	0.15264	0.999995	2.17148e-06	0.52584	0.75224
OR6C74	0.12558	0.999995	2.17148e-06	0.63904	0.74418
OR6K2	0.32264	0.999995	2.17148e-06	0.38893	0.95649
OR6K3	-0.1554	0.999995	2.17148e-06	0.6464	0.84391
OR6K6	0.39996	0.891557	0.0498509	0.24983	0.62752
OR6N2	0.4722	0.817894	0.087303	0.16788	0.97068
OR6V1	0.45223	0.897342	0.047042	0.27292	0.97789
OR6X1	0.5442	0.817894	0.087303	0.18753	0.6831
OR7A5	0.82114	0.186535	0.72924	0.0047881	0.99898
OR7D4	0.48716	0.889932	0.0506432	0.23396	0.91987
OR7G3	0.14371	0.999995	2.17148e-06	0.61776	0.7287
OR8B3
OR8B8	0.40847	0.896326	0.047534	0.26554	0.85523
OR8D2	0.82059	0.583817	0.233723	0.037507	0.77284
OR8G1
OR8G2
OR8G5	0.64708	0.811504	0.0907093	0.14785	0.59716
OR8J3	0.28224	0.974394	0.0112654	0.35056	0.84056
OR8K3	0.16113	0.999995	2.17148e-06	0.63558	0.86223
OR8U1	0.40703	0.999995	2.17148e-06	0.51059	0.95364
OR9G1	-0.1205	0.999995	2.17148e-06	0.4379	0.81498
OR9I1	0.62774	0.811504	0.0907093	0.14399	0.57729
ORC2	-1.2192	0.714096	0.146243	0.76899	0.18051
OTUB1	0.4339	0.999995	2.17148e-06	0.4697	0.9243
OTUB2	0.7941	0.709362	0.149132	0.088092	0.96288
OTUD7B	0.24199	0.999995	2.17148e-06	0.41167	0.8633
PAGR1	0.60283	0.809503	0.0917815	0.13506	0.91269
PAK1	0.77176	0.809503	0.0917815	0.12896	0.85921
PALB2	0.16752	0.999995	2.17148e-06	0.55749	0.67937
PAPD7	-0.83157	0.271332	0.566499	0.98943	0.037725
PARG
PARK2	0.42281	0.892575	0.0493553	0.25711	0.89269
PARK7	0.25258	0.911659	0.0401676	0.29154	0.58958
PARP1	0.54516	0.709362	0.149132	0.078248	0.96187
PARP14	0.11334	0.999995	2.17148e-06	0.76601	0.90178
PARP15	0.25648	0.999995	2.17148e-06	0.56351	0.90338
PARP2	-0.053444	0.999995	2.17148e-06	0.13671	0.78269
PARP3	0.26643	0.817894	0.087303	0.18764	0.53118
PARP4	0.7058	0.709362	0.149132	0.080496	0.85304
PARP9	0.79905	0.621782	0.206362	0.054531	0.97852
PARPBP	0.80807	0.600469	0.221509	0.04945	0.96963
PAXIP1	0.75756	0.580003	0.23657	0.035358	0.99011
PBRM1	0.062025	0.999995	2.17148e-06	0.42439	0.50959
PCID2	-2.3512	0.064931	1.18755	0.99944	0.0027778
PCNA	-4.216	0.010802	1.9665	1	3.466e-05
PDS5A	0.077205	0.999995	2.17148e-06	0.90411	0.67498
PDS5B	-0.024782	0.999995	2.17148e-06	0.79432	0.88372
PER1	0.78579	0.745649	0.127466	0.10239	0.86088
PER2	0.22585	0.889932	0.0506432	0.23565	0.66633
PER3	0.36956	0.903908	0.0438758	0.28519	0.96808
PGBD5	0.40863	0.897342	0.047042	0.2697	0.65459
PHF11	0.87093	0.087706	1.05697	0.0016488	0.99963
PHF3	0.61352	0.651989	0.18576	0.061364	0.97159
PHIP	-0.25557	0.999995	2.17148e-06	0.93245	0.55559
PIAS1	0.66857	0.583817	0.233723	0.040033	0.98629
PIAS2	0.18447	0.919398	0.0364964	0.31101	0.68973
PIAS3	-0.87731	0.480402	0.318395	0.86711	0.098965
PIAS4	0.028766	0.999995	2.17148e-06	0.62384	0.80691
PIF1	0.052219	0.999995	2.17148e-06	0.74146	0.54916
PIN1	0.19064	0.999995	2.17148e-06	0.4696	0.70037
PINK1	0.4227	0.998093	0.00082899	0.37575	0.93521
PINX1
PLK1	-2.8391	0.112021	0.950701	0.82841	0.0067092
PLRG1	-1.3639	0.441482	0.355087	0.84037	0.087824
PML	0.9342	0.664028	0.177814	0.065097	0.82041
PMP22	0.28839	0.999995	2.17148e-06	0.50903	0.75999
PMS1	-0.63798	0.999995	2.17148e-06	0.91613	0.34793
PMS2	0.31568	0.999995	2.17148e-06	0.5112	0.56142
PNKP	-1.5701	0.27596	0.559154	0.90338	0.039845
PNN	-1.5483	0.113503	0.944993	0.99827	0.0072836
POLA1	-1.5423	0.271332	0.566499	0.98956	0.03723
POLB	0.21621	0.999995	2.17148e-06	0.55323	0.83317
POLD1	-1.6911	0.064931	1.18755	0.99544	0.002352
POLD2	-1.7292	0.071444	1.14603	0.99932	0.0033621
POLD3	-2.0282	0.256234	0.591363	0.98677	0.034418
POLD4	0.24802	0.999995	2.17148e-06	0.44373	0.81685
POLE	-1.3373	0.411548	0.38558	0.96722	0.079229
POLE2	-3.0564	0.221126	0.65536	0.98525	0.026753
POLE3	0.35705	0.912112	0.0399518	0.30241	0.92876
POLE4	0.28525	0.999995	2.17148e-06	0.56061	0.89424
POLG	-0.040802	0.999995	2.17148e-06	0.15122	0.85512
POLG2	0.32873	0.999995	2.17148e-06	0.79828	0.91254
POLH	-0.30853	0.999995	2.17148e-06	0.91269	0.55728
POLI	0.34293	0.971009	0.0127767	0.34421	0.8486
POLK	0.24979	0.999995	2.17148e-06	0.46357	0.82258
POLL	-0.4009	0.999995	2.17148e-06	0.97521	0.81713
POLM	1.2875	0.541088	0.266732	0.032407	0.85785
POLN	0.23534	0.999995	2.17148e-06	0.71249	0.93809
POLQ	0.02103	0.999995	2.17148e-06	0.38892	0.50024
POLR2A	-2.2655	0.324401	0.488918	0.94971	0.052907
POLR2B	-2.6379	0.271332	0.566499	0.93557	0.037725
POLR2C	-3.0335	0.064931	1.18755	0.99962	0.0017182
POLR2D	-3.5231	0.041667	1.38021	0.9999	0.00022282
POLR2E	-4.4022	0.00463	2.33442	1	4.9515e-06
POLR2F	-3.3127	0.128367	0.891547	0.83725	0.010571
POLR2G	-3.0475	0.06239	1.20489	0.99972	0.0013121
POLR2H	-1.4615	0.610283	0.214469	0.81582	0.14229
POLR2I	-2.487	0.154721	0.810451	0.99485	0.013354
POLR2J	-2.2838	0.113503	0.944993	0.61563	0.007244
POLR2K
POLR2L	-3.7652	0.064931	1.18755	0.99959	0.0018766
POT1	-2.7196	0.064931	1.18755	0.9996	0.001837
PPM1D	0.70292	0.709362	0.149132	0.085844	0.90257
PPM1G	0.37855	0.999995	2.17148e-06	0.39497	0.86934
PPP4C	-3.3546	0.209319	0.679191	0.98851	0.024178
PPP4R1	0.1565	0.999995	2.17148e-06	0.58748	0.89815
PPP4R2	0.61726	0.745649	0.127466	0.10353	0.89821
PPP4R4	-0.26762	0.999995	2.17148e-06	0.61286	0.67189
PPP5C	0.41671	0.897342	0.047042	0.27619	0.82368
PPP6C	-1.629	0.122288	0.912616	0.99765	0.0091553
PPP6R1	0.34536	0.815517	0.088567	0.15525	0.60978
PPP6R2	-1.0286	0.965965	0.0150386	0.82316	0.28204
PPP6R3	0.35656	0.890337	0.0504456	0.24659	0.78581
PRDM10	-0.091325	0.999995	2.17148e-06	0.87459	0.56721
PRDM9	0.93405	0.500437	0.300651	0.028367	0.98917
PRIMPOL	0.70851	0.446856	0.349832	0.02294	0.9915
PRKCG	0.4976	0.889932	0.0506432	0.24015	0.89674
PRKDC
PRMT1	-1.8476	0.189091	0.723329	0.79732	0.019415
PRMT6	0.82336	0.600469	0.221509	0.048876	0.97245
PRMT8	0.61562	0.809503	0.0917815	0.12976	0.80095
PRPF19	-1.8677	0.720069	0.142626	0.087092	0.18714
PSIP1	-0.46564	0.999995	2.17148e-06	0.96	0.54246
PSMD14	-3.8345	0.114375	0.941669	0.99824	0.0074619
PSME3	-0.66928	0.926558	0.0331274	0.95535	0.26855
PTEN	1.8678	0.086516	1.0629	0.00089622	0.99892
PTPN2	0.34898	0.946351	0.0239478	0.32692	0.87058
PXMP2	0.65806	0.391645	0.407107	0.017593	0.99523
RAD1	-1.2593	0.29422	0.531328	0.98765	0.042796
RAD17	-1.4444	0.507512	0.294554	0.89477	0.11021
RAD18	-0.14959	0.999995	2.17148e-06	0.40745	0.82291
RAD21	-2.258	0.183223	0.73702	0.99311	0.018028
RAD23A	-0.29506	0.999995	2.17148e-06	0.54952	0.71436
RAD23B	-0.065082	0.999995	2.17148e-06	0.90362	0.7631
RAD50	-1.2961	0.890059	0.0505812	0.91314	0.25226
RAD51	-2.142	0.225455	0.64694	0.63073	0.027971
RAD51AP1	0.5417	0.817894	0.087303	0.19568	0.97235
RAD51B	-0.084199	0.999995	2.17148e-06	0.53357	0.75533
RAD51C	-2.5242	0.195536	0.708773	0.99168	0.022168
RAD51D	-1.4788	0.333304	0.477159	0.64382	0.057036
RAD52	0.43278	0.897342	0.047042	0.27919	0.76732
RAD54B	0.11379	0.999995	2.17148e-06	0.55699	0.89391
RAD54L	-0.34556	0.999995	2.17148e-06	0.53123	0.37147
RAD54L2	0.18121	0.999995	2.17148e-06	0.72107	0.71363
RAD9A	-2.2934	0.34682	0.459896	0.62722	0.05972
RAD9B	0.77477	0.359568	0.444219	0.014998	0.99601
RAG1	0.39704	0.903908	0.0438758	0.28484	0.90326
RAG2	-0.02544	0.999995	2.17148e-06	0.81029	0.55426
RAP1A	-0.0064473	0.999995	2.17148e-06	0.68553	0.85234
RASSF7	-0.42568	0.999995	2.17148e-06	0.90095	0.56285
RBBP7	-0.98185	0.500856	0.300287	0.94817	0.10714
RBBP8	-1.2752	0.580079	0.236513	0.46548	0.13153
RBM7	0.056605	0.999995	2.17148e-06	0.76166	0.67572
RBX1	-1.0718	0.221126	0.65536	0.99274	0.026545
RECQL	0.45707	0.817894	0.087303	0.17865	0.77391
RECQL4
RECQL5	0.18685	0.999995	2.17148e-06	0.546	0.86896
REV1	0.073168	0.999995	2.17148e-06	0.70411	0.64151
REV3L	-0.19384	0.859148	0.065932	0.95684	0.2356
RFC1	-0.41345	0.999995	2.17148e-06	0.91059	0.54082
RFC2	-4.026	0.06239	1.20489	0.99974	0.0012428
RFC3	-2.8198	0.333304	0.477159	0.97755	0.056541
RFC4	-1.714	0.360354	0.443271	0.97438	0.063592
RFC5	-2.4603	0.122913	0.910402	0.98705	0.0093335
RFWD3	-0.5178	0.88319	0.0539459	0.95279	0.24937
RHNO1	0.80396	0.811504	0.0907093	0.14386	0.85586
RHO	0.51001	0.817894	0.087303	0.19249	0.97751
RIF1	-0.55749	0.860128	0.0654369	0.85183	0.23738
RING1	0.86279	0.259755	0.585436	0.0077788	0.98859
RINN1
RMI1	-0.095914	0.999995	2.17148e-06	0.2264	0.40401
RMI2	0.04203	0.999995	2.17148e-06	0.78282	0.78403
RNASEH2A	-0.28291	0.999995	2.17148e-06	0.6792	0.81019
RNF10	0.043196	0.999995	2.17148e-06	0.40364	0.75298
RNF111	0.14992	0.999995	2.17148e-06	0.52058	0.69957
RNF113A	-1.005	0.167266	0.776592	0.99429	0.014869
RNF113B	0.33844	0.999995	2.17148e-06	0.43506	0.84755
RNF126	0.74898	0.811504	0.0907093	0.13845	0.76364
RNF138	0.18208	0.811504	0.0907093	0.14928	0.91427
RNF146	1.5615	0.086516	1.0629	0.00072787	0.92484
RNF165	0.78721	0.583817	0.233723	0.039211	0.98898
RNF168	0.092314	0.999995	2.17148e-06	0.54784	0.83846
RNF169	-0.22977	0.999995	2.17148e-06	0.60654	0.51815
RNF17	0.594	0.809503	0.0917815	0.13483	0.98153
RNF2	-0.1775	0.999995	2.17148e-06	0.52396	0.71397
RNF20	-2.641	0.064931	1.18755	0.99946	0.0027283
RNF4	-1.201	0.447261	0.349439	0.91856	0.090409
RNF40	-1.1443	0.324401	0.488918	0.98375	0.053768
RNF7	0.3638	0.890337	0.0504456	0.24663	0.90009
RNF8	-0.45223	0.999995	2.17148e-06	0.68259	0.3661
RPA1	-1.7057	0.309988	0.508655	0.29455	0.046747
RPA2	-1.9354	0.113503	0.944993	0.99827	0.0072539
RPA3	-3.7068	0.046717	1.33053	0.99988	0.00053971
RPA4	0.20672	0.999995	2.17148e-06	0.50059	0.8763
RPAIN	-0.33596	0.999995	2.17148e-06	0.91575	0.42883
RPS27L	0.83003	0.809503	0.0917815	0.13485	0.94836
RRM1	-3.6352	0.044753	1.34918	0.99992	0.00039117
RRM2	-1.4137	0.167266	0.776592	0.90605	0.015038
RRM2B	0.7851	0.732863	0.134977	0.095143	0.71947
RTEL1	-0.42618	0.90451	0.0435866	0.81423	0.25891
RTF1	-2.5933	0.196132	0.707452	0.97805	0.022445
RTFDC1	-1.7799	0.449732	0.347046	0.74694	0.091389
RUVBL1	-4.1696	0.064931	1.18755	0.99958	0.0019459
RUVBL2	-3.9365	0.064931	1.18755	0.99951	0.002342
SAE1	-1.4461	0.1468	0.833274	0.9967	0.012403
SALL4	0.20681	0.999995	2.17148e-06	0.39899	0.85652
SAMHD1	0.071455	0.999995	2.17148e-06	0.59948	0.86136
SCAF11	-1.2703	0.596086	0.224691	0.83229	0.13771
SCAF4	0.5971	0.817894	0.087303	0.19513	0.97565
SCAF8	0.17401	0.960385	0.0175546	0.33382	0.88382
SCAI	0.3223	0.84888	0.0711537	0.20791	0.89096
SENP2	-0.37581	0.999995	2.17148e-06	0.36059	0.39364
SENP6	-0.75875	0.445011	0.351629	0.96292	0.089478
SENP7	-0.22555	0.999995	2.17148e-06	0.88979	0.53875
SENP8	1.411	0.086516	1.0629	0.0012527	0.97178
SERBP1	0.16425	0.892575	0.0493553	0.2562	0.69909
SET	0.077405	0.999995	2.17148e-06	0.79855	0.79132
SETD2	-0.15581	0.999995	2.17148e-06	0.65398	0.46237
SETD8	-1.0795	0.724358	0.140047	0.92249	0.1898
SETDB1	-0.83964	0.27596	0.559154	0.98881	0.039567
SETMAR	0.55414	0.889932	0.0506432	0.24081	0.98113
SETX	0.17112	0.999995	2.17148e-06	0.71597	0.95108
SF3B1	-2.0512	0.389177	0.409853	0.97889	0.073673
SFPQ	-0.96612	0.714096	0.146243	0.81837	0.17959
SFR1	-0.73817	0.999995	2.17148e-06	0.832	0.39401
SHFM1	-0.82825	0.699134	0.15544	0.89871	0.17198
SHPRH	0.10377	0.999995	2.17148e-06	0.8853	0.62262
SIN3A	-1.0596	0.195536	0.708773	0.69291	0.022158
SIRT1	0.46398	0.999995	2.17148e-06	0.40354	0.6695
SIRT2	1.0164	0.400779	0.397095	0.01886	0.85709
SIRT3	-0.24918	0.999995	2.17148e-06	0.080437	0.82323
SIRT4	0.13951	0.999995	2.17148e-06	0.73209	0.70864
SIRT5	0.6016	0.817894	0.087303	0.17644	0.95436
SIRT6	-0.15357	0.999995	2.17148e-06	0.85319	0.73372
SIRT7	0.20962	0.998093	0.00082899	0.3742	0.84636
SKIV2L2	-1.8168	0.507512	0.294554	0.95443	0.1098
SKP1	-1.6282	0.718989	0.143278	0.90839	0.18609
SLBP	0.080952	0.815104	0.088787	0.15343	0.86489
SLFN11	-0.025367	0.999995	2.17148e-06	0.7471	0.73878
SLX1A
SLX4	-0.50385	0.999995	2.17148e-06	0.92225	0.46584
SLX4IP	-0.11526	0.999995	2.17148e-06	0.77388	0.61855
SMARCA2	0.39655	0.989874	0.00442008	0.36736	0.97992
SMARCA4	0.43208	0.799178	0.0973565	0.12223	0.96274
SMARCA5	-1.0741	0.480402	0.318395	0.93928	0.099163
SMARCAD1	0.8952	0.588776	0.23005	0.045974	0.97794
SMARCAL1	0.61689	0.709362	0.149132	0.080447	0.84694
SMARCB1	-0.62841	0.852705	0.0692012	0.86735	0.23256
SMARCC2	0.44245	0.817894	0.087303	0.19158	0.86061
SMARCD1	2.0474	0.086516	1.0629	0.0013319	0.99957
SMARCE1	0.54258	0.809503	0.0917815	0.13506	0.90115
SMC1A	-3.5273	0.058951	1.22951	0.9998	0.00094573
SMC1B	0.33832	0.892575	0.0493553	0.2518	0.92832
SMC2	-4.5318	0.044753	1.34918	0.99991	0.00043078
SMC3	-2.4457	0.124506	0.90481	0.99617	0.0099871
SMC4	-2.9916	0.095463	1.02016	0.99819	0.005105
SMC5	-1.2547	0.440142	0.356407	0.72387	0.086616
SMC6	-2.363	0.120572	0.918754	0.99785	0.0087096
SMEK2	0.328	0.970147	0.0131625	0.34033	0.93117
SMG1	-1.302	0.244877	0.611052	0.99127	0.031952
SMG6	-0.51198	0.844798	0.0732471	0.71309	0.2295
SMUG1	0.73999	0.588097	0.230551	0.0434	0.98312
SOD1	-5.4368	0.044753	1.34918	0.99992	0.00038126
SP100	0.60527	0.817894	0.087303	0.18782	0.96349
SP140	0.82476	0.817894	0.087303	0.18484	0.89009
SPIDR	0.8382	0.811504	0.0907093	0.14434	0.80215
SPO11	-0.06666	0.999995	2.17148e-06	0.26174	0.65697
SPRTN	-2.2151	0.374483	0.426568	0.97261	0.068088
SPTBN1	0.90375	0.391645	0.407107	0.017097	0.9954
SSBP1	0.57858	0.920874	0.0357998	0.3132	0.86515
SSBP2	0.96836	0.588776	0.23005	0.044974	0.98683
SSBP3	0.77673	0.732863	0.134977	0.096638	0.86162
SSRP1	-4.3993	0.010802	1.9665	1	2.4757e-05
STAG1	1.0796	0.047222	1.32586	0.00025253	0.99994
STAG2	0.39677	0.817894	0.087303	0.18587	0.93277
STRA13	0.18434	0.896326	0.047534	0.26539	0.6256
SUMO1	-0.11176	0.999995	2.17148e-06	0.67875	0.63218
SUMO2	-0.30346	0.999995	2.17148e-06	0.78193	0.39717
SUMO3	0.83987	0.500437	0.300651	0.028367	0.87872
SUMO4	0.47116	0.919398	0.0364964	0.3072	0.902
SUPT16H	-2.6152	0.06239	1.20489	0.99971	0.0013815
SUPT4H1	-1.0415	0.254479	0.594348	0.99078	0.033477
SUPT5H	-1.7193	0.353252	0.451915	0.98298	0.061205
SUPT6H	-1.5547	0.397708	0.400436	0.96865	0.076139
SUV39H1	-0.18956	0.999995	2.17148e-06	0.81166	0.61396
SUV39H2	0.23494	0.999995	2.17148e-06	0.73766	0.88956
SUV420H1	-0.0018661	0.999995	2.17148e-06	0.54078	0.57396
SUV420H2	-0.45921	0.999995	2.17148e-06	0.74809	0.38646
SWI5
Scrambled
TADA2B	-0.32431	0.999995	2.17148e-06	0.87778	0.7273
TADA3	-0.023404	0.999995	2.17148e-06	0.59061	0.51158
TAF1	-0.82721	0.305321	0.515243	0.84511	0.045063
TAF1L	0.3176	0.809503	0.0917815	0.13072	0.94447
TAF6L	-0.54911	0.999995	2.17148e-06	0.72053	0.31425
TAF9	-2.2803	0.239172	0.62129	0.98271	0.030952
TAOK2	1.4121	0.086516	1.0629	0.0013617	0.99972
TAOK3	0.56261	0.815104	0.088787	0.15287	0.94178
TCEA1	0.15454	0.999995	2.17148e-06	0.71136	0.74198
TCEB1
TCEB2	-2.0283	0.23615	0.626812	0.73235	0.029803
TCEB3	0.61726	0.583817	0.233723	0.039646	0.98876
TCOF1	-0.44067	0.999995	2.17148e-06	0.9741	0.39947
TDG	-0.91098	0.860167	0.0654172	0.9595	0.23919
TDP1	-0.53089	0.999995	2.17148e-06	0.23556	0.38054
TDP2	-0.091459	0.999995	2.17148e-06	0.66759	0.71923
TELO2	-2.6702	0.064931	1.18755	0.99944	0.0017182
TEN1	-2.5564	0.064931	1.18755	0.99958	0.001936
TEP1	0.46272	0.999995	2.17148e-06	0.45075	0.95582
TERF1	0.2879	0.972402	0.0121542	0.34736	0.87675
TERF2
TERF2IP	0.19108	0.999995	2.17148e-06	0.74353	0.81982
TERT	-0.41596	0.999995	2.17148e-06	0.66919	0.3577
TET2	0.54903	0.897342	0.047042	0.26977	0.85214
TFPT	0.16522	0.999995	2.17148e-06	0.58115	0.66821
THOC1	-1.6077	0.154721	0.810451	0.99587	0.013404
THOC2	-2.46	0.048789	1.31168	0.99986	0.00067835
THRAP3	0.57126	0.301334	0.520952	0.010958	0.99715
TICRR	-1.502	0.064931	1.18755	0.99653	0.0027382
TIMELESS	-4.3128	0.06239	1.20489	0.99972	0.0012923
TINF2	-2.6395	0.103824	0.983702	0.99861	0.0059962
TIPIN	-0.093552	0.360354	0.443271	0.85849	0.063087
TNKS	0.54994	0.889932	0.0506432	0.23743	0.97347
TNP1	0.68774	0.583817	0.233723	0.037597	0.98947
TONSL	-1.4252	0.444519	0.35211	0.96274	0.088904
TOP1	-1.209	0.543056	0.265155	0.98147	0.12151
TOP2A	-2.1246	0.373302	0.42794	0.75027	0.067474
TOP2B	-0.041999	0.999995	2.17148e-06	0.85055	0.82037
TOP3A	-2.8978	0.189186	0.723111	0.84116	0.020663
TOP3B	0.050907	0.999995	2.17148e-06	0.54345	0.69819
TOPBP1	-0.7668	0.324401	0.488918	0.98411	0.052837
TOPORS	0.38617	0.817894	0.087303	0.18299	0.70897
TP53	0.88168	0.320345	0.494382	0.012334	0.83258
TP53BP1	0.24257	0.999995	2.17148e-06	0.49231	0.94546
TP63	0.27813	0.974394	0.0112654	0.35136	0.89507
TP73	-0.21332	0.999995	2.17148e-06	0.66429	0.76251
TPP1	0.00083618	0.988239	0.00513801	0.3657	0.73449
TRAIP	-1.815	0.064931	1.18755	0.99948	0.0025104
TRAPPC13	-0.86136	0.651144	0.186323	0.94392	0.15332
TREX1	0.3015	0.999995	2.17148e-06	0.44978	0.88053
TREX2	0.61494	0.811504	0.0907093	0.14665	0.98306
TRIM28	-0.12375	0.999995	2.17148e-06	0.056472	0.55302
TRIM29	0.19642	0.999995	2.17148e-06	0.7389	0.85016
TRIM34
TRIM65	0.065957	0.999995	2.17148e-06	0.71419	0.82721
TRIP12	0.44079	0.780897	0.107406	0.11776	0.94375
TRIP13	0.76217	0.659644	0.18069	0.06279	0.95319
TRRAP	-1.7889	0.308234	0.511119	0.91932	0.046153
TTI1	-1.7656	0.994238	0.00250964	0.82129	0.29136
TTI2	-0.92405	0.313746	0.503422	0.98578	0.047846
TYMS	0.75081	0.698554	0.1558	0.073217	0.94038
UBA1	-2.3497	0.171195	0.766509	0.99373	0.016365
UBA2	-2.6991	0.063763	1.19543	0.99965	0.0015003
UBA3	-0.22155	0.999995	2.17148e-06	0.24792	0.34035
UBB
UBC	-0.90666	0.491279	0.308672	0.94041	0.10404
UBE2A	-0.038267	0.999995	2.17148e-06	0.85259	0.83571
UBE2B	1.0865	0.588776	0.23005	0.046598	0.98518
UBE2C	0.12444	0.999995	2.17148e-06	0.39142	0.70417
UBE2D1	0.24139	0.953432	0.0207103	0.33039	0.94971
UBE2D2	0.0029894	0.999995	2.17148e-06	0.6549	0.74631
UBE2D3	0.13176	0.970147	0.0131625	0.33977	0.8477
UBE2D4	0.79892	0.641419	0.192858	0.058769	0.96709
UBE2F	1.1851	0.29784	0.526017	0.010284	0.98172
UBE2I	-2.6581	0.120572	0.918754	0.68437	0.0088285
UBE2K	0.88922	0.317063	0.498854	0.011869	0.99688
UBE2M	0.82337	0.086516	1.0629	0.0014013	0.78836
UBE2N	-2.7118	0.189186	0.723111	0.87552	0.020811
UBE2NL	0.61471	0.817894	0.087303	0.19325	0.80828
UBE2R2	0.30643	0.971009	0.0127767	0.34204	0.80993
UBE2S	-0.22156	0.999995	2.17148e-06	0.43602	0.6331
UBE2T	-0.24152	0.999995	2.17148e-06	0.88672	0.76873
UBE2U	0.44585	0.897342	0.047042	0.26855	0.94777
UBE2V1
UBE2V2	0.22684	0.999995	2.17148e-06	0.65227	0.70296
UBE2W	0.085855	0.999995	2.17148e-06	0.57734	0.79885
UBR5	-0.34519	0.999995	2.17148e-06	0.96825	0.56227
UCHL3	0.56002	0.817894	0.087303	0.18991	0.93322
UCHL5	-0.81625	0.734338	0.134104	0.97674	0.19478
UHRF1
UHRF2	0.14896	0.999995	2.17148e-06	0.57828	0.75085
UIMC1	0.52972	0.817894	0.087303	0.19588	0.88265
UNG	0.089711	0.971009	0.0127767	0.3429	0.82834
UPF1	-2.4884	0.06735	1.17166	0.99937	0.0030254
USP1	-0.70482	0.483594	0.315519	0.95848	0.10053
USP10	-0.64577	0.300453	0.522223	0.98715	0.044024
USP11	0.3339	0.999995	2.17148e-06	0.5074	0.97656
USP13	0.25418	0.999995	2.17148e-06	0.53388	0.73365
USP14	0.89658	0.709362	0.149132	0.085626	0.86762
USP15	1.1581	0.709362	0.149132	0.08316	0.48532
USP20	0.54241	0.817894	0.087303	0.19323	0.84803
USP22	0.094656	0.999995	2.17148e-06	0.8298	0.50464
USP26	0.17172	0.999995	2.17148e-06	0.60907	0.77368
USP28	-0.0079526	0.999995	2.17148e-06	0.8886	0.73842
USP3	0.98983	0.270913	0.56717	0.0084027	0.99789
USP34	0.29113	0.73044	0.136415	0.093746	0.65914
USP37	-1.2125	0.271359	0.566456	0.9893	0.03831
USP4	0.063489	0.999995	2.17148e-06	0.56844	0.83403
USP44	0.76426	0.879001	0.0560106	0.22845	0.82544
USP45	0.40898	0.87101	0.0599769	0.2199	0.81591
USP47	0.11184	0.999995	2.17148e-06	0.68957	0.83511
USP48	0.079588	0.999995	2.17148e-06	0.75797	0.78155
USP5	-3.8488	0.189186	0.723111	0.96978	0.020821
USP51	0.34822	0.980095	0.00873183	0.35983	0.85038
USP7	1.5852	0.02662	1.57479	9.4078e-05	0.97374
UVRAG	-1.1215	0.313746	0.503422	0.94321	0.047985
UVSSA	0.53279	0.86133	0.0648304	0.21464	0.65586
VCP	-2.9602	0.210227	0.677312	0.99323	0.024643
WAPAL	-1.2966	0.329883	0.48164	0.87585	0.055392
WDR48	0.047672	0.999995	2.17148e-06	0.67844	0.54027
WDR70	-1.4885	0.064931	1.18755	0.99947	0.0026292
WDR76	0.24917	0.890337	0.0504456	0.24383	0.77913
WEE1	-1.5219	0.113503	0.944993	0.99828	0.0072143
WHSC1	0.20496	0.999995	2.17148e-06	0.54997	0.73699
WRAP53	-1.2641	0.543056	0.265155	0.2926	0.12082
WRN	-0.062215	0.999995	2.17148e-06	0.60882	0.85183
WRNIP1	0.062283	0.937796	0.0278916	0.32196	0.93869
XAB2	-0.57445	0.881267	0.0548925	0.8244	0.24789
XPA	0.569	0.626227	0.203268	0.05559	0.91734
XPC	0.50049	0.999995	2.17148e-06	0.41248	0.96594
XRCC1	-0.16915	0.999995	2.17148e-06	0.86376	0.73791
XRCC2	-0.22001	0.999995	2.17148e-06	0.58294	0.43919
XRCC3	-1.681	0.064931	1.18755	0.99571	0.002342
XRCC4	0.050394	0.999995	2.17148e-06	0.69205	0.8024
XRCC5	-2.7503	0.417046	0.379816	0.97374	0.081625
XRCC6	-2.0848	0.120572	0.918754	0.99723	0.0085809
XRCC6BP1	-0.19818	0.999995	2.17148e-06	0.55484	0.58797
YBX1	-1.3583	0.513732	0.289263	0.84592	0.11319
YTHDF2	-0.55188	0.714096	0.146243	0.90866	0.18323
ZBTB2	0.16458	0.999995	2.17148e-06	0.45125	0.69655
ZBTB32	0.73249	0.817894	0.087303	0.17067	0.61112
ZDHHC16	0.079141	0.999995	2.17148e-06	0.81442	0.68998
ZMPSTE24	0.14447	0.999995	2.17148e-06	0.42932	0.68859
ZMYM3	0.9144	0.811504	0.0907093	0.14603	0.92897
ZMYND8	-0.16652	0.999995	2.17148e-06	0.67355	0.65185
ZNF451	0.33473	0.817894	0.087303	0.18644	0.90901
ZNF827	0.1979	0.999995	2.17148e-06	0.52234	0.62079
ZRANB3	0.41296	0.999995	2.17148e-06	0.52315	0.89603
ZSWIM7	-0.05719	0.999995	2.17148e-06	0.62872	0.84088

## Sheet: Haapaniemi (2018), WT
Gene	lfc	fdr	fdr_log10	pos_p	neg_p
ABL1	0.43845	0.996442	0.00154798	0.1719	0.9278
ACD	0.70478	0.860809	0.0650932	0.051312	0.29773
ACTL6A	0.46575	0.996442	0.00154798	0.16026	0.95
ACTR5	-0.052606	0.983879	0.00705831	0.38298	0.37071
ACTR8	-0.42118	0.983879	0.00705831	0.97401	0.35056
ADH5	0.40935	0.996442	0.00154798	0.44678	0.76311
AICDA	-0.092082	0.995664	0.0018872	0.91971	0.57946
AKAP8	0.30928	0.996442	0.00154798	0.26846	0.39328
ALDH2	0.29145	0.996442	0.00154798	0.12926	0.79886
ALKBH1	-0.063159	0.995664	0.0018872	0.22523	0.56364
ALKBH2	0.078863	0.997587	0.00104922	0.80127	0.81879
ALKBH3	-0.15708	0.995664	0.0018872	0.88182	0.49002
AMN1	0.12063	0.996442	0.00154798	0.50215	0.41274
ANKRD28	-0.14345	0.995664	0.0018872	0.74034	0.48281
ANKRD32	0.31831	0.996442	0.00154798	0.57215	0.92832
ANKRD44	0.15976	0.996442	0.00154798	0.69566	0.57415
ANKRD52	0.95029	0.996442	0.00154798	0.16915	0.84346
ANP32E	-0.056452	0.999995	2.17148e-06	0.59733	0.80691
APAF1	0.038631	0.996442	0.00154798	0.64376	0.85539
APBB1	0.044372	0.997587	0.00104922	0.74176	0.71851
APC	0.53842	0.816731	0.087921	0.028926	0.73542
APEX1	0.96754	0.949623	0.0224488	0.074189	0.97558
APEX2	-0.33519	0.869909	0.0605262	0.75786	0.10984
APITD1	0.62577	0.769373	0.113863	0.015699	0.99508
APLF	-0.45082	0.983879	0.00705831	0.96041	0.27518
APOBEC1	0.15432	0.996442	0.00154798	0.50668	0.70833
APOBEC2	0.35273	0.996442	0.00154798	0.23447	0.57979
APOBEC3A	0.30188	0.996442	0.00154798	0.47734	0.73258
APOBEC3B	0.18932	0.996442	0.00154798	0.45108	0.8539
APOBEC3C	0.39216	0.996442	0.00154798	0.30814	0.60166
APOBEC3D	-0.50317	0.983879	0.00705831	0.98328	0.23696
APOBEC3F	0.65899	0.996442	0.00154798	0.11285	0.7751
APOBEC3G	-0.071644	0.983879	0.00705831	0.06049	0.29678
APOBEC3H	0.056601	0.997587	0.00104922	0.8827	0.42813
APTX	-0.54246	0.883263	0.05391	0.63973	0.12732
ARID1A	0.1492	0.996442	0.00154798	0.27095	0.37366
ARID1B	-0.35141	0.983879	0.00705831	0.69981	0.3256
ARID2	-0.069096	0.983879	0.00705831	0.64744	0.28503
ASCC1	0.18909	0.996442	0.00154798	0.089559	0.9361
ASF1A	0.042791	0.997587	0.00104922	0.75576	0.73011
ASF1B	0.70556	0.996442	0.00154798	0.19871	0.71817
ASH1L	-0.64724	0.860932	0.0650311	0.68374	0.10205
ASH2L	0.90481	0.826242	0.0828927	0.036208	0.9403
ATAD5	0.42295	0.996442	0.00154798	0.26061	0.84925
ATF2	0.24179	0.996442	0.00154798	0.13382	0.26993
ATM	0.38375	0.996442	0.00154798	0.33514	0.76121
ATMIN	-0.46442	0.983879	0.00705831	0.48846	0.23536
ATR	-0.41151	0.914069	0.039021	0.5015	0.1432
ATRIP	0.0090536	0.996442	0.00154798	0.68067	0.32182
ATRX	-0.33417	0.983879	0.00705831	0.9523	0.23491
ATXN3	0.51777	0.996442	0.00154798	0.41816	0.81349
ATXN7	1.3891	0.644163	0.191004	0.010736	0.99559
AUNIP	-0.3718	0.983879	0.00705831	0.29975	0.23973
BABAM1	0.52191	0.996442	0.00154798	0.31225	0.87337
BAP1	-0.20212	0.995664	0.0018872	0.83854	0.65583
BARD1	-0.35538	0.983879	0.00705831	0.68493	0.23146
BAZ1A	0.20802	0.996442	0.00154798	0.49314	0.50207
BAZ1B	0.36079	0.996442	0.00154798	0.35461	0.58729
BCAS2	-0.65122	0.825472	0.0832977	0.96902	0.036277
BCCIP	-0.12518	0.983879	0.00705831	0.63258	0.36961
BCLAF1	2.1211	0.599686	0.222076	0.0093701	0.49514
BEND3	0.2412	0.996442	0.00154798	0.65629	0.94945
BLM	-0.17496	0.995664	0.0018872	0.93553	0.5487
BMI1	0.32753	0.996442	0.00154798	0.35463	0.089677
BOD1L1	-0.14919	0.995664	0.0018872	0.5709	0.51173
BPTF	0.2932	0.996442	0.00154798	0.48543	0.65038
BRAP	-0.18141	0.995664	0.0018872	0.72242	0.66996
BRAT1	-0.58856	0.940137	0.0268089	0.91068	0.16479
BRCA1	0.41218	0.996442	0.00154798	0.34853	0.6678
BRCA2	-0.15525	0.995664	0.0018872	0.88409	0.4327
BRCC3	0.56381	0.996442	0.00154798	0.26684	0.89137
BRD1	-0.24392	0.995664	0.0018872	0.57465	0.51778
BRD2	0.021743	0.996442	0.00154798	0.33815	0.81677
BRD4	0.13008	0.996442	0.00154798	0.42154	0.73218
BRD7	-0.2815	0.842407	0.074478	0.83202	0.048963
BRD8	0.33213	0.996442	0.00154798	0.34211	0.18564
BRDT	-0.10891	0.995664	0.0018872	0.75188	0.5338
BRE	0.38593	0.996442	0.00154798	0.19681	0.28578
BRIP1	-0.14648	0.995664	0.0018872	0.40525	0.4116
BTG2	0.65175	0.826242	0.0828927	0.030921	0.99032
BUB1B	-0.37078	0.869909	0.0605262	0.55411	0.11048
C10orf12	-0.34406	0.983879	0.00705831	0.93329	0.38288
C11orf30	0.66299	0.996442	0.00154798	0.29301	0.25431
C15orf41	0.28041	0.996442	0.00154798	0.32265	0.27313
C17orf70	-0.38274	0.983879	0.00705831	0.02584	0.20291
C19orf40	-0.17766	0.983879	0.00705831	0.71338	0.35708
C1orf115	-0.67313	0.983879	0.00705831	0.88652	0.21457
C1orf86	0.064627	0.996442	0.00154798	0.50682	0.37809
C20orf196	0.04109	0.996442	0.00154798	0.53623	0.51253
C4orf27	-0.15573	0.995664	0.0018872	0.81692	0.58474
C7orf49	0.28018	0.996442	0.00154798	0.53888	0.60644
C9orf142	-0.80926	0.825472	0.0832977	0.95113	0.038173
CAND1	2.3116	0.001179	2.92849	4.9135e-06	0.99999
CASP3	-0.29828	0.878266	0.0563739	0.44045	0.11809
CBX1	0.1843	0.996442	0.00154798	0.52909	0.7563
CBX3	-0.11195	0.940137	0.0268089	0.40682	0.16608
CBX4	-0.18965	0.995664	0.0018872	0.95758	0.74119
CBX5	-0.2397	0.825472	0.0832977	0.34893	0.0041716
CCDC101	0.035712	0.997587	0.00104922	0.76608	0.5996
CCNA1	0.16823	0.996442	0.00154798	0.27407	0.72479
CCNA2	-0.94136	0.825472	0.0832977	0.99716	0.0095568
CCNB1	0.90098	0.938233	0.0276893	0.071585	0.70053
CCNB2	0.096946	0.996442	0.00154798	0.59896	0.65062
CCNB3	0.48448	0.826242	0.0828927	0.039028	0.98767
CCNC	-0.62179	0.881931	0.0545654	0.36393	0.12035
CCND1	0.43192	0.996442	0.00154798	0.33561	0.59085
CCND2	0.4309	0.860809	0.0650932	0.052747	0.98312
CCND3	0.10333	0.996442	0.00154798	0.49476	0.72349
CCNE1	0.38894	0.996442	0.00154798	0.23394	0.8727
CCNH	0.27545	0.996442	0.00154798	0.41555	0.39518
CCNO	0.0043475	0.997587	0.00104922	0.8127	0.87098
CDC25A	0.52812	0.938233	0.0276893	0.072322	0.11418
CDC25B	-0.4518	0.995664	0.0018872	0.89008	0.46381
CDC34	0.34743	0.996442	0.00154798	0.37143	0.90303
CDC5L	-0.13267	0.983879	0.00705831	0.25017	0.32033
CDC7	-0.18289	0.983879	0.00705831	0.74276	0.33274
CDCA5	-0.077196	0.995664	0.0018872	0.70556	0.56338
CDK1	0.17119	0.996442	0.00154798	0.12554	0.32874
CDK12	-0.28778	0.995664	0.0018872	0.9775	0.48898
CDK2	-0.045227	0.995664	0.0018872	0.67202	0.4279
CDK4	-0.53443	0.842407	0.074478	0.71756	0.067261
CDK7	-0.2409	0.983879	0.00705831	0.92981	0.38156
CDK8
CDK9	-1.6196	0.825472	0.0832977	0.58537	0.018303
CDKL5	0.88075	0.826242	0.0828927	0.039814	0.67976
CDKN1A	1.4266	0.569039	0.244858	0.0065202	0.99822
CDKN1B	0.49201	0.996442	0.00154798	0.36767	0.20925
CDKN2A	-0.13935	0.883263	0.05391	0.55081	0.13062
CDKN2D	0.49688	0.902272	0.0446625	0.063438	0.9353
CEP164	0.2258	0.996442	0.00154798	0.68987	0.84428
CEP57	0.66117	0.866588	0.0621873	0.054162	0.98276
CEP63	0.16842	0.996442	0.00154798	0.33253	0.35674
CETN2	1.1387	0.902272	0.0446625	0.065089	0.97868
CHAF1A	-1.0351	0.825472	0.0832977	0.72644	0.02753
CHAF1B	-0.14292	0.842407	0.074478	0.93284	0.05141
CHD1L	0.40508	0.996442	0.00154798	0.19091	0.5224
CHD3	0.2909	0.996442	0.00154798	0.32691	0.96495
CHD4	-0.18525	0.995664	0.0018872	0.60849	0.48031
CHEK1	0.191	0.996442	0.00154798	0.53299	0.035549
CHEK2	1.0544	0.826242	0.0828927	0.037937	0.98812
CHFR	0.25227	0.996442	0.00154798	0.61429	0.92251
CHRAC1	-1.1621	0.825472	0.0832977	0.9871	0.018961
CHTF18	-0.6387	0.883263	0.05391	0.91839	0.1299
CIB1	-0.32502	0.995664	0.0018872	0.96445	0.47838
CLK2	0.37915	0.996442	0.00154798	0.27789	0.95651
CLSPN	0.21413	0.996442	0.00154798	0.51262	0.36509
CNOT4	0.1201	0.996442	0.00154798	0.38118	0.56737
CNOT7	-0.37559	0.860932	0.0650311	0.43728	0.10224
COL1A1	0.60606	0.966246	0.0149123	0.077501	0.97426
COL21A1	-0.087758	0.983879	0.00705831	0.58864	0.37366
COPS2	0.16656	0.996442	0.00154798	0.4914	0.8644
COPS3	-0.81625	0.842407	0.074478	0.38368	0.051921
COPS4	-0.15424	0.999995	2.17148e-06	0.85209	0.79217
COPS5	0.201	0.996442	0.00154798	0.17706	0.77786
COPS6	0.15643	0.996442	0.00154798	0.25832	0.29273
COPS7A	0.44495	0.996442	0.00154798	0.39604	0.92338
COPS7B	-0.010357	0.999995	2.17148e-06	0.79528	0.77032
COPS8	0.13026	0.996442	0.00154798	0.20002	0.86585
CREBBP	0.12896	0.996442	0.00154798	0.60378	0.8401
CRY1	0.13676	0.996442	0.00154798	0.59817	0.5592
CRY2	0.13628	0.997587	0.00104922	0.85	0.90341
CSNK1D	0.036418	0.996442	0.00154798	0.48072	0.54159
CSNK1E	-0.30449	0.992494	0.00327211	0.60953	0.39872
CSNK2A1	-0.61669	0.825472	0.0832977	0.95523	0.028926
CSNK2A2	0.96089	0.826242	0.0828927	0.031206	0.92186
CSNK2B	-0.64573	0.983879	0.00705831	0.8044	0.20045
CTC1	0.68546	0.996442	0.00154798	0.17153	0.85736
CTCF	0.21995	0.996442	0.00154798	0.33627	0.53809
CUL1	-0.43362	0.92774	0.0325737	0.96128	0.15752
CUL2	-0.10165	0.995664	0.0018872	0.85608	0.73354
CUL3	0.33724	0.996442	0.00154798	0.31536	0.48687
CUL4A	0.12408	0.996442	0.00154798	0.59258	0.79301
CUL4B	0.094487	0.996442	0.00154798	0.64606	0.48343
CUL5	0.92164	0.826242	0.0828927	0.033859	0.95593
CUL7	0.017745	0.996442	0.00154798	0.67081	0.66713
CUL9	0.70977	0.996442	0.00154798	0.12948	0.91316
CXXC1	0.18565	0.996442	0.00154798	0.49812	0.49393
CXorf57	-0.13684	0.983879	0.00705831	0.80837	0.38422
DAXX	0.34277	0.996442	0.00154798	0.35996	0.60325
DBF4	-0.85538	0.842407	0.074478	0.79391	0.044973
DCAF11	-0.058472	0.995664	0.0018872	0.56478	0.58092
DCLRE1A	-0.0094352	0.860932	0.0650311	0.82293	0.099651
DCLRE1B	-0.2348	0.983879	0.00705831	0.67237	0.30862
DCLRE1C	-0.16486	0.995664	0.0018872	0.83179	0.52093
DCUN1D1	0.033846	0.996442	0.00154798	0.28153	0.77877
DCUN1D2	0.35511	0.996442	0.00154798	0.17245	0.37631
DCUN1D3	0.58101	0.996442	0.00154798	0.15443	0.75892
DCUN1D4	0.91711	0.816731	0.087921	0.028307	0.82296
DCUN1D5	-0.14384	0.995664	0.0018872	0.85834	0.4122
DDB1	0.27525	0.996442	0.00154798	0.51904	0.56261
DDB2	0.22709	0.996442	0.00154798	0.44854	0.65521
DDX1	0.68505	0.996442	0.00154798	0.13284	0.56863
DDX11	-1.2866	0.860932	0.0650311	0.86684	0.084586
DICER1	-0.10573	0.995664	0.0018872	0.83118	0.75712
DKC1	-0.97721	0.825472	0.0832977	0.98612	0.0069919
DLGAP5	0.16547	0.996442	0.00154798	0.68158	0.54541
DMC1	0.25571	0.996442	0.00154798	0.47522	0.6209
DNA2	0.71072	0.996442	0.00154798	0.11178	0.84952
DNAJC2	0.46287	0.996442	0.00154798	0.34798	0.72948
DNMT1	-0.32631	0.983879	0.00705831	0.53451	0.2246
DNTT	-0.06386	0.995664	0.0018872	0.73163	0.64236
DPY30	0.72606	0.996442	0.00154798	0.28004	0.50367
DROSHA	0.58581	0.996442	0.00154798	0.32898	0.51631
DSCC1	0.035016	0.997587	0.00104922	0.84091	0.54738
DTX1	-0.39253	0.860932	0.0650311	0.97045	0.091721
DTX2	-0.084492	0.995664	0.0018872	0.89815	0.494
DTX3	-0.40122	0.983879	0.00705831	0.47206	0.32967
DTX3L	0.35801	0.996442	0.00154798	0.39703	0.50527
DTX4	1.2726	0.306604	0.513422	0.0028744	0.68399
DUT	-0.07093	0.983879	0.00705831	0.87039	0.33493
DYNLL1	0.0043963	0.997587	0.00104922	0.88018	0.77572
ECT2	0.090922	0.996442	0.00154798	0.37349	0.62443
EEPD1	0.34933	0.996442	0.00154798	0.21003	0.73069
EID3	0.13461	0.996442	0.00154798	0.47776	0.74957
EIF4A1	-0.36448	0.983879	0.00705831	0.38841	0.24598
EME1	-0.10316	0.995664	0.0018872	0.69528	0.43716
EME2	-0.15662	0.995664	0.0018872	0.27252	0.47627
ENDOV	-0.012257	0.999995	2.17148e-06	0.73623	0.86327
ENY2	0.18605	0.996442	0.00154798	0.54719	0.8246
EP300	0.5185	0.996442	0.00154798	0.26391	0.95686
EP400	0.26517	0.996442	0.00154798	0.41331	0.9628
ERCC1	-0.10043	0.995664	0.0018872	0.9531	0.49175
ERCC2	-0.81883	0.849653	0.0707584	0.42299	0.076951
ERCC3	-0.62412	0.842407	0.074478	0.74676	0.065866
ERCC4	0.83188	0.996442	0.00154798	0.15937	0.52698
ERCC5	0.29522	0.996442	0.00154798	0.36641	0.54231
ERCC6	0.27731	0.996442	0.00154798	0.63684	0.55613
ERCC6L	-0.76421	0.842407	0.074478	0.86819	0.070848
ERCC6L2	0.473	0.996442	0.00154798	0.1982	0.61902
ERCC8	0.71051	0.996442	0.00154798	0.33574	0.85149
ESCO2	0.49103	0.996442	0.00154798	0.24413	0.32469
ETAA1	0.053689	0.996442	0.00154798	0.66728	0.60023
EXD2	0.28352	0.996442	0.00154798	0.57182	0.87507
EXO1	0.030556	0.996442	0.00154798	0.66532	0.78647
EXO5	0.36704	0.996442	0.00154798	0.36512	0.82913
EYA1	-0.040673	0.995664	0.0018872	0.10253	0.60747
EYA2	-0.51633	0.983879	0.00705831	0.98449	0.20975
EYA3	0.16934	0.996442	0.00154798	0.56716	0.69821
EYA4	0.2849	0.996442	0.00154798	0.36376	0.27418
EZH2	0.032307	0.996442	0.00154798	0.51041	0.34066
FAF1	0.64968	0.826242	0.0828927	0.041328	0.98693
FAM122A	0.16052	0.996442	0.00154798	0.10046	0.85409
FAM175A	0.30582	0.996442	0.00154798	0.30348	0.94502
FAM175B	1.0492	0.769373	0.113863	0.02243	0.93769
FAM178A	0.39969	0.951527	0.0215789	0.075329	0.62472
FAM35A	0.036885	0.996442	0.00154798	0.57831	0.47419
FAN1	-0.045373	0.995664	0.0018872	0.70033	0.48431
FANCA	0.08628	0.996442	0.00154798	0.50023	0.48135
FANCB	-0.51537	0.860932	0.0650311	0.84369	0.093381
FANCC	-0.52211	0.842407	0.074478	0.96118	0.070701
FANCD2	-0.38914	0.825472	0.0832977	0.98884	0.035323
FANCE	0.66993	0.996442	0.00154798	0.19375	0.8867
FANCF	0.043062	0.996442	0.00154798	0.5249	0.50598
FANCG	0.17988	0.996442	0.00154798	0.32533	0.92113
FANCI	0.66431	0.996442	0.00154798	0.22615	0.21827
FANCL	-0.028955	0.869909	0.0605262	0.56394	0.10893
FANCM	-0.75542	0.842407	0.074478	0.9866	0.059832
FBXO18	0.037853	0.996442	0.00154798	0.64133	0.70212
FBXO22	-0.20298	0.995664	0.0018872	0.30247	0.4602
FBXW7	-0.3499	0.983879	0.00705831	0.79685	0.35332
FEN1	-0.85704	0.860932	0.0650311	0.84088	0.087475
FIGNL1	-0.56916	0.914069	0.039021	0.71818	0.15159
FOXM1	-0.4882	0.859683	0.0656617	0.63022	0.080783
FOXN3	0.037349	0.996442	0.00154798	0.69182	0.87984
FOXO3	0.32712	0.996442	0.00154798	0.16424	0.89217
FZR1	0.90031	0.826242	0.0828927	0.032139	0.88462
GABBR1	0.53086	0.996442	0.00154798	0.27241	0.96405
GADD45A	0.56865	0.996442	0.00154798	0.22667	0.88568
GADD45G	0.35152	0.996442	0.00154798	0.29998	0.85177
GAR1	0.34499	0.996442	0.00154798	0.28282	0.6882
GEN1	0.51218	0.996442	0.00154798	0.10796	0.95488
GLG1	0.71941	0.996442	0.00154798	0.17423	0.24925
GPI	0.29613	0.996442	0.00154798	0.60618	0.63268
GPS1	0.57546	0.978659	0.00936861	0.080027	0.97347
GTF2H1	-0.25299	0.983879	0.00705831	0.73467	0.24159
GTF2H2	1.2667	0.850417	0.0703681	0.046064	0.29364
GTF2H3	-0.52326	0.842407	0.074478	0.95254	0.062446
GTF2H4	-0.4455	0.936946	0.0282854	0.53828	0.16201
GTF2H5	-0.18058	0.983879	0.00705831	0.13854	0.28817
H2AFX	0.10179	0.996442	0.00154798	0.65571	0.29986
H2AFY	-0.074829	0.995664	0.0018872	0.84842	0.48328
H2AFY2	-0.16999	0.995664	0.0018872	0.47556	0.72102
H2AFZ	0.76087	0.769373	0.113863	0.019541	0.99397
H3F3A	-0.076614	0.995664	0.0018872	0.8663	0.72059
H3F3B	-0.17993	0.995664	0.0018872	0.48378	0.46427
HDAC1	0.3087	0.996442	0.00154798	0.45272	0.89051
HDAC10	0.18801	0.997587	0.00104922	0.82698	0.79326
HDAC2	0.064561	0.996442	0.00154798	0.28469	0.14531
HDAC3	-1.0457	0.825472	0.0832977	0.99734	0.0091146
HDAC4	0.1894	0.996442	0.00154798	0.48472	0.59343
HDAC9	0.15644	0.996442	0.00154798	0.63406	0.25848
HELB	0.74951	0.978659	0.00936861	0.082139	0.97271
HELLS	-0.39264	0.921238	0.0356282	0.58591	0.15546
HELQ	-0.13339	0.995664	0.0018872	0.41484	0.7313
HERC2	0.40564	0.996442	0.00154798	0.27404	0.3718
HES1	0.37758	0.996442	0.00154798	0.33099	0.95523
HFM1	0.3556	0.996442	0.00154798	0.31755	0.46353
HINFP	-0.98622	0.842407	0.074478	0.39359	0.04462
HIPK1	0.46169	0.996442	0.00154798	0.33816	0.70467
HIPK2	0.47458	0.996442	0.00154798	0.49227	0.72576
HLTF	0.2933	0.996442	0.00154798	0.44808	0.36966
HMGA1	-0.12634	0.995664	0.0018872	0.4713	0.70322
HMGA2	-0.27143	0.995664	0.0018872	0.2051	0.70346
HMGB1	0.64538	0.996442	0.00154798	0.17205	0.95254
HMGB2	0.54606	0.996442	0.00154798	0.28006	0.78256
HMGN1	0.94286	0.996442	0.00154798	0.14277	0.74645
HNRNPK	0.12187	0.996442	0.00154798	0.66146	0.81016
HNRNPUL1	0.040017	0.996442	0.00154798	0.15147	0.8483
HNRNPUL2	0.5644	0.996442	0.00154798	0.38543	0.6201
HPRT1	-0.0047165	0.983879	0.00705831	0.49779	0.27766
HUS1	0.22814	0.996442	0.00154798	0.48809	0.49883
HUS1B	0.55735	0.996442	0.00154798	0.30661	0.57227
HUWE1	0.09098	0.996442	0.00154798	0.59145	0.53555
ID3	0.62725	0.996442	0.00154798	0.20359	0.93256
IGHMBP2	0.23088	0.996442	0.00154798	0.4904	0.90699
ING4	-0.7337	0.842407	0.074478	0.9823	0.068116
INO80	-0.28924	0.983879	0.00705831	0.67291	0.29843
INO80B	-0.15345	0.995664	0.0018872	0.95504	0.51213
INO80C	-0.44033	0.842407	0.074478	0.87919	0.072833
INO80D	-0.27653	0.983879	0.00705831	0.64527	0.2292
INO80E	-0.37095	0.983879	0.00705831	0.68653	0.28047
IP6K3	-0.045451	0.96793	0.014156	0.17881	0.19056
KAT2A	0.15283	0.996442	0.00154798	0.44485	0.20578
KAT2B	0.80533	0.860809	0.0650932	0.052678	0.62253
KAT5	0.2793	0.996442	0.00154798	0.45251	0.81267
KAT8	0.86078	0.996442	0.00154798	0.10642	0.88523
KDM1A	1.1266	0.816731	0.087921	0.027855	0.61499
KDM2A	0.011842	0.996442	0.00154798	0.34217	0.32621
KDM4A	0.48235	0.996442	0.00154798	0.20508	0.96757
KDM4D	-0.14643	0.995664	0.0018872	0.76429	0.45625
KDM5A	0.34974	0.996442	0.00154798	0.41289	0.77473
KEAP1	1.6536	0.001179	2.92849	4.9135e-06	0.99999
KIAA1586	0.031274	0.996442	0.00154798	0.19301	0.53995
KLHL15	0.10872	0.996442	0.00154798	0.34398	0.36415
KMT2A	-0.55856	0.96793	0.014156	0.91812	0.19044
L3MBTL1	0.22756	0.996442	0.00154798	0.65716	0.14742
LATS1	-0.043689	0.995664	0.0018872	0.62298	0.51951
LATS2	0.49055	0.996442	0.00154798	0.38325	0.86113
LIG1	0.31055	0.996442	0.00154798	0.59271	0.65494
LIG3	0.078625	0.997587	0.00104922	0.91799	0.67602
LIG4	0.090863	0.996442	0.00154798	0.63087	0.43426
LMNA	-0.41312	0.825472	0.0832977	0.89071	0.038448
Luciferase
MAD2L2	0.4863	0.996442	0.00154798	0.36118	0.29321
MAPK14	0.72008	0.860809	0.0650932	0.051332	0.89541
MAPK8	0.044693	0.996442	0.00154798	0.60126	0.59689
MAPKAPK2	1.3592	0.306604	0.513422	0.0028154	0.86614
MARK3	0.31313	0.996442	0.00154798	0.33651	0.30729
MASTL	-0.8646	0.914069	0.039021	0.76537	0.13834
MAU2	0.6314	0.996442	0.00154798	0.17825	0.96818
MB21D1	-0.014161	0.995664	0.0018872	0.64938	0.49898
MBD4	0.21767	0.996442	0.00154798	0.60178	0.93715
MBTD1	0.12528	0.996442	0.00154798	0.45625	0.60198
MCM10	0.2906	0.996442	0.00154798	0.29344	0.89798
MCM2	0.031855	0.997587	0.00104922	0.83492	0.26278
MCM3	-0.42928	0.983879	0.00705831	0.91328	0.33239
MCM3AP	-0.37209	0.849653	0.0707584	0.90988	0.075752
MCM4	-0.1683	0.995664	0.0018872	0.9705	0.56395
MCM5	-0.20777	0.995664	0.0018872	0.83935	0.46487
MCM6	-0.050908	0.983879	0.00705831	0.66438	0.26753
MCM7	-0.13242	0.983879	0.00705831	0.78025	0.36122
MCM8	0.1535	0.996442	0.00154798	0.45486	0.67238
MCM9	-0.064361	0.995664	0.0018872	0.76386	0.64614
MCPH1	0.51763	0.996442	0.00154798	0.31171	0.78858
MCRS1	-0.11405	0.995664	0.0018872	0.13123	0.69645
MDC1	-0.70402	0.825472	0.0832977	0.99002	0.031786
MDM2	-0.50391	0.873415	0.0587794	0.93256	0.11646
MDM4	0.032092	0.997587	0.00104922	0.85096	0.71123
MEN1	-0.46061	0.940137	0.0268089	0.52964	0.16876
METTL3	1.0075	0.769373	0.113863	0.020484	0.94654
MGMT	0.083618	0.996442	0.00154798	0.52725	0.24462
MLH1	-0.13335	0.983879	0.00705831	0.90016	0.33193
MLH3	0.4746	0.996442	0.00154798	0.26437	0.47236
MMS19	-0.19516	0.983879	0.00705831	0.53139	0.30667
MMS22L	-0.19716	0.842407	0.074478	0.43172	0.059979
MNAT1	0.063568	0.996442	0.00154798	0.51764	0.83245
MORF4L1	0.58105	0.996442	0.00154798	0.22767	0.91653
MORF4L2	0.69341	0.996442	0.00154798	0.14242	0.95852
MPG	0.90186	0.769373	0.113863	0.020337	0.99368
MPLKIP	0.054699	0.996442	0.00154798	0.58001	0.41103
MPZ	-0.71183	0.825472	0.0832977	0.71835	0.036208
MRE11A	0.13099	0.996442	0.00154798	0.39127	0.48556
MSH2	-0.023984	0.999995	2.17148e-06	0.52457	0.83014
MSH3	-0.029186	0.995664	0.0018872	0.86145	0.41963
MSH4	0.38951	0.860809	0.0650932	0.050231	0.98405
MSH5	0.30683	0.996442	0.00154798	0.33139	0.62374
MSH6	0.64931	0.996442	0.00154798	0.42459	0.9297
MTA1	-0.4601	0.983879	0.00705831	0.9426	0.22576
MTA2	0.047017	0.996442	0.00154798	0.50093	0.79716
MTA3	0.27825	0.996442	0.00154798	0.66351	0.63029
MTOR	-0.10172	0.995664	0.0018872	0.76784	0.7431
MUM1	1.0726	0.996442	0.00154798	0.087416	0.95752
MUS81	0.46102	0.996442	0.00154798	0.30795	0.49031
[truncated: 575 more rows]

## Sheet: Haapaniemi, TP53-KO
Gene	lfc	fdr	fdr_log10	pos_p	neg_p
[truncated: 968 more rows]
