# Supplementary material for: Parallel CRISPR-Cas9 screens clarify impacts of p53 on screen performance
Source: eLife. 2020 May 22;9:e55325. doi: 10.7554/eLife.55325 (PMC7244323; doi:10.7554/eLife.55325)
Supplement: Supplementary file 4. — A CSV that gives results of Fisher's exact test for enrichment of selected GO and KEGG terms. Each row gives the results for a particular term. Genes that are present in the CRISPR library that match terms are listed in the ‘intersection’ column. Significance statistics for genes enriched or depleted in the screen are presented. [file elife-55325-supp4.csv]

term_id	source	term_name	intersections	pos_p	significant_genes_pos_p	pos_fdr	neg_p	significant_genes_neg_p	neg_fdr
KEGG:03410	KEGG	Base excision repair	APEX1, APEX2, FEN1, HMGB1, LIG1, LIG3, MBD4, MPG, MUTYH, NEIL1, NEIL2, NEIL3, NTHL1, OGG1, PARP1, PARP2, PARP3, PARP4, PCNA, POLB, POLD1, POLD2, POLD3, POLD4, POLE, POLE2, POLE3, POLE4, POLL, SMUG1, TDG, UNG, XRCC1	1.0		1.0	0.2553914031978979	NEIL1, OGG1, POLE3, POLL	0.6384785079947447
GO:0006284	GO:BP	Base excision repair	APEX1, APEX2, DNA2, DNTT, ERCC6, FEN1, HMGA1, HMGA2, HUWE1, LIG1, LIG3, MBD4, MPG, MUTYH, NEIL1, NEIL2, NEIL3, NTHL1, OGG1, PARP2, PCNA, POLB, POLD1, POLE, POLG, POLL, POLM, POLQ, PRMT6, RPA1, RPA2, RPA3, SIRT6, SMUG1, TDG, TP53, UNG, USP47, WRN, XPA, XRCC1	0.9302700372998546	TP53	0.9302700372998546	0.2084332196581988	HMGA1, NEIL1, OGG1, POLL, WRN	0.7977904679759507
KEGG:04110	KEGG	Cell cycle	ABL1, ATM, ATR, BUB1B, CCNA1, CCNA2, CCNB1, CCNB2, CCNB3, CCND1, CCND2, CCND3, CCNE1, CCNH, CDC25A, CDC25B, CDC7, CDK1, CDK2, CDK4, CDK7, CDKN1A, CDKN1B, CDKN2A, CDKN2D, CHEK1, CHEK2, CREBBP, CUL1, DBF4, EP300, FZR1, GADD45A, GADD45G, HDAC1, HDAC2, MAD2L2, MCM2, MCM3, MCM4, MCM5, MCM6, MCM7, MDM2, ORC2, PCNA, PLK1, PRKDC, RAD21, RBX1, SKP1, SMC1A, SMC1B, SMC3, STAG1, STAG2, TP53, WEE1	1.815651040890529e-05	ABL1, ATM, CCNB1, CDK7, CDKN1A, CDKN2D, CHEK2, CUL1, EP300, MCM6, RAD21, STAG1, TP53	0.00018156510408905288	0.9468912668721128	CREBBP, MDM2	0.9529288572603385
GO:0051321	GO:BP	Cell cycle	ATM, ATRX, BRCA2, BRDT, BRIP1, BUB1B, CCNA1, CCNB3, CCNE1, CDC25A, CDC25B, CDK2, DMC1, EME1, EME2, ERCC1, ERCC4, EXO1, FANCA, FANCD2, FANCM, FIGNL1, FZR1, H2AFX, HFM1, HUS1, HUS1B, MASTL, METTL3, MLH1, MLH3, MRE11A, MSH3, MSH4, MSH5, MSH6, MUS81, NBN, NCAPD2, NCAPD3, NCAPH, NCAPH2, PLK1, PRDM9, RAD1, RAD21, RAD50, RAD51, RAD51B, RAD51C, RAD51D, RAD54B, RAD54L, RBBP8, RBM7, RMI1, RPA1, SIRT2, SLX4…	0.6818473911868219	ATM, NCAPH, RAD21, RAD51C	0.8182168694241863	0.9380931521121785	EXO1, TOP2B, TRIP13	0.9380931521121785
GO:0031497	GO:BP	chromatin assembly	ASF1A, ASF1B, ATRX, BRD2, CDKN2A, CHAF1A, CHAF1B, CTCF, DAXX, H2AFX, H2AFY, H2AFY2, H3F3A, H3F3B, HELLS, HMGA1, HMGA2, HMGB2, MCM2, NPM1, POLE3, PRDM9, RBBP7, RUVBL1, SET, SHPRH, SIRT6, SMARCA5, TP53	0.26992677008822974	CHAF1A, RUVBL1, TP53	0.7708990909646524	0.07081594816709516	DAXX, HELLS, HMGA1, NPM1, POLE3	0.42489568900257096
GO:0006338	GO:BP	chromatin remodeling	ACTL6A, ACTR5, ACTR8, ANP32E, ARID1A, ARID1B, ATRX, BAZ1A, BAZ1B, BPTF, BRDT, CBX3, CDKN2A, CHD1L, CHD3, CHD4, CHRAC1, DAXX, ERCC6, H3F3A, H3F3B, HDAC1, HDAC2, HDAC4, HELLS, HMGA1, HMGA2, INO80, INO80B, INO80C, INO80E, KAT2A, KAT2B, KDM4A, KDM4D, KDM5A, MTA2, NPM1, PAK1, PBRM1, POLE3, RBBP7, RNF8, RUVBL1, RUVBL2, SIRT6, SMARCA2, SMARCA4, SMARCA5, SMARCAD1, SMARCB1, SMARCC2, SMARCD1, SMARCE1, SUPT…	0.5265377876704748	BPTF, CHD3, INO80, RUVBL1	0.7856882331791004	0.015660946095911295	ANP32E, ARID1A, BAZ1A, DAXX, HELLS, HMGA1, KDM5A, NPM1, POLE3, SMARCD1	0.18793135315093554
GO:0000077	GO:BP	DNA damage checkpoint	ATF2, ATM, ATR, ATRIP, BABAM1, BLM, BRCA1, BRCC3, BRIP1, BTG2, CCNB1, CCND1, CDC5L, CDK1, CDK2, CDKN1A, CDKN1B, CEP63, CHEK1, CHEK2, CLSPN, CNOT4, CNOT7, CRY1, CUL4A, EME1, EME2, EP300, ERCC6, ETAA1, FOXN3, FZR1, GADD45A, H2AFX, HINFP, HMGA2, HUS1, HUS1B, MAPK14, MDC1, MDM2, MDM4, MRE11A, MSH2, MUS81, NBN, NEK11, PCNA, PLK1, PML, PRKDC, PRMT1, PRPF19, RAD1, RAD17, RAD9A, RAD9B, RFWD3, RHNO1, RPA2…	0.00020738624282636903	ATM, BRCC3, CCNB1, CDKN1A, CHEK2, CLSPN, EP300, TAOK2, TAOK3, THOC1, TP53, TP53BP1, USP28	0.0024886349139164286	0.6612165875432868	BRCA1, CNOT7, MDM2, MDM4, RPS27L	0.7977904679759507
KEGG:03030	KEGG	DNA replication	DNA2, FEN1, LIG1, MCM2, MCM3, MCM4, MCM5, MCM6, MCM7, PCNA, POLA1, POLD1, POLD2, POLD3, POLD4, POLE, POLE2, POLE3, POLE4, RFC1, RFC2, RFC3, RFC4, RFC5, RNASEH2A, RPA1, RPA2, RPA3, RPA4, SSBP1	0.569799381142357	MCM6, RFC2	1.0	0.91684338096281	POLE3	0.9529288572603385
GO:0006260	GO:BP	DNA replication	AICDA, ATAD5, ATM, ATR, ATRIP, ATRX, BARD1, BAZ1A, BLM, BOD1L1, BRCA1, BRCA2, BRIP1, CCNA2, CCNE1, CDC34, CDC7, CDK1, CDK2, CDK9, CHAF1A, CHAF1B, CHEK1, CHEK2, CHTF18, CLSPN, CTC1, DBF4, DDX11, DNA2, DNAJC2, DSCC1, DUT, EME1, EME2, ESCO2, ETAA1, EXD2, EXO1, FAF1, FANCM, FEN1, GEN1, HELB, HMGA1, HUS1, ID3, IGHMBP2, ING4, INO80, KAT5, LIG1, LIG3, LIG4, MCM10, MCM2, MCM3, MCM4, MCM5, MCM6, MCM7, MCM…	0.22556602458596658	ATM, CHAF1A, CHEK2, CLSPN, CTC1, INO80, MCM6, RFC2, SETMAR, THOC1, TP53	0.7708990909646524	0.5225207395354243	BAZ1A, BRCA1, EXO1, HMGA1, LIG4, MCM9, PDS5A, POLE3, POLL, USP37, WRN	0.7977904679759507
KEGG:03460	KEGG	Fanconi anemia pathway	ATR, ATRIP, BLM, BRCA1, BRCA2, BRIP1, C19ORF40, EME1, EME2, ERCC1, ERCC4, FAN1, FANCA, FANCB, FANCC, FANCD2, FANCE, FANCF, FANCG, FANCI, FANCL, FANCM, HES1, MLH1, MUS81, PALB2, PMS2, POLH, POLI, POLK, POLN, RAD51, RAD51C, REV1, REV3L, RMI1, RMI2, RPA1, RPA2, RPA3, RPA4, SLX1A, SLX4, TELO2, TOP3A, TOP3B, UBE2T, USP1, WDR48	0.817229334079334	RAD51C, TELO2	1.0	0.1704384066692865	BRCA1, FANCF, FANCG, SLX1A, UBE2T, WDR48	0.568128022230955
KEGG:03440	KEGG	Homologous recombination	ATM, BABAM1, BARD1, BLM, BRCA1, BRCA2, BRCC3, BRIP1, EME1, MRE11A, MUS81, NBN, PALB2, POLD1, POLD2, POLD3, POLD4, RAD50, RAD51, RAD51B, RAD51C, RAD51D, RAD52, RAD54L, RBBP8, RPA1, RPA2, RPA3, RPA4, SHFM1, SSBP1, TOP3A, TOP3B, TOPBP1, UIMC1, XRCC2, XRCC3	0.40601217716750926	ATM, BRCC3, RAD51C	1.0	0.9529288572603385	BRCA1	0.9529288572603385
GO:0035825	GO:BP	Homologous recombination	ATM, BRIP1, DMC1, EME1, EME2, ERCC4, FANCM, HDAC10, HFM1, MLH1, MLH3, MRE11A, MSH3, MSH4, MSH5, MUS81, PRDM9, RAD21, RAD50, RAD51, RAD51B, RAD51C, RAD51D, RAD54B, RAD54L, RMI1, SLX4, SPO11, TOP2A, TOP2B, TRIP13, UBE2B	0.3212079545686052	ATM, RAD21, RAD51C	0.7708990909646524	0.7313079289779547	TOP2B, TRIP13	0.7977904679759507
KEGG:03430	KEGG	Mismatch repair	EXO1, LIG1, MLH1, MLH3, MSH2, MSH3, MSH6, PCNA, PMS2, POLD1, POLD2, POLD3, POLD4, RFC1, RFC2, RFC3, RFC4, RFC5, RPA1, RPA2, RPA3, RPA4, SSBP1	0.7786508091657897	RFC2	1.0	0.8524781812328192	EXO1	0.9529288572603385
GO:0006298	GO:BP	Mismatch repair	ABL1, ERCC1, EXO1, HDAC10, HMGB1, LIG1, MCM9, MLH1, MLH3, MSH2, MSH3, MSH4, MSH5, MSH6, MUTYH, PCNA, PMS1, PMS2, POLD1, POLD2, POLD3, POLD4, PRKCG, RNASEH2A, RPA1, RPA2, RPA3, SETD2, TDG, TP73, TREX1, XPC	0.8760975161748756	ABL1	0.9302700372998546	0.7313079289779547	EXO1, MCM9	0.7977904679759507
GO:0006303	GO:BP	Non-homologous end-joining	ATM, AUNIP, BABAM1, BARD1, BRCA1, BRCC3, DCLRE1A, DCLRE1B, DCLRE1C, DNTT, DTX3L, ERCC1, ERCC4, ERCC6, ERCC8, H2AFX, HERC2, HMGA2, KAT5, KDM2A, KDM4D, LIG3, LIG4, MAD2L2, MDC1, MLH1, MRE11A, NBN, NHEJ1, NUDT16L1, PARP3, PARP9, PAXIP1, PIAS4, POLA1, POLB, POLL, POLM, POLQ, PRKDC, PRPF19, PSMD14, RAD50, RIF1, RNF168, RNF8, SETMAR, SUMO1, TP53BP1, UBE2N, UBE2V2, UIMC1, USP51, UVRAG, WRAP53, XRCC1, XR…	0.48841855449164917	ATM, BRCC3, SETMAR, TP53BP1	0.7856882331791004	0.29332904572687407	BRCA1, DCLRE1C, LIG4, PIAS4, POLL, RNF168	0.7977904679759507
KEGG:03450	KEGG	Non-homologous end-joining	DCLRE1C, DNTT, FEN1, LIG4, MRE11A, NHEJ1, POLL, POLM, PRKDC, RAD50, XRCC4, XRCC5, XRCC6	1.0		1.0	0.07839574218121699	DCLRE1C, LIG4, POLL	0.39197871090608494
GO:0098813	GO:BP	nuclear chromosome segregation	AKAP8, APC, ATM, ATRX, BRIP1, BUB1B, CCNB1, CCNE1, CDCA5, CTCF, CUL3, DDX11, DLGAP5, DMC1, DSCC1, ECT2, EME1, EME2, ERCC4, ESCO2, FANCD2, FANCM, FBXW7, FEN1, GEN1, H2AFY, HFM1, INO80, LATS1, MAD2L2, MAU2, MLH1, MLH3, MRE11A, MSH4, MUS81, NCAPD2, NCAPD3, NCAPG, NCAPH, NCAPH2, NEK6, NIPBL, NSMCE2, PCID2, PDS5A, PDS5B, PINX1, PLK1, RAD21, RAD51C, RMI1, RMI2, SFPQ, SIRT2, SLX4, SMC1A, SMC1B, SMC2, SM…	0.06428280529770426	APC, ATM, CCNB1, INO80, NCAPH, RAD21, RAD51C, STAG1	0.3856968317862256	0.4794205181098295	CUL3, FBXW7, PDS5A, PDS5B, TOP2B, TRIP13	0.7977904679759507
KEGG:03420	KEGG	Nucleotide excision repair	CCNH, CDK7, CETN2, CUL4A, CUL4B, DDB1, DDB2, ERCC1, ERCC2, ERCC3, ERCC4, ERCC5, ERCC6, ERCC8, GTF2H1, GTF2H2, GTF2H3, GTF2H4, GTF2H5, LIG1, MNAT1, PCNA, POLD1, POLD2, POLD3, POLD4, POLE, POLE2, POLE3, POLE4, RAD23A, RAD23B, RBX1, RFC1, RFC2, RFC3, RFC4, RFC5, RPA1, RPA2, RPA3, RPA4, XPA, XPC	0.7689258784462945	CDK7, RFC2	1.0	0.8702220129039744	ERCC5, POLE3	0.9529288572603385
GO:0006289	GO:BP	Nucleotide excision repair	ATXN3, BRCA2, BRIP1, CCNH, CDK7, CETN2, CHD1L, COPS2, COPS3, COPS4, COPS5, COPS6, COPS7A, COPS7B, COPS8, CUL4A, CUL4B, DDB1, DDB2, EP300, ERCC1, ERCC2, ERCC3, ERCC4, ERCC5, ERCC6, ERCC8, FAN1, FANCC, GPS1, GTF2H1, GTF2H2, GTF2H3, GTF2H4, GTF2H5, HMGN1, HUS1, HUS1B, LIG1, LIG3, LIG4, MMS19, MNAT1, NEIL1, NEIL2, NEIL3, NTHL1, OGG1, PARP1, PCNA, PNKP, POLD1, POLD2, POLD3, POLD4, POLE, POLK, POLL, PO…	0.5312256628371606	CDK7, COPS7A, EP300, RFC2, TP53, XAB2	0.7856882331791004	0.6098149413923453	COPS7B, ERCC5, LIG4, NEIL1, OGG1, POLL, USP7	0.7977904679759507
KEGG:04115	KEGG	p53 signaling pathway	APAF1, ATM, ATR, CASP3, CCNB1, CCNB2, CCND1, CCND2, CCND3, CCNE1, CDK1, CDK2, CDK4, CDKN1A, CDKN2A, CHEK1, CHEK2, DDB2, GADD45A, GADD45G, MDM2, MDM4, PPM1D, PTEN, RRM2, RRM2B, TP53, TP73	0.02635817162467244	ATM, CCNB1, CDKN1A, CHEK2, TP53	0.1317908581233622	0.38095322276307797	MDM2, MDM4, PPM1D	0.7619064455261559
GO:0000723	GO:BP	telomere maintenance	ACD, APEX1, ATM, ATR, ATRX, BLM, BRCA2, CCNE1, CTC1, DCLRE1A, DCLRE1B, DCLRE1C, DKC1, DNA2, ERCC1, ERCC4, EXO1, FEN1, GAR1, HUS1, HUS1B, MRE11A, NABP2, NBN, NHP2, NOP10, NSMCE2, PARP1, PARP3, PCNA, PIF1, PINX1, PML, PNKP, POLA1, POLD1, POLD2, POLD3, POLD4, POLE, POLE2, POLE3, POLE4, POT1, PRKDC, RAD50, RAD51, RAD51C, RAD51D, RECQL4, RFC1, RFC2, RFC3, RFC4, RFC5, RIF1, RPA1, RPA2, RPA3, RTEL1, SIR…	0.5892661748843253	ATM, CTC1, RAD51C, RFC2, TELO2	0.7856882331791004	0.6352122435064711	DCLRE1C, EXO1, POLE3, SLX1A, USP7, WRN	0.7977904679759507
KEGG:04120	KEGG	Ubiquitin mediated proteolysis	BRCA1, CDC34, CUL1, CUL2, CUL3, CUL4A, CUL4B, CUL5, CUL7, DDB1, DDB2, ERCC8, FANCL, FBXW7, FZR1, HERC2, HUWE1, KEAP1, MDM2, PARK2, PIAS1, PIAS2, PIAS3, PIAS4, PML, PRPF19, RBX1, RNF7, SAE1, SKP1, TCEB1, TRIP12, UBA1, UBA2, UBA3, UBE2A, UBE2B, UBE2C, UBE2D1, UBE2D2, UBE2D3, UBE2D4, UBE2F, UBE2I, UBE2K, UBE2M, UBE2N, UBE2NL, UBE2R2, UBE2S, UBE2U, UBE2W, UBR5	0.40847800910445814	CUL1, RNF7, TRIP12, UBE2D1	1.0	0.005376053268409844	BRCA1, CUL3, FBXW7, MDM2, PIAS4, UBE2C, UBE2D3, UBE2D4, UBE2M, UBE2S	0.05376053268409844
